# Supplementary material for: Predicting Inter-Species Cross-Talk in Two-Component Signalling Systems
Source: PLoS One. 2012 May 22;7(5):e37737. doi: 10.1371/journal.pone.0037737 (PMC3358273; doi:10.1371/journal.pone.0037737)
Supplement: Table S3 — Response Regulators. (XLS) [file pone.0037737.s005.xls]

## Sheet: RR_REC_sorted
#GI	YP	Organism	Description	Cluster	Sequence
158335817	1.51699e+06	Acaryochloris marina MBIC11017	_ hypothetical protein AM1_2670 _	0	MPVLDGYQAAQQIKTQPQPPIIIALTANAFEEDRSKALASGCDDYVRKPYKESIIW
158340478	1.52147e+06	Acaryochloris marina MBIC11017	_ two-component hybrid sensor and regulator _	0	LIVEDNLENLQIMHRLMTDMGFDVRTVNDGEAAISCWEAWHPHIIWMDWCLPVKNGFEATKTIRSLES
158334723	YP	Acaryochloris marina MBIC11017	_001515895.1_ two-component hybrid sensor and regulator _	0	ITDRLPERTIIIAVSASVFEDTQAECEDVGCDDFLCKPYQPSMLYEL
158340478	YP	Acaryochloris marina MBIC11017	_001521472.1_ two-component hybrid sensor and regulator _	0	SRTIIIALTASVFEDTQTECKEAGCDDFLSKPYQQSVLFE
158339144	1.52032e+06	Acaryochloris marina MBIC11017	_ sensory transduction histidine kinase _	0	ILLAEDREAIVLLLTDYLEEQGCRVAIATDGQTAIDLAKTQIPDLIFMDIRLPQVDGLEATRQIRTHLPDTPIIALTALLMPEDQERFLAAGFSDSLSKPLKMEQLTQML
158333448	YP	Acaryochloris marina MBIC11017	_001514620.1_ two-component hybrid sensor and regulator histidine kinase _	0	ILLAEDNPVNQKLAVLILAKMGYRPDVVGNGLEVLQALKRQSYDVILMDVNMPEMDGLTATTHIYQSIMPEERPRIIAMTANAMQGDREKCLDVGMDDYVTKPINIQELVVAL
158338239	1.51942e+06	Acaryochloris marina MBIC11017	_ serine/threonine protein kinase and signal transduction histidine kinase _STHK_ with GAF and PAS/PAC sensor _	0	ILVVEDQVDNQRLLIDHLSPLGFMMAAVNDGPSAIESWQSWRPHLIWMDLQLPGMNGLEVAKKIKDLAAASNSPPPIIIALTANAFDDVRIQALANGCDGFVSKPYILTEILD
158338757	1.51993e+06	Acaryochloris marina MBIC11017	_ two-component hybrid sensor and regulator _	0	ILVVEDHLDSQLLLQSWLTSVGFEVKTANNGREAVSQFQAWHSHLIWMDMRMPVMDGMQATRAIRALVQESESQAPEPVILALTASVFEENREKILSAGCNKFVRKPYKIQEIY
158338408	YP	Acaryochloris marina MBIC11017	_001519585.1_ two-component hybrid sensor and regulator _	0	LLLAEDVVVNQKVALLILKQLGYEADVANNGKEVLEALHRQPYDVVLMDLQMPEMDGLTASRAIQETWSPEARPYIIALTANAMQGDREKCLEAGMQDYVSKPIRSEELKAAL
158337906	YP	Acaryochloris marina MBIC11017	_001519082.1_ two-component hybrid sensor and regulator _	0	ILLAEDVAVNQKVALLILKQLGYSADVANDGHEVLAALKRQTYDIVLMDVHMPEMDGLTAAATIQKEWDAEDRPHIIALTANAMQGDRERCLAVGMQDYVSKPIRTEELQAAL
158339053	YP	Acaryochloris marina MBIC11017	_001520230.1_ two-component hybrid sensor and regulator _	0	ILLAEDMVVNQKVALLTLKQLGYRADVANNGLEVIEALERQAYDVVLMDVQMPEMDGLTATREVCQRWSPEDRPHIIAMTANAMQGDREMCLDAGMDAYITKPVRIHELRDV
158339052	YP	Acaryochloris marina MBIC11017	_001520229.1_ two-component hybrid sensor and regulator histidine kinase _	0	ILLAEDIVVNQKVALLILKQLGYRADVANNGEEVLEALHRQSYDVVLMDVQMPEMDGLTAARHITEQWQEEEQPYIIALTANAMQGDREMCMAAGMHDYVSKPIRVDELKSA
158338777	YP	Acaryochloris marina MBIC11017	_001519954.1_ two-component hybrid sensor and regulator histidine kinase _	0	ILVAEDNVINQKVILKLLDRLGYQADLVTNGLEVLTALQEQSYDVVLMDVQMPEMDGITTAQSICEQWDKTNRPHIVAMTANTMQGDRESYLAAGMDDYIAKPIRLKG
158338793	YP	Acaryochloris marina MBIC11017	_001519970.1_ two-component sensor histidine kinase _	0	ILVAEDVVVNQKLVLLLLQKMGYRADVVQNGLEALDALHRQPYDLILMDMQMPEMDGLTAARQICEEYSEAERPYIIALTANAMQGDRQRCLDAGMNAYISKPIQVEELVRAI
158335032	YP	Acaryochloris marina MBIC11017	_001516204.1_ two-component hybrid sensor and regulator histidine kinase _	0	ILVADDNTLNQQLMVQRLVHLGYSADVVSDGQQVVAACQTQMYDLILLDVQMPKMNGLEVVQTLRQQEMCPYVIGVSGRTLPEEKQECLDAGMQDYLCKPVSLEDLKVAL
158339377	1.52055e+06	Acaryochloris marina MBIC11017	_ two-component hybrid sensor and regulator _	0	ILIAEDHPENRQLMVKLLQSVGFQVRAAEDGQSVIDLWRTWHPHLILMDWQMPVLNGYQTTQQIRYLEAQCSTPLSTEERTVIIALTASVFESTQKESQEAGCDSFICKPFKEEELFNV
158334667	1.51584e+06	Acaryochloris marina MBIC11017	_ two-component hybrid sensor and regulator _	0	LVVEDNPENAQIVIDLMTSVGFEVQSVVNGQQAVACWQTWQPHVILMDWQMPVMNGYEATQTIRTLESQAGSTIHLQGSQDSSNSPSVLFPLNNTIIIALTASVFEDTKQECFKAGCDDFLRKPYQQSVLFEML
158334723	1.5159e+06	Acaryochloris marina MBIC11017	_ two-component hybrid sensor and regulator _	0	LIVEDNPENRQILKRLMTELGFEVQTVDNGQAAVECWQTWRPHMIWMDWQLPILNGYEATKAIRSLE
158338166	1.51934e+06	Acaryochloris marina MBIC11017	_ two-component hybrid histidine kinase sensor and regulator _	109	ILAVDDLPDNLMLLKMMLESAGYRIELVDSGPAALAQIQKAQPDLVILDVMMPGMSGYEVTQKIRNDPQLPYIPILLISAHERSSVVKGLDAGADDFIRKPVELEELQARV
158335119	1.51629e+06	Acaryochloris marina MBIC11017	_ response regulator receiver domain-containing protein _	116	RRLKRRGYDVVIAVDGGEGVTKALTEQPDLILMDMSLPVMNGWEATRTLKAGDQTATIPIIALTAHAMVGDREEALAAGCDDYDTKPVDLKRLLQKI
158338184	1.51936e+06	Acaryochloris marina MBIC11017	_ CheA signal transduction histidine kinase _	122	VLLVEDSIPIRTQMKRILQGAGYDVTAAVDGQEGLEKLQADRFDAVVSDVEMPNLTGLEMTAQIRQRQEYQQLPIVLVTTLAKEEDKRRGQEAGANAYLTKGDFDQTLLI
158340554	1.52155e+06	Acaryochloris marina MBIC11017	_ two-component transcriptional regulator _	127	ILVVDDEASIRRVLSTRLSKIGYQVYTAADGVEALDVFYDQRPDLIILDVMMPKLDGYGVCQAVRKASRVPIIMLTALSDVVDRITGLEMGADDYVVKPFSLKELESRV
158336368	1.51754e+06	Acaryochloris marina MBIC11017	_ two component transcriptional regulator _	127	ILVADDEASIRRILETRLSMMGFVVITAADGEEALQVFQHQEPDLIILDVMMPKLNGYQVCQSLRQESDVPIIMLTALSDVADRITGLEMGADDYMVKPFSPKELESRI
158338752	1.51993e+06	Acaryochloris marina MBIC11017	_ two-component transcriptional regulator _	127	ILVVDDEASIRRILETRLSMIGYDVVTAADGEEAIDTFHHAIPDLVVLDVMMPKLDGYGVCQELRKESDVPIIMLTALGDVADRITGLELGADDYVVKPFSPKELEARI
158340539	1.52153e+06	Acaryochloris marina MBIC11017	_ two-component transcriptional regulator _	127	ILVADDEVPIRRILGTRLSKIGYQVYTAADGVEALDVFYDQCPDLIILDVMMPKLDGYGVCQAVRKTSRVPIIMLTALSEVKDRITGLEMGADDYMVKPFSPKELESRV
158341219	1.52242e+06	Acaryochloris marina MBIC11017	_ two-component transcriptional regulator _	127	ILVVDDEGPIRRILDTRLSMMGYHVFTAADGVEALEIFDRQHPDLIVLDVMMPRLDGYGVCRAIRKTSRVPIIMLTALSEVGDRITGLEMGADDYMVKPFSPKELESRV
158340654	1.52182e+06	Acaryochloris marina MBIC11017	_ two-component transcriptional regulator _	127	ILVVDDEGPIRRILDTRLSMMGYHVFTAADGVEALEIFDRQHPDLIVLDVMMPRLDGYGVCRAIRKTSRVPIIMLTALSEVGDRVTGLEMGADDYMVKPFSPKELESRV
158334802	1.51597e+06	Acaryochloris marina MBIC11017	_ diguanylate cyclase _	128	ILIAEPDQEISNHIAQLLEKDGHLVMTTSNGEECLEAYKSIMPNLVILDAMMPKINGFECCRKLLKLSSGSPPLTLIITGLDEEESVNLAFESGASDFITKPIRWPILKQRV
158337549	1.51872e+06	Acaryochloris marina MBIC11017	_ circadian input kinase _	12	IVLIEGHEEDATLLCDMLTAANYQVIWMVEASAAIDQIRLLQPIAVIVDAQLPAQGCLGLIRRLRALPGTDKIKIIVLTQEGISKDHQRYLSLGADAYLLKSLQPEDLLRKV
158339671	1.52068e+06	Acaryochloris marina MBIC11017	_ response regulator receiver _	132	LLIVDDDEEICKQVKEILEDEEINNVRLSIIITTDFNDALEILENQRIDLIILDVREG
158333514	1.51469e+06	Acaryochloris marina MBIC11017	_ response regulator _	14	ILLVEDNPGDVFLITRMLEESSLSYTLHRVDNGKSATDFLRNLRSYEQAPFPQLILLDLNLPIMNGKEVLADIKTDQKLKHIPVIVLSTSNAPEDIEESYRLKADYYVTKPSSFHE
158338164	1.51934e+06	Acaryochloris marina MBIC11017	_ response regulator _	14	ILLVEDDEVDVMNVKRAFKKGMITNPLYVANNGLEALSMLRGEAGEKPPVPKHRRLILLDLNMPKMNGLEFLEVLRSDPDLQSIPVVVLTTSDEDRDRIEAYHYNVAGYILKPVTFS
158334889	1.51606e+06	Acaryochloris marina MBIC11017	_ response regulator _	14	ILMADDDEDDRMLTAEALEESRLSNDLRFVKDGEELMDYLFRRGQYADPKTSPRPGLILLDLNMPKKDGREALQEIKANPELRRIPIVVLTTSNTDIDIYRSYDLGANTYITKPVTFDALVEV
158338977	1.52015e+06	Acaryochloris marina MBIC11017	_ response regulator _	14	ILLVEDDEGDIELTLEAFNRSKVALRVNVVRDGIEALDYLQKKGEFETARTPDLMLLDLNLPRKDGREVLTDMQESDRFKQIPVVVLTTSDADEDILKSYKIGANAYVTKPVGLKGLVKVV
158336998	1.51817e+06	Acaryochloris marina MBIC11017	_ response regulator receiver, CheY-like protein _	14	LLLVEDDLADIELTQNGVQRSQAAIDLDWVVDGQSALSYLLREGEYQQKSLPSMILLDLNLPGIHGLQVLETIKQNDAFRMIPVIIFTTSDADRDIQKAYELGANCFIQKPASLSQYISTI
158337403	1.51858e+06	Acaryochloris marina MBIC11017	_ two-component hybrid sensor and regulator histidine kinase _	151	LVAEDQWDSRAVLAQLLQSVGFEVAEAANGEEAVRLVQSWHPHLVWMDMRMPVLDGLAATQQIKARSQPPIIIALTANAFVEDRQEALRVGCDDFVAKPYQIEQIYAKI
158333826	1.515e+06	Acaryochloris marina MBIC11017	_ two-component hybrid sensor and regulator histidine kinase _	151	ILVVEDHADNRCLLVTLLATIGFLVKSAQNGQEALEICQEWHPHLIWMDIKMPLMDGLEATQRIRAMPQIPQPVIIALTANAFDEDKERALTCGCDDFLHKPCNETIILE
158339071	1.52025e+06	Acaryochloris marina MBIC11017	_ two-component hybrid sensor and regulator histidine kinase _	151	ILVVEDNVDSRELLVTLLVTVGFTVKAAENGEVAIALCQSWQPHLVWMDLRLPVLDGLSATRLIKQLETPPVVIALTANAFDEDRDLALQAGCDDFVHKPYREASIFEK
158333425	1.5146e+06	Acaryochloris marina MBIC11017	_ two-component hybrid histidine kinase sensor and regulator _	151	ILVVDDQIENRQLMVNLLNSVGFDTQEAINGQEAVETNQRWQPHLIWMDLQMPVMDGKTALQQIKAVAHPPIVIALTANIFECDRTQALQDGFDGFVRKPFRTSEIWE
158340469	1.52146e+06	Acaryochloris marina MBIC11017	_ two-component hybrid sensor and regulator _	151	VLVVEDHQDTQEMLVNLLETVGFIVRSARGGLQAISLWQEWCPHLILMDWQMPEMNGYQTTQRIRQLE
158336393	1.51757e+06	Acaryochloris marina MBIC11017	_ thioredoxin reductase _	15	ILTIDDDPAVLQAIARDLRKQYGGRFRIMRADSGTSALDATQKLKLRGDTVALFLADQRMPNMSGVEFLEQASPIFPTAKRALLTAYADTDAAISAINDANLDYYLLKPWDPPE
158336699	1.51787e+06	Acaryochloris marina MBIC11017	_ multi-sensor histidine kinase _	15	IVCVDDEIAVLDSLRRELSEVFEDTCEIETAMGGKDAIALVHDLIEDECDLSVIIADYLMPDIKGDAVLQQVHQLSPQTLTIMLTGQANVDGISNAINTAQLYHYIAKPWQPEALQLTV
158337906	1.51908e+06	Acaryochloris marina MBIC11017	_ two-component hybrid sensor and regulator _	15	ILCVDDESTVLESLKIELRKSIGQDCAIETAQGGEEALEIVDELLEDEYEVAVVISDYIMPGMKGDQVLQRIHEKSPETITVMLTGQADVDAIANAVTHADLYRYIAKPWQADDLKLTI
158333247	1.51442e+06	Acaryochloris marina MBIC11017	_ PAS/PAC sensor-containing diguanylate cyclase/phosphodiesterase _	15	IICIDDDRLILNTLRDQLQRIIDDSYEIEVAESGGEALELFTELEADQIPIPLVICDQNLPDMGGDSLLSYLQIQYPKTRKILLTGEANLDAVINAVNSANLYRYIAKPWDETDLG
158337907	1.51908e+06	Acaryochloris marina MBIC11017	_ response regulator _	15	VLCVDDEKVILDSLKIQIKKELSDLCNVEAAINANEALEIVEELQEDGVEVVLVLCDWLMPGMKGDEFFVKLHQDHPNIIKIMLSGQADHSAIERAKEEADLHRFIHKPWRKSELIELL
158333249	1.51442e+06	Acaryochloris marina MBIC11017	_ response regulator _	15	ILCVDDESVVLRSLRDQISKYFGDQHTCEIAESVEEAWEVIDELKEDDVEILLIISDWLMPGTKGDEFLIELHQKFPEIVTVLLSGQADQSAVERIHQNMQLHAYISKPWNEEDLMGV
158336698	1.51787e+06	Acaryochloris marina MBIC11017	_ response regulator _	15	ILCVDDEVIILNSLLRQLQTAFDDHYIYETAENASEALELIEELQEENTDLLVIVSDWLMPGAKGDEFLIQVHQQFPGVVKILLTGQADEAAVERAQSQANLFNCLRKPWNESDLIQCI
158337175	1.51835e+06	Acaryochloris marina MBIC11017	_ two-component transcriptional regulator _	171	ILVIDDDPAIAELVAINLEMAGYDVAQATDGIKGQALAVQLLPDLIILDLMLPKVDGFTICQRLRRDQRTADIPILMLTALSQTQDKVEGFNAGADDYLTKPFELEEMLARV
158333593	1.51477e+06	Acaryochloris marina MBIC11017	_ two-component response regulator _	173	ILLVEDEVRIAQLVELELSDAGYQVNIAHDGQVGLELAQAIQPDAIVLDWTLPNLTGLEICQQLRATGNAVPIVFATAMDDQPHRQAAMAAGANAYVVKPYSISDLMETL
158336613	1.51779e+06	Acaryochloris marina MBIC11017	_ response regulator receiver domain-containing protein _	191	DNELYIQEVVQIALETINNWRVVTASSGAEGLLKAEKERPDAILLDMMMPDMDGATTFQKLQANPVTQTIPVLLLTAKIQTADQKRYQAMGVHSTIAKPFDPLQLPTQI
158334552	1.51572e+06	Acaryochloris marina MBIC11017	_ chemotaxis response regulator _	192	ILVVDDSKMVRMMVSTALQSAGYDVLEAADGQLAIEQVERADIQLIICDVEMPNMNGFEFLEYRCRQPAIMNLPVVMLSTCNSDQHRQLATTLGANAYLTKPYDESNLLATL
158336857	1.51803e+06	Acaryochloris marina MBIC11017	_ two-component transcriptional regulator _	1	ILIVEANPHLRSLLGWHLQQVGYFIHLSASIKQAQAAYQQHQPDLVIVDSELPDGLGQELCRWLQRQKHPLILMLSAQTTEADVVSGLKAGADDYVGKPFGMQEFLARI
158333980	1.51515e+06	Acaryochloris marina MBIC11017	_ two-component transcriptional regulator _	1	VLLVIDQPQLSRRLRDTFLAQGFYVTVVGDAEDAIAHCKTQPPALAMIDQQISEQSGVQLCRQLRAEGVSIPLLLLMEKDSREDRIVCLEAGADDYILSPHAGEVLLQRV
158338624	1.5198e+06	Acaryochloris marina MBIC11017	_ two-component sensor histidine kinase _	1	VLLIATNPSLIEQVNQYLSKQSLKVVVARSELEAAQKIILFKPQAIILQTLLTTGSGWDILSILQQRERDCPILLIGSTADCQQIT
158339404	1.52058e+06	Acaryochloris marina MBIC11017	_ two component transcriptional regulator _	1	ILIVEDEKEIAQLVRNMLETEGFICETLSNGADALRVVTVLQPDLVILDLMLPGLDGLEVCTRIRQQSLAKDPYILMLTARAEELDRIIGLTTGADDYLTKPFSPRELIARVR
158338366	1.51954e+06	Acaryochloris marina MBIC11017	_ two-component transcriptional regulator _	1	ILLVEDEENIRETIAPALQSEGYRVITAADGQTALDVIQLFKSRSQQASTLDLIILDIMLPGINGIDLCRFIRREGSTVPVLMLSAKDTEADRVVGLEVGADDYLTKPFGMRELIAR
158339052	1.52023e+06	Acaryochloris marina MBIC11017	_ two-component hybrid sensor and regulator histidine kinase _	202	LLVVDDNPTNRRILTLQAQTWGMGIQTVSGGAEALALLESDSKFDLAILDMQMPEMDGVELARHIRQLDQRKHLPLVMLSSLGQDEIIKHKQEIQFSAILNKPIQQSYLYDAL
158338408	1.51959e+06	Acaryochloris marina MBIC11017	_ two-component hybrid sensor and regulator _	202	LLIVDDNLTNRKILTKFANIWGMYSQAAPSGPAALELLRGRSSFDLAVVDMQMPEMDGLTLARRIHGLQKYKDLPLVMLSSLGVEAISTPMDKSLFYAILNKPIQEAQLSAI
158337906	YP	Acaryochloris marina MBIC11017	_001519082.1_ two-component hybrid sensor and regulator _	202	LLIVDDNPTNRKILTLQAKAWGMTSEAVPGGAAALALLTADHGFDLAVLDMQMPEMDGLTLAKRIREQLADFPLVMLSSLGKDELIQQQGNINFAAILNKPIQQSRLHDVL
158338777	1.51995e+06	Acaryochloris marina MBIC11017	_ two-component hybrid sensor and regulator histidine kinase _	202	VLIVEDNASTGQILCQQVQAWGLVPTLASSGLEALAWVKKERFDVAIADLQLPTMTWSRLLSELTQNHIHAPLPIIGLCAIGESAAVWQYQPLLSASLSKPVKQFRLYQT
158335372	1.51654e+06	Acaryochloris marina MBIC11017	_ two component LuxR family transcriptional regulator _	226	LLLVDDEPGLREAVQAYLEDSGFTVDVASNAKAGWELLQQRIPDLVISDIMMPEVDGYQFLAQLREDPRFMRLPIVFLTARGMTKDRIEGYNAGVDAYLSKPFDPDELVAIV
158334888	1.51606e+06	Acaryochloris marina MBIC11017	_ PAS/PAC sensor-containing diguanylate cyclase/phosphodiesterase _	262	LLLVEDDEDDYFFFEDLLDDFQSIQFDLDWADTYDKGLEAVQRHQHDIYVFDFRLGSRTGLDLLEEVVALGHRIPIILLTGQEDREIDLAAMTAGATDYLVKGMITSALL
158340812	YP	Acaryochloris marina MBIC11017	_001521980.1_ two-component transcriptional regulator/diguanylate cyclase _GGDEF_ _	268	VLVIDADTPSRDALATEARQHQIRYLTAESIDLARDLIQEQSPHLILFDPAGQSPIQSLTFLEALLYLPLPIPVLIWTADEERYQEMAKAYSSGQRPISKSLPLQQVWDR
158340640	1.52163e+06	Acaryochloris marina MBIC11017	_ hypothetical protein AM1_C0194 _	27	MLTALSDVVDRITGLEMGADDYVVKPFSLKELESRV
158339279	1.52046e+06	Acaryochloris marina MBIC11017	_ two component transcriptional regulator _	28	ILIAEDNPHIVDFLKAGLKAHGFTALVAEDGGQAANLACSDQFDLLILDLGLPRKDGLTVLREIRGQGELLPIIVLTARDGVDDTVQALERGANDYMTKPFRFEELLARIK
158341306	1.52233e+06	Acaryochloris marina MBIC11017	_ two-component response regulator _CheY_ _	28	ILLVEDEKRVASFIEKGLLKHGYCPTLVTDGEQALNQIYHESYDLVLLDLGLPIISGRAVLQTLRQQGFTLPIIVLTAYSEKKNLALGLGADGFIDKPFRFSELLEVI
158339458	1.52064e+06	Acaryochloris marina MBIC11017	_ response regulator _	28	VLLVEDEERIARFVEKGLLKHGYQSTLVTDGQQALDQANLEAFDVVLLDLGLPIISGWTVLQTLRQRGFTVPIIVITAFVDQDELALASGATDFISKPFQFSELIETI
158338636	1.51981e+06	Acaryochloris marina MBIC11017	_ two-component transcriptional regulator _	28	LLLVEDDERIAEALAEDLTDQHYAVDIAHDGEMGWELLEAFTYDLVLLDVMLPKMDGLAFCRQMRAQGLDIPVLMLTARDTTANKVDGLDAGADDYVVKPCELEEISARI
158334669	1.51584e+06	Acaryochloris marina MBIC11017	_ two-component transcriptional regulator _	28	LLLVEDDYPLAAVFAEALEDSGYIVDVVHDGEAGWYQATESEYGIILLDCMLPKLDGLGLCQRLRAHGYTIPILMMTARDASTDKVLGLDAGADDYLVKPVDLPELLARI
158336600	1.51777e+06	Acaryochloris marina MBIC11017	_ two-component transcriptional regulator _	28	ILLVEDDDRIAKPLAEDLRHQHYVVDVAADGESGWHYTQTADYELILLDLMLPRLDGISLCQQLRRSGYSGFVLMLTAKDTLTDKVMGLDAGADDYVVKPFELDELAARI
158340334	1.52169e+06	Acaryochloris marina MBIC11017	_ two-component response regulator _	28	ILLVEDQENIINELLNIFSQYNYIVDVVRDGELGWKYSTAFEYDLIIIDIITPKIDGISLCKKLRTEGYFTPILLLTEQGSLTAKINGLDAGADDYLVQPYHQAELISRI
158334732	1.5159e+06	Acaryochloris marina MBIC11017	_ two-component LuxR family transcriptional regulator _	2	LLLADDQALFRQGLASLLELEEDLSVVGQAQDGRDAILLTQTLQPDVILMDVRMPICDGVEATREIHQRFPWIRILVLTTFDEDEYIWTSLQAGALGYLLKSTPASQLAAAI
158339385	1.52056e+06	Acaryochloris marina MBIC11017	_ two component LuxR family transcriptional regulator _	2	ILVVEDHPVVRHGIIAILSQAEDMEVIAEAENGLEAINQYETHQPDITLMDLRMPHLEGVEAIARIRAKTSTAQIIILTTYDTDEDIYRGLQAGARGYILKDTTATELIQAIR
158340472	1.52147e+06	Acaryochloris marina MBIC11017	_ two-component LuxR family transcriptional regulator _	2	ILLVDDQYLIREGIASLLELEEDLEVAGMAANGKEAIKQAIDLKPNIILMDIRMPELNGVEATAKIKQSLPHCQIIMLTTFDDEELIVQSLLAGACGYLMKDIPPDDLGQAI
158338061	1.51924e+06	Acaryochloris marina MBIC11017	_ response regulator _	2	ILLVDDQKVIRQGLKALLESESDLQIVGLAENGKMGVSMAEQLQPDVVLVDMYMPIMDGAAATEIICQRCPDTKVLLLSSADDDKCIADALRAGAMGYLLKNASSEEVANAI
158338175	1.51935e+06	Acaryochloris marina MBIC11017	_ two-component LuxR family transcriptional regulator _	2	VLLVDDEDIVRYGLKAIAQGTPEIEIVGEAGSGKAAIAQAKTLQPDVILMDINMPQMDGVTATQEISRIQPHAKVLILTTHDEAEYLVEAMQQGAVGYLLKNTPPEDFIQSI
158333709	1.51488e+06	Acaryochloris marina MBIC11017	_ two-component LuxR family transcriptional regulator _	2	VMLVDDQGIVREGLSSLLNTKPDLEVVGEAENGQVALEKALEIQPDIILMDMRMPVMDGVAATQAIRQQAPQINILVLTTFDDEDYVSQAMRLGAKGYLLKDTPSDELAEAI
158338160	1.51934e+06	Acaryochloris marina MBIC11017	_ two component LuxR family transcriptional regulator _	2	VVIIEDHDLSRVGLTAALQHSGTVDVLGSAANGRQGLEMIQQYKPDVAILDIGLPDIDGIEVTLQLKQFQQADDSLQTKVLMLTANTSEDAVLAAFAAGADSYSLKEVSVEDLLSAI
158334639	1.51581e+06	Acaryochloris marina MBIC11017	_ two-component response regulator _	2	LLLVEDHALMRMGLKGQFSLESDFEVIGEAENGQQAIDLAAQLQPNIVLMDIELPILDGISATQKIKATCPDIRVLALSAFGKDNQVVGMLAAGADGYCLKSIDWQQLLAVI
158333495	1.51467e+06	Acaryochloris marina MBIC11017	_ two-component LuxR family transcriptional regulator _	2	VVLADDQPTFRQGLRTLLGFYQAQESFQFHIVGEAASADQAISLALEQHPTLLFLDLELPKDDGVAALQHLRQQNYTGKILVISAHQEDEWVFRAMRAGADGYVFKSQLAMNLHQAI
158337043	1.51822e+06	Acaryochloris marina MBIC11017	_ response regulator _	322	ILVIDDSKVIRMRVRDMLPEGDFQVLEAKDGAEGLNLIRQERPTLIMLDFLLPRVSGWEVYQELQNENDLQSIPLVIMSGRKEEVTDKLTEPFEFFEFIEKPFEKHQLQKAIK
158334970	1.51614e+06	Acaryochloris marina MBIC11017	_ two component LuxR family transcriptional regulator _	350	LLLIDDDPNLILLVKDYLELRGYEVTTAKNGREALRVLEKSIPNLIICDVMMPEMDGYAFVKRVRDNPQTSYLPVLFLSAKGQIQDRVTGLNTGADVYMIKPFEPDELVAQI
158337654	1.51883e+06	Acaryochloris marina MBIC11017	_ response regulator receiver, CheY-like protein _	35	ILVIEDEELVRANIAELLDAEEHDVVTAENGFLGALWAQEHLPELIICDVMMPELNGYEVLETLSENSDTAMIPFIFLTAMADKAEIRQGMTSGADDYLTKPFSRSELLEAVN
158338975	1.52015e+06	Acaryochloris marina MBIC11017	_ bacteriophytochrome _	40	VLLVEDNMLLALEMENLLESLGFSDIDTAPRVKQAIKLLDQKQYIMGILDINLKDENSFGVAEELIKRRIPFLFTTGYNSKFTLPESLATVPMLKKPIDGNQLNNTI
158335872	1.51705e+06	Acaryochloris marina MBIC11017	_ response regulator domain-containing protein _	42	MLADTDPIFRVGLKACLDAVADIQVVAEADDPAQVLQLFSTPLAEEASPEVDPQSLDLLILDISRVGDTEANGLLCQQLKGRYPNLALFVLSATIDPNQLTKLWQVGVEGFCRKG
158335939	1.51711e+06	Acaryochloris marina MBIC11017	_ response regulator _	43	VMVVDDSPTMRAMLTDMLQRNGLEVIEAEDGLAAKTMLQDSSYPDLVITDIVMPRMNGYELCRWVKNDLTDRNLPVIMCSTKGEAFDRHWGMKQGGDAYITKPFNPSEMLDLI
158337180	1.51836e+06	Acaryochloris marina MBIC11017	_ response regulator _	43	VLVVDDSITQRQLMSNALEDMGLTVLIATDGVEALEQIQSTQPDIVVLDIVMPRKNGYEVCREIKSNPTTQNVPVVICSSKTEDFDRYWGMKQGADAYLTKPIQPRELLVIV
158336874	1.51805e+06	Acaryochloris marina MBIC11017	_ response regulator _	43	ILVVDDLQSELDLLCQYLTEEGYTIVTATNGTEALEKVSQNKPDAIVTDWMMPEMGGLDLARKLRKNPDTADIPVVACTAKNRDVDRMWAAKQGVEAYVTKPCTKQELVSAL
158340766	1.52193e+06	Acaryochloris marina MBIC11017	_ response regulator CheY, putative _	43	VLVVDDSPAELKLMCLYLKEAGYLVISTDDAKEAVTKAETQKPDLVITDVVMPEMSGFELCRTLKKSEATQQLPVIICTTKNQDLDKLWGKKQGADEYVTKPYTREDFLKAVR
158334093	1.51527e+06	Acaryochloris marina MBIC11017	_ response regulator receiver _	43	VLVVDDGPAELELICSYLREGGYTVISTTDAKDALAKAESQKPDLVVTDVVMPGMSGFELCRSLKKNEATQQLPVVICTSKNQDLDKLWGKKQGADAYVTKPFTREDLLQAVQ
158334287	1.51546e+06	Acaryochloris marina MBIC11017	_ response regulator receiver domain-containing protein _	43	LLVIDDSAVDRLALVSMLQNLGHDVDECEGTENALRQIESGNYNLVFLDVVMPGQDGYKFLRSLRLNPTTADQYVVFCSSKTTPLEVNYGIKRAGANDYLTKPVTNETVEE
158340626	1.52162e+06	Acaryochloris marina MBIC11017	_ response regulator, putative _	45	IMIIDDSPLVIKQFDHLVRALGHQVVACQTPDNAVDKIQRVRPSMVFIDINMPGITGFELVKQIRQNSKIASIPLVILTGEQKLSNKWRAQWSACEFLTKPLGLDEIK
158334279	1.51545e+06	Acaryochloris marina MBIC11017	_ response regulator receiver _	45	IMIIDDSPILIKQFEHLVKVLGHQVIACQESERAVDKIQQVKPSMIFIDINMPGITGFELVKRIRQQNRISTIPLVILTGEQKLSNKWRAQWSGCEFLTKPLGIAEIK
158334811	1.51598e+06	Acaryochloris marina MBIC11017	_ response regulator receiver domain-containing protein _	45	VACVDDSQTIQQFVKLSLEAEGFEVLQLMDPKQALTVLIEQQPNVILMDIEMPKMDGYELCRMVRQVDMLKEIPVVMLTGREGLIDRMRARMSGCTAYLTKPFNPQELLALV
158338187	1.51936e+06	Acaryochloris marina MBIC11017	_ hypothetical protein AM1_5080 _	45	ILSVDDSLVVQTMIKRAIGDHYKVLTANSAIDALQVLNNNSNSVELLLLDVTMPDVDGFELCRTVRSIPQFQNLPVIMLTAKDGLLNKVKGQMAGSTHYLTKPVEKETLLNAI
158334092	1.51526e+06	Acaryochloris marina MBIC11017	_ response regulator receiver domain-containing protein _	45	IACVDDSPAILNTINRYLQDQNVSVVMISDPVKALIQIMRAKPDLILLDVGMPWVDGYELCRLIRKNSQFKKIPVVMVTGNTGLIDRAKAKVAGATDYLTKPFTQADLQKMV
158336875	1.51805e+06	Acaryochloris marina MBIC11017	_ two-component response regulator _	45	IVCIDDSPTILSEIERFLGNTRYEVTTVDDPIQASSVIFRIKPDLILLDITMPKINGYRLCSLLRSSAVFDETPIIMVTGNTGLIDKARAKLAGATDYFTKPFTQQGLTDVV
158336973	1.51815e+06	Acaryochloris marina MBIC11017	_ response regulator receiver domain-containing protein _	45	INQSKLTQRYVTQVLEPSGYDVMRLSDSIRALPALLKRPPVLALVDAELPHLDGYQLCRMVHRRESLREMPVIIMAPKRGMCDVIRTRLSGAMACLGKPFHHQELLALV
158338188	1.51937e+06	Acaryochloris marina MBIC11017	_ hypothetical protein AM1_5081 _	45	ILSVDDSVVVQTMLKRTLCEYYRFLTASNAVEALNLLNRYPIELMLLDVTMPDIDGIEFCKTVRGISKFRDLPVIMLTAKDGLIDKVKGQMAGSTHYLTKPVRKEKLLNVI
158336871	1.51805e+06	Acaryochloris marina MBIC11017	_ two-component hybrid sensor and regulator _	47	ILVVDDSVNVRRFLALTLEKAGYQVEQAKDGQEAVDKLESGLAVQAVVCDIEMPRLDGYGVLEEVKGQLQFEDLPIVMLTSRSHEKHRKVAMNLGASAYFSKPFNEQELLDTL
158334283	1.51546e+06	Acaryochloris marina MBIC11017	_ chemotaxis histidine kinase _	47	ILVVDDAALMRRRLESSLNTYGFATFTCSDGQEAWQWLQANGAPDMMITDVEMPNMDGFTLIDRCRQSNMEMPILVVSSRLSEEWGKEAERLGANDYLNKGFSTPELINCV
158334097	1.51527e+06	Acaryochloris marina MBIC11017	_ CheA signal transduction histidine kinase _	47	VMVVDDSVNVRRFLALTLEKAGYRVEQAKDGQHALEKLESGLPIQAVVCDIEMPRMDGYGFLAHVKAKPNLKSIPVAMLTSRSGDKHRKLAMTLGASAYFSKPFREKELLQTL
158337177	1.51835e+06	Acaryochloris marina MBIC11017	_ two-component hybrid sensor and regulator histidine kinase _	47	VLIVDDSITVRELLSMTFNKVGYRVEQARDGQEAWEKLRSGLPCDLVFCDVEMPRMDGLELLSRLQQDDDLQDLPVAMLTSRGAARHKQMATELGAKGYFTKPYLEEVLLEA
158334014	1.51519e+06	Acaryochloris marina MBIC11017	_ response regulator _	63	ILIIDDEQAIQAVASLSLKMEADWQVITANSGAEGIAIAGQEQPDAILLDVMMPMLDGIETFKQLQQGPLTRSIPVILLTAKAQAAEQQQFQSLGVAGVITKPFNSLTLA
158340334	YP	Acaryochloris marina MBIC11017	_001521690.1_ two-component response regulator _	63	VIIIDSDEDWLCSIPNVIKQKGYTATTLADDSQFWTVLEVIHPDALIIEYKSPQIDSTEICRLIRNHPYWNYLPILLLVDGLKVENQNLLYQVGADDILFKPISSNELANRI
158333448	1.51462e+06	Acaryochloris marina MBIC11017	_ two-component hybrid sensor and regulator histidine kinase _	64	VLLVDDNDTNQRVLTLQTESWKMKPQVAASGYEALGLLEHAGPFDIAILDMQMPEMDGLTLAQKIRSHPRGVNFPMVMLTSIGQAPDLAHHKGLFSAWLNKPIKQSQLYSAL
158339053	1.52023e+06	Acaryochloris marina MBIC11017	_ two-component hybrid sensor and regulator _	64	LLIVDDNATNREILSLQAQSWGMLTCAVKSGIKALEWLQRGVNFDLAVLDMQMPEMDGVTLAEKIRAEPNGKTLPLVVLSSLGQDDIRARAGDINFSAILNKPVQQAQLQS
158338793	1.51997e+06	Acaryochloris marina MBIC11017	_ two-component sensor histidine kinase _	64	VLIVDDNVTSRRLLTQQTIDWGMKPKSANSVEDALKMLQNVPEPFDVAIIDWQMPQKDGGVLAQEIRNRSALASMPLIVLSTVIDSKLKA
158333513	1.51469e+06	Acaryochloris marina MBIC11017	_ two-component hybrid histidine kinase sensor and regulator _	66	VLLVEDNPGDAFLIQGMLGVKRSEDAVQYEITHVDKLEDALQTLAKKDFNVVLLDLSLPDSHGLTTLEKVVAQSPVLPIVVFTGLDDETVAMQAVQQGAQDFLVKGQVTPGSLIHA
158338091	1.51927e+06	Acaryochloris marina MBIC11017	_ PAS sensor diguanylate cyclase _	66	ILIIEDDDQDVEIVRKLLSLNKSAITLKHRRTLSTGITFLHEVNSIDLVLLDLCLSDTQGLETFHKIHEMFPSLPLVILSGNTDETIAIEAMQDGAQDFLVKG
158338089	1.51927e+06	Acaryochloris marina MBIC11017	_ response regulator receiver modulated diguanylate cyclase protein _	66	ILMIEDDEQDVEIIRELLEGRHSFPAALEHRSSLAEGIARLHHEPAIDLVLLDLSLTDASNLEAFQHIQLVFPEMPLIILSGNLDPSRALYLLQKGAQDCLFKG
158337002	1.51818e+06	Acaryochloris marina MBIC11017	_ EAL domain-containing protein _	66	ILMIEDDIQDVEIVTRLLGKEKQSSIMLNHCPTLHAGLDTLREQSKIDLVLLDLSLSDAQGLETFRKIHEAFPNIPLIILSGNSDERIALEAMQQGAQDFLVKG
158338090	1.51927e+06	Acaryochloris marina MBIC11017	_ diguanylate cyclase/phosphodiesterase _	66	VLIIEDDEQDANIVRRYLDNMPQLPLILQHKHTVREGIHVLQNNDFIDLILLDLTLSDAKGLDTFHQIHQAFPQKPLIILSGNSNPEIIKKTLHEGAVDFLIKG
158333756	1.51493e+06	Acaryochloris marina MBIC11017	_ diguanylate cyclase _	66	ILMIDDDEQDVEIVRELLSISHDFPVDLLHCSDLASGFELLESEIEIDLVLLDLCIAGTVGLDLFHQVNRAFPLTPVIILSGNSDEAVALKAMQEGAQDYLVK
158338715	1.51989e+06	Acaryochloris marina MBIC11017	_ PAS sensor diguanylate cyclase _	66	LLNHREGIDLILLDLCLSDAQGLETFYQVHQAFPAKPLIILSGNTDQSLVEEALQKGALDFLVKG
158339431	1.52061e+06	Acaryochloris marina MBIC11017	_ two-component hybrid sensory histidine kinase _	69	VLIVDDDPEVHEATILACGSFEFEYRPLNLLSAYSGAEAKTVLHDHPDIALLLLDVVMETSQAGLELVKYVRKTLNNQIIRIILRTGQPGEAPELDVIRDYDINDY
158336700	1.51787e+06	Acaryochloris marina MBIC11017	_ diguanylate cyclase _	69	VIVVDDEEQVHEVTRLALKNFKFADKPLEIISAYSSEEAQQLLNQNPDTAVLLLDVVMETDEAGLELVKHIRDHLHNIFVRII
158338183	1.51936e+06	Acaryochloris marina MBIC11017	_ response regulator receiver _	6	VVLVEDSAVALQILSRLLDSAPEVNVVGTAQDGNEGLRVIAQTMPDVICTDLQMPNMDGLEFTEKVMKDFPRPILVISNSVHPSDVDNIFNLMQAGALDFFPKPN
158340839	1.52201e+06	Acaryochloris marina MBIC11017	_ two-component hybrid sensor and regulator _	87	VLVVDDEAPIREVAQSMLVKHNYQVMVAADGIDAIAQYAQHHTEIDVVLMDMQMPTLSGETTIQTLRKINPQLKVIVTSGLLVDETFALSLGQCVKAFLQKPFSSDTLLRML
158333299	1.51447e+06	Acaryochloris marina MBIC11017	_ diguanylate cyclase _	8	ILIVDDVPTNLTILAQTLRDQGFTVWVATSGNAALKQLAHGLPDLILLDIQMPGMNGLETCAKLKADLRTQDIPVIFMSALSEQANKVEGLSLGAVDYITKPFQEAEVLARVK
158339629	YP	Acaryochloris marina MBIC11017	_001521018.1_ response regulator receiver, CheY-like protein _	8	ILMVDDEPKNLALLTDVLEQEGYEIWQADSGAEALRVAGMVLPDLILLDINMPDMQGYDVCQQLKANAKTKLIPVIFVSALDETWDKVKAFSVGGSDYINKPIQIVELMARM
158339378	1.52056e+06	Acaryochloris marina MBIC11017	_ response regulator _	8	ILIVDDNLNNLKVLVGILSDSPYKIRRAVTGDIALQCITAAPPDLIMLDIILPDFSGYEICAKLKQDPETASIPIIFMSALSSNADKVKAFTVGGADYITKPFESTEVKARI
158339007	1.52018e+06	Acaryochloris marina MBIC11017	_ hypothetical protein AM1_5925 _	8	ILVVDDSAENLRILSSMLTEEGFAVRCARSGLMALTTLQNTRADLILLDIKMPQMSGYEVCEHLKADP
158340437	YP	Acaryochloris marina MBIC11017	_001521793.1_ response regulator receiver, CheY-like protein _	8	ILMADDEPKNLALLTDVLEQEGYEIWQADSGAEALRVAGMVLPDLILLDINMPDMQGYDVCQQLKANAKTKLIPVIFVSALDETWDKVKAFSVGGSDYITKPFNTLEVIVRI
158338729	1.51991e+06	Acaryochloris marina MBIC11017	_ diguanylate cyclase _	8	ILLVDDQPQNLRLLTDVLEEQGYEVLQALNGNVALQAVSLDQPQLILLDIQMPEMDGYTVCQKLKADPSTQDIPVVFVSALDESWDKVKAFSVGGVDYITKPFKVVEVLARV
158340437	1.52179e+06	Acaryochloris marina MBIC11017	_ response regulator receiver, CheY-like protein _	8	VDDQPNIMNLLTSIMEQDEYEVWQASSGAEGLQMAAKVLPDLILLDVNMPDMDGYTVCQQLKADPQTTAIPIIFVSALDETWDKVKGFSVGGSDYITKPFNTLEVIVRI
158338315	1.51949e+06	Acaryochloris marina MBIC11017	_ diguanylate cyclase/phosphodiesterase with response regulator _	8	ILIVDDTPHNLQILSTALTKQGYQVRGAANGSMALIGARNIMPDLILLDIKMPEMDGYTVCERLKSEALTQDIPVIFISALDDALDKVKAFTVGGVDYITKPFQLAEILARV
158334668	1.51584e+06	Acaryochloris marina MBIC11017	_ two-component sensor histidine kinase _	8	ILIVDDNVDNLNVLAGMLAEQNYKVRRAINGSIALRAIKASIPDLILLDIVLPDMTGYDICTQLKQHPSTQDIPVIFISSLNDTEDKVKAFAVGGVDYVSKPFEMAEVCARI
158339429	1.52061e+06	Acaryochloris marina MBIC11017	_ signal transduction histidine kinase _	8	VLIIDDNPNNLGVALSALEGFGATVLVSRSGESGLQRAAFAKPNIILLDVLMPDIDGYETCRRLKANPQTEPIPVIFMTALTSNNDKVKGLEVGAVDYITKPIYVDELLARVK
158340437	YP	Acaryochloris marina MBIC11017	_001521793.1_ response regulator receiver, CheY-like protein _	8	ILMVDDEPKNLALLTDVLEHDGYEIWQADSGSEALRVAGMVLPDLILLDINMPDMQGYDVCQQLKANAKTKLIPVIFVSALDETWDKVKAFSVGGSDYINKPIQIVELMARM
158336379	1.51755e+06	Acaryochloris marina MBIC11017	_ two-component response regulator _CheY_ _	92	ILLVENEGDLGQAIKQVLVGEKYVVDWVTDGAQAWHCLESRWTDYTVAIFDWLLPELSGLELCQRLRDRQNPLPILMLTALGQPENRIAGLDAGADDYLMKPFIMEELLARL
158338976	1.52015e+06	Acaryochloris marina MBIC11017	_ response regulator reciever protein _	92	ILIFEDDLILAESWHKTLSAQGHQVEHTTNVDTAMSKIYEGYLDIAFIDIFIQKNNQESLRGGILLISKINMLSLGYKPWLIAISGRSHDPSCSVLEIAKTVGADEYLKKPIDLEELIAAVE
158336595	1.51777e+06	Acaryochloris marina MBIC11017	_ two-component transcriptional regulator _	92	VLLVEDEPDLGAAIQRTLTQEAYIVDWAKDGREAWGYLESQWTQYTLAIFDWLLPGLSGIDLCQRLRAQQSPLPVLMLTAKDQPEDTATGLDAGADDYLVKPFRKIELLARL
162448137	1.62127e+06	Acholeplasma laidlawii PG-8A	_ OmpR family response regulator _	1	EDDVQISYIIQKTIINAGYEQQGFMKGKDFLEAVRKKAPDLVLLDVLLPDMSGLEVLAKLREFYKELPVIMLSALDTEMDKVKALDLGADDYMSKPFGILELTARM
162446897	1.62003e+06	Acholeplasma laidlawii PG-8A	_ two-component response transcriptional regulator _	1	FVEDEVNISEIIRKYLTRENYDVTVFYDGETAMEHVGDPVDLWILDIMLTGEIDGFDLIKAISKANPEAAVIFTSARDQALDKIKGLELGSDDYIAKPYSPKELMLRV
162448256	1.62139e+06	Acholeplasma laidlawii PG-8A	_ LuxR family two-component response regulator _	5	AICDNEQVFLDYYQSKLESVARKLKIDLDIHRFSSGEALLFHLDDYPNQFQIIYLDIVMGGINGIETALKVRKLNSVVKIIFLTSSTDYVFNAFDANASHYLIKDLHDDK
148259467	1.23359e+06	Acidiphilium cryptum JF-5	_ two component transcriptional regulator _	10	ILVVEDDKDVGGFVVKGLREAGHTVEHADNGRDGLFMAASENFDAIILDRMLPGGIDGLRLLETLRAQDNVTPVLFLSALGEVDDRVKGLKAGGDDYLTKPFAFAELLARV
148259330	1.23346e+06	Acidiphilium cryptum JF-5	_ two component transcriptional regulator _	10	ILLVEDDELTANLVRAALGAEGHLVAVAADGRDGLLRAAAGHEGRAWDLLIVDRMLPGLDGLALVRTLRGAGLSMPALFLTALSGIDDRVEGLRAGGDDYLVKPFAAAELAARV
148243637	1.21988e+06	Acidiphilium cryptum JF-5	_ two component heavy metal response transcriptional regulator _	10	VLIVEDEAKTAAYLRKGLEENGFTADVATDGETGLEFARHGGYDAIILDIMLPRRNGFEILDEIRRRDSQTAVLLLTARDQVTDRVAGLEAGADDYLVKPFAFSELLARVR
148261169	1.2353e+06	Acidiphilium cryptum JF-5	_ two component transcriptional regulator _	11	ILVVDDDREIRELLARFLERQRFRVTAVRDAREARRAYLNGHYQLVVLDLMLPGESGIDFARWLRGESQVPIIMLTALGEEPDRIIGLELGADDYVTKPFNPRELVARIR
148259863	1.23399e+06	Acidiphilium cryptum JF-5	_ two component transcriptional regulator _	11	ILLVDDDARLRALMQRYLVENGFRVTVAESAAAARETLRVVDPDMMVLDVMMPEETGLELIESLRADRAPDLPILLLTARGAPEDRIAGFEAGADDYLGKPFDPRELLLRI
148260472	1.2346e+06	Acidiphilium cryptum JF-5	_ two component sigma54 specific Fis family transcriptional regulator _	126	ARIAAARGATLAQAETVDAALECLRADARTDLIICDVTHDFGALMRRLAAERFTTAVVAAGAENDEKAAVDAIRAGAREYLPLPPDSDLIAAI
148261933	1.23606e+06	Acidiphilium cryptum JF-5	_ two component transcriptional regulator _	12	VLVVEDEAPLVTLLRYNLEKSGFRVDEAGDGGEALGRINEAMPDLVLLDWMLPTMSGIEVCRQLRRKPSTRHLPVIMLTARAEDQDTVRGLETGADDYITKPFSPEALIARIR
148259593	1.23372e+06	Acidiphilium cryptum JF-5	_ two component transcriptional regulator _	147	ILIVDDDPQIRTMLRRYLAGEGYGTREADSEAGTHAALLGGDVTLVLLDLMLGGEDGLALARAIRARSDVPIIMLTGKDDVIDRVAGLEAGADDYIAKPFHLREVLARI
148259594	1.23372e+06	Acidiphilium cryptum JF-5	_ PAS/PAC sensor hybrid histidine kinase _	16	VLVVEDDPAVRRVAERRLARLGYSTIDAATGAAGIAALEAHPEIAVLFTDIVLAGGMSGLDLAIAARAARPELPVLFTSGYGDPIVLKGRALPAGAIWLQKPYAEAALANAL
148259776	1.2339e+06	Acidiphilium cryptum JF-5	_ PAS/PAC sensor hybrid histidine kinase _	16	ILVVDDEPGLRTLLADMLREQGFSVRMAADAEAALAILRAEPDIDLLIADIGLPGAMNGRQLALAARADRPELPLLFVTGLDETTSSGPPFDSAPTAMLRKPFSFGCL
148244000	1.22024e+06	Acidiphilium cryptum JF-5	_ two component transcriptional regulator _	19	VLVVDDEPQIHRFLKPALEAAGYVVLRAERGAEALRLAATMVPDVILLDLGLPDLDGQDVIVKLREFSDVPVIVLSARDQEAQKIAAFDAGANDYVEKPFGLGELLARI
148259727	1.23385e+06	Acidiphilium cryptum JF-5	_ two component transcriptional regulator _	19	VLVVDDEPQIHRFLKPALEAAGYVVLRAERGAEALRLAATLVPDVILLDLGLPDLDGQDVIVKLREFSDVPVIVLSARDQEAQKIAAFDAGANDYVEKPFGLGELLARI
148260878	1.23501e+06	Acidiphilium cryptum JF-5	_ two component transcriptional regulator _	1	IALVDDDRHILESVQMTLEQEGFAVRTYTDGESALQGLMTRPADLAVLDIKMPRMDGMELLQRLRARSAMPVIFLTSKDDELDELMGLRLGADDYITKPFSQRLLLERI
148261690	1.23582e+06	Acidiphilium cryptum JF-5	_ response regulator receiver protein _	23	ILTVDDSRTMRDMLRMSLVEAGFRVVQAEDGVHGLEVLQAETPDVIVTDINMPRLDGFGFIEAVRRDASWRSTPMLVLTTEVDPEKKARAKAAGATGWIVKPFDPVKLVDAIR
148243694	1.21993e+06	Acidiphilium cryptum JF-5	_ signal transduction histidine kinase with CheB and CheR activity _	24	ILLIEDDPDLRRLLVQFLEGMGHRIEAVPDGPAAMARVATSDFRPDLILTDYNLPSGMSGTEAVTALRKRLDAPVASLILTGEISSETLAEIEQHGAVRLNKPILPGELAAAI
148260824	1.23495e+06	Acidiphilium cryptum JF-5	_ two component transcriptional regulator _	58	DNRDVLTTFFKSKLVVVDETTDIEEALDLTRFYEYDAVVLRVTDTRPAEIELIRRLRLAGLRCPIMAVAHLLSEATRLRILEAGVDDLIVSAISHEEIFLRV
148261026	1.23515e+06	Acidiphilium cryptum JF-5	_ nitrogen metabolism transcriptional regulator NtrC _	68	ILIADDDRSIRTVLTQALGRSGYQVRTTSSAATLWRWVEDGEGDLVITDVVMPDENGLDLVPRIKRIRPEMPVLVMSAQSTILTAVQSTQRGAFEYLPKPFDLGELLAIV
148261694	1.23582e+06	Acidiphilium cryptum JF-5	_ chemotaxis-specific methylesterase _	6	VLIVDDSATMRGVISASLRRDPEIEVVGEAGDPYEARSAIKELNPDVITLDVEMPNMNGLDFLEKIMRLRPTPVIMVSSLTSEGAQVTLQALEAGAFDCVPKPS
148261695	1.23582e+06	Acidiphilium cryptum JF-5	_ response regulator receiver protein _	7	VLVVDDQQTIRSLARVGLEALGIGEIVEAEDGEEALKLLLTRKTPIHLVISDYNMPKFNGLSLLRAVRAHGPISKTAFIMLTGRADKQMVMTAVEHGVNNYLIKPFTTESLKEKI
148261796	1.23592e+06	Acidiphilium cryptum JF-5	_ two component transcriptional regulator _	81	ILVVDDDLALRSTLCEQLRAEDEFAPSEAGSIVEAERMIASAEQRFDAIILDVSLPDGDGRSFCARLREEGIKVPIIMLTGSAAEQDVVRGLDSGANDYVAKPFRLAELMARL
148261028	1.23516e+06	Acidiphilium cryptum JF-5	_ two component sigma54 specific Fis family transcriptional regulator _	83	ILIIDDEPDIRLLVEAILQDEGYTTRNAGNSDEALAAFRDRRPSLVVLDVWLQNSPLDGIDLLKVMKAEAEDVPVVIISGHGTIEMAVNAIQHGAYDFIEKPFKSDRLLL
148261940	1.23607e+06	Acidiphilium cryptum JF-5	_ two component sigma54 specific Fis family transcriptional regulator _	91	LLIVEDDPGLRRQYRWAFPGRTVLVAGDRDQAIDQARRARPEVAIIDLGLPPDPDGISEGLAILDALFRELPAIKVIVATGNGRRENALLAIGRGAHDFFEKPVDIEILR
148243694	YP	Acidiphilium cryptum JF-5	_001219934.1_ signal transduction histidine kinase with CheB and CheR activity _	9	IIDDDKPIRDSLSALLGKHGWQVAAYVSAEDFLRDGCQLSHACLLLDARLPGMSGIDLLKLLRKEANETPVIIMTGQGNVQQAVMALHAGAADFIEKPIAVADLLA
218666606	2.42763e+06	Acidithiobacillus ferrooxidans ATCC 23270	_ transcriptional regulator OmpR, putative _	11	ILLVDDDPRLRTMLVRYLEGQGFIVHAAASGVQMDRQLEREYYDLLLLDVLMPGEDGFSICQRLRVQEPHLPIIMLTARGDLADRVQGLDVGADDYLSKPFEPQELVARIR
218665227	2.42671e+06	Acidithiobacillus ferrooxidans ATCC 23270	_ DNA-binding response regulator _	11	VLIVDDDRRLAEMLREFLQAQGLAVLLAANGQQMRQQLAAGPVDVIVLDWMLPGQDGISLAKDLRSKAGPPILMLSARGEEDERILGLESGVDDYLAKPFNARELLARL
218665852	2.42586e+06	Acidithiobacillus ferrooxidans ATCC 23270	_ DNA-binding response regulator PhoB _	12	VLVVEDEEGIQELLRVTLQRNGFDVRCEGSVESAEAVLQTWGPQLLVLDWMLPGKNGLAWCRMLRRREETRKLPIILLTARGEEGDRVHGLESGADDYLAKPFSPRELVARVN
218665314	2.42644e+06	Acidithiobacillus ferrooxidans ATCC 23270	_ DNA-binding response regulator _	13	ILLVEDDRMIGEAISVALRDAAYAVDWVRDGETALRAIANQEHQAIFLDLGLPKLDGCTLLQRVRAGGNSLPIIIISARDALADRVEGLDLGADDYLVKPFAMGELLARL
218665909	2.42519e+06	Acidithiobacillus ferrooxidans ATCC 23270	_ hydrogenase sigma-54 dependent DNA-binding response regulator _	15	RNLSWALSIHYECIIVSSGAEALGLASTHHVDAIICDAQLEDMSGTQCLFDFRTRQPTAIRFLCGLGTDSGEFADALHVAAVYEYLRKPLFP
218666191	2.42573e+06	Acidithiobacillus ferrooxidans ATCC 23270	_ DNA-binding response regulator _	15	QEARNLSWALSIHYECIIVSSGAEALRLAGTHHVDAIICDAQLEDMSGAQCLFDFRTQQPTAIRFLCGLGTDSSEFADALHVAAVYEYLRKPLFP
218667388	2.42663e+06	Acidithiobacillus ferrooxidans ATCC 23270	_ DNA-binding response regulator KdpE _	19	ILLVEDDPSIGGFLQAAMDREPGYRLYWETTLKDAWRAWEKRQIQEGRPFALVLLDLGLPDGDGQGLIRRLRDHGGEQALIIVISARGGEADKVQALDSGADDYLTKPFTIGELLARL
218665330	2.42462e+06	Acidithiobacillus ferrooxidans ATCC 23270	_ DNA-binding response regulator _	27	ILVVDDDLRLRGLVESHLQGFGFGVRGMSDGRQIESLLAEAPVDLIVLDLGLPHEDGLQICRRLRQHHDVPILMLTARGDEVDRILGLEMGADDYLAKPFHPRELVARIQ
218667003	2.42727e+06	Acidithiobacillus ferrooxidans ATCC 23270	_ nitrogen regulation protein NR_I_ _	29	VWIIDDDPSIRWVLEKALTQADILVRSFADADSALRALGREQPGAVVTDLRMPGLDGLAFLREVQSRWPKLPVIVMTAHSDLDNAVAAFQSGAFEYLPKPFDMDEAVTLV
218665053	2.4275e+06	Acidithiobacillus ferrooxidans ATCC 23270	_ DNA-binding response regulator _	32	MVVDDDVTFCRVLSNAFSRRGFEVCTVHDSADIIAVAELYVPDAVVLDLRMPGVSGLEMISPLRSINQDIRILVLTGYASIATAIEAIKLGAVYYLTKPADADEIIARL
218666460	2.42454e+06	Acidithiobacillus ferrooxidans ATCC 23270	_ sigma-54 dependent transcriptional regulator/response regulator _	37	ILIVEDEKNLRSVLAATLEAEGFSTAQTESAEDALAIMARELPVLVLTDQRLPGMSGTELLARIKERWPRTPVLIATAYGEIEQAVQAIKAGAEHYLTKPVDEGELVAII
218668014	2.42494e+06	Acidithiobacillus ferrooxidans ATCC 23270	_ sigma-54 dependent DNA-binding response regulator _	37	ILTIDDDPDFLRLLGLWLESEGYHVLASSDPVQGMQTLQTARPDLVITDLRMPGMDGMAVLETVQALDPDLPVILLTAHGSIPNAVAAMRAQAFGYLSKPFSNEELQE
218665148	2.42454e+06	Acidithiobacillus ferrooxidans ATCC 23270	_ nitrogen assimilation regulatory protein NtrX, putative _	41	ILVVDDEPDICATLAEILEDEGYGVHTAGSAEAAEVLLREQMVDLVLLDIWMPGEDGVSLLRRWAETGLAQPVVMMSGHATIETAVQATKLGAYDFIEKPLSLDKTL
218667563	2.42469e+06	Acidithiobacillus ferrooxidans ATCC 23270	_ type IV fimbriae expression regulatory protein PilR, putative _	95	LIVDDEPGIVELLGITLQGMGIAVTGAYSLAEARARLAEGAPSLCLSDLRLPDGSGLDLVRRLRELYPQVPVAVITAYSSADGAVEAMQAGAFDYMAKPIELARLRR
218666097	2.42732e+06	Acidithiobacillus ferrooxidans ATCC 23270	_ sigma-54 dependent DNA-binding response regulator, putative _	99	ILLVDDDADLLRLLSLRMKAAGYVVSTAASGSEALSVLAMEHPSLVITDLKMDEMDGMALLDAIRRDYPTLPVIILTAHGSIPDALLAADQGVFAFLTKPFDGKDLMAQV
117927726	872277	Acidothermus cellulolyticus 11B	_ two component LuxR family transcriptional regulator _	100	VFLVDDHEVVRRGLTQLLEAESDIRVAGEAGTAAEALARVPAVRPDVAVLDVRLPDGDGVEVCRELRSALPGLACLILTSFADDDALYRAILAGASGYVLKQIRGNEIVSAVR
117927267	871818	Acidothermus cellulolyticus 11B	_ response regulator receiver modulated serine phosphatase _	149	ILIVEDDDANAALVADYLAPAIPGVSRVATFHEARRFLADVPIDCVILDLTLPDIDGFDAVREIHDFAPDVAVVVLTDDGDEHGGMTAMAAGAQDYLVRTE
117928403	872954	Acidothermus cellulolyticus 11B	_ two component transcriptional regulator _	19	VLVVDDEPAIVRALRINLTARGYEVYTAFDGRTALQLVTAHKPDLMILDLGLPDMDGIDVIGGVRGWSTMPILVLSARDQEAQKVKALDAGADDYVTKPFGMDELLARL
117928813	873364	Acidothermus cellulolyticus 11B	_ two component transcriptional regulator _	19	LLLIEDDPAIRTTLTRSLTEKGHAVASAPSAMTGLQAVVAEAPDLVVLDLGLPDLDGGTLIQMVRAVSKVPIIVATARDDEREMVRILDAGADDYVVKPFASDHLEARI
117927299	871850	Acidothermus cellulolyticus 11B	_ two component transcriptional regulator _	1	LLVIEDEESFSETLAYMLRREGFVVHTAGSGTEGLELFERQGADLVLLDLMLPGLSGTDVCRRLRERSNVPIIMLTARDSEVDKVVGLELGADDYVTKPFSSRELVARIR
117928972	873523	Acidothermus cellulolyticus 11B	_ two component transcriptional regulator _	1	VLVVDDDTALAEMLGIVLRGEGFEPHFVFDGDKALAAFREVKPDVVLLDLMLPGTDGIDVCRQIRAESGVPIVMLTAKSDTVDVVVGLESGADDYVVKPFKPKELVARL
117928992	873543	Acidothermus cellulolyticus 11B	_ response regulator receiver protein _	23	ILVVDDSRAMRRIIERMLVLAGYDHHDIVHAADAVEATRLMAEQPPDLILCDWNMPGTNGLEFLTAIRRAGWTTPFGFITSEASPAMREQALAAGALFLIAKPFTPEEFHAAL
117928967	873518	Acidothermus cellulolyticus 11B	_ two component LuxR family transcriptional regulator _	2	VLVADDHALFRRGLEMVLRQEPDIQLVAEASDGAEAVARAAETLPDVVLLDVRMPKRTGIEACAAIKEVCPSAKIIMLTISDEEADLYEAIKAGAMGYLLKEISIDEVAAAI
117927404	871955	Acidothermus cellulolyticus 11B	_ two component LuxR family transcriptional regulator _	2	VLMADDQHLVRGALATLLALESDIEVVAEVGRGDDVVEAARRTAADVAVLDIEMPGLDGLAAAAALRREVPDCRVLIVTTFGRAGYLRRAMEAGVSGFLVKDAPVERLVDAVR
117927471	872022	Acidothermus cellulolyticus 11B	_ response regulator receiver protein _	2	VVVADDAAGMRALLATLLSIEPDFDVVGVARDGAEAVDLVLREQPDLLVIDITMPVMSGTEAIRRIREANPRVRVAVLSGERQPLPPGADAILVKGTVNEELIAV
117927574	872125	Acidothermus cellulolyticus 11B	_ two component LuxR family transcriptional regulator _	2	LIADHHERLRNTLRRYVAAVPGIDRVAMAGNSAETFFRYTIERPSVVFLDIDLPELGGPQTARELVSAHPDANVVMLADRPDHERLAEAMAGGARGYLTRNVSVEELCAAL
117929307	873858	Acidothermus cellulolyticus 11B	_ PAS/PAC sensor hybrid histidine kinase _	31	VLYIDDNDHDDGVLRHIVALRPGIRWLRAECGSKGMELLRRESVDLVFLDVHLPDMSGFDVLREVRSDPLTAALPVYMVSADATSGQAQRMSSLDATGFVPKPVDVPRLLG
117928181	872732	Acidothermus cellulolyticus 11B	_ two component LuxR family transcriptional regulator _	3	VLLVDDHDLIRQGLRRAFERAGDFTVVGEAGSVAEALACATRHQPDVVVIDVRLPDGSGLDVARELRRQRPDVGIVVLTMYAGDEQLFGALEAGASAFVAKDAPAEDVVSA
117928597	873148	Acidothermus cellulolyticus 11B	_ two component LuxR family transcriptional regulator _	3	MVVDDHPLVRESMVSRLTAMGAREVIEAASCAEARARARSVGPCDVCIVDVGLPDGSGLDLIAELRAAGWPRLVVLSAADDPYSVRAAFVAGAQGYLLKSASP
117929081	873632	Acidothermus cellulolyticus 11B	_ response regulator receiver protein _	43	VVIADDSPTLRRIVTSVLTKEGYEVITAEDGVEAVQAVFRSRPDAVILDVQMPRVSGYVAARLLKDDWQTADIPIILLTSLDAASDRYWGTQAGADRYLTKDFEAPELVAAV
117928288	872839	Acidothermus cellulolyticus 11B	_ response regulator receiver/ANTAR domain-containing protein _	54	VIAEDEALIRLDLRETLEELGFDVVGEAADGAHAVELAAQLRPDVVVLDVKMPVLDGITAARQITSQRIAPVVILTAFSQRDLIERARDAGALAYLVKPFNAAELLPAI
117928273	872824	Acidothermus cellulolyticus 11B	_ response regulator receiver protein _	5	VLAVDDEPPALDELVYSLRQCPAVGTIYAAHDAAEALRCLEHDDVDVVFLDVVMPGLDGLELAGVLNRFARAPAVVFVTAHEKYAVAAFGVQAVDYVLKPFDVHRLSAAL
117928996	873547	Acidothermus cellulolyticus 11B	_ response regulator receiver modulated CheB methylesterase _	6	IRRMLAAVLDEDPELEVVGTAANGRIALDKLPQLRPDAVVLDVEMPVLDGLATLRELRRTHPRLPVIMFSTVTERGAQATLDALAAGASDYVTKPSKVSSV
117927431	871982	Acidothermus cellulolyticus 11B	_ response regulator receiver modulated CheB methylesterase _	6	VLLVEDSGVERRFLRTALSAEPGVAVVGEARNARDALALVDRLRPAAILLDLDLPGETAIELIERVMATSPTPILVYTANRDDDRAARALAAGAVEVVVRP
117928994	873545	Acidothermus cellulolyticus 11B	_ response regulator receiver protein _	7	MVIDDSSAMRLILGRIMRGLGFDVVEAPNGAEAIARLESGTLPDIALIDWNMPVMDGLAFVNAVRKREEWRNITLMMVTTESEQSQIVRALAAGAHEYVIKPFTPDAIADKL
117929080	873631	Acidothermus cellulolyticus 11B	_ CheA signal transduction histidine kinases _	96	ILVVEDSVGVRELERVILEGAGYEVTTAVDGLDGLARLRTELPDLVLADVEMPGMDGFTLTRTIRRTRGWEHLPVVIMTSRGDDGDRRAGMEAGANAYLLKSEFDQAQLVETV
120612634	YP	Acidovorax citrulli AAC00-1	_972312.1_ multi-sensor hybrid histidine kinase _	0	ILVVEDDVRNIFALSSVLEPTGAKVQIARNGREALEALERSQAGDAPQVDLVLMDIMMPEMDGFTAMREIRKRQEWRRLPIIALTAKAMKDDQEKCLAAGANDYIAKPLDVEKLLSLV
120610741	YP	Acidovorax citrulli AAC00-1	_970419.1_ multi-sensor hybrid histidine kinase _	0	VLLVEDNELNQLVAVELLRGAGFIVDVAAHGQAALDCVAHTEYDVVLMDMQMPVMDGETATRRLRADPRHARLPIIAMTANAMEADRRRCFDAGMNDHVPKPIEPGVLWRA
120612915	972593	Acidovorax citrulli AAC00-1	_ multi-sensor hybrid histidine kinase _	0	VLLVDDNELNRLVATGLLEAGGLQVDTADDGAQALEQLARAPDGTYDAVLMDMQMPVMDGLTATRRLRAQQRFATLPVIAMTANAAPQDVERARAAGMDDHLPKPV
120610824	970502	Acidovorax citrulli AAC00-1	_ response regulator receiver/ANTAR domain-containing protein _	101	ENGFNLVATLPADVFLSERIAQLQPDMVIVDAESAARDALEHVVMATREAPRPIVLFTNDEDTSHVRDAVAAGVTAYIVAGLAPQRIR
120608978	968656	Acidovorax citrulli AAC00-1	_ two component transcriptional regulator _	11	LMIEDDFRLAQMVIEYLGQSGLEVAHMADGQSGMARLQGSDAGPLPDLVILDLMLPDMDGLDVCRRIRSLPGAAAQVPVLMLTAKGDPMDRIIGLELGADDYLPKPFEPRELLARI
120610269	969947	Acidovorax citrulli AAC00-1	_ osmolarity response regulator _	11	ILVVDDDARIRDLLRRYLTQEGFEVMVAEDGKALNRILLRETVELIVLDLMMPGEDGLSICRRLRAANDRTPIIMLTAKGEDVDRIVGLEVGADDYLGKPFNPRELLARI
120611299	970977	Acidovorax citrulli AAC00-1	_ two component transcriptional regulator _	12	VLIVEDESAIAELIAVNLRHNGFQPIWSEDGESAQRELDAVLPDVILLDWMLPGQSGLQLARKWRADARTKPIPILMLTARGDEPDKVAGLDAGADDYITKPFSTQELLARI
120609560	969238	Acidovorax citrulli AAC00-1	_ Fis family two component sigma-54 specific transcriptional regulator _	130	ILVVDDEPDLRTLYELTLLREGYRVETAATVEEARQQLQTRRFDAVITDMRLPDGFGMELLQDIRQQKRRERCVVMTAYGSAENAVEALRSGAFDYLTKPVDLKQFRSV
120612775	972453	Acidovorax citrulli AAC00-1	_ two component transcriptional regulator _	13	LLLVEDDVMLASGIKLGLTDAGYAVDWVGSGERAEEVLRGETFDAAIIDIGLPGMDGLELTRRLREPEMASPSMPVLILTARDALHDRVQGLDLGADDYMVKPYELPELLARL
120613211	972889	Acidovorax citrulli AAC00-1	_ two component transcriptional regulator _	13	ILVVEDDDGIAAGLRANLQQRGYAVDVCGGIAPAWSALRSERFDAVLLDLGLPDGDGGELLTRLRAAPPAAPGGQPGRLPDPATPVLILTARDQVHQRIAGLDQGADDYLAKPFDVDELEARL
120611930	971608	Acidovorax citrulli AAC00-1	_ two component transcriptional regulator _	13	ILLVEDDPVLSRTMAQGLERAGHRVELAQNVEDARHWWAVQPFDAVLLDINLPHGPQARSGLGNGLAALRSARARGDRTPVLVLSARDSTEERIAGLDAGADDYLGKPYELKEVEARL
120608754	968432	Acidovorax citrulli AAC00-1	_ two component transcriptional regulator _	13	ILVVEDDAVLRGVMQRSLADAGHRVDVAATLAEADHFWKVQPFDAVLLDLNLPQDAAHASPVGSGLAVLRAARARGDRTPVLVLTARDRTEERIAGLDAGADDYLGKPFDLAEVEARL
120612603	972281	Acidovorax citrulli AAC00-1	_ two component transcriptional regulator _	13	LLLVEDDTMIGEAVYDLLRAEQHAVDWVRDGEMADTALRTQTYDVVLLDLGLPRRDGLQVLRDLRARKDRTPVLVATARDAVAQRVQGLDAGADDYVLKPYELDELLARI
120609596	969274	Acidovorax citrulli AAC00-1	_ response regulator receiver protein _	155	VLVVDDSKTELMFLTDLLQKKGMQVRTAENADEAFRRLAEEKPDLILMDVVMPGQNGFQLTRAISRDPQYADVPIIMCTSKNQETDRVWGMRQGARGYITKPVDPAELQAKI
120610581	970259	Acidovorax citrulli AAC00-1	_ Fis family two component sigma-54 specific transcriptional regulator _	156	LIVDDDADAADMLAALCSAEGYHAATAHTLEAARKKMVLQPPDVVLLDLHLPDGNGLSFMNEQSLRSNTQVVLVTGHATLETSIQALRLGAADYLVKPVSLPQLR
120611644	971322	Acidovorax citrulli AAC00-1	_ response regulator receiver protein _	167	ILIVDDNHEAAELLRDLLELNGHSVRVALDGAQAIALMRAQPALLLLVDQRLPDMLGAELVPQLKGIALAAGLPGCIAIGITGLNAAERASLGGFDHVLGKPL
120611204	970882	Acidovorax citrulli AAC00-1	_ PAS/PAC sensor hybrid histidine kinase _	16	VLVVEDDATVREFVCELLRDLGFQVLSASSGAGGMAMLSGAIHFDLLVSDVGLPGPNGRQVADFARERLPGILVLLMTGYAEQAAMDPGFLAAHHMELIVKPFDAQALVRKV
120611639	971317	Acidovorax citrulli AAC00-1	_ PAS/PAC sensor hybrid histidine kinase _	16	VLVVDDEPSVRALVVEVLHEMGYQTIEAHDGPSALQVLQSRTHLDLLITDVGLPGGMNGRQLADGGRLTRPDLQILFITGYAENAAVGNGHLERGMHVLTKPFTLDALAHRV
120613360	973038	Acidovorax citrulli AAC00-1	_ multi-sensor hybrid histidine kinase _	16	VLVVDDEPAVRSTVAESLREQGYRVLEAEDGPSALEMLREAGPLDLLLTDVGLPGGMNGRQVADAGRVLRPGLPVLFITGYAEQAVIGERDLDPGMGVLTKPFALDMLAARV
120612211	971889	Acidovorax citrulli AAC00-1	_ histidine kinase _	17	VLVVDDRVEVADLAQAMLEGLGYTVHVAHSAHAALKLVRSLEPSALPHLLFTDVVMPGGLNGYELAREMRKTVAGIHILLTTGFDRDMGSLANVAPTEFEILKKPYRLADLARRV
120612502	972180	Acidovorax citrulli AAC00-1	_ response regulator receiver protein _	189	IVEDNATIRENLIGTLEELAEVEAVGVAETEDEGKEWLATHPEQWDLAIVDLFLRQGSGLGILAACRDRATRQKMVVLSNYATPDVRVRCAQLGVDAVFDKSNEIDALVD
120612176	971854	Acidovorax citrulli AAC00-1	_ integral membrane sensor hybrid histidine kinase _	199	LMVVDNEEPDRELLVQLLAPLGFELRTAASGHDALDLLAAGYRPDVVFMDLAMPGIDGWETIRRLRAAGHARAHVAVVSANAFDKGLENDVGIRPEDFIVKPVRHTELLD
120610914	970592	Acidovorax citrulli AAC00-1	_ response regulator receiver protein _	19	VLLVEDDPSVARFVSMALEILPVAVETCPCVESALAWLRHHRAALVITDLMLPGESGMALLRQLQAEPALAAGARIVVLSAGLDHAVRQELAACGAWRALDKPVGVAALE
120609062	968740	Acidovorax citrulli AAC00-1	_ two component transcriptional regulator _	19	IVIEDEPQIRRFVRGALEEEGWQVHEAATLREGLSAAGTRQPDLLVLDLGLPDGDGVALIRDVRGWSAVPIIVLSARTDEADKIAALDAGADDYLTKPFGTGELLARV
120612957	972635	Acidovorax citrulli AAC00-1	_ two component transcriptional regulator _	1	VLVVEDEPGIATILSAYLQRDGLRARQAHDGLEALRLFRQLKPDMVLLDIHLPGMDGLDLLRAIREDGQTPVIMVTALADDVDKLVGLRLGADDYVVKPFSPPEVVARV
120610179	969857	Acidovorax citrulli AAC00-1	_ two component transcriptional regulator _	1	ILVVEDEPDIADVVLDYLRHSGFEAEHLAEGPAALARLTGPTPPDLTLLDIMLPGVDGLEVLRQARRHTDRPIIMLTARVEEVDRLIGLELGADDYICKPFSPREVVARVR
120611195	970873	Acidovorax citrulli AAC00-1	_ two component transcriptional regulator _	1	VLIAEDEPEIAEILAAYLARGGLQTVHAPDGQAALAMHQALKPDLVLLDVQMPRVDGWKVLSEIRHRGDTPVIMLTAMDQDIDKLMGLRIGADDYVVKPFNAAEVVARV
120612421	972099	Acidovorax citrulli AAC00-1	_ two component transcriptional regulator _	20	VLVVEDDEALARQLREALEAAGFAVDVEHDGEAASFAGSVEAYSAAVLDLGLPLKDGLSVLHDWREAGRGWPVLVLTARNRWSDKLAGFNAGADDYLTKPFLMDEVVLRL
120613015	972693	Acidovorax citrulli AAC00-1	_ response regulator receiver protein _	23	ILAVDDSPSMRKMVSFTLTGAGYHVVEAVDGQDALEKAETHDIQLVLADQNMPRLDGIGLTRKLREHPRFKTIPILILTTESSDQMKQAGRNAGATGWLVKPFDPNRLIEVI
120610798	970476	Acidovorax citrulli AAC00-1	_ response regulator receiver protein _	23	ILVVDDSSTVRSEVGHFLGSNGFQVALAVDGRDGLAKLKQHSGIKLIVCDVNMPHMDGLTMVERVRSELGNHRVNIVMLTTESSPAMKERGKAAGVKGWIVKPFNG
120612997	972675	Acidovorax citrulli AAC00-1	_ integral membrane sensor hybrid histidine kinase _	24	LLVEDDPQVARAVAELLQSWGLRVATAATATQAMAHAESGTAPDVVLCDQRLGGGESGFDVLRALLVRFPSARGALVSGEYDAAPLAQAEEDGYLVFRKPLAPEALHS
120608934	968612	Acidovorax citrulli AAC00-1	_ Fis family two component sigma-54 specific transcriptional regulator _	25	VYLIEDDAMVRRAYGQALELAHIPVRAFPHGQAALDAFGQDPPAVVVTDICMPGLDGMELLRLLRQRDADLPVVLVTGHGDVAMAVEAMRDGAYDFIEKPFSSERLLLTV
120610132	969810	Acidovorax citrulli AAC00-1	_ nitrogen metabolism transcriptional regulator NtrC _	29	IWIVDDDPSIRFVLEKALARENLPTRSFTHPREVLDALADVTAGDPARQGPQVLVSDIRMPGGSGLQLLEQVRQQQPGLPVIIMTAYSDLDSAVSAFQRGAFEYLPKPFDLPKAVEL
120609353	969031	Acidovorax citrulli AAC00-1	_ two component LuxR family transcriptional regulator _	2	VFVVDDHTLFRRGLIALLSQYPSLRVAGEAGDAGEALRLAPPLAPQVLLLDNHLPGVRGIDAIRGLREAMPDVRVLMLTVSEDGEDLAQALRHGAQGYLLKTIEGDLLADAI
120610891	970569	Acidovorax citrulli AAC00-1	_ two component Fis family transcriptional regulator _	32	LLIVEDDEALARTLARSFERRGYRVLHADSLAGVEDLLVLHAPGYAVVDLKLKGEASGLACVQKLHARNPAMRIVVLTGFASIATAVEAVKLGACHYLAKPSNTDDIETA
120610912	970590	Acidovorax citrulli AAC00-1	_ response regulator receiver protein _	35	VLIVDDHAEIRRLLRMTLEDQGVALHEAASGEAALAMARAQRPDLVLLDLMMPGSLDGMEVCRRIRNDPDLSHTRVIILSARDGLQDRAAGMQAGASGFISKPFSPAYLAETV
120609566	969244	Acidovorax citrulli AAC00-1	_ Fis family two component sigma-54 specific transcriptional regulator _	37	ILVVDDDADMLRLLSLRLNAAGYEITAVPSAEAALAQLETSRPQLVLSDVRLPGRDGLALFDEVRSRHPSLPVILLTAHGTIPDAVEATARGVFTYLTKPYDAKDLLDKI
120613269	972947	Acidovorax citrulli AAC00-1	_ two component transcriptional regulator _	39	ILIAEDDQVLADGLLRTLRGSGAAVDHVASGSDADTVLATTQEFDLLILDLGLPRMHGLDVLKRLRGRGSALPVLILTAADSVDERVKGLDYGADDYMAKPFSLQELEARV
120613018	972696	Acidovorax citrulli AAC00-1	_ two component LuxR family transcriptional regulator _	3	VVLCDDHAVLRRGIRDTLTEAPDIQVTGEAGGYSELREILRKAPCDVLLLDLNMPGRSGLEVLSSLKETDSAIKVLVVSMYPEDQYALRCLRAGAQGYANKAGDPMELIEAVR
120609812	969490	Acidovorax citrulli AAC00-1	_ two component LuxR family transcriptional regulator _	3	VLLVDDHPLVRDGVRMRLDATPHIRVAAEAGGVQEALALAEAVAPDIVLTDIRMPDGSGIQLAALFRERFPLVRVMVLSMHQDAEYVRRAVGLGVRGYVLKDAPAGQLVQAIE
120612865	972543	Acidovorax citrulli AAC00-1	_ two component LuxR family transcriptional regulator _	3	FLVDDHALVRDGLRARLGSLPWVAIVGEASGAEEAGPLIARLAPGIVLMDVGMKDVSGLDFAARLLAGDGAPRVLMLSMYDNPEYVQRALQVGASGYVLKDAPASELVAAL
120612503	972181	Acidovorax citrulli AAC00-1	_ two component LuxR family transcriptional regulator _	3	IVDDHAIVRSGLRQFLSEHVDLRVVGEAANGREAIDLVRNHEIDVLLMDLSMPGQSGLDALAMLRAKAPDMGILILSGYPEEHYAINLIRQGASGYLNKECDPKEIVEAIR
120611809	971487	Acidovorax citrulli AAC00-1	_ PAS/PAC sensor hybrid histidine kinase _	44	VMYVDDDQALVFLVQRLLRRRGYRVTGFTDPREAVVALGADPQAYDLVVTDYNMPGYCGVDLVREAKRIRADLPVALASGHVTAEIEREALAEGASALIHKPNDVDELCATV
120609595	969273	Acidovorax citrulli AAC00-1	_ response regulator receiver protein _	45	VLVVDDSNTIRRSAEIFLKQGGHEVLLADDGFDALAKVNDYQPQLIFCDILMPKLDGYQTCAIIKRNARFADTPVVMLSSKDGVFDKARGRMVGCQEYLTKPFTKDQLLKAVQ
120609599	969277	Acidovorax citrulli AAC00-1	_ CheA signal transduction histidine kinase _	47	VLVVDDSITVRRVTQRLLKREGYRVALAADGLQALERLQEERPAVVLSDIEMPRMDGFDLARNIRADRELHALPIIMITSRIAQKHREHAAELGVNHYLGKPYSDEELLSLV
120613017	972695	Acidovorax citrulli AAC00-1	_ response regulator receiver sensor signal transduction histidine kinase _	48	ANGMYEIRHADTMESFVAWLDAERFDLVLADYRLPGFTALDAWRWVSERGEPPPFVLLSGAIGEAAAVDAMRLGMADYLLKDDMARLP
120611638	YP	Acidovorax citrulli AAC00-1	_971316.1_ PAS/PAC sensor hybrid histidine kinase _	49	ILTVEDHPDASEMLAVVLSDGGARPRQAVDFDSAMQALRERWPDVVVSDIGLPGRDGYELARALRDMPVPQGLKPPIAIALTAFSRPQDANKALEAGFDAHLGKPLQPHALMATI
120608880	968558	Acidovorax citrulli AAC00-1	_ Fis family two component sigma-54 specific transcriptional regulator _	4	ILAVDDDAAFRESLVETLQGLGHEVHEAASGDEALRQAGRHRYAAIFLDHRMPGMDGLETLAALAARVPELPPVVVLTAYASGSGTIEAMRLGAFDHLTKPVGRAAVIEVL
120612631	972309	Acidovorax citrulli AAC00-1	_ response regulator receiver sensor signal transduction histidine kinase _	51	LLVDDVPENLIALEALLRSDDVHILKAASGPEALELLLAHADVALAMLDVQMPEMNGFELAELIRGSERTRHIPLIFMTAGSRDQNWQFKGYENGAVDFLYKPIDPHMLVNKA
120610741	970419	Acidovorax citrulli AAC00-1	_ multi-sensor hybrid histidine kinase _	52	VLIVDDNHTAAAVLSEMLRSMGFETRESHAGAQALDMLRDAAADGEPYGLLLIDWRMPGMDGIELARRIHELGLDQAPQMLMVTAYGRDEIMPAAREQGIETVLVKPVSASLLYDTL
120612634	972312	Acidovorax citrulli AAC00-1	_ multi-sensor hybrid histidine kinase _	55	ILVVEDDTRFARILYDLAHEMGFQCIVTHSGGEGLAAATDYMPSAVVLDMNLPDFSGLGVLDQLKRNPATRHIPVHVVSVADYSQEALGLGAMGYALKPVKRDELVQAL
120610714	970392	Acidovorax citrulli AAC00-1	_ response regulator receiver protein _	5	LIAEDEPLLAQALRQELARAWPGLQIAATVGDGRSAVRQALELRPDVLWFDIRMPGLGGLEAALELADAWPLDAAPFPALVFVTAYDQYAVDAFEAQALDYLLKPVQAPRLLKTV
120610627	970305	Acidovorax citrulli AAC00-1	_ LytR/AlgR family transcriptional regulator _	5	ILIVDDEALARSRLRTLLSDSGGHTLAEAANAAEALQLLRAPGGRPFDAVLLDIHMPGQDGLSLAHVLRALASPPAIVFVTAHADHAVSAFELDAADYLTKPVRAERLQQAL
120610580	970258	Acidovorax citrulli AAC00-1	_ multi-sensor hybrid histidine kinase _	62	IVVVEDNADMLRSVNAYLLGRGHTVRTAEDGLDGLVLIIAERPDVAIVDIGLPGVDGYEVALRARAAGYAGRMVAVSGYGQAQDISKARKAGFDEYLVKPITMEQLQNAM
120611088	970766	Acidovorax citrulli AAC00-1	_ signal transduction histidine kinase with CheB and CheR activity _	62	VLLADDNEDVTWSISHLLEGCAVVTAADGHEALRKARELTPDVAVLDLGMPGIDGIAVARALRAEPFGDRMLLVAATGWGQDHNREQARDAGFDAYMVKPLDVRELQR
120612634	YP	Acidovorax citrulli AAC00-1	_972312.1_ multi-sensor hybrid histidine kinase _	67	VLVVEDDDRQRESMRHLLANGDVEIVGAETAQRALQLLRESTFDCMVMDLNLPDLSGYELLEQMAGQEEVAFPPVIVYTGRSLSRDEEQRLRRFSKSIIIKDARSPERLLDEV
120612195	971873	Acidovorax citrulli AAC00-1	_ chemotaxis-specific methylesterase _	6	VIVVDDSAVVRQVLTGLLGEAPGIEVLYAAADPLLAMERMKHQWPDVILLDVEMPRMDGITFLRKIMAERPTPVVICSTLTEKGARTTMEALAAGAVAIVTKP
120613010	972688	Acidovorax citrulli AAC00-1	_ response regulator receiver modulated CheB methylesterase _	6	VIVVDDSALVRSLLSEIINRQHDMECIGTANDPLIAREMIREMNPDVITLDVEMPRMDGIDFLGRLMRLRPMPVVMISTLTERGAEVTMKALELGAVDFVAKP
120612912	972590	Acidovorax citrulli AAC00-1	_ two component transcriptional regulator _	70	IAVLDDDLILIELIQATAARAGHSCYLYQEGKEFLKALRTETFDLMVVDWHLPDMEGLEVIRTVRAASMSVPILFITRRNAEQDLVEALASGADDFMTKPLRMGEFIA
120613158	972836	Acidovorax citrulli AAC00-1	_ two component Fis family transcriptional regulator _	74	ILVVDDELGIRDLLSEILNDEGHSVDLAENATQARAARSANTYDLVLLDIWMPDTDGVSLLKEWATAGVLTMPVIMMSGHATIDTAVEATRIGAFSFLEKPITLQKLLKAVE
120613046	972724	Acidovorax citrulli AAC00-1	_ response regulator receiver protein _	7	LIVDDFSTMRRIVRNLLKESGFTDADEAEDGVVALNKLRNSKFDFVVTDINMPNMNGFQLLAEIKKDDKLKHLPVLMVTAEARKEDIVAAAQGGAAGYIVKPFTKATLEEKV
120612280	971958	Acidovorax citrulli AAC00-1	_ response regulator receiver _	7	LVIDGNATSRSILVAQLREYGIARVVQCSRVQDARARLEHTVFDYVLCEQYFQETGQSGQTLLDDLRRAQMLPFSTVFFMVTAEASYAAVAEAAESALDGYLLKPFTPSALFERL
120612175	971853	Acidovorax citrulli AAC00-1	_ two component LuxR family transcriptional regulator _	8	VLIVDDVPDNLAVLHDALDESGYTVLVATGGETALARAAQAMPDVVLLDAMMPGMDGFEVARRLKARPATAHIPIIFMTGLTETEHLEAALAAGGVDYVTKPIKPREVLARM
120610742	970420	Acidovorax citrulli AAC00-1	_ response regulator receiver modulated metal dependent phosphohydrolase _	8	VLVVDDTPDNLALMATLLRDHYLVKVASHGEKALRIAQSDPPPDLILLDIMMPGLDGYEVCRQLKAHPASRDIPIIFLTARSTPEDERRGLAAGAVDYITKPISPPILLARV
120611131	970809	Acidovorax citrulli AAC00-1	_ two component LuxR family transcriptional regulator _	9	VYVVDDDEAVRDSLQWLLEGKDYRVRCFDSAESFLSRYDPREVACLIVDIRMGGMTGLELQDRLLERKSPLPIVFITGHGDVPMAVNTMKKGALDFIQKPFNEDELVSLV
120613284	972962	Acidovorax citrulli AAC00-1	_ two component LuxR family transcriptional regulator _	9	VYIVDDDAGVREALAWLLRSRRVPSESFDSAEAFEAILGDRPLLRQPCCLLLDVRMPGMSGLALFDRLAERGLIGAMPVIFLTGHADVPTAVATVKRGAFDFCEKPFSDNLLVDRI
222109842	YP	Acidovorax ebreus TPSY	_002552106.1_ histidine kinase _	0	ILVVEDDVRNVFALSSVLEPTGARVEIARNGREALEALERSNAAGESAVDLVLMDIMMPEMDGFAAMAEIRRRPEWRRLPIIALTAKAMKDDQEKCLAAGANDYIAKPLDVEKLLSLV
222110175	YP	Acidovorax ebreus TPSY	_002552439.1_ multi-sensor hybrid histidine kinase _	0	VLLVEDNELNQIVAQELLRDAGMHVDVASNGQEAIACIDRRRYDVVLMDMQMPVMDGETATRQLRADPRHAGLPIIAMTANAMQADRERCFAAGMNDHVPKPIDPDVLWATL
222111390	2.55365e+06	Acidovorax ebreus TPSY	_ winged helix family two component heavy metal response transcriptional regulator _	10	LLIVEDEIKLAEYLRKGLSEEGYVVEVAHNGVDGLHLAMEGAYDLIVLDGMLPGIDGMGVLAALRQSRQTPVLMLTARMRVEDRVRGLKAGADDYLVKPFAFTELVARI
222111377	2.55364e+06	Acidovorax ebreus TPSY	_ winged helix family two component heavy metal response transcriptional regulator _	10	ILIVEDEPKTGAYLRQGLSEAGYSCDLVPNGGDGLHMAIHGQYDLVILDVMLPGLNGWQVLQSLRDRGLEMPVLFLTARDQVEDRVKGLELGADDYLVKPFSFAELLARVR
222109434	2.5517e+06	Acidovorax ebreus TPSY	_ winged helix family two component transcriptional regulator _	11	LMIEDDHRLAQMVGEYLGQSGLQVTHMADGASGLARLQAPEGGQLPALVILDLMLPDIDGLEVCRRIRALPGAAAQVPVLMLTAKGDPMDRVIGLEIGADDYLPKPFEPRELLARI
222111672	2.55394e+06	Acidovorax ebreus TPSY	_ osmolarity response regulator _	11	VLVVDDDARIRDLLRRYLTQEGFEVMVAEDGKALNRILLRETVDLIVLDLMMPGEDGLSICRRLRAANDRTPIIMLTAKGEDVDRIVGLEVGADDYLGKPFNPRELLARI
222110688	2.55295e+06	Acidovorax ebreus TPSY	_ winged helix family two component heavy metal response transcriptional regulator PhoB _	12	VLIVEDESPIAELVAVNLRHNGFQPIWAEDGESAQRELDAVLPDVILLDWMLPGQSGLQLARKWRADSRTKQIPILMLTARGDEPDKVAGLDAGADDYITKPFSTQELLARI
222112110	2.55437e+06	Acidovorax ebreus TPSY	_ two component sigma-54 specific Fis family transcriptional regulator _	130	ILVVDDEPDLRTLYELTLLREGYRVETAASVDDARQQLQTQKFDVVITDMRLPDGFGMDLLHDLRSQQRRERCVVMTAYGSAENAVEALRAGAFDYLTKPVDLKQFRAVV
222110947	2.55321e+06	Acidovorax ebreus TPSY	_ winged helix family two component transcriptional regulator _	13	VLLVEDDEALSEAVCGYLRAKAFVVDAVPSLAQAGAALRAAQYAAVLLDLHLADGDGLSLLPQIRALKDRPIVIVLTARDQVSDRIAGLDAGADDYLVKPYDPGELLARL
222110663	2.55293e+06	Acidovorax ebreus TPSY	_ winged helix family two component transcriptional regulator _	13	ILLVEDDLPLASALAEFLCAKGFVCECAASLQAARALLPLAHWGAVLLDWQLPDGEGLALLPLLRARLPEAAVIVLTARDQITDRIQGLDAGADDYLVKPYDPDELLARL
222112070	2.55433e+06	Acidovorax ebreus TPSY	_ response regulator receiver protein _	155	VLVVDDSKTELMFLTDLLQKKGMQVRTAENAEEAFRRLAEEKPDLILMDVVMPGQNGFQLTRAITRDPQYADVPIIMCTSKNQETDRVWGMRQGARGYITKPVDPAELQAKI
222112001	2.55427e+06	Acidovorax ebreus TPSY	_ response regulator receiver protein _	189	IVEDNATIRENLIGTLEELAEVEAVGIAETEDEGKEWLTSHTSQWDLAIVDLFLRQGSGLGVLAACRNRLSAQKMVVLSNYATPDVRMRCAQLGVDAVFDKSNEIEALVD
222110191	2.55246e+06	Acidovorax ebreus TPSY	_ winged helix family two component transcriptional regulator _	1	ILVVEDEQDIADVLLDYLRHAGYAPEHAADGRTALQALTAPQPPDLTLLDVMLPGIDGLEVLRQARRHTDNPIVVITARVEEVDRLIGLELGADDYICKPFSPREVVARVK
222111775	2.55404e+06	Acidovorax ebreus TPSY	_ response regulator receiver modulated diguanylate cyclase _	1	VLLVEDQASVRATLAGELRHVGVSEVLEAASADAALQLFKLRRPDLVLLDIRLPGGNDGYWVAQRMREAEPGGWTPIIFLSGLDGDLDVWRGIEAGGDDYLVKPVKPIVLAAKL
222112594	2.55486e+06	Acidovorax ebreus TPSY	_ winged helix family two component transcriptional regulator _	20	ILVVEDEPTLCAQLVQAIAAAGHTVEHASDGAQAHYLGEVEDFDAVVLDLGLPVLDGLSVLRRWRAAGRNMPVLILTARSAWHEKVAGMDAGADDYLAKPFHMEELLARL
222109254	2.55152e+06	Acidovorax ebreus TPSY	_ two component LuxR family transcriptional regulator _	21	LLVADDHPLFRAALIQVLHERFAPLQTLEAASAATLGQALQDHPEVELVLLDLAMPGARGFSALLHVRGEYPQVPVVVISSNDHPRVIRRAQQFGAAGFIPKSAPAEDMGAAI
222112234	2.5545e+06	Acidovorax ebreus TPSY	_ response regulator receiver protein _	23	ILAVDDSPSMRKMVSFTLTGAGYHVVEAVDGQDALEKAETHDIHLVLADQNMPRLDGIGLTRKLREHPRFKSIPILILTTESSDQMKQAGRSAGATGWLVKPFDPTRLIEVI
222109253	2.55152e+06	Acidovorax ebreus TPSY	_ pas/pac sensor hybrid histidine kinase _	24	IDDDAPSCEATGALLRRWGCEVPLAGGPQSALDLAAPGNAPQLVLLDVRMGPFHGPDLYDRLCTVWGQAPSVVLVTAERSSTLRRQAAERGWGYLLKPVRPSALRALI
222110325	2.55259e+06	Acidovorax ebreus TPSY	_ nitrogen metabolism transcriptional regulator, ntrc, fis family _	29	IWIVDDDPSIRFVLEKALARENLPTRSFTQARDVLDALADVAAGDPTHQGPQVLVSDIRMPGGSGLQLLEKVRGLQPGLPVIVMTAYSDLDSAVSAFQGGAFEYLPKPFDLPKAVEL
222109644	2.55191e+06	Acidovorax ebreus TPSY	_ two component LuxR family transcriptional regulator _	2	FLIDDHTLLRRGLVALLSQQPDLRVVGEAGDAAEALRLLPALRPDVILLDNHLPGVRGVDAIAGLREASQGSRVLMLTVSEDGQDLAAALRNGAQGYLLKTIDGDLLAQAI
222111445	2.55371e+06	Acidovorax ebreus TPSY	_ two component Fis family transcriptional regulator _	32	LLIVEDDEAFARTLARSFERRGYRVLHADSLAQAEALLAGHTPDYAVVDLKLKGEATGLACVRALHAANPDMLIVVLTGYASIATAVEAVKLGACHYLAKPSNTDDIEAA
222112512	2.55478e+06	Acidovorax ebreus TPSY	_ winged helix family two component transcriptional regulator _	39	ILIAEDDQVLADGLLRTLRGSGAVVDHVASGTEVDTALLTNNEFDLLILDLGLPKMHGLEVLKRLRGRGSALPVLILTAADSVDERVKGLDLGADDYMAKPFALSELEARV
222112237	2.5545e+06	Acidovorax ebreus TPSY	_ two component LuxR family transcriptional regulator _	3	VVLCDDHAVLRRGIRDTLTESPDIHVTGEAGSYPELREVLRTAACDVLLLDLNLPGRSGLEVMASVKETHPDIKVLIVSMYPEDQYALRCLKAGAHGYANKAGDPVQLIAAVQ
222112002	2.55427e+06	Acidovorax ebreus TPSY	_ two component LuxR family transcriptional regulator _	3	IVDDHAIVRAGLRQFLSEHVDLRVVGEASNGREAIDLVRVHEIDVLVMDLSMPGQSGLDALAMLRAKAPDMGILILSGYPEEHYAINLIRQGASGYLNKECEPKEIVEAIR
222110930	2.55319e+06	Acidovorax ebreus TPSY	_ signal transduction histidine kinase, nitrogen specific, ntrb _	44	VMYVDDDQALVFLVQRLLRRRGYEVSGFTDPHQATDALQAHPERYDLLVTDYNMPGYSGLDLVRAARTIRSDLPVALASGYVTAEIEQAALAEGARALIHKPNDVEELCATV
222112071	2.55434e+06	Acidovorax ebreus TPSY	_ response regulator receiver protein _	45	VLVVDDSNTIRRSAEIFLKQGGHEVLLADDGFDALAKVNDYQPQLIFCDILMPKLDGYQTCAIIKRNARFADTPVVMLSSKDGVFDKARGRMVGCQEYLTKPFTKDQLLQAVQ
222112067	2.55433e+06	Acidovorax ebreus TPSY	_ chea signal transduction histidine kinase _	47	ILVVDDSITVRRVTQRLLQREGYRVALAADGLQALERLQEERPAVVLSDIEMPRMDGFDLARNIRSDAALQDLPIIMITSRIAQKHRDHAMELGVNHYLGKPYSDEELMSLV
222112236	2.5545e+06	Acidovorax ebreus TPSY	_ response regulator receiver sensor signal transduction histidine kinase _	48	LEDSTADHALVRLTLRRAGLSHEIHQVDSLEAFTGWLERESFDVILADYRLPGFTALDAWRIVEQCPGHPPFVLLSGAIGEAAAVDAMRLGFADYLLKDDMARLP
222109845	2.55211e+06	Acidovorax ebreus TPSY	_ response regulator receiver sensor signal transduction histidine kinase _	51	LIVDDVPENLVALQALLKDEDVEILMAGSGAQALELLLAHNDVALALLDVQMPEMNGFELAELIRGSERTRHIPLIFITAGSRDQGWQFRGYEKGAVDFLYKPVDPHMLVNKA
222110175	2.55244e+06	Acidovorax ebreus TPSY	_ multi-sensor hybrid histidine kinase _	52	VLVVDDNHTAAQVLVDMLQTMGLQATQVHSGVQALQALRDAVAEQRPYGLLLLDWHMPGMDGIELARRIRGLGLAHIPQMLMVTAHGRDEVMDAARSAGIDNVLVKPVSASVLFDT
222109842	2.55211e+06	Acidovorax ebreus TPSY	_ histidine kinase _	55	ILVIEDDPRFARILCDLAHEMGFQCVIASTGSDGLAAALEYGPSAVVLDMNLPDFSGLGVLDQLKRNPATRHIPVHVVSVADYMQEAMERGAIGYALKPVKREELEQAL
222111837	2.5541e+06	Acidovorax ebreus TPSY	_ LytR family transcriptional regulator _	5	ILIVDDELLARSRLRTLLADCDPRHSVTEAAHAADALAQLEASGGRAVDVVLLDIHMPGQDGLGLAHHIQRLPHPPAIVFVTAHADHALSAFELDAVDYLTKPVRLQRLQQAL
222110282	2.55255e+06	Acidovorax ebreus TPSY	_ LytR family transcriptional regulator _	5	LIAEDEPLLAAALRHELQQAWPALEVAASVGDGLSAVREALALRPDVLLLDIRMPGQSGLEAAAELADAWPDSAAFPALVFVTAYDQYAVQAFEAQAVGYLLKPVQPARLRQTVQ
222109842	YP	Acidovorax ebreus TPSY	_002552106.1_ histidine kinase _	67	VLVVEDDARQRESVHHLLATDGVEIVGAATARQALDLLKGSTFDCVVMDLHLPDLNGYELLQQMAEQEEVSFPPVIVYTGRNLSRDEEQQLRRFSKSIIIKDARSPERLLDEV
222112229	2.55449e+06	Acidovorax ebreus TPSY	_ response regulator receiver modulated cheb methylesterase _	6	VIVVDDSALVRSLLSEIINRQSDMECIGTANDPLIAREMIREKNPDVITLDVEMPRMDGIDFLGRLMRLRPMPVVMISTLTERGAEVTMRALELGAVDFVAKP
222112405	2.55467e+06	Acidovorax ebreus TPSY	_ two component Fis family transcriptional regulator _	74	ILVVDDELGIRDLLSEILNDEGHSVDLAENATQARNARLNGSYDLVLLDIWMPDTDGVSLLKEWAMAGTLTMPVIMMSGHATIDTAVEATRIGAFSFLEKPITMQKLLKAVE
222111492	2.55376e+06	Acidovorax ebreus TPSY	_ response regulator receiver and antar domain-containing protein _	75	NGFNLVATLPGDMFLGERLAQLQPDLVIVDAESEARDALEHVVMATREAPRPIVMFTNDEDTRHVKDALAAGVTAYIVAGLAPQRIR
222112259	2.55452e+06	Acidovorax ebreus TPSY	_ response regulator receiver protein _	7	LIVDDFSTMRRIVRNLLKESGFADADEAEDGVAALNKLRNGKFDFVVTDINMPNMNGFQLLGEIKKDDKLKHLPVLMVTAEARKEDIVAAAQGGAAGYIVKPFTKATLEEKVN
222110176	2.55244e+06	Acidovorax ebreus TPSY	_ response regulator receiver modulated metal dependent phosphohydrolase _	8	VLVVDDTPDNLTLMAGLLQGHYRVKVAASGEKALVIAQSDAPPDLLLLDIMMPGIDGYEVCRRLKANEATRHIPVIFLTARSDPDDEREGLALGAVDYITKPISPSILLARV
222112672	2.55494e+06	Acidovorax ebreus TPSY	_ two component LuxR family transcriptional regulator _	9	VYIVDDDRSVRAALEDLLASVGLKVSTFGSTKEFLACPLEDAPGCLVLDVRMPGQSGMDFHRQMIEMGIGLPVVFITGHGDIAMGVEAMKNGAIEFLTKPFRDQNLLDAIQ
222110849	2.55311e+06	Acidovorax ebreus TPSY	_ two component LuxR family transcriptional regulator _	9	VYVVDDDEAVRDSLQWLLEGKDYRVRCFDSAESFLARYDPREVACLIVDIRMGGMTGLELQDRLVERKSPLPIVFITGHGDVPMAVNTMKKGALDFIQKPFNEEELLG
222112528	2.55479e+06	Acidovorax ebreus TPSY	_ two component LuxR family transcriptional regulator _	9	VYIVDDDAEVREALAWLLRSRRVLSEAFASAEAFETMLAERSASGLMQRQPCCLLLDVRMPGGMSGLALFDKMVERGDTAGMPVIFLTGHADVPTAVATVKRGAFDFCEKPFSDNQLVDRIQ
213156036	2.31808e+06	Acinetobacter baumannii AB0057	_ multi-sensor hybrid histidine kinase _	0	ILAVDDHLPNLIVLEALLGELNVKTTKALSGQEALNIIQERIDQKLKPFDLVFMDIQMPVMSGIDTTRAIRSLESTLDGEMQLPIIALTAHALADEKQKLLKVGMNDYVTKPIQMEQIIQIL
213158597	2.3199e+06	Acinetobacter baumannii AB0057	_ two-component heavy metal response regulator protein _	10	ILIIEDEIKIATYLVKGLKESGYQAECVHLGLQGLEMLKRDQYDLLILDVMLPDIEGWSVLQVLRQFSKIPVIFLTAKDQVMDRVKGLELGADDYLAKPFSYIELLARIK
213156019	2.31806e+06	Acinetobacter baumannii AB0057	_ transcriptional activator protein CusR _	10	ILLVEDEQKTGDYLKQGLSEAGYITDWVTDGLSGKHQALSEEYDLIILDVMLPKLDGWNIINDIRKSGKTMPILFLSARDQIEDRVKGLELGADDYLVKPFAFAELLARIK
213158975	2.32097e+06	Acinetobacter baumannii AB0057	_ two-component system response regulator protein _	11	ILVVDDDVRLRTLLQRFLEDKGFVVKTAHDASQMDRLLQRELFSLIVLDFMLPVEDGLSICRRLRQSNIDTPIIMLTARGSDSDRIAGLEAGADDYLPKPFNPNELLARI
213159117	2.32112e+06	Acinetobacter baumannii AB0057	_ phosphate regulon transcriptional regulatory protein PhoB _	12	ILIVDDELPIREMIHTSLDMAGFQCLQAEDAKQAHQIIVDQRPALILLDWMLPGGVSGVDLCRRLKRDENLAEIPVIMLTARGEEDHKVQGLDAGADDYMTKPFSTRELVSRIK
213157830	2.32063e+06	Acinetobacter baumannii AB0057	_ type IV pilus response regulator protein PilH _	133	ILIVDDSPTETFRFKEILTKHGYDVLEASNGADGVTLAKAEQPDLVLMDVVMPGVNGFQATRQITRDEDTKHIPVVIVSTKDQATDRVWGKRQGAIDYLIKPIEEKQLIDVI
213158688	2.31999e+06	Acinetobacter baumannii AB0057	_ two-component system response regulator protein _	13	ILLAEDDRSQAESIQSWLELDGYQVDWVERGDYALTAIEQHDYDCILLDRGLPQLAGEKVLTTIRHKQKNVPVIFITARDSIHDRVEGLDLGANDYLVKPFSLEELSARI
213157694	2.32049e+06	Acinetobacter baumannii AB0057	_ two-component system DNA-binding response regulator _	13	ILMIEDDFMIAESTITLLQYHQFEVEWVNNGLDGLAQLAKTKFDLILLDLGLPMMDGMQVLKQIRQRAATPVLIISARDQLQNRVDGLNLGADDYLIKPYEFDELLARI
213158519	2.31982e+06	Acinetobacter baumannii AB0057	_ two-component system regulatory protein KdpE _	19	IVIIDDEPQIRKFLDIALRTQKYKTTLCETGYKGLETLATQGADLVILDLGLPDLDGREVLQELRSWSNVPVIVLSVRADEYEKVALLDAGANDYMTKPFSVQELLARI
213157895	2.32069e+06	Acinetobacter baumannii AB0057	_ two component signal transduction system response regulator _	1	IMLVEDEVELAHLVRDYLEAAGFEVSMFHDGQDAYTNFQQRKPNLMILDLMVPRMDGLTICRKVREQSDLPIIMVTARTEEIDRVLGLNMGADDYVCKPFSPKELVARVQ
213156532	2.31819e+06	Acinetobacter baumannii AB0057	_ two-component system response regulator protein _	1	ILIVEDDERLARLTQEYLIRNGLEVGVETDGNRAIRRIISEQPDLVVLDVMLPGADGLTVCREVRPHYHQPILMLTARTEDMDQVLGLEMGADDYVAKPVQPRVLLARI
213157394	2.31944e+06	Acinetobacter baumannii AB0057	_ AdeR _	1	ILVVEDDYDIGDIIENYLKREGMSVIRAMNGKQAIELHASQPIDLILLDIKLPELNGWEVLNKIRQKAQTPVIMLTALDQDIDKVMALRIGADDFVVKPFNPNEVVARVQ
213159043	2.32104e+06	Acinetobacter baumannii AB0057	_ two-component system response regulator protein _	21	ILIVDDHPLFRHALIQAVRYSLPQAQIHETASVDEFYERLENGAEPDLVLLDLNLPGASGFSALVYVRAQYPSIPIIVVSAHEEASIIQRAIAHGAMGYIPKSAHPSHIGEAI
213159041	2.32104e+06	Acinetobacter baumannii AB0057	_ two-component system hybrid histidine kinase/response regulator _	24	ILCLDNDETILEGMSSLLGRWGYQVFKATEPEQALEIIQKENIQVWLIDQHLNHNQLGVDFITQNRQEDVPVALITADSHPELPQQLKELNIVLLKKPLKPASLRA
213158377	2.31968e+06	Acinetobacter baumannii AB0057	_ nitrogen metabolism transcriptional regulator, NtrC, Fis Family _	29	WVLEKTFKEEGFDVTNFEEAQTALERLHHDAPDVILTDIRMPGIDGLTFLSKVKNSHPDLPVIIMTAHSDLESAVSSYQTGAFEYLPKPFDIDEALALV
213157831	2.32063e+06	Acinetobacter baumannii AB0057	_ type IV pilus response regulator receiver protein PilG _	45	VMVIDDSKTIRRTAETLLQREGCEVITAVDGFEALSKIAEANPDIVFVDIMMPRLDGYQTCALIKNSQNYQNIPVIMLSSKDGLFDQAKGRVVGSDEYLTKPFSKDELLNAIR
213157827	2.32063e+06	Acinetobacter baumannii AB0057	_ type IV pilus hybrid sensor kinase/response regulator PilL _	47	IMIVDDSVTVRKVTSRLLERQGYDVVTAKDGVDAIEQLENIKPDLMLLDIEMPRMDGFEVLNLVRHHDMHQYMPIIMITSRTGEKHRERAFLLGVSQYMGKPFQEEELLENI
213155689	2.31773e+06	Acinetobacter baumannii AB0057	_ response regulator _	59	VLVVDDHELVRTGICRMLEDHADVEVIGQAESGEEAIAIVRQQHPQVVLLDVNMPGIGGVETTRRLLQTAPETKVIAVSGLAEEPYPSLLLKAGAKGYITKGAPIAEMVRAIN
213155713	2.31776e+06	Acinetobacter baumannii AB0057	_ alginate biosynthesis regulatory protein _	5	VLICDDEPLAVERLSRLVSKMGHEVVATAHHGQDALEQARLHHPDVILLDIQMPGMNGLVCAEQLSQLNPRPAIVFCTAYDQHALEAFKSQAQAYLLKPIDPQELEQT
213158406	2.3197e+06	Acinetobacter baumannii AB0057	_ response regulator protein _	75	IALIDDDHARADYIKNSLLENDFEVVACLTLDHLNIFRLEDLQADVILLDMDHPHRDIIESCVSSYDLPTVLFTKNSDKDTIKQAIDAGVTAYIVDGIDPARLHTIL
213156954	2.319e+06	Acinetobacter baumannii AB0057	_ two component transcriptional regulator, LuxR family _	8	ILIVDDVPENLGLLHESLDQAGYRVLVTTDGLSAIEIAHRCLPDMILLDGNMPHMDGFESCIQLKASPITQFIPVIFMTGLSETEHIVRGFQVGGVDYVTKPLNIEEVLARVK
213155687	2.31773e+06	Acinetobacter baumannii AB0057	_ type 4 fimbriae expression regulatory protein PilR _	95	VLLVDDEEDLCLLMQMTLARMGIKTHLAYRVEQAKQLFTQFHYDACLTDLNLPDGSGIDLVKHVSQNYTNTPIAVLTAYGNMDIAIAALKAGAFDFVSKPVNQVHLDQ
126208723	1.05395e+06	Actinobacillus pleuropneumoniae serovar 5b str. L20	_ phosphate regulon transcriptional regulatory protein PhoB _	12	LLQQNYQVLEAEDYQSAVKKLSEKPKLILLDWMLPGRSGIQFIQYLKKSEETAQIPILMLTARSSEDDCIVCLNTGADDYVTKPFSPKVLIARI
126208535	1.05376e+06	Actinobacillus pleuropneumoniae serovar 5b str. L20	_ transcriptional regulatory protein QseB _	13	ILLIEDDKLIGDGLKLGLTKQNFVVDWFQDGKLGFEALFSTEYDAVVLDLTLPKMDGLAILKNWRKENLDIPVLILTARDTLDERILGFNSGADDYLCKPFALMEVVVRL
126208111	1.05334e+06	Actinobacillus pleuropneumoniae serovar 5b str. L20	_ transcriptional regulatory protein CpxR _	1	ILLVDDDIELTELLAELLSLEGFEIHCVHNGQDALTELELQSYDLILLDVMMPVLNGIETLKQLRQKHSTPVLMLSARDDEIDRVLGLELGADDYLPKPFNDRELVARIK
126207536	1.05276e+06	Actinobacillus pleuropneumoniae serovar 5b str. L20	_ two-component response regulator _	38	ILIVEDELVTRNTLKSIFEAEGYEVFEATDGTEMNAILAQQEINLVIMDINLPGKNGLMLARELRENTKIALMFLTGRDNEVDKILGLEIGADDYITKPFNPRELTI
126207547	1.05277e+06	Actinobacillus pleuropneumoniae serovar 5b str. L20	_ nitrate/nitrite response regulator protein _	3	ILLIDDHPLMRQGIRQILELEDNFVIVGEASNGTDGISIALDTNPDLIILDLNMKGISGLDTLRALRKHGIDSRIVVLTVSDEQSDVFALMDAGVDGYLLKDSDTAELVENI
126208411	1.05364e+06	Actinobacillus pleuropneumoniae serovar 5b str. L20	_ aerobic respiration control sensor protein _	86	VLLVEDIEVNVVVARAMLEKFGCDVDVAMTGAQAFELFERNSYDLILLDIQLPDMTGFDIAQRLRERYENEEVDYLPLLVALTANIMQTKEEYQQQGMDDVLRKPLSLEALSE
152979029	1.34466e+06	Actinobacillus succinogenes 130Z	_ two component transcriptional regulator _	13	VLLIEDDPLIGNGLNIGLTKSGFSVDWFTDGKTGLEAVKSAPYDAVVLDLTLPKMDGLDILQQWRHDGFDVPVLILTARDTLDERVNGLQMGADDYLCKPFALAEVVARL
152978457	1.34409e+06	Actinobacillus succinogenes 130Z	_ two component transcriptional regulator _	1	ILLVDDDIELTDLLGELLSLEGFDVVTAQNGLEALEKLDDGICLVLLDVMMPGLNGIETLKRIRQKSVVPVLMLTARGDDIDRIIGLELGADDYLPKPFNDRELVARIK
152979379	1.34501e+06	Actinobacillus succinogenes 130Z	_ two component Fis family transcriptional regulator _	25	VLLIDDDPDILTAYQDLLEQEGYRVLAIANPQTIVQQIPTDWKGVVLCDVMLPRISGLTVLDEIMQSDALIPVIMITGHGDVPMAVNAVKKGATDFLEKPVSPENLLQQV
152978555	1.34418e+06	Actinobacillus succinogenes 130Z	_ two-component response regulator _	38	ILVVEDETITRNTLKSIFEAEGYHVFEATDGAQMHRVLAEHTIHLVVMDINLPGKNGLMLARELRENADIALIFLTGRDNEVDKILGLEIGADDYLTKPFNPRELTI
152978046	1.34368e+06	Actinobacillus succinogenes 130Z	_ two component LuxR family transcriptional regulator _	3	VLLIDDHPLMRRGIKQLIELDEIFEVVGDAGNGNDGISLALQLEPDLIVLDLNMKGLSGLDTLKALRNEGVDARIVILTVSDAKNDIFALIDAGADGYLLKDTEPDVLLVQL
152978536	1.34417e+06	Actinobacillus succinogenes 130Z	_ integral membrane sensor hybrid histidine kinase _	86	ILLVEDIELNILVTKSLLEKLGHRVDVAMTGEEAINRFEKNDYDLVLLDIQLPDMSGFEVAHFLRRGYETGLYDYLPPLVALTANVMQDKSVFRVKGMDDVLRKPLSVAALTE
117618541	856712	Aeromonas hydrophila subsp. hydrophila ATCC 7966	_ PAS _	0	VLLVEDNAINREVVLELLNNSGLVIETAVNGQEALERVSQHAFDLILMDIQMPLMDGYSATRAIRALPGWEQVPILALTASAFEEDRKACESAGMNDFIAKPVTPAKLFEAL
117618531	YP	Aeromonas hydrophila subsp. hydrophila ATCC 7966	_854948.1_ hybrid sensory kinase _	0	ILLAEDNELNQQVALELLRAVGADVSIAGNGAIALEMVAQTHYDLILMDMQMPVMDGLAATRLLREREDVGQHTPILAMTANVMAGDRERCLAAGMDDHIAKPIDPDRLYAAL
117617779	YP	Aeromonas hydrophila subsp. hydrophila ATCC 7966	_856943.1_ sensory box histidine kinase/response regulator _	0	VLLAEDNRVNQQLIIEYLRRVDALVTVVGNGREAVERVAEQPFDVILMDLQMPVLDGLDATRQIRKMVDKHDVPIIALTASAMPGDRERCLGVGMNGYVTKPVSKLDLYNN
117618949	YP	Aeromonas hydrophila subsp. hydrophila ATCC 7966	_856744.1_ two-component system sensor protein _	0	ILLVDDSDINLEVATRLLQREGAEVITAIDGERALTCLADPAQRIDLVLMDVQMPVMDGYEATRRLRQLPGHKETPVLALTAGVFKDQREAALACGMNDFIAKPLDVEQLIATL
117619924	857513	Aeromonas hydrophila subsp. hydrophila ATCC 7966	_ virulence sensor protein BvgS _	0	VLVVDDNHANQVLLRQQLKHLGHEVSVRGNGAEALRAIQNQDFELIITDCQMPLMDGFELTRRLRARGHTLPIWGFTAHATARERERCLAAGMDECLYKPIGLARLRTAL
117619875	855359	Aeromonas hydrophila subsp. hydrophila ATCC 7966	_ hybrid sensory histidine kinase BarA _	0	VLAVDDNAANLKLIAAMLKEMVSQVVVCKNGKEAVRLAQSQPFDIIFMDIQMPIMDGISATQAIRSQSLNTETPIVAVTAHAILGERERLIRQGMDDYLAKPIDEAMLAKLI
117618284	856115	Aeromonas hydrophila subsp. hydrophila ATCC 7966	_ sensor protein LuxQ _	0	VLVVEDSPVNQLVVSLMLQKLVSRVRVAANGLEALAQVAEQLPDLILMDMRMPQMDGLEATRRLRELGCSVPIVALTANAMAEDRARCLAQGMDDFLAKPISLMRLREC
117620577	856843	Aeromonas hydrophila subsp. hydrophila ATCC 7966	_ PAS, putative _	0	VLLVEDHEVNRVLISMQLTQLGARVISAANGQLALDILQHETVDLVLTDLQMPVMDGAELCRQLRDSPRWQHLPTYVITADLSEQAAAQLASCGCRGHLDKPLLLKDLAN
117618906	855570	Aeromonas hydrophila subsp. hydrophila ATCC 7966	_ response regulator/sensor histidine kinase _	0	LLVVEDHHLNQVLVQRQLKQLNLQCDLAENGRQALAMLTFHRYDLILCDCQMPVMDGYEFTRRVRATEGLAQLPIIAMTANVLPEQAQRCLAAGMNDVLGKPVLMDGLRQM
117620646	855451	Aeromonas hydrophila subsp. hydrophila ATCC 7966	_ virulence sensor protein BvgS, putative _	0	VLVADDHPINRALLARQLAILGVDAEVVDDGDKALRTWQGQAFALLLTDCHMPVMDGYSLTRALRAQGESAPVIGVTADTSEEASLQMQEAGMNDMLFKPYTLETLHQML
117617735	857328	Aeromonas hydrophila subsp. hydrophila ATCC 7966	_ transcriptional activator _	119	ILVVEDDNGLREALVDTLLLGGYECREVDSGERALLALSRQSFDMVISDIQMGGMDGLTLLANIRQQYPQVPVLLMTAYANIDGAVRAMREGAIDYLAKPFSPEVLLNQV
117618227	854835	Aeromonas hydrophila subsp. hydrophila ATCC 7966	_ transcriptional regulator OmpR _	11	VLVVDDDLKLRSLLERYLTEQGFVVRGVANGEQADRLLTRENFSLMVLDLMLPGEDGLSICRRLREAGNQIPVLMLTAKGDEVDRIVGLEMGADDYLPKPFNPRELLARI
117619543	855794	Aeromonas hydrophila subsp. hydrophila ATCC 7966	_ phosphate regulon transcriptional regulatory protein PhoB _	12	ILVVEDEAPIREMLCFVLEQKGYETVEAEDFADGLAKVREPYPELIVLDWMMPGGSGIQFIKQLKQDEVTRQIPVVMLTARGEEEDKVRGLEAGADDYITKPFSPKELTARL
117617713	854588	Aeromonas hydrophila subsp. hydrophila ATCC 7966	_ positive transcription regulator EvgA _	139	ILVVDDHPAIRMAVNILLQQDDHHIVAEVDNGVDAVLMARKYQPDMVVLDIGIPRLDGIEVIKRLKEMDADIKVVILSAQATHHIMVRCLQAGANGFISKL
117618787	857713	Aeromonas hydrophila subsp. hydrophila ATCC 7966	_ DNA-binding response regulator _	13	ILLVEDDVMLGDGMVDALRSSGYTVDWLQQGLPALSVLKSEEFAALILDLNLPDIDGISLLRKLRREGQTLPVLILTARDALDDRVLGLDAGSDDYMVKPFALQELNARL
117621297	858281	Aeromonas hydrophila subsp. hydrophila ATCC 7966	_ chemotaxis protein CheV _	144	ILVVDDSAFIRKMIETTLRTAGYNVVTAKDGGDGLEMLMEFDRLSQEEKIPVAEFVSGIITDVEMPRMDGMHLLKRLRDTPAFKTTPIVMFSSLMSDDNRHKALQLGANDTITKPE
117621451	858400	Aeromonas hydrophila subsp. hydrophila ATCC 7966	_ DNA-binding response regulator _	147	ILVVDDHSEIRDLLKRFLEQHGLRVSCARDGKEMKRLLEEREFDLLVLDLMMPGEDGLTLCRELRAKSSLPIIMLTAMGEETDRIIGLEMGADDYLAKPFNPRELLARIK
117619332	854542	Aeromonas hydrophila subsp. hydrophila ATCC 7966	_ KDP operon transcriptional regulatory protein KdpE _	19	ILVIDDEAAIRRFLRISLIAEGHQVSEAVGVNEGLAQYRHLNPDLVILDLGLPDGDGIQVLQAIREHHQHPVLVLSARDSEQEKVRLLDAGANDYMSKPFGIGEMMARI
117617885	858673	Aeromonas hydrophila subsp. hydrophila ATCC 7966	_ transcriptional regulatory protein CreB _	1	IWLVEDEASIADTLIYALQTDGFEVEWFMLGQQLLTRLEQTRPDFLILDVGLPDISGFELCKQVRVLTDIPLMFLTARSEEIDRLIGLEIGADDYVAKPFSPREVCARV
117618843	855862	Aeromonas hydrophila subsp. hydrophila ATCC 7966	_ two-component response regulator _	1	VLIAEDEAEIADILAAYLQRHGLRTLHAADGREALAMHQTCKPDLLLLDVQMPQLDGWQVLSEIRARGDMPVIMLTALDQDLDKLMGLRMGADDYVVKPFNPAEVVARVQ
117617624	858615	Aeromonas hydrophila subsp. hydrophila ATCC 7966	_ DNA-binding transcriptional regulator RstA _	1	ILFVEDDPEIGQLISSWLARHDMEVLLEPRGDLALARVEAEQPDLVLLDIMLPGQDGLSLCRDLRPRFAGPIVMLTSLDSDMNQILSLELGANDYILKTTPPPVLLARL
117621514	855892	Aeromonas hydrophila subsp. hydrophila ATCC 7966	_ transcriptional regulatory protein PhoP _	20	ILLVEDDKLLNHHLSTLLTEAQNQVHSTDSAQVALHYAADYPIDVAIIDLGLPDMDGLQLIRQLREQQIPFPIIVLTARGNWQDKVEGLEAGADDYLVKPFQKDELLARL
117618398	858477	Aeromonas hydrophila subsp. hydrophila ATCC 7966	_ two-component system, regulatory protein _	20	ILIVEDEKTLAGQLAEQLRLSGFVTDLCHDGNEAGFLGETEPYDAIILDLGLPGRDGLSVLKEWRSKGIDTPVLVLTARGQLHEKIEGLNAGADDYLTKPFQVAELVARV
117617775	855754	Aeromonas hydrophila subsp. hydrophila ATCC 7966	_ positive regulator AgmR _	21	IVIADDHPLFRGALYQAVHMAIDDAQLLEADSIDSLAHLLGEHPEVDLLLLDLKMPGANGFSGLAHLRGQYPDLPIVVVSASEEPTIIQQVLRLGALGFIPKSAPMKELVNALN
117617728	857964	Aeromonas hydrophila subsp. hydrophila ATCC 7966	_ chemotaxis protein CheV _	22	VLIVDDSSTARNLVRETLGQLGLEVIECQDGLQALNLLKGWCDAGKKVTDEILLMITDAEMPEMDGYRLTHEIRSDARMSDLFITLNTSLSGNFNEAMVKKVGCDRFISKFQP
117620850	855543	Aeromonas hydrophila subsp. hydrophila ATCC 7966	_ chemotaxis protein CheV _	22	ILLVDDSSVARRQLMAALDYINIPYEVCTNGKDALTLMQTRASQKTPIDILVSDIEMPGLDGYELAFEVQSDAKLAGAYIILHTSLSSEISVERAHQVGAHEALTKFEANELIQA
117618526	857348	Aeromonas hydrophila subsp. hydrophila ATCC 7966	_ CheV _	22	VLVADDSSVARKQVQRALEAIGVQCVLAKDGREALNMLLEMSKNGPIKDQIALVISDIEMPEMDGYTFTAEIRNNPNLKDLHVILHTSLSGVFNQAMVQKVGANNFIAKFQPDELAKAV
117619711	857040	Aeromonas hydrophila subsp. hydrophila ATCC 7966	_ hypothetical protein AHA_2527 _	23	ILVVDDSVGIRAAITMTLTSAGFEVIEAGDGEAALIELDQRRVHLIISDLNMPGMDGMTLLRRVKAQQTTRYLPFIMLTTEDSEQIKREGFEAGARVWLTKPFDPLKLLDD
117621529	855580	Aeromonas hydrophila subsp. hydrophila ATCC 7966	_ chemotaxis protein CheY _	23	VLIVDDSATIRQVVGMTLKGAGYEVMEACDGKDALKKLDGKKINLIISDVNMPNMDGISFVKEAKKLASYKFTPVIMLTTESQDSKKQEGQAAGAKAWVVKPFQPDQMLAAV
117621496	855520	Aeromonas hydrophila subsp. hydrophila ATCC 7966	_ proline sensor PrlS _	24	VLCIDNESDILIAMHSLLGRWGCEVVCAQSLAQAEDLIAGGFLPQLVLSDYHLDDGKTGLQALHMLRLAHGNDIGGIIISADRKSELQAQIREHGYGYISKPVKPLKLRA
117618408	854558	Aeromonas hydrophila subsp. hydrophila ATCC 7966	_ C4-dicarboxylate transport transcriptional regulatory protein DctD _	25	VLLVDDDEDVLESYCHLLRLSGYHPRATTSPHEALALLADQWPGVLVSDIYMPAMNGMDLLASVQALDAEIPVIMITGHGDIPLAVRAVKQGAFDFLEKPLNPQDLL
117620062	854674	Aeromonas hydrophila subsp. hydrophila ATCC 7966	_ GltR _	27	LLIVDDDQEIRELLNEYLTRAGFEVLTAAEGNEMRKLLAQHNPDLIILDIMMPGDDGFTLCQQIRRDSQVPIIMLTAASDEADRVIGLELGADDYITKPFSPRELQARIK
117619081	854802	Aeromonas hydrophila subsp. hydrophila ATCC 7966	_ nitrogen regulation protein NR_I_ _	29	VWIVDDDSSIRWVLERTLGSEGFECESFADGEALLSSLEMRSPDVILSDIRMPGIDGLSLLEQIHRRQADLPIIIMTAHSDLDSAVNAYQRGAFEYLPKPFDIDEAVTLV
117620740	856969	Aeromonas hydrophila subsp. hydrophila ATCC 7966	_ transcriptional regulatory protein CitT _	30	ILIVEDDPAIAEIHRRFVQRLAGFEVLGVALTLFDAREQIEILKPDLVLLDVWLPDGEGFALLRELRQAGASLDVILLTAAREAGALQEAMRLGVVDFILKPVVFERLRDTL
117620293	855786	Aeromonas hydrophila subsp. hydrophila ATCC 7966	_ transcriptional regulatory protein DpiA _	30	LVIEDDERIGSILAELVSSTPGFSLLGRAESLTQADLMMRAAQPQLLLVDISLPDGSGLEWVNRLRSHNREAYVIMVTASCDVETIQQALNQGVQDYIIKPLRLFRIQQ
117619500	858484	Aeromonas hydrophila subsp. hydrophila ATCC 7966	_ transcriptional regulatory protein ZraR _	37	ILLVDDDASLLKLMSMRLRSQGYEVDTADSAEGALDRLRQQRADLVLSDLRMAGMDGLALFERIQSQWLGLPVIIMTAHGTIPDAIQATRSGVFSFLTKPIDKDELFATI
117621258	855550	Aeromonas hydrophila subsp. hydrophila ATCC 7966	_ sigma-54 factor interaction domain-containing protein _	37	VLLVEDTRSLAVVYEQYLAQDGYEVLRADCGQQALAQLLSSPPPVVLLDLELPDMSGMDILQQITEQQLPCSVVVITAHGSVDVAVEAMRLGAFDFLTKPFDGKRLCA
117618149	857530	Aeromonas hydrophila subsp. hydrophila ATCC 7966	_ two-component response regulator _	38	ILIVEDELVTRNTLKSIFEAEGYIVLEANNGDEMHQALTSHTINLVIMDINLPGKNGLLLARELREDDNIALMFLTGRDNEVDKILGLEIGADDYITKPFNPRELTI
117618841	856117	Aeromonas hydrophila subsp. hydrophila ATCC 7966	_ LuxR family DNA-binding response regulator _	3	VLVVDDHPLMRKGIVQLLALEENIEVVGEASNGTDAVAMAKESEPDLILLDLNMKGLSGLDTLKALRTEEVTSRVVILTVSDARQDVVALLKAGADGYLLKDTEPEMLLAQL
117617726	855569	Aeromonas hydrophila subsp. hydrophila ATCC 7966	_ LuxR family DNA-binding response regulator _	42	IILADDHPLILTGIRSLIAQHQAGCEIVAEAHQVSELFKTLQQHHCDLLITDFSMPGDSRSDGLAMIQSLKRNYPQLSIIVLTQIQNAGILRALLQLGVSGILLKKAVISELSDAI
117618531	854948	Aeromonas hydrophila subsp. hydrophila ATCC 7966	_ hybrid sensory kinase _	52	LVADDSASARTIMAALLRSMSFVVDTAESGQQALQMIAGAEQEGQPYEVVLLDWHMPGLDGIETGRRLIARGMGQRPYRVMVTGYGREEVFRQADTAGFDRVLVKPVCASVLFDTV
117618949	856744	Aeromonas hydrophila subsp. hydrophila ATCC 7966	_ two-component system sensor protein _	52	LLIADDNQVTRDTLSMTVGSLGWQSRVVESGEQALHHLLRQGERFDVILLDWIMPGMDGLETCVAIRQAFEQQERSPIIIMATAYSQEELMRRPGSEQVDLVLHKPVTGSSLYNAV
117620574	857279	Aeromonas hydrophila subsp. hydrophila ATCC 7966	_ response regulator _	59	VFLVDDHELVRTGIRRILEDVRGIKVVGEAQSGETAVTFCRQHHPDVILMDMNMPGIGGLEATRKILRIRPDVRIIVLTIHSENPFPTKVMQAGAAGYLTKGAAPDEMIHAI
117620033	854592	Aeromonas hydrophila subsp. hydrophila ATCC 7966	_ response regulator receiver domain-containing protein _	5	IIVEDEYLAREELAYLVGQHSTIEIVASFEDGLEAFKYLQDHEVDVVFLDIQIPSIDGLLLAKNLHKSSHPPHIVFVTAYKEFAVEAFELEAFDYILKPYNEPRLISL
117620175	857128	Aeromonas hydrophila subsp. hydrophila ATCC 7966	_ putative two-component response-regulatory protein YehT _	5	LIVDDELYAREELMQHLAAEPDIELLGAAANAIEALPLIQRLKPDVVFLDIQMPKLSGMALVAMLDPLPRIVFVTAFDEYAIQAFEENAFDYLLKPVEPARLAKTL
117620303	857782	Aeromonas hydrophila subsp. hydrophila ATCC 7966	_ putative two-component response-regulatory protein YehT _	5	LIVDDEPLAREELRLLLEQTGNIRLLGECAHAMEALPAIHRLKPDLLFLDIQMPRISGLELVSMLDPDLRPHIVFITAYDEFALRAFEENALDYLLKPVTAERMNKAL
117621044	856332	Aeromonas hydrophila subsp. hydrophila ATCC 7966	_ response regulator _	61	VLICDDSGFARKQLARALPADWDVTLHYAANGLEGIEQVLMGHGDLIFLDLTMPEMDGYGVLETLQREGLRNKIFVVSGDIQPEAYQRVMGLGALDFIKKPAAPETLSAL
117617783	857995	Aeromonas hydrophila subsp. hydrophila ATCC 7966	_ response regulator _	69	VLIVDDEPDIHHATRLALSNIQYKSRPLELLNAYSGAEAARMLLANPRIALILLDVVMETEDAGLRLVHQIRNEMHNSLVRIVLRTGQPGQAPEQRVILDYDINDYKTKTE
117618434	857046	Aeromonas hydrophila subsp. hydrophila ATCC 7966	_ chemotaxis-specific methylesterase _	6	VLIVDDSALVREVLTQMLSKAEDIEVIGAAFDPIFAMQQMKKCWPDVIILDIEMPRMDGLTFLKKIMAEHPTPVIICSSLTEEGAMITLEAMSAGAISIVTKPS
117620959	855572	Aeromonas hydrophila subsp. hydrophila ATCC 7966	_ chemotaxis-specific methylesterase _	6	VMLVDDSAVVRQVLQAILEQEPDIKVIATASDPLFALEKLKKEWPDVIVLDVEMPRMDGITFLTKIMAEHPTPVVICSSLTEKGAETTLQAMAAGAVDIITKPT
117618143	855925	Aeromonas hydrophila subsp. hydrophila ATCC 7966	_ chemotaxis-specific methylesterase _	6	VLVVDDSSFFRRRVSEIITQDPMLTVIDTAQNGREAVDKAIQLRPDVITMDIEMPVMDGISAVREIMAKCPTPILMFSSLTHEGAKATLDALDAGALDFLPKKFED
117618556	854589	Aeromonas hydrophila subsp. hydrophila ATCC 7966	_ virulence sensor protein BvgS _	72	VMIVDDHPTNRLLVSQQLAYLGHDATAAESGREALALFANTPFDVMITDFNMPGMSGFELTRQYRALELSRGTHRCLILGLTADARQEQVSEGLTAGMDDCLFKPVGLEEL
117619488	YP	Aeromonas hydrophila subsp. hydrophila ATCC 7966	_856393.1_ response regulator protein _	77	VLVVDDSRTSRHRTMAQLRKQLLQVHEASHAREALAQLEQNPAIRLVLVDYYMPEIDGISLVRMLRERYSKQQLAIIGISVSDKRGLSARYLKQGANDFLNQPFEPEELQCR
117620485	855300	Aeromonas hydrophila subsp. hydrophila ATCC 7966	_ transcriptional regulatory protein CpxR _	79	ILLVDDDLELGTMLSEYLSGEGFATTHVLTGKSGVQHALSGNYAAVVLDIMLPDLNGSEVLRQIRRDSRIPVIMLTAKGDNIDRVIGLEMGADDYVPKPCYPRELVARL
117618753	855922	Aeromonas hydrophila subsp. hydrophila ATCC 7966	_ chemotaxis protein CheY _	7	ILIVDDFSTMRRIIKNLLRDLGFNNTHEADDGNTALPMLKNGDFQFVVTDWNMPGMQGIDLLKAIRVDDKLKHLPVLMVTAEAKREQIIEAAQAGVNGYIVKPFTAATLKEKL
117617705	857460	Aeromonas hydrophila subsp. hydrophila ATCC 7966	_ TPR repeat-containing response regulator _	7	ILLVNEQRSFQVMMKAMLINIGISRITYANSAEEARRRCQKETFDIYLLDYELGVGENGRQLLESLRDQKLIPPQSVVIMVSGDSSRAMVLSALEAEPDEYLMKPFSQEQF
117619094	855452	Aeromonas hydrophila subsp. hydrophila ATCC 7966	_ response regulator _	7	IMVVEDHAFQRKALMHQIRGLGYGSLLEAQDGVEALAMCQRHQVDILFCDLRMPGMDGMALLRRLSLGGFRGGIILSSALEDDVVEAVLRMSAAYGLQVLGRIEKPSSQQQISQ
117621114	857047	Aeromonas hydrophila subsp. hydrophila ATCC 7966	_ response regulator _	7	MVVDDSRTQQYEVTCLLQELGFGQIHVAHDGQDALNKLQQLERIDLLLTDLNMPGMDGVELISNLEKNTHYRMFVAVMSGVERDVLDVIHAIADASTLEVIGVLSKPLRQSDLRNML
117619488	856393	Aeromonas hydrophila subsp. hydrophila ATCC 7966	_ response regulator protein _	84	ILIVEDSLTIRRMLIQAIAQQTGLEIDAFDTLEGARHCRGEEYVVALVDLTLPDAPSGEAVKVLLERGLPVVILTADISEEKRAAWLEAGVLDYVMKDS
117618265	855448	Aeromonas hydrophila subsp. hydrophila ATCC 7966	_ aerobic respiration control sensor protein ArcB _	86	ILLVEDVELNVTVACALLNKLGHEVKVARDGAQALAMANPDDFDLILLDIQLPDMTGFDVAEQLLARYGDSLPPMVALTANATGDRQYYRDHGMQDVINKPLGSKAVRE
117618089	857575	Aeromonas hydrophila subsp. hydrophila ATCC 7966	_ acetoacetate metabolism regulatory protein AtoC _	89	LLIVDDEPGMRSFLAKALARRFAQIETAASVEEAEALRCRLHFDLIIADIRLPGRSGIEWHEAIDPATRRSDIIFMTGFGDMETALKALRLGASDFILKPFNLDQMVQAV
117621097	856714	Aeromonas hydrophila subsp. hydrophila ATCC 7966	_ response regulator receiver _	8	ILIVDDSPENLMVLTDLLSPTYRVLAAQSGEKCLRIATGKTIPDLILLDVMMPGMDGYEVLKQLRITPATSRIPVVLLTALADPQSEEYGLSLGAADYITKPIKPAIVQARV
117621547	854947	Aeromonas hydrophila subsp. hydrophila ATCC 7966	_ regulatory components of sensory transduction system _	8	LLVVDDTPENLSLLSALLSPHYRVKVAISGQRALEILSAGTRVDLILLDVVMPQMDGYQVMQALQEMPQAREIPVIFLTAKVEESAEAHGLALGAVDYIHKPITPAIVLARV
117621536	856745	Aeromonas hydrophila subsp. hydrophila ATCC 7966	_ two-component system regulatory protein _	8	VLIIDDEPSNLGLLRQILKEEYSLFFAKGGEEGLAAVARHEPALILLDVRMPDMDGYEVCRRLKADPAHAGIPVLFITASDNPDSESQGFEAGGVDYIYKPVCPSTVRARV
117617851	857301	Aeromonas hydrophila subsp. hydrophila ATCC 7966	_ DNA-binding transcriptional activator UhpA _	97	IALIDDHQIVRSGFAQLLNLEPDLRVVAEFGSAAEALAGLPGSGVQLCVCDISMPDQSGLDLLKRLPSGLAVVMLSVHDSPALIEQALQAGAKGFLSKRCSPDELIAAVR
117617672	857780	Aeromonas hydrophila subsp. hydrophila ATCC 7966	_ transcriptional regulatory protein FixJ _	9	LVDDDEAVLDSLRFMLESCDERQLFSFADGERFLAEVDLHQPACLILDCRMPGLSGPEVQQRLKAAQSPIAILFLTGHGEVPLAVESLKLGAVDFLQKPVQLAPLLAAI
145299243	YP	Aeromonas salmonicida subsp. salmonicida A449	_001142084.1_ two-component system hybrid sensor histidine kinase/response regulator _	0	VLLTEDNRVNQQLIIEYLRRIDAVVTVVGNGREAVERVAEQPFDVILMDLQMPVLDGLDATRQIRKMVDKHDVPIIALTASAMPGDRERCLGVGMNGYVTKPVSKLDLYNN
145300355	1.1432e+06	Aeromonas salmonicida subsp. salmonicida A449	_ hybrid sensory histidine kinase BarA _	0	VLAVDDNAANLKLIAAMLKEMVSQVVVCKNGKEAVRLAQSQPFDIIFMDIQMPIMDGISATQAIRSQSLNTETPIVAVTAHAIPGERERLIRQGMDDYLAKPIDESMLAQLI
145299082	1.14192e+06	Aeromonas salmonicida subsp. salmonicida A449	_ two-component system hybrid sensor histidine kinase/response regulator _	0	VLLVEDNAINREVVLELLNNSGLIIETAVNGQEALERVSQHPFDLILMDIQMPLMDGYTATRAIRTLPGWEQTPILALTASAFEEDRKACKAAGMNDFIAKPVTPAKLFEAL
145299703	1.14254e+06	Aeromonas salmonicida subsp. salmonicida A449	_ two-component system hybrid sensor histidine kinase/response regulator _	0	VLVVEDSPVNQLVVSLMLQKLVTRVRVAANGLEALAQVAEQKPDLILMDMRMPQMDGLEATRRLRELGCKMPIVALTANAMAEDRARCLAQGMDDFLAKPISLMRLREC
145300169	1.14301e+06	Aeromonas salmonicida subsp. salmonicida A449	_ two-component system hybrid sensor histidine kinase/response regulator _	0	LLVVEDHHLNQVLVQRQLKQLNLVCDLAENGQQALAMLAQHSYDLILCDCQMPVMDGYDFTCQVRTVEGLARLPIIAMTANVMPEQAQRCLAAGMNDVLGKPVLLDGLRQ
145300783	YP	Aeromonas salmonicida subsp. salmonicida A449	_001143624.1_ two-component system hybrid sensor histidine kinase/response regulator protein _	0	ILLAEDNELNQQVAMELLRAVGADVSIAGNGAIALQMAAQQPYDLILMDMQMPVMDGLAATRQLRQQESDGHQIPILAMTANVMAGDRERCLAAGMDDHIAKPIDPDKLYAAL
145298504	1.14135e+06	Aeromonas salmonicida subsp. salmonicida A449	_ two-component system flagellar response regulator FlrC _	119	ILVVEDDNGLREALVDTLLLGGYECREADSGERALLALSRQSFDMVISDIQMGGMDGLTLLAAIRQQYPQIPVLLMTAYANIDGAVRAMREGAIDYLAKPFSPEVLLNQV
145300939	1.14378e+06	Aeromonas salmonicida subsp. salmonicida A449	_ two-component system osmolarity response regulator OmpR _	11	VLVVDDDLKLRSLLERYLTEQGFVVRGVANGEQADRLLTRENFSLMVLDLMLPGEDGLSICRRLREAGNQIPVLMLTAKGDEVDRIVGLEMGADDYLPKPFNPRELLARI
145298254	1.1411e+06	Aeromonas salmonicida subsp. salmonicida A449	_ two-component system response regulator PhoB _	12	ILVVEDEAPIREMLCFVLEQKGYETIEAEDYADGLAKVCEPYPELIVLDWMMPGGSGIQFIKQLKQDEVTRQIPVVMLTARGEEEDKVRGLEAGADDYITKPFSPKELTARL
145297176	1.14002e+06	Aeromonas salmonicida subsp. salmonicida A449	_ two-component system response regulator _	139	VLIVDDHPAIRMAVKILLLAEGFHICGEVDNGIDALQIVKASTPNIVVLDIGIPKLDGIDVINRIKKSNSQSLIVVLSAQDGNHIMSRCFQAGANGFISKMDDLMLLS
145298120	1.14096e+06	Aeromonas salmonicida subsp. salmonicida A449	_ two-component system response regulator _	13	ILLVEDDVMLGDGMVDALRSSGYTVDWLQQGLPALSVLKSEEFAALILDLNLPDIDGISLLRKLRREGQVLPVLILTARDALDDRVLGLDAGSDDYMVKPFALQELNARL
145297541	1.14038e+06	Aeromonas salmonicida subsp. salmonicida A449	_ two-component system chemotzxis response regulator _	144	ILVVDDSAFIRKMIETTLRTAGYNVVTAKDGGEGLEMLTEFDRLSQEEKIPVSEFVSGIITDVEMPRMDGMHLLKRLRDTPAFKTTPIIMFSSLMSDDNRQKALQLGANDTITKPE
145300860	1.1437e+06	Aeromonas salmonicida subsp. salmonicida A449	_ OmpR family two-component response regulator _	147	ILVVDDHSEIRDLLKRFLEQHGLRVSCARDGKEMKRLLEEREFDLLVLDLMMPGEDGLTLCRELRAKSCMPIIMLTAMGEETDRIIGLEMGADDYLAKPFNPRELLARIK
145297137	1.13998e+06	Aeromonas salmonicida subsp. salmonicida A449	_ two-component system potassium response regulator KdpE _	19	ILVIDDEAAIRRFLRISLIAEGHQVSEAVGVNEGLELYRHLNPDLVILDLGLPDGDGIQILQAIREHHQNPVLVLSARDSEQEKVRLLDASANDYMSKPFGIGEMMARI
145301166	1.14401e+06	Aeromonas salmonicida subsp. salmonicida A449	_ two-component system blr regulon response regulator _	1	IWLVEDEASIADTLIYALQTDGFEVEWFPLGQPLLTRLEQTRPDFLILDVGLPDISGFELCKQVRARCDTPLMFLTARSEEIDRLIGLEIGADDYVAKPFSPREVCARV
145297240	1.14008e+06	Aeromonas salmonicida subsp. salmonicida A449	_ DNA-binding transcriptional regulator RstA _	1	ILFVEDDPEIGQLISSWLARHDIDVLLEPRGDMALARIEAEQPDLVLLDIMLPGQDGLSLCRDLRPRFKGPIVMLTSLDSDMNQILSLELGANDYILKTTPPPVLLARL
145298334	1.14118e+06	Aeromonas salmonicida subsp. salmonicida A449	_ two-component system responsse regulator PhoP _	20	ILLVEDDKLLNHHLATLLTEAQNQVHSTDNAQVALHYATDYPIDVAIIDLGLPDMDGLQLIRQLRERQIPFPIIVLTARGNWQDKVEGLEAGADDYLVKPFQKDELLARL
145297360	1.1402e+06	Aeromonas salmonicida subsp. salmonicida A449	_ two-component system response regulator _	20	ILIVEDEKTLAGQLAEQLRLSGFVTDLCHDGNEAGFLGETEPYDAIILDLGLPGRDGLSVLKEWRSKGIDTPVLVLTARGQLHEKIEGLNAGADDYLTKPFQVAELVARVQ
145300026	1.14287e+06	Aeromonas salmonicida subsp. salmonicida A449	_ LuxR family transcriptional regulator _	21	IVIADDHPLFRGALYQAVHMAINDAQLLEADSINSLTSLLGEHPEVDLLLLDLKMPGANGFSGLAHLRGQYPDLPIVVVSASEDAAIIQQVLRLGALGFIPKSVPMKELVNALN
145297883	1.14072e+06	Aeromonas salmonicida subsp. salmonicida A449	_ two-component system chemotaxis response regulator CheV _	22	VLIVDDSSTARNLVRETLAQLGLEVIECQDGLEALNLLKGWCDAGKKVTDEILLMITDAEMPEMDGYRLTHEIRSDARMSDLFITLNTSLSGNFNEAMVKKVGCDRFISKFQ
145300191	1.14303e+06	Aeromonas salmonicida subsp. salmonicida A449	_ two-component system chemotaxis response regulator CheV _	22	ILLVDDSSVARRQLMAALDYINIPYEVCTNGKDALALMQARASQKTPIDILVSDIEMPGLDGYELAFEVQSDATLAGAYIILHTSLSSEISVERAHQVGAHEALTKFEANEMVQA
145298486	1.14133e+06	Aeromonas salmonicida subsp. salmonicida A449	_ two-component system chemotaxis response regulator CheV _	22	VLVADDSSVARKQVQRALEAIGVQCVLAKDGREALNMLLEMAKNGPIKDQIALVISDIEMPEMDGYTFTAEIRNNPNLKDLHVILHTSLSGVFNQAMVQKVGANNFIAKFQPDELAKAV
145300160	1.143e+06	Aeromonas salmonicida subsp. salmonicida A449	_ two-component system chemotaxis response regulator CheY _	23	DDSATIRQVVGMTLKGAGYEVMEACDGKDALRKLDGKKINLIISDVNMPNMDGISFVKEAKKLANYKFTPVIMLTTESQDSKKQEGQAAGAKAWVVKPFQPDQMLAAV
145301083	1.14392e+06	Aeromonas salmonicida subsp. salmonicida A449	_ two-component system response regulator _	27	LLIVDDDQEIRELLNEYLTRAGFQVLTAAEGNEMRQQLALHSPDLIILDIMMPGDDGFTLCQQIRRDSQVPIIMLTAASDEADRVIGLELGADDYIAKPFSPRELQARIK
145300970	1.14381e+06	Aeromonas salmonicida subsp. salmonicida A449	_ two-component system nitrogen response regulator _	29	VWIVDDDSSIRWVLERTLGSEGFECESFADGEALLSSLEIRSPDVILSDIRMPGIDGLSLLEQIHRRQADLPIIIMTAHSDLDSAVNAYQRGAFEYLPKPFDIDEAVTLV
145299269	1.14211e+06	Aeromonas salmonicida subsp. salmonicida A449	_ two-component system citrate/malate response regulator, CitB _	30	ILIVEDDPAIAEIHRRFVQRLAGFEVLGVTLTLFDAREQIGILKPDLVLLDVWLPDGEGFALLRELRQAGACLDVILLTAAREAAALQEAMRLGVVDFILKPVVFERLRDTL
145298249	1.14109e+06	Aeromonas salmonicida subsp. salmonicida A449	_ two-component system response regulator _	30	LVIEDDERIGSILAELVSSTPGFSLLGRAESLTQADLMMRATEPQLLLVDISLPDGSGLEWVNRLRSHNREAYVIMVTASCDVETIQQALNLGVQDYIIKPLRLFRIQQ
145297354	1.1402e+06	Aeromonas salmonicida subsp. salmonicida A449	_ two-component system response regulator _	37	ILLVDDDVSLLKLMSMRLRSQGYEVDTADSAEGALDRLRQQRADLVLSDLRMAGMDGLALFERIQSQWLGLPVIIMTAHGTIPDAIQATRSGVFSFLTKPIDKDELFATI
145300184	1.14303e+06	Aeromonas salmonicida subsp. salmonicida A449	_ two-component system response regulator LuxO _	37	VLLVEDTRSLAVVYEQYLAQDGYEVLLADCGQQALAQLLTSPPPVVLLDLELPDMSGMDILQQITEQQLPCSVVVITAHGSVDVAVEAMHLGAFDFLTKPFDGKRLCAT
145299955	1.1428e+06	Aeromonas salmonicida subsp. salmonicida A449	_ two-component response regulator _	38	ILIVEDELVTRNTLKSIFEAEGYVVLEANNGDEMHQALTAHTINLVIMDINLPGKNGLLLARELREDDNIALMFLTGRDNEVDKILGLEIGADDYITKPFNPRELTI
145299701	1.14254e+06	Aeromonas salmonicida subsp. salmonicida A449	_ two-component system nitrate/nitrite response regulator NarP _	3	VLVVDDHPLMRKGIVQLLALEENIEVIGEASNGTDAVAMAKESEPDLILLDLNMKGLSGLDTLKALRTEEVTSRVVILTVSDARQDVVALLKAGADGYLLKDTEPEMLLAQL
145297442	1.14028e+06	Aeromonas salmonicida subsp. salmonicida A449	_ two-component system lateral flagellar response regulator _	4	AQGYAVSCVDSIKKSKFILADNSVALILLDIDVMTEAGPQLVHEFCDVDCVILVNEQQAYLAAEAMRAGAIDYIVKPFGCQQMLDAVR
145300783	1.14362e+06	Aeromonas salmonicida subsp. salmonicida A449	_ two-component system hybrid sensor histidine kinase/response regulator protein _	52	LVADDSASARTILAALLRSMSFVVDTAESGQQALQMIASAEQEGNAYEVVLLDWHMPGLDGIETGRRLIARGLGKRLYRVMVTGYGREEVFREAQSAGFDRVLVKPVCASVLFDTI
145298550	1.14139e+06	Aeromonas salmonicida subsp. salmonicida A449	_ response regulator _	59	VFLVDDHELVRTGIRRILEDVRGIKVVGEAQSGETAVTFCRQHHPDVILMDMNMPGIGGLEATRKILRIRPDVRIIVLTIHSENPFPTKVMQAGAAGYLTKGAAPDEMIHAI
145297181	1.14002e+06	Aeromonas salmonicida subsp. salmonicida A449	_ two-component system response regulator _	5	IIVEDEYLAREELAYLVGQHSQIEIVASFEDGLEAFKYLQDHEVDVVFLDIQIPSIDGLLLAKNLHKSSHPPHIVFVTAYKEFAVEAFELEAFDYILKPYNEPRIINLL
145298680	1.14152e+06	Aeromonas salmonicida subsp. salmonicida A449	_ two-component response-regulatory protein YehT _	5	LIVDDELYAREELALHLGQDPDIEILGQAANAIEALPLIQRLKPDVVFLDIQMPKLSGMELVAMLDPLPRIVFVTAFDEYAIQAFEENAFDYLLKPVEPARLAKTL
145298741	1.14158e+06	Aeromonas salmonicida subsp. salmonicida A449	_ two-component system response regulator _	61	VLICDDSGFARKQLARALPADWDVTLHYAANGLEGIEQVLMGHGDLIFLDLTMPEMDGYGVLETLQQEGLRNKVFVVSGDIQPEAHQRVMSLGALDFIKKPAAPETLTALL
145297853	1.14069e+06	Aeromonas salmonicida subsp. salmonicida A449	_ response regulator _	69	VLIVDDEPDIHHATRLALSNIQYKSRPLELLNAYSGAEAARMLLANPRIALILLDVVMETEDAGLRLVHQIRNEMHNSLVRIVLRTGQPGQAPEQRVILDYDINDYKTKT
145300167	1.14301e+06	Aeromonas salmonicida subsp. salmonicida A449	_ chemotaxis-specific methylesterase _	6	VMLVDDSAVVRQVLQAILEQEPDIKVIATASDPLFALEKLKKEWPDVIVLDVEMPRMDGITFLTKIMAEHPTPVVICSSLTEKGAETTLQAMAAGAVDIITKPT
145298367	1.14121e+06	Aeromonas salmonicida subsp. salmonicida A449	_ chemotaxis-specific methylesterase _	6	VLVVDDSSFFRRRVSEIINQDPMLTVIDTAQNGREAVDKALALRPDVITMDIEMPVMDGISAVREIMAKCPTPILMFSSLTHEGAKATLDALDAGALDFLPKKFED
145299391	YP	Aeromonas salmonicida subsp. salmonicida A449	_001142232.1_ two-component response transcriptional regulator _	77	VLVVDDSRTSRHRTMAQLRKQLLLVHEASHAREALTTLEQNPAIRLVLVDYYMPEIDGISLVRMLRERYSKQQLAIIGISVSDKRGLSARYLKQGANDFLNQPFEPEELQCR
145300465	1.14331e+06	Aeromonas salmonicida subsp. salmonicida A449	_ OmpR family two-component response regulator _	79	ILLVDDDLELGTMLSEYLGGEGFVTTHVLTGKSGVQHALSGNYVAVVLDIMLPDINGSEVLRQIRHDSKIPVIMLTAKGDNIDRVIGLEMGADDYVPKPCYPRELVARL
145298364	1.14121e+06	Aeromonas salmonicida subsp. salmonicida A449	_ chemotaxis protein CheY _	7	ILIVDDFSTMRRIIKNLLRDLGFNNTHEADDGNTALPMLKNGDYQFVVTDWNMPGMQGIDLLKAIRVDDKLKHLPVLMVTAEAKREQIIEAAQAGVNGYIVKPFTAATLKEKL
145299391	1.14223e+06	Aeromonas salmonicida subsp. salmonicida A449	_ two-component response transcriptional regulator _	84	ILIVEDSMTIRRTLIQAIAQQTGLEIDAFDTLEGARHCQGDEYVVALVDLTLPDAPSGEAVKVLLERGLPVVILTADISEDKREAWLEAGVLDYVMKDS
145300269	1.14311e+06	Aeromonas salmonicida subsp. salmonicida A449	_ aerobic respiration control sensor protein ArcB _	86	ILLVEDVELNVTVACALLNKLGHEVKVARDGAQALAMANPDDFDLILLDIQLPDMTGFDVAAQLLARYGDSLPPMVALTANATGDRQYYRDRGLQDVISKPLGSRAVRE
145300784	1.14363e+06	Aeromonas salmonicida subsp. salmonicida A449	_ two-component system response regulator _	8	LLVVDDTPENLSLLSALLGPHYRVKVAISGQRALEILSSGTRVDLILLDVVMPQMDGYQVMQALQEMPQARHIPVIFLTAKVEESAEAHGLALGAVDYIHKPISPAIVLARV
145299080	1.14192e+06	Aeromonas salmonicida subsp. salmonicida A449	_ two-component system response regulator _	8	ILIVDDSPENLMVLTDLLSPTYRVLAAQSGEKCLRIATGKTLPDLILLDVMMPGMDGYEVLKQLRTNPETSRIPVVLLTALADSQSEEYGLSLGAADYITKPIKPAIVQARV
145298529	1.14137e+06	Aeromonas salmonicida subsp. salmonicida A449	_ DNA-binding transcriptional activator UhpA _	97	IALIDDHQIVRSGFAQLLNLEPDLKVVAEFGCAADALAGLPGSGVQLCVCDISMPDQSGLDLLKLLPSGLAVVMLSVHDSPALIEQALQAGAKGFLSKRCSPDELIAAVR
222085026	2.54356e+06	Agrobacterium radiobacter K84	_ two-component sensor histidine kinase protein _	0	ILVAEDNDINQIVFSQILEGLGYRYMIAPNGDEAVRLWNEHRPELVLMDISLPGLNGFEAARLIRRSDKESGTHTPIIGVLTQAFERDRKECADAGMDDVILKPVSPDIL
222082058	YP	Agrobacterium radiobacter K84	_002541423.1_ two-component sensor histidine kinase/response regulator hybrid protein _	0	ILLVEDNEINLELAQIILTDGGLNVDTAENGLIAVRKVLEAGDRYDAVLMDLQMPELGGIDATREIRAGLGDQWLPIIAMTAHAYEAERQNCLAAGMNDHISKPLDPAQLLAAL
222086713	YP	Agrobacterium radiobacter K84	_002545247.1_ two-component sensor histidine kinase/response regulator hybrid protein _	0	VLVAEDNEVNQIVFTQILQVTGLRFLVVQNGQEAVDAWLKLRPSLIMMDVSMPVMNGHQATRTIRQLEAEAGLGCHVPIVGVTAHALDVDRDMCLEAGMDDYMSKPISPELLEAKV
222085319	2.54385e+06	Agrobacterium radiobacter K84	_ two-component response regulator protein _	10	ILIIEDDLEAAAYLTKAFREAGIVADHASDGESGLFMGTENAYDVAIIDRMLPRRDGLSVISELRRKGVHTPVLILSALGQVDDRVTGLRAGGDDYLPKPYAFSELLARV
222086834	2.54537e+06	Agrobacterium radiobacter K84	_ two-component response regulator protein _	114	MITDTSDVVRKVGKRILSELDFLVSEAGDAREALARCQAEIPDYLIVDAGMEGALELISSIRAMPNGKDVKIYYCVIEADLRKLMAGKRAGATDFLLKPFDRKILT
222082050	2.54142e+06	Agrobacterium radiobacter K84	_ two-component response regulator protein _	11	ILIVEDDAQIAGMVRDSLSEQGMLVEVAADSAVMDTKMRALDFDLVVLDVMLPGEDGFSICRRLRASSDIPILMLTSVSSDIDRVVGLEIGADDYVTKPFVLRELTARIK
222082467	2.54183e+06	Agrobacterium radiobacter K84	_ two-component response regulator protein _	11	VLIVDDDHEIRALLSRYLEEQGFRVSTASDLRGCNDALNRRAPDLLVLDVMLPDGSGLDLCRDLRNRRPRVPVILLTALKEDIDRILGLEIGADDYLGKPFNPRELAARI
222086579	2.54511e+06	Agrobacterium radiobacter K84	_ two-component response regulator protein _	11	LLVVDDDTRIRALLNRYLMEKGFRVTVAAEGAEARRKLEGLDFDLIIMDVMMPGESGIVLTSSLRAIKNIPIIMLTALAEADARIAGLEAGADDYLPKPFDPRELVLRI
222084784	2.54331e+06	Agrobacterium radiobacter K84	_ phosphate regulon transcriptional regulatory protein PhoB _	12	NLEAEGFEVDTILRGDEAELRLQERIPDLLILDWMLPGVSGIELCRRLRMRPETERLPIIMLTARGEESERVRGLSTGADDYVVKPFSTPELMARVK
222080821	2.54086e+06	Agrobacterium radiobacter K84	_ phosphate regulon transcriptional regulatory protein PhoB _	12	IVEDDEAFCESLNQAFTNEGYTVDAWRDGRLAQVSLTARLPDLLVLNWTMTSTFGIDLLKGMRSAPRSAAIPVIMLATDATENDKLLALSLGADDYLVKPFSMLEIVLRV
222084842	2.54337e+06	Agrobacterium radiobacter K84	_ chemotaxis two-component response regulator protein _	131	VLTVDDSRTIRNMLLVTLNNAGFETIQAEDGIEGLEVLEEANPDVIVTDINMPRLDGFGFIEGVRRNDKYRAIPILVLTTESDAEKKNRARQAGATGWIVKPFDPAKLIDAIE
222087598	2.54614e+06	Agrobacterium radiobacter K84	_ two-component response regulator protein _	13	VLLVEDDNILGSSLKKALEKHAYGVDWMRDGESGLEAAQHSDFAAIVLDINLPRLSGMEVLRGIRQRGNSVPVLLLTALDAVRQKVEGLDEGADDYLVKPFDLDELLARM
222087224	2.54576e+06	Agrobacterium radiobacter K84	_ two-component response regulator protein _	13	ILLVEDDETIGSAVRDHIAATTHAVDWVKNLADATEVTSAVKYGLILLDLQLPDGVGIDFLKKLRRKPDETPVIILTARDQISDRIEGLNSGADDYLVKPFNLGELSARI
222086746	2.54528e+06	Agrobacterium radiobacter K84	_ two-component response regulator protein _	13	VLLVEDNAIIGNAVQDHLLAEGFAVDWSMDLGAAKMAVAGGHYDLVLLDLRLPDGSGLDLLKSMEAQVGTTPVIILSAYDQISDQMTGLSIGAVDYLVKPFGLAELTARI
222081273	2.54064e+06	Agrobacterium radiobacter K84	_ two-component response regulator protein _	147	VLVVDDDPRIRQMLTRYFEDEGYAVSTASNGLEMRACLQQENFDAILLDWVLPGGKDGLDLAREIRAQSDVPIIMLTGRDDVVDRIVGIEVGADDYIAKPFHLREVHARL
222086326	2.54486e+06	Agrobacterium radiobacter K84	_ two-component response regulator protein _	157	VLIVDDSATARALLSSRLKRYNFRVSVAENGAKALEILKANRDIGLMVTDYNMPDIDGFELTRRIRASIGSHELRIIGVSSSTNRLLSARFLKAGGNDFMLRPFIDEEFYCR
222086325	YP	Agrobacterium radiobacter K84	_002544858.1_ two-component response regulator protein _	157	VMVVDDMPSARRVLVEILEAQQFKVVEAGSGVEALSVLEEYSDIEMVLTDYHMPDMNGQELTRRIRHRFGSDRMRVVGVSSSNDRLLSAAFLKAGANDFIYRPFVEEELQCR
222081275	2.54064e+06	Agrobacterium radiobacter K84	_ two-component sensor histidine kinase protein _	17	ILVVEDDARVRRVAVSRLLDAGYSVIEATNGAEALAAFQENPDIALLFTDVVMPGGMAGDELAHKVRALRPEIKVLFTSGYAEPTIAGRELAEAGSWLKKPYTAREL
222084471	2.543e+06	Agrobacterium radiobacter K84	_ pilus assembly protein _	180	QVMDRCANDRRMSKVNLRITGGSTAAAANMFASAPTPNLIILETRANPQNLLAELAPLAAVCDPTTKVVIVGHHNDISLYRELIRNGISEYIVQPVTMTDIMAA
222081938	2.5413e+06	Agrobacterium radiobacter K84	_ two-component response regulator protein _	194	VLIIEDDPLHRSYLNEAVRAALPECETVLEAENGNAGERLARDFRSAHVVMDLQMSPRNGIEAARTIWKERPETRILFWSNYSDEAYVRGVSRIVPQGAVYGYVLKSASDDRLRLAL
222082735	2.5421e+06	Agrobacterium radiobacter K84	_ two-component response regulator protein _probably regulates osmosensitive potassium channel_ _	19	ILVVDDEPPIRKLLRVGLSAQGYLVNEAPNAAAAKLSVEEDRPDLIILDLGLPDKPGHDLLQEWREDGLEIPVVILSSRTDEAGIVKALETGADDYVTKPFGVNELAARI
222085608	YP	Agrobacterium radiobacter K84	_002544138.1_ two-component response regulator protein _	203	ILLVDGRANSQERIVRALKPIAQVTATSDPQAALFEVAEKPFELVIVNSNFEDYDPLRLCSQLRSLERTRFLPVLLVTEQGADEMIVRALDLGVNDYIVRPLDPNELVAR
222085311	2.54384e+06	Agrobacterium radiobacter K84	_ two-component response regulator protein _	20	ILIVEDDINLNRQLADALKEAGYVVDTAFDGEEGHFLGDTEPYDAIILDIGLPEMDGITVLEKWRGAGRGTPVLILTARDRWSDKVAGIDAGADDYVAKPFHVEEVLARI
222082681	2.54205e+06	Agrobacterium radiobacter K84	_ two-component response regulator protein _	20	MIAEDEPTIVSDMRRCLEDQHYIVSTVTDGEEAWYRGDVEHFDLVILDLGLPKLDGLTVLRRWRAGRRGMPVIILTARDGWRDKVDGMDAGADDYLTKPFRMEELLARVR
222082948	2.54231e+06	Agrobacterium radiobacter K84	_ two-component sensor histidine kinase/response regulator hybrid protein _	24	IAVIDDERDALDAISLLLETLGYRVYAGRSAAEACLAHAEASPDGTAPIDLVITDYRLEAGTTGIEAIEEVRTHAGRRLPAIILTGDTSPARLRQVTESGHLLLHKPVDAEQMQQAI
222086817	2.54535e+06	Agrobacterium radiobacter K84	_ two-component sensor histidine kinase protein _	250	IVVVDDNEDHRELMREVLSPLDFIVLTATGGPDCLTLIEGIKPDLFLVDISMPGMNGWQLVSRLRESGQTAPILMLSANIGDSAAAKDSDDSHNDAIAKPIDIRQLRDKL
222082354	2.54172e+06	Agrobacterium radiobacter K84	_ two-component response regulator protein regulating C4-dicarboxylate transport system _	25	VMLVDDDDAFRVALADSFAIAGLDIETYSDGHSALASLNADFPGVLVTDIRMPRVDGHGVLDAALARDPELPVILMTGHGDIAMAVAALKQGAFDFIAKPFATDHMIASV
222082591	2.54196e+06	Agrobacterium radiobacter K84	_ two-component response regulator protein _	27	VLVVDDHKEIRDLLAKYLAKNGLRVSTANGGAEMRQQLRTATIDLVVLDIMMPGEDGLSLCRSLRQTSMVPIVLLTAVSDETDRIIGLELGADDYVTKPFNPRELLARI
222081138	2.5405e+06	Agrobacterium radiobacter K84	_ two-component response regulator protein _	27	IAVVDDHADIRNLVGQYLEQQGYRVSVADSGVALRRILERSAVDLVVLDVMMPGEDGLSVCRHLRATMDVPIIFLTAMTEDTDRIIGLELGADDYLVKPFNPRELLARI
222084364	2.54289e+06	Agrobacterium radiobacter K84	_ two-component response regulator protein _	27	LLLVEDDREIRALLEEFLTREDYTVEAVDSAAAMDRALARGFPDLIILDLMLPGEDGLSACRRIRTRSRVPILMLTAKSEDIDRILGLEMGADDYLGKPFNPRELLARI
222082916	2.54228e+06	Agrobacterium radiobacter K84	_ two-component response regulator protein _	27	ILIVEDDTDIAHMLVELVKSNGFEATSAASGGEMDRLLARHKFDLIVLDGMLPGEDGFSICRRLRSSRSIPILMLTALREDVDRILGLELGADDYVTKPFNSRELMARIK
222082720	2.54209e+06	Agrobacterium radiobacter K84	_ two-component response regulator protein _	2	IVIADDHDLARSGIAAVLATSENLDIVGQAKNGLEAVELCDRLRPDLILLDIRMTPLDGLGAAAEIRKIAPDTKIVMLTMHESIDYLSAAIKVGASGYLLKDVSRESLLRTI
222082450	2.54182e+06	Agrobacterium radiobacter K84	_ two-component response regulator protein _	2	AVIDDHPLFREGVVRSLVEIGGFSIVGEGSTKDDAVRIVAESRPDVLLMDISMPGGGLEAIPLILEHVPDQKIVMLTVSEASDDVTTALRSGAKGYVLKGVGSRTLAEI
222085607	2.54414e+06	Agrobacterium radiobacter K84	_ two-component response regulator protein _	31	VMIVEDNELNMKLFRDLIEASGYTTIQTRNGMEALDLARKHRPDLILMDIQLPEVSGLEVTKWLKEDDDLHVIPVIAVTAFAMKGDEERIRQGGCEAYVSKPISVPKFIETI
222082719	2.54208e+06	Agrobacterium radiobacter K84	_ two-component sensor histidine kinase/response regulator hybrid protein _	31	VLCVEDNPASLNLIENVLSRYCSAKVIPAMLGGVGLTLAREHQPNLILLDINLPDISGLEVLKSLRADGDTHAVPVIVISADATEATRQRALQEGATRFLAKPLDIRQFLQTL
222084257	2.54278e+06	Agrobacterium radiobacter K84	_ two-component response regulator protein _	32	LLIVDDDGPFLRRLARAMETRGFTVETAESVAEGVAKSKVTPPKYAVVDLRLGDGTGLEVIEAIRQRRDDTHIVVLTGYGNIATAVTAVKLGALDYLAKPADADDVYAAL
222086167	2.5447e+06	Agrobacterium radiobacter K84	_ two-component sensor histidine kinase/response regulator hybrid protein _	36	VLLVEDEEAVRRGGKRMLETRGYTVYEAGSGVEALEIMEELDGQVDVVVSDVVMPEMDGPTLLGELRKKYPDMKFIFVSGYAEDAFARNLPADARFGFLPKPFSLKQLAVV
222086713	2.54525e+06	Agrobacterium radiobacter K84	_ two-component sensor histidine kinase/response regulator hybrid protein _	397	ILVIDDNEINRRILEEQLQQWGFDGYAAEDGKTGLAILHAASEMGAPVDAVILDYHMPDMNGDEVARTIRADARFEALSLIFLTSMDVVGSDKEFAALNGQAHLMKPVRANVLRGT
222080841	2.5402e+06	Agrobacterium radiobacter K84	_ two-component response regulator protein _	39	ILLVEDNKALSEGLFAILRGTGYAVDAVGDGASANAAAAAETFDLVILDLNLPEMDGLDVLRAMRARQNKAAVLILTARGTQEEKVRGLDLGADDYMIKPFDISEFEARV
222087616	2.54615e+06	Agrobacterium radiobacter K84	_ two-component response regulator protein _	39	LLIVEDNRELASWLGKALRQAQYAVDIAHDGEDGEHMLKVASYAVVILDLSLPKIDGLTLLKRLRQGGNKVPVIILTANASLDGRITGLDSGADDYLAKPFEIAELEARI
222082949	2.54231e+06	Agrobacterium radiobacter K84	_ two-component response regulator protein _	3	IIADDHAIVREGLKLLISAMTNVSIVAEAANGDTLLDLVRSTRADLLILDLGMPGVAGIQFISDIRALAPRMKILVLTANIEPRTVRAALDAGANGYLTKDGDPEELDTAI
222085009	2.54354e+06	Agrobacterium radiobacter K84	_ two-component response regulator protein _	3	VLLIDNHPVVLDGLKAVLETFDHIEVVGTASLAQIGLEIARQRRPQVTLMDINMPKLSGIDAIELFRRELPDTRIVMLSMHDSREYISSSIMHGAVGYILKDVSTDEVVCAI
222085392	2.54392e+06	Agrobacterium radiobacter K84	_ two-component response regulator protein _	40	LILEDNLIIAMEAEEILRLVGVAEVEIASNLEQAVNAIHTDHYDFAMLDVNLGESMSFGFARLLVERGIAFGFVSGYSDTLDFPADLRHVPLLNKPFDEA
222086325	2.54486e+06	Agrobacterium radiobacter K84	_ two-component response regulator protein _	412	ELGLNVTHCSSLKQLNEVLAIDGHGFTMAVVDLNLPDSPHGEGLDVAIAHHIPSIVFTASFDVAMRSRIMERRIVDYVLKDN
222085608	2.54414e+06	Agrobacterium radiobacter K84	_ two-component response regulator protein _	50	ILVVDDIPANVKLLEARLLAEYFEVLTAEDGLKALAICDSTQVDLVLLDIMMPGMDGFDVCERLKSDARTSHIPVVMVTALDQPADRVRGLKAGADDFLTKPVNDLQLISRVK
222082058	2.54142e+06	Agrobacterium radiobacter K84	_ two-component sensor histidine kinase/response regulator hybrid protein _	52	VLVVDDNEGSREILQGFCEAWSIIPELAASAQEGLAAISSAIAEHRPFDLVLLDWKMPGMNGLEAIKVLQSILPSEDWPRIIMISAYGREQAVGEAETLGIDGFLSKPVSASSLFDML
222087102	2.54564e+06	Agrobacterium radiobacter K84	_ two-component response regulator protein _	57	ILLAEDDNDMRRFLVKALEKAGYKVLSFDNGASAYDRLREEPFSLLLTDIVMPEMDGIELARRATELDPDLKVMFITGFAAVALNPDSKAPKDAKVLSKPFHLRELVDEVN
222087351	2.54589e+06	Agrobacterium radiobacter K84	_ two-component response regulator protein _	57	ILITEDEDSLRTFVARALRLDGHETEEAADGAEGLEKLKQGVYDLLLSDIRMPVMDGIELAHQAASTCPGMKILLMTGYAEQRERADDLMEKIVDVVSKPFALPDIRKAV
222086833	2.54537e+06	Agrobacterium radiobacter K84	_ two-component response regulator protein controls chromosomal replication initiation _	58	VLLIEDDSATAQSIELMLKSESFNVYTTDLGEEGVDLGKLYDYDIILLDLNLPDMSGYEVLRTLRLSKVKTPILILSGMAGIEDKVRGLGFGADDYMTKPFHKDELVARI
222086787	2.54532e+06	Agrobacterium radiobacter K84	_ two-component response regulator protein _	60	IMIIEDEPLIAMDIEQMVESLGHRVTGIARTHAEAVALHNATKPSMVLADIQLADGSSGIDAVNEILKTSNIPVIFITAFPERLLTGERPEPTFLVTKPFNPDMVK
222085891	2.54442e+06	Agrobacterium radiobacter K84	_ nitrogen regulation protein _	68	ILVADDDAAIRTVLNQALSRAGYDVRITSNAATLWRWVSAGEGDLVVTDVVMPDENAFDLLPRIKKARPELPVLVMSAQNTFMTAIKASEKGAYDYLPKPFDLTELIAII
222084846	2.54338e+06	Agrobacterium radiobacter K84	_ protein-glutamate methylesterase protein _	6	VLVVDDSPTMRGLITAVLRSDPEVDVIGQAGDALEARAAIKALNPDVVTLDIEMPNMNGLDFLEKIMTLRPMPVIMVSTMTHRGAEATLAALEIGAFDCVGKPVP
222084237	2.54276e+06	Agrobacterium radiobacter K84	_ two-component response regulator protein _	73	IALVDDDRNILTSVSIALEAEGYKVETYTDGASALDGLLARPPQLAIFDIKMPRMDGMELLRRLRQKSDIPVIFLTSKDEEIDELFGLKMGADDFITKPFSQRLLVERVK
222082148	2.54151e+06	Agrobacterium radiobacter K84	_ two-component response regulator protein _	75	ILVIDENTIRASIIEEGLREAGHARVTVIHEVHGVARTIETLKPDVIIIDIENPNRDMMEHLFQLTRTVGRPIAMFVDRSDTASIEAAVDAGVSAYIVDGLKKER
222087576	2.54611e+06	Agrobacterium radiobacter K84	_ two-component response regulator protein _	79	VLLIDDDVELTTLLQEYLAEEGYDVSTDTDGRAAIAAAAGNTVDIIVLDIMMPRMNGIEVLQRIRKLSPVPVLMLTARGDDIDRISGLNLGADDYVPKPCSPGELAARL
222084847	2.54338e+06	Agrobacterium radiobacter K84	_ chemotaxis two-component response regulator protein _	7	VLIVDDQVTSRLLLSDALTQLGFKQITAAGDGEQGMKIMQQQPHHLVISDFNMPKMDGLGLLQAVRTNPATKKAAFIILTAQGDRALVQKAAQLGANNVLAKPFTIEKMKAAI
222087550	2.54609e+06	Agrobacterium radiobacter K84	_ two-component response regulator protein _	81	ILLVDDDNDLREMLVEQLSLYEEFTVLQEVNAGKGVQTARAAPVDLLIMDVGLPDMDGREAVKLLRKNGFKSPIIMLTGHDTDSDTILGLEAGANDYVTKPFRFAVLLARI
222085893	2.54442e+06	Agrobacterium radiobacter K84	_ nitrogen regulation _two-component response regulator_ protein _	83	ILVVDDEEDIREIVSGILSDEGHETRTAHDSDSALAAISDRAPRLIFLDIWMQGSKLDGLALLDEIKARHPDLPVVMISGHGNVETAVSAIKRGAFDFIEKPFKADRLI
222081550	2.54091e+06	Agrobacterium radiobacter K84	_ two-component response regulator protein _	89	ILIVDDEPGIRNFLVKILLPRCKLIEVAADTKEASRKLDEQNFDVVILDNIMPGQNGLDWLAEQRTIGFFADVILMTAYADLDTAIGALRAGVVDFILKPFRSNQLLNAV
222086818	2.54535e+06	Agrobacterium radiobacter K84	_ two-component response regulator protein _	8	VLLVDDSPEALGFLTDALEQSGFSVLIATSGSAALNIVERITPDLILLDAVMPSMDGFETCRRLKANVGVAQIPVIFMTGLTETEHVVHALESGGVDYLSKPINVDELRARI
222081089	2.54045e+06	Agrobacterium radiobacter K84	_ two-component response regulator protein _	94	VLVVEDEPLMRMDISDALEDGGFLVLEAANADEAIVILVEHTEIQALFTDIDMPGSMDGLMLAIAVRDRWPPIKIIVTSGHQSIREENLPVDGRFFSKPYDPEKIVSTI
222081806	2.54117e+06	Agrobacterium radiobacter K84	_ two-component nodulation response regulator protein _	9	IYVIDDDPSVRDGLDSLLRSVGYDVSSFASPRDFLKHRRSDGPSCLVLDVRMPDASGLDFQDELARTGNPLPIIFLTGHGDVPMSVRAMKAGAVEFLLKPFREQDLLDAIR
222080968	2.54033e+06	Agrobacterium radiobacter K84	_ two-component response regulator protein _	9	IAIVDDDRSVRDATENLVRSYGLNARTFASAESYLAAARDCSVDCLITDVQMDGIGGMELFQILREFGITTPVIFITAFPDEHISKRVIAAGAVAFLGKPFESQTLIDCI
222080969	2.54033e+06	Agrobacterium radiobacter K84	_ two-component response regulator protein _	9	VFVIDDDASLRDALSSLFRSVGIQVELYGSPSEFLAREPVTVGESCLVLDIRLPGVSGLDFQNQLSKLGNTIPIIFMTGHGDVPMSVRAMKAGALDFLIKPFRDQDMLDAV
15888044	353725	Agrobacterium tumefaciens str. C58	_ two component sensor kinase _	0	ILLVEDNRVNQIVFSQILEGLGLSWRLATSGEEALRLFVEQSPSVVLLDTTLGDIDGFEVAQRMRDLAGDKHIPIVGVITHAFEGDLDKCLASGMDDMLLKPVSPDMV
159185161	NP	Agrobacterium tumefaciens str. C58	_355290.2_ two component sensor kinase/response regulator hybrid _	0	VLVAEDNDVNQIVFSQILQQAGLRFLIVGNGKRAVQAWEEYNPALILMDVSMPVMNGHQATQAIRAAEQAAGDSRHVPVIGVTAHTQEADRERCLEAGMDDYLSKPISPESLEDKI
15888321	354002	Agrobacterium tumefaciens str. C58	_ two component response regulator _	10	ILVIEDDLEAAAYMTKAFREAGIVADHASDGESGLFMGCENAYDVLVIDRMLPRRDGLSVISELRRRGIETPVLILSALGQVDDRVTGLRAGGDDYLPKPYAFSELLARI
15887970	353651	Agrobacterium tumefaciens str. C58	_ two component response regulator _	10	ILLVEDDNTTGNYVTKGLASAGHIVDWVKDGREALAAGLDGGYDVAIVDRMIPGLDGLNLVKSLRAASIRIPILFLTAMSGVDDRVEGLEAGGDDYLVKPFAFSELTARIN
159185258	355482	Agrobacterium tumefaciens str. C58	_ two component response regulator _	10	ALLEALRRRDVLADHVSTISDADALARDGSYDVLVLDRRLPDGEGLNLVASLRRSKNSVPILVLTALGNVDHRVDGLDAGADDYLAKPFAIEELLARL
15890352	356024	Agrobacterium tumefaciens str. C58	_ two component response regulator _	110	LLLIEDEKEMADALSATLGKQGIVIDHTMRLGDAMELTRQHLYDAILLDRRLPDGEGLAFIPKLRRAGVDTPIILLTAMNEPEDRIAGLDGGADDYLGKPFLVGELLARV
16119399	396105	Agrobacterium tumefaciens str. C58	_ two component response regulator _	110	LLLIEDDPEMTDALKVALSQHGIVLDAVGDLATAREAIIMADYDIVLIDRQLPDGDGSTFLADLRRAGSNTRSIIISALRSTDERISGLNDGADDYLPKPFEIPELVAR
159185897	356842	Agrobacterium tumefaciens str. C58	_ two component response regulator _	110	LLLVEDEREMAAALSAALHRFDIIVDTVGTLDLARHAIMDSVHDLVVLDRQLPDGDGIQLIEDLRLLPVTPPVIVLTAQGGLADRINGLNLGADDYLAKPFAVEELLARI
159185100	355164	Agrobacterium tumefaciens str. C58	_ two component response regulator _	11	LLIVDDDARIRNLLQRFLGDKGYRVSVAGDAAEARRKMVGIRFDLLILDVMMPGENGLSLTRSLNENKSVPVILLTARSEADSRIAGLEAGADDYLAKPFDPRELVLRI
16119794	396499	Agrobacterium tumefaciens str. C58	_ two component response regulator _	11	VLVIDDDVAMRHLIVEYLTIHAFKVTAVADSKQFNRVLCSETVDVVVVDLNLGREDGLEIVRSLATKSDVPIIIISGARLEEADKVIALELGATDFIAKPFGTREFLARI
15887773	353454	Agrobacterium tumefaciens str. C58	_ two component response regulator _	12	IAVVEDEEALSVLLRYNLEAEGYDVDTIPRGDEAEIRLQERIPDLLILDWMLPGVSGIELCRRLRMRPETERLPIIMLTARGEESERVRGLATGADDYVVKPFSTPELMARVK
16119346	396052	Agrobacterium tumefaciens str. C58	_ two component response regulator _	12	GDKVAQPDIVGLILDVDRDHHGAAIICQRIKSCDKTEKLPVLAIIPNGDTEAYMELMRAGADQCLIRPFWPPHL
15887864	353545	Agrobacterium tumefaciens str. C58	_ chemotaxis receiver protein _	131	VLTVDDSRTIRNMLLVTLNNAGFETIQAEDGIEGLEVLEQSNPDVIVTDINMPRLDGFGFIEGVRRNEKYRAIPILVLTTESDAEKKNRARQAGATGWIVKPFDPAKLIDAIE
15890951	356623	Agrobacterium tumefaciens str. C58	_ two component response regulator _	13	VLLVEDDYVLGEALRDHVAAAGHAVDWFKTLGDAMAATLTMGYGLILLDMRLPDGEGITLLQSLRKRDDATPVIILTAHDQVSDRIAGLNAGADDYVVKPFDLNELSAR
15889277	354958	Agrobacterium tumefaciens str. C58	_ two component response regulator _	14	VMIEDDEGHARLIEKNVRRAGVNNEIVPFTLGAKALDFILGESRDGLVSKDRYLLVLLDLNLPDMSGLNILEQIKSNEYTRRLPVVVLTTTDDETEIQKCYDLGANVYITKPVDYEGFANAI
159185004	354962	Agrobacterium tumefaciens str. C58	_ two component response regulator _	14	ILLVEDNPRDLELTLTALEKCQLANEVVVARDGTEALDYLNVTGSHHNRPGGDPAVVLLDLKLPKVDGLEVLQTVKGSDHLRHIPVVMLTSSREEQDLVKSYELGVNAFVVKPVEFNQFFKAI
159184597	NP	Agrobacterium tumefaciens str. C58	_354083.2_ two component response regulator _	157	VLVVDDARTARSGLVEILERQNFKVSEAHSGNRALEILSQDPSIQLVITDYHMPDMDGYELTRRIRDSRSSEDLRVIGISSSTDRLLSASFLKAGASDFVYRPFVPEELQCRI
159184846	354624	Agrobacterium tumefaciens str. C58	_ two component response regulator _	157	VLIVDDSPTARALLSSRLKRYNFRVSLADSGAKALEILRANPDIGLVVTDYNMPDIDGFELTRRIRTVRGSHELRIIGVSSSTNRLLSARFLKAGGNDFMLRPFIDEEFYCR
15890924	356596	Agrobacterium tumefaciens str. C58	_ two component sensor kinase/response regulator hybrid _	16	ILVVEDDEEVRNTVVETLGDLGYRVLTARDAQAGLTVVESGIPIDVIFTDVVMPGSLKSREMARRAQERLPNLAVLFTSGYTENSIVHGGKLDAGVELLSKPYTREALARRL
15890924	NP	Agrobacterium tumefaciens str. C58	_356596.1_ two component sensor kinase/response regulator hybrid _	16	VLLVEDDELIRMNSTEMLSDSGFAVVEAGNAAQALEVIEADPIDVLVTDLGLPDMKGGELAAEALRRKPGLAIVFATGDSHLPEGAPESAVLLTKPYDEQQIVAAV
159186002	356606	Agrobacterium tumefaciens str. C58	_ two component response regulator _	194	VLIVEDDALHRAYLNEAVRAALPECDKVLEAANGRTGEKLARENRAAHIVMDLQMNERNGIEAARTIWKERPDTRILFWSNYSDEAYVRGVSRIVPEGAAYGYVLKSASDDRLRLAL
15890210	355882	Agrobacterium tumefaciens str. C58	_ two component response regulator _	1	ILIVEDDPDMAELIADLVEAEGWSPLVVHSAEDAAATLGHEQIDLVLLDHNLPGISGRTFAQRIRTELGLNVGIVMVTAAGSATERVLGLETAADDYVVKPFEPIELTARIK
15888624	NP	Agrobacterium tumefaciens str. C58	_354305.1_ response regulator PleD _	203	VLVADGRASSQERIIRALKPVAEVDAVTEPQAALLKAASSPFELVIVNSNFEDYDPLRLCSQFRSLERTRFLPLLLVAEQGADEMVARALDLGVNDYILRPIDPNELVAR
16119733	396439	Agrobacterium tumefaciens str. C58	_ two component response regulator _	20	VLVAEDDKRIAQSLSVALAAAGFVTELSANGEDAWFRGETEAFDAVILDLGLPGLDGLTILKRWRRDGRATPVLILTARGDWSERVEGIESGADDYVVKPFRMEEVVARVR
159186289	355953	Agrobacterium tumefaciens str. C58	_ two component response regulator _	20	VLLVEDDGDLSKRIAANLRAENFVVDIAQNGEDAEHAGLTELYDVAILDLGLPRIDGVSVLKSWRAAQRNLPVLVLTARDGWPDKVASFKAGADDFLTKPFKVEELVLRL
159184556	353994	Agrobacterium tumefaciens str. C58	_ two component response regulator _	20	ILVVEDDANLNRQLTDALKEAGYVVDQAFDGEEGHYLGDTEPYDAIVLDIGLPQLDGITVVEKWRAAGKAMPVLILTARDRWSDKVAGIDAGADDYVTKPFHVEEVLARV
159184332	353512	Agrobacterium tumefaciens str. C58	_ two component response regulator _	21	IIIADDHPLFRGALKQAVAGLDGQQTIIEAGDFEAARHAATTRNDADLMLLDLAMPGVSGFSGLMALRAEFSSLPIVIVSATDDATTVRRSIELGASGFISKSSGIDDIRDGI
15887876	353557	Agrobacterium tumefaciens str. C58	_ two component sensor kinase/response regulator hybrid _	24	VLCIDNEPKILEGMTLLLTGWGCDVLPAGSVAALEEPFLTLAAAPDVIIADYHLDDGDGISAIRLIRTFYGKTIPALLVTADRSPEVRSDAEKYGISVQHKPVKPAALRAYI
15890187	355859	Agrobacterium tumefaciens str. C58	_ two component sensor kinase/response regulator hybrid _	24	VLIIEDENGMRDLLKMGLEQSGYVVAATSTGAEALAIVRGLQFKPDVILADYNFPTGGNGIAAIEDIRQALRRNVPALILTGDISSKALTTFAQHEIPYLHKPVKLKDVVQVV
15889688	355369	Agrobacterium tumefaciens str. C58	_ two component sensor kinase _	250	IVVVDDNEDHRELMRQVLSPLDFVVLTAQSGPECLTLIEGVKPDLFLIDISMPGMTGWQLVTKLREAGQTAPLIMLSANIGDGAVAGAGDDNHNDAIAKPVDIRHLCDRL
159184165	353150	Agrobacterium tumefaciens str. C58	_ two component response regulator _	25	VLLIDDEEELRFSTAQALELSGFAVTMLASAEHALELIGYSFDGVVVSDIRMPGMDGMTLLQKVRELDPEIPVILMTGHGDVQLAVNAMRNGAYDFIEKPFTPQYLA
15891637	357309	Agrobacterium tumefaciens str. C58	_ two component response regulator for C4-dicarboxylate transport _	25	IFLVDDDSQLRKAMVQTLELDGLPVTSFSRAEQALAALNEDFDGIIITDVRMPGMTGLEFFDHVRKIDADLPVILITGHGDVPMAVDALHNGAYDFIAKPFPAERMVES
159184699	354304	Agrobacterium tumefaciens str. C58	_ two component response regulator _	31	VMIVEDNELNMKLFRDLIEASGYTTIQTRNGMEALDLARKHRPDLILMDIQLPEVSGLEVTKWLKEDDELHVIPVIAVTAFAMKGDEERIRQGGCEAYVSKPISVPKFIEII
15887408	353089	Agrobacterium tumefaciens str. C58	_ two component response regulator _	32	LLIVDDDGPFLRRLARAMETRGFAVDTAETVSEGIARSKAAPPKYAVVDLRLADGNGLEVIEAIRQNRDDTQIVVLTGYGNIATAVTAVKLGALDYLAKPADADDVFNAL
159186602	396310	Agrobacterium tumefaciens str. C58	_ two component response regulator _	33	ILIVEDEFLIALELESSLLDAGYKVVGIAVTATEAVAMARAEQPNLAVMDIRLADRTDGVEAAIELFGMFGIRSIFASAHADEETRKRAAPARPIGWVQKPYSADALIRVI
15888688	354369	Agrobacterium tumefaciens str. C58	_ two component sensor kinase _	36	VLLVEDEEAVRRGGKRMLETRGYTVHEAGSGIEALEVMEELEGKVDIVVSDVVMPEMDGPSLLRELRKSYPDLKFIFVSGYAEDAFARNLPADAKFGFLPKPFSLKQLAIAV
159185227	355418	Agrobacterium tumefaciens str. C58	_ two component response regulator _	39	ILLVEDNQVLSEGLSALLRGSGYAVDVVSDGASADAAIAAESFDLVILDLNLPEMDGIEVLRSMRSRQDKAAVLILTARGTPEEKVKGLDLGADDYMIKPFDITEFEARV
16119495	396201	Agrobacterium tumefaciens str. C58	_ two component response regulator _	3	VLLVDNHPLVLDGLKAVLETYEHIAVVGTAVSAMAGIDAAVATKPHVVLMDINMPQINGIDALELFKERQLSARVLMLSMHDSREYISTSVMYGAAGYILKDVATEEIVAAI
15889279	354960	Agrobacterium tumefaciens str. C58	_ two component response regulator _	40	ILVLEDDALLAMDMEDFLSDLGVNVVGPVSHIGAALEKINATDLDGAVIDLNLRGELSLPVIEELKAANIPFVICSGYAEIPGVRAKLDGLTVVSKPCDFDNLS
15889444	355125	Agrobacterium tumefaciens str. C58	_ bacteriophytochrome protein _	40	VLLVEDQMLIAMDVENMLEDNGIKAIETATSSAMAIEKLKTYLPDVAILDINLGSDTSIPVARELHRRGIPFLFATGYADGSMVPDEFGAVPVIRKPYDEDALMA
15888380	354061	Agrobacterium tumefaciens str. C58	_ two component response regulator _	40	VIVVEDEYLVALDVEAVLQSMGVESIIIATTLAQARQVVEQDGADCVLLDVSLSDGKSYDFARQLRMAGIPFGFVSGYGD
159185003	354961	Agrobacterium tumefaciens str. C58	_ two component sensor kinase _	48	LLLEDSSVDAELIEDQLSRLSPPPAVTRAVGKASFIEALEKQQFDIILADFSLPDFDGMSALDLVMRTRPDTPFIFVSGILGEDAAIDAFRRGATDYVLKQRLVRL
15888624	354305	Agrobacterium tumefaciens str. C58	_ response regulator PleD _	50	VLVVDDIPANVKLLEARLVAEYFDVVTAEDGFKALAICDEEQVDIILLDIMMPGMDGFEVCERLKANPNTAHIPVVMVTALDQPSDRVRGLKAGADDFLTKPVNDLQLIARVK
159185932	356752	Agrobacterium tumefaciens str. C58	_ chemotaxis response regulator _	57	ILLAEDDNDMRRFLVKALEKAGYKVSSFDNGASAYDRLREEPFSLLLTDIVMPEMDGIELARRATELDPDLKVMFITGFAAVALNADSKAPKDAKVLSKPFHLRDLVDEVN
15891337	357009	Agrobacterium tumefaciens str. C58	_ two component response regulator _	57	ILITEDEDALRAFVARALRLDGHETHEAADGEQGLEKLQQTSFDLLLSDIRMPVMDGIELAHRAAESFPAMRILLMTGYAEQRERADDLATKIVDVVSKPFALPDIRKAV
15889704	355385	Agrobacterium tumefaciens str. C58	_ two component response regulator _	58	VLLIEDDSATAQSIELMLKSESFNVYTTDLGEEGVDLGKLYDYDIILLDLNLPDMSGYEVLRTLRLSKVKTPILILSGMAGIEDKVRGLGFGADDYMTKPFHKDELVARI
159186049	356488	Agrobacterium tumefaciens str. C58	_ two-component response regulator _	60	IMIIEDEPLIAMDIEQMVTDLGHRVTGIARTHTEALDLFHRTQPKMILADIQLADGSSGLDAMKDILQMTTLPVIFITAFPERLLTGERPEPTFLVTKPFNPDMVK
159186269	355992	Agrobacterium tumefaciens str. C58	_ response regulator _	60	VLIVEDEFLIAMDIEDSIMQAEEEANVIGIANRLDQAVALGSRADIAFVDVNLADGQTGPEIGRRLSEDHGVVVIFMTANPEVVVNLGIGAGVIAKPVPQDAV
159185161	355290	Agrobacterium tumefaciens str. C58	_ two component sensor kinase/response regulator hybrid _	64	VLVIDDNDVNRRILTEQLRSWGIDGHAVENGPSGIAVLQEAASLGFAIDAIILDYHMPVMNGLDVVERIRADKRFDDIAIVFLTSMDVVGDETLFTDLSVQAHLMKPARARLLR
159186651	396444	Agrobacterium tumefaciens str. C58	_ two component sensor kinase/response regulator hybrid _	65	ILLVDDDALIAMSSADMLTDLGHEVVEAHSGKEALSLIDGGATFDLVITDYSMPGMTGAELAKAVRDRLPSLPIVLASGYVDFPS
15888771	354452	Agrobacterium tumefaciens str. C58	_ two component response regulator _	68	ILVADDDAAIRTVLNQALSRAGYDVRITSNAATLWRWVSAGEGDLVVTDVVMPDENAFDLLPRIKKARPDLPVLVMSAQNTFMTAIKASEKGAYDYLPKPFDLTELIAII
159184266	353375	Agrobacterium tumefaciens str. C58	_ two component sensor kinase/response regulator hybrid _	68	ILVAEDDAVNARIIRAVLEKSGYIVRAVDNFQALQQSVASGASRLPNLIVSDLNMPGGEGLDVLPDLLGKLKDERNIPVIILSGDAGAGTAEILLKAGAGAVLAKPADPRRLVEEI
15887867	353548	Agrobacterium tumefaciens str. C58	_ chemotaxis-specific methylesterase _	6	VLVVDDSPTMRGLISAVLKADPEVEVVGQAGNAMEARAAIKQLNPDVVTLDIEMPEMNGLEFLEKIMRLRPMPVIMVSSLTHRGADASLAALEIGAFDCVGKPAP
159184131	353073	Agrobacterium tumefaciens str. C58	_ two component response regulator _	73	IALVDDDRNILTSVSIALEAEGYRVETYTDGASALDGLIARPPQLAIFDIKMPRMDGMELLRRLRQKSDIPVIFLTSKDEEIDELFGLKMGADDFITKPFSQRLLVERVK
159185943	356727	Agrobacterium tumefaciens str. C58	_ two component response regulator _	75	ILVIDENAIRASIIEEGLREAGYQRVTVIHEVNGVARTIETLQPDVIFIDLENPNRDMMEHLFQLTRTVGRPIAMFVDRSDTASIEAAVEAGVSAYVVDGLKKER
15887868	353549	Agrobacterium tumefaciens str. C58	_ chemotaxis receiver protein _	7	VLIVDDQVTSRLLLSDALTQLGFKQITSAGDGEQGLKIMEQQPHHLVISDFNMPKMDGLGFLHAVRANPTTKKAAFIILTAQGDRALVQKAAQLGANNVLAKPFTIDKMRAAI
15890012	355693	Agrobacterium tumefaciens str. C58	_ two component response regulator _	81	ILLVDDDDDLRETLTEQLSPYEEFSLLSGANAAQAMQTAKTAQVDLLIMDVGLPDMDGREAVKLLRKGGFKAPIIMLTGHDTDSDTILGLEAGANDYVTKPFRFAVLLARI
15888773	354454	Agrobacterium tumefaciens str. C58	_ two component response regulator _	83	ILVVDDEADIREIVAGILSDEGHETRMAFDSDSALAAISERVPRLIFLDIWMQGSKLDGLALLDEIKSRHPEIPVVMISGHGNIETAVNAIKRGAFDFIEKPFKADRLI
159184597	354083	Agrobacterium tumefaciens str. C58	_ two component response regulator _	84	ILLIEDSVALSMLLRTRLSDETEAEVVHCASMAEADALMQANNFTLALTGLNLPDAPKGEILTLLSERKVPAIVFTATVDEEARKRYAEKKIIDYIVKDG
15889689	355370	Agrobacterium tumefaciens str. C58	_ LuxR family transcriptional regulator _	8	VLLVDDSPDALGFLTDALEQSGFSALIATSGQAALNIAERITPDIILLDAVMPVMDGFETCRRLKANAAVAQVPVIFMTGLTETEHVVRALESGGVDYLTKPINIDELRARI
15888455	354136	Agrobacterium tumefaciens str. C58	_ two component response regulator _	9	VYLVDDDDAVRKALILLLSTVGIKAKGFADPVVFLGQLPALEPGCLIFDIRMPAITGLKLQEKLAEEGVDWPVIVISGHGNIEACRRAFHNGAVDFLSKPVDEQDLIDAIQ
15890219	355891	Agrobacterium tumefaciens str. C58	_ two component response regulator _	9	VFIVDDDVSMREALTDLFRSMKFDAEAFDSAAAFLEKANLNRHGCLLLDVRLPGISGLDFQVQLERVGNRMPIIFMTGFGDIPMSVRAMKAGAVDFLTKPFKEQDILDAV
15890220	355892	Agrobacterium tumefaciens str. C58	_ two component response regulator _	9	IAVVDDDPAIREAMDDLIMSFGYECRLFASAEHFLESQQQAGIDCIVVDVKMPGLSGIELQSELNRRGSHPPMIFVTSYEDERTRNAALSGGALAFLRKPVNIGNLI
159186105	356354	Agrobacterium tumefaciens str. C58	_ two component response regulator _	9	VLVVDDDEDVRHSLQELMESVGLAVACFSSSRELLNVGLPDRPGCLVLDVRMPGASGLDLQQQLSTRGVTKPIVFLTGYGDIPMTVQAMKAGAVDFLTKPVRDQTLLDAV
15890187	NP	Agrobacterium tumefaciens str. C58	_355859.1_ two component sensor kinase/response regulator hybrid _	9	VVDDEKDIRDHLRALFEGEGWTVATYVSAEEYIADYKPDRSGCLLVDAYLPGMVGMELLRLLKERQHRFPVIVITGHSDVRMAIDAMRYGAADFIEKPISYQELYRSV
222147677	2.54863e+06	Agrobacterium vitis S4	_ two component sensor kinase _	0	ILVVEDNEVNQIVFSQILEGLGRSYRLAVNGADALAIWQVERPAIVLMDISLPDINGMDLCRLMRQRQRAGDPRSAIIGVLVPAFDHDRGRCLDAGMDDVIVKPLSPDMIEQL
222149462	2.55042e+06	Agrobacterium vitis S4	_ two component sensor kinase/response regulator hybrid _	0	DAGEAERHFFHQALQALGVGHACVEGESEALALWRQWQPGMMLIDLVEDRARVLDMVRQIRAEESQQPQTALTVLIGLAGDLSTYDKAACHKAGLDDLVLKPVSPDRLQD
222083203	YP	Agrobacterium vitis S4	_002542606.1_ multi-sensor hybrid histidine kinase _	0	ILIVEDDVRNIYALTNILEPRGAVIEIARNGEEALQKLDRSLSSTDGRIDLVLMDVMMPVMDGLTATRHIRNNPNWKKLPVITLTAKAMPDDQKRCIEAGANDYMAKPLDVEKLLSLV
222147417	2.54837e+06	Agrobacterium vitis S4	_ two component sensor kinase/response regulator hybrid _	0	ILLVEDNRVNQQVASRFLSKLGQDVVVAGDGAQAVARTEREVFDMILMDMQMPVMDGIEATRHIIERGGASALTPIVAMTANASDDDRRRCRAAGMVGFESKPVTMNRLRDLI
222102367	2.54651e+06	Agrobacterium vitis S4	_ two component response regulator _	10	ILVIEDDQTTRKYLVKGLSSAGHSIDCIGDGREGLSAGLDTRYDILIVDRMIPGLDGLNLVKSLRAASVRTPVLFLTAMSGVDDRVEGLEAGGDDYLVKPFAFSELVARIN
222148026	2.54898e+06	Agrobacterium vitis S4	_ two component response regulator _	10	ILVIEDDLEAAAYMTKAFREAGIMADHASDGEAGLFMGCENTYDVMIIDRMLPRRDGLSVISELRKRSINTPVLILSALGQVDDRVTGLRAGGDDYLPKPYAFSELLARV
222147648	2.54861e+06	Agrobacterium vitis S4	_ two component response regulator _	10	VILIEDDEDTAQDICAELKDYGYAVDWESDGARGLERARNGGADILIVDRMLPGMDGLAVIDTLRREQVRTPVLVISALSAVNDRVRGLRAGGDDYLTKPFAILELVARV
222149589	2.55055e+06	Agrobacterium vitis S4	_ two component response regulator _	114	IIADSSDIVRKVGRKILSELGFGVTEASTAREAMLACEAQLPHVIIVDSGLEGALGLITNIRAMPEGKTVRIFYCVIEADLKHMMQGKRAGASDFLLKPFDRKTLTE
222106298	2.54709e+06	Agrobacterium vitis S4	_ two component response regulator _	11	ILIVEDDEQIAGMVRDSLNEQGMLVEVAADGAAMDAKMRALEFDLVVLDVMLPGEDGFSICRRLRGSGDIPILMLTSVSSDIDRVVGLEIGADDYVTKPFVLRELTARIK
222149319	2.55028e+06	Agrobacterium vitis S4	_ two component response regulator _	11	LLVVDDDTRIRDLLHRYLTEQGFRVTVAAEAQEARRKLAGLAYDLLIVDVMMPGENGLSLTKSLSGEINAPIILLTARTEADSRIAGLEAGADDYLAKPFDPRELVLRI
222080238	2.5401e+06	Agrobacterium vitis S4	_ two component response regulator _	11	VLVIDDDAAMRHLITEYLTIHALRVTAVSDSQQFNRVLASETVDVVVVDLNLGREDGLEIVRGLATKSDIPIIIISGDRLEEADKVVALELGATDFIAKPFGTREFLARI
222147387	2.54834e+06	Agrobacterium vitis S4	_ phosphate regulon transcriptional regulatory protein PhoB _	12	IAVVEDEEALSVLLRYNLESEGYEVETILRGDEAELRLQERVPDLLILDWMLPGVSGIELCRRLRMRPDTERLPIIMLTARGEESERVRGLATGADDYVVKPFSTPELMARVK
222150004	2.55096e+06	Agrobacterium vitis S4	_ chemotaxis receiver protein _	131	VLTVDDSRTIRNMLLVTLNNAGFETIQAEDGVEGLEVLEECNPDVIVTDINMPRLDGFGFIEGVRRNEKYRAVPILVLTTESDAEKKNRARQAGATGWIVKPFDPTKLIDAIE
222106554	2.54735e+06	Agrobacterium vitis S4	_ two component response regulator _	13	ILVVEDDVILGSSLKKAFEKHAYGVDLMRDGESGLLAIQDNDYAVVILDVNLPKASGFEVVRTLRASGNKVPVLLLTALDSIRSRVEGLDEGADDYLVKPFDLDELLARVR
222107155	2.54795e+06	Agrobacterium vitis S4	_ two component response regulator _	13	VLLVEDDAVLGQAIRDHVGAAGHAVDWMKGLQDAEACTRTVAYGLILLDLRLPDGNGIDFLKRLREHGDVTPIIILTAHDQISDRIEGLNSGADDYLVKPFNLDELTARI
222147310	2.54827e+06	Agrobacterium vitis S4	_ two component response regulator _	14	IVMVEDDEGHARLIEKNVRRAGVNNEIVPFTNGTDALDYILGTDRSGETSADRYLLILLDLNLPDMSGTDILEQVKTNQHTRRLPVVILTTTDDQREIQRCYDLGANVYITKPVDYDNFANAI
222149013	YP	Agrobacterium vitis S4	_002549970.1_ two component response regulator _	157	VLIVDDSPTARALLSSRLKRYNFRVSTADNGATALQLLKSNADIGLVVTDYNMPDIDGFELTRRIRAVRGSHELRIIGVSSSSDRLLSARFLKVGGNDFMLRPFIDEEFYCR
222106573	YP	Agrobacterium vitis S4	_002547364.1_ two component sensor kinase/response regulator hybrid _	16	VLLVEDDALIRMDTAEILQDAGFVVIDVGSAEQAMAALETLAIDVLVTDVNLPGMSGRDLAARTRQIRPAAGIVFATGDASCVRDEADARVLTKPYGADQLVSTV
222147900	2.54886e+06	Agrobacterium vitis S4	_ Two component sensor kinase/response regulator hybrid protein _	16	ILVVEDSPLIRMGAIDLVISAGYEALEAGDADEAIRILESRDDIDLVFTDVQMPGTMDGIKLSHYIRDRWPPVKLIVASGAAILEESMLPGGSRFFSKPYDELTITEA
222083160	2.54256e+06	Agrobacterium vitis S4	_ two component sensor kinase/response regulator hybrid _	16	VLIVEDEPIIRMTIADDLIDAGFDVCEAANASDALTVLSEPHDIRAIFTDIDMPGELNGIEFAHVVRSRWPPIEIIITSGHK
222106573	2.54736e+06	Agrobacterium vitis S4	_ two component sensor kinase/response regulator hybrid _	16	VLVVEDDEAVRETVVALLADLGYRVLKAVDASSALSVIESGIPIDILFTDVIMPGTLKSPELARKARERLPNIAVLFTSGYTENSIVHGGKLDAGVELLSKPYTKEALAR
222107002	2.54779e+06	Agrobacterium vitis S4	_ two component response regulator _	19	ILVVDDEPQILRFLRPALAAAGYEVIEADTGKQALALVATAVPDLLILDLGLPDMDGKEVIAQLRHWNPIPIIVLSARDREVEKIAALDLGADDYLEKPFGIGELTARI
222148304	YP	Agrobacterium vitis S4	_002549261.1_ response regulator PleD _	203	VLLVDSRASSQERIIKALKPVADVVAMSDAQAALFEAAESNFDLVIVNGTLEDYDPLRLCSQLRSLDRTRFIPILLIADQGEEYLIVRALDLGVNDYIVRPVDTNELLAR
222147169	2.54813e+06	Agrobacterium vitis S4	_ two component response regulator _	20	ILLAEDDANIGRHVAETLRGEGYEVTLVNKGPDVWEAGEDTGLGAIILDLGLPGLDGLSILRRWRKDRIQTPVLVLTARGSWMERVDGFDAGADDYLPKPFRTEELLARL
222106228	2.54702e+06	Agrobacterium vitis S4	_ two component response regulator _	20	VLLVEDDEDLSGRIATALRSENFVVDIARNGEDALHAGLTELFDIAVLDLGLPKIDGVTVLKGWRESERNLPVLVLTARDGWPDKVSSFKAGADDFLAKPFKIEELVLRL
222148018	2.54898e+06	Agrobacterium vitis S4	_ two component response regulator _	20	ILVVEDDVNLNRQLVEALQEAGYVVDQAMDGEEGHYLGDTEPYDAVILDIGLPTMDGITVLEKWRSAGRAMPVLILTARDRWSDKVSGIDAGADDYVTKPFHVEEVLARI
222106283	2.54707e+06	Agrobacterium vitis S4	_ two component response regulator _	21	IIIADDHPIFREGIFALVRQLLPHSKIASTDTLDAALEIARANPFPPSMFILDLFFEGNNIVSNLRALREEFRLASIVVVTMASDKALVDTVMNAGINGFINKAALPDEIKEIL
222147461	2.54842e+06	Agrobacterium vitis S4	_ two component response regulator _	21	IIIADDHPLFRGALRQAVSGMDGRQDIVEAGDFEAARLAADQHPDADVLLLDLAMPGVSGFSGLMALRAEFSSLPIIICSATDDCATIRRSLELGASGFISKSSGIDDIRSAI
222150190	2.55115e+06	Agrobacterium vitis S4	_ Metal dependent phosphohydrolase with a response regulator receiver protein _	23	VVIDDSRSTLLALRLELLEITGLEVETFADPEEAIRVCETRQFDLVLVDYNMPKRSGLEVITALRAMPTYELVPILMITSETETAVCLNALEAGATDFLRKSADPVELKAR
222150188	2.55115e+06	Agrobacterium vitis S4	_ chemotaxis receiver protein _	23	ILTVDDSASIRMTTKIALTNAGYKVTEAVDGLDGLNKAKSSQFDLIVTDLNMPNMNGLAMIEALRRSPAHTGIPIIFLTTESDADMKNRAKAAGATGWITKPFDAEQLVKI
222106284	2.54708e+06	Agrobacterium vitis S4	_ Signal transduction histidine kinase _	24	VLLVEDDEAVLLATASLLRKWGCTVQAETAIPSVLHHCDLLITDFDLGGRMTGTECIAKVRQLAGWKVPAVVMTGHAPSRVIEDIADSDIPILSKPVRPAELRSAI
222106213	2.547e+06	Agrobacterium vitis S4	_ two-component sensor _	24	ILLVEDDEAVLIATASLLRKWGCHVQAEATIPRHVGDFDLLITDFDLGGGVTGTECIQIVQDLIGRQMPAVVMSGHDEGRVREDLGSADIPILSKPVRPAELRSV
222147490	2.54845e+06	Agrobacterium vitis S4	_ two component sensor kinase/response regulator hybrid _	24	ILCIDNEPDILEGMRLLISGWGCAVMTAGSVTDLDTTFSDNPVAPDVIIADYHLGDGSGIGAILRLRALYGQPVPGLLITADRTADVRAEAERQGIAVQHKPVRPAALRAY
222149564	2.55052e+06	Agrobacterium vitis S4	_ two component sensor kinase _	250	IVVVDDNEDHRELMREALAPLDFIVLTATGGPDCLALIEGVKPDLFLVDISMPGMNGWQLVERLRDAGQSAPILMLSANIGDGAVREPGSGGHNDAIAKPVDVKMLRDKL
222149715	2.55067e+06	Agrobacterium vitis S4	_ sigma 54 dependent transcriptional activator _	25	MPVIVQTGQGGIDTVVQAMRAGAFDFVVKPVSPERIASAI
222107129	2.54792e+06	Agrobacterium vitis S4	_ two component response regulator for C4-dicarboxylate transport _	25	VILIDNDRDLLAATGQTLELAGFSVQAFSAPLDALRRISSDFRGVIVSDIRMPDIDGLELFSRVKAMDPELPVILVTGHGDIAMAVQAIKDGTYDFITKPFATDRLQQSV
222149013	2.54997e+06	Agrobacterium vitis S4	_ two component response regulator _	291	IIVAEDSNVFTSMITQRLKEIFNIDAEICRTYEDLMAANELSDEPVTLAISNINLPGAENGEALEYLTDLNIPTVVFTSTFHEKTREKLLAKDIVDYILKD
222106444	2.54724e+06	Agrobacterium vitis S4	_ two component response regulator _	2	ILIADDHDLARSGIISVLSGAPDLEVVAEARDGLEAITLAAQLLPDIALLDVRMTPMDGLTAATEIRRVSPSTRIMMLTMHDSLDYLEAAVKAGASGYALKDVRRDTLLRMI
222148303	2.54926e+06	Agrobacterium vitis S4	_ two component response regulator _	31	VMIVEDNELNMKLFRDLIEASGYATIQTRNGMEALELARKHHPDLILMDIQLPEVSGLEVTKWLKQDSELHVIPVIAVTAFAMKGDEERIRQGGCEAYVSKPISVPKFLETI
222147066	2.54802e+06	Agrobacterium vitis S4	_ two component response regulator _	32	LLIVDDDQPFLRRLARAMETRGFQVDIASSVAEGIAKAKTAAPKYAVVDLRLGDGNGLDVIQAIRESRTDTRIIVLTGYGNIATAVTAVKLGAVDYLSKPADADDVFNAL
222106442	2.54723e+06	Agrobacterium vitis S4	_ two-component system regulatory protein _	330	ILIIDDEPANIALLERLLRRERFDRIASTTDPREATALFTKHKADIILLDLLMPHLDGFALLDQFTRLIGPDDFIPILVLTADVTTETRRRALSLGAKDFLVKPIDTVETVLR
222148810	2.54977e+06	Agrobacterium vitis S4	_ two component sensor kinase _	36	VLLVEDEDAVRRGGKRMLETRGYTVHEACSGVEALEIMEELEGKVDIVVSDVVMPEMDGPSLLKELRKTYPDMKFIFVSGYAEDAFARNLPADAKFGFLPKPFSLKQLAIAV
222107038	2.54783e+06	Agrobacterium vitis S4	_ two component response regulator _	39	ILLVEDNKALADGLSAILRGTGYAVDTVSDGASADAAIATENFDLVILDLNLPEMDGIEVLRCVRARHDKVAILILTARGTPEDKVKGLDLGADDYMIKPFDIGEFEARV
222149445	2.5504e+06	Agrobacterium vitis S4	_ two component response regulator _	39	LLIVEDNHELADWLAKALTQANYTVDAAHDGEEAEDFLNLADYAAVILDLSLPKIDGMTLLKRIRRSGRKVPVIILTANASLDGRVAGLDSGADDYLAKPFEMAELEARL
222149562	2.55052e+06	Agrobacterium vitis S4	_ bacteriophytochrome protein _	40	ILLVEDQMLIAMDAEMMLGDAGFTTVMTAGSVPEALAQIKVTVPAVAVLDINLGNHTSVPVAQELHQRGIPFLFATGYAERSIIPEAFGDVTIINKPYDGEALADAV
222083194	2.5426e+06	Agrobacterium vitis S4	_ bacteriophytochrome protein _	40	VLLVEDNMLIALEAEDMLHELGAVHVALASTITEAEQLLAKHSFQFAMLDINVGRGTSFDLATKLGEAGTPFIFATGYGDELAIAGRKGSEVIIQKPYERDHLARAV
222148304	2.54926e+06	Agrobacterium vitis S4	_ response regulator PleD _	50	ILVVDDVPANVKLLEARLLAEYFEVLTAEDGLKALDICDRTQVDVVLLDVMMPGIDGFEVCERLKSSPRTAHIPVVMVTALDQPSDRVRGLKAGADDFLTKPVNDLQLISRVK
222083200	2.5426e+06	Agrobacterium vitis S4	_ bacteriophytochrome protein _	51	LLVDDLPENLLSLEALLRRPDLELVKARSGDEALELCLHHDFALALIDVQMPGLNGFELAELMRGNERTKRIPIIFVTAGAHSSERRFQGYEVGAVDFIQKPIEAHILR
222083203	2.54261e+06	Agrobacterium vitis S4	_ multi-sensor hybrid histidine kinase _	55	LLVVEDDQSFAMILRDLARELSFQVLVAGTAQEALELARQHAPSAIVLDVGLPDQSGLSVLDRLKRDVRTRHIPIHIISAEDYSERALSLGAIGYAMKPVQRDELLDVL
222149748	2.55071e+06	Agrobacterium vitis S4	_ chemotaxis response regulator _	57	ILLAEDDNDMRRFLVKALEKAGYKVSSYDNGASAYDRLREEPFSLLLTDIVMPEMDGIELARRATELDPDLKVMFITGFAAVALNADSKAPKDAKVLSKPFHLRDLVDEVN
222149959	2.55092e+06	Agrobacterium vitis S4	_ two component response regulator _	57	ILITEDEDALRSFVARALRLDGHETHEAADGAEGLEMLATSNFDLLLSDIRMPVMDGIELAHRAHSDFPGLKILLMTGYAEQRERADDLLEKIIDVVPKPFALPDIRKAV
222149588	2.55055e+06	Agrobacterium vitis S4	_ two component response regulator _	58	VLLIEDDSATAQSIELMLKSESFNVYTTDLGEEGVDLGKLYDYDIILLDLNLPDMSGYEVLRTLRLSKVKTPILILSGMAGIEDKVRGLGFGADDYMTKPFHKDELVARI
222106571	2.54736e+06	Agrobacterium vitis S4	_ response regulator _	60	MIVEDETLLALELEAEVEAAGHTVVGQAMSRAEAIEIIDREKPDFAFVDVHLLDGPTGIEVGRHLTERGIPYVFVTGNLRRIPPDFVGAVGAIEKPYTMNGLQNAL
222106943	2.54773e+06	Agrobacterium vitis S4	_ two component response regulator _	60	IMIIEDEPLIALDIEQMVEDLGHRVTGIARTHKEAVELYGRTNPKMVLADIQLADGSSGIDAINDILKVDTVPVIFITAFPERLLTGERPEPAFLVTKPFNPDMV
222083203	YP	Agrobacterium vitis S4	_002542606.1_ multi-sensor hybrid histidine kinase _	67	VLIVEDNQIQREAVSKLIGSQDVETVGAGTAAECLALLKEQTFDCMVLDLSLPDASGFALLETISQDTAHSFPPVIVYTGRVLSAEEEQSLRRFSKSIIIKGAKSPERLLDE
222148573	2.54953e+06	Agrobacterium vitis S4	_ nitrogen regulation protein NR_I_ _	68	ILVADDDAAIRTVLNQALSRAGYDVRITSNAATLWRWISAGEGDLVVTDVVMPDENAFDLLPRIKKARPDLPVLVMSAQNTFMTAIRASEKGAYDYLPKPFDLTELIAII
222150180	2.55114e+06	Agrobacterium vitis S4	_ protein-glutamate methylesterase _	6	VLIVDDSASVRQILTNVLQSDPDIEVIGAASDPFVAARRIAEEIPDVITLDVEMPRMDGITFLRKLMSQRPIPVVMCSSLTEAGSETLMQAMEAGAVDIILKPK
222150000	2.55096e+06	Agrobacterium vitis S4	_ chemotaxis-specific methylesterase _	6	VLVVDDSPTMRGLITAVLNSDPEVSVIGQAKDAMEARAAIKQLNPDVVTLDIEMPNMNGLEFLEKIMRLRPMPVIMVSTMTHRGAEATLAALEIGAFDCVGKPMPG
222147052	2.54801e+06	Agrobacterium vitis S4	_ two component response regulator _	73	IALVDDDRNILTSVSIALEAEGYKVETYTDGASALDGLLARPPQLAIFDIKMPRMDGMELLRRLRQKSDIPVIFLTSKDEEIDELFGLKMGADDFITKPFSQRLLVERVK
222106864	2.54766e+06	Agrobacterium vitis S4	_ two component response regulator _	75	ILVIDENAIRASIIEEGLREAGHLHVTVINEVQGIARSIETLAPDVIIIDLESPNRDMLEHLFQLSRSVSRPIAMFVDRADTESIAAAVDAGVSAYIVDGLRKER
222102784	2.53982e+06	Agrobacterium vitis S4	_ two component response regulator _	79	VLLIDDDTELTTILSEYLTGEGFTVFAVVNGKQGLAEIAARRIDMVVLDIMMPQMNGIDVLQRIRRVSEVPVLMLTARGDDVDRISGLNLGADDYVAKPCSSGELVARL
222107067	2.54786e+06	Agrobacterium vitis S4	_ two component response regulator _	79	VLLIDDDLEFTGLLCEYLTDEGFDVLSTDDGAKGLAFVDSGATDIIVLDVMMPIMNGVDVLQNIRKSSEIPIVMLTARGDDKDRITGLDLGADDYVSKPCSPGELVARL
222149999	2.55096e+06	Agrobacterium vitis S4	_ chemotaxis receiver protein _	7	VLIVDDQVTSRLLLSDALTQLGFKQITAAGDGEQGMKIMAQQPHHLVISDFNMPKMDGLGLLQAVRANPATKKAAFIILTAQGDRALVQKAAQLGANNVLAKPFTIEKMKAAI
222150117	2.55107e+06	Agrobacterium vitis S4	_ two component response regulator _	81	ILLVDDDDDLRETLVEQLSLYEEFSIQQESNATKGVQAARNGQVDLMIMDVGLPDMDGREAVKLLRKGGFKAPVIMLTGHDTDSDTILGLEAGANDYVTKPFRFAVLLARI
222148575	2.54953e+06	Agrobacterium vitis S4	_ two component response regulator _	83	ILVVDDEEDIRDIVSGILSDEGHETRTAHDADSALAAISDRAPRLIFLDIWMHGSRLDGLALLDEIKARHPDLPVVMISGHGNVETAVSAIKRGAFDFIEKPFKADRLI
222149565	2.55052e+06	Agrobacterium vitis S4	_ transcriptional regulator LuxR family _	8	ILLVDDSPEALGFLTDALEQSGFSVLIATSGQGALGIVERISPDLILLDAVMPGMDGFETCRQIKANPAVAQVPVIFMTGLSETEHVVHALEVGGVDYLTKPINIDELRARI
222083171	2.54257e+06	Agrobacterium vitis S4	_ chemotaxis response regulator _	94	RHPKINMLFTDVDMPGDMDGLKLAASVRNRWPPIRLIVTSALR
222106537	2.54733e+06	Agrobacterium vitis S4	_ two component response regulator _	9	VYVIDDDASVRAALEDLLASVGLAVCAYGSIQEFMAMPLADAPGCLVLDVRMPGQSGLEFHQQMTKLGIRLPVIFITGHGDIPMSVKAMKNGAIEFLTKPFRDQDLLDAIQ
187735359	1.87747e+06	Akkermansia muciniphila ATCC BAA-835	_ response regulator receiver protein _	15	IICVDDQPEVLDSVLRDLRPLNSCFRLEGVESASECRELLEEFDQDGELTGLIISDHVMPGGSGVELLGGIAKDDRFAGTRKILLTGQATHADTIQAVNDAHIDNYLEKPWDPAVLLAT
187735330	1.87744e+06	Akkermansia muciniphila ATCC BAA-835	_ two component transcriptional regulator, winged helix family _	19	ILIIDDERQIRRLLNLTLTGAGYHVRECENGQLGLSETALKRPDAIILDLGLPDINGLEVLKQLREWTQVPILILTAWDREDEKVDALDAGADDYLTKPFSGRELLARL
187734823	1.87694e+06	Akkermansia muciniphila ATCC BAA-835	_ two component, sigma54 specific, transcriptional regulator, Fis family _	4	LLIVDDEKPTRDALRMGFQDDYEVYTAANLSQASALLQEESPDLVLTDLRLGGESGMDVLKAAASLPHPPQSIMMTAYGSVDAAVAAMKEGAYDFVTKPLNLDA
187735605	1.87772e+06	Akkermansia muciniphila ATCC BAA-835	_ two component transcriptional regulator, winged helix family _	63	ILIAEDDHAISDLVAYNLERAGHTPLAAYDGLTALEVARRDKPELILLDQMMPGMDGHGVLRELRRDSRTQNIPVIFLTAKAQAEDRIQGLELGADDYVTKPFSPKELVLRV
110833833	692692	Alcanivorax borkumensis SK2	_ phosphotransferase-histidine kinase family protein _	0	VLIVEDNPVNQMVAKGYLQRLGVVHIIVAEDGQQGLDAFGAQSGNLDLVLMDLDMPVMDGFACARHIRDLEAERGWNPCQILALSAHAISEHSGRMSRSGMDGQLIKPLSLAAMKQAL
110833303	692162	Alcanivorax borkumensis SK2	_ sensor histidine kinase _	0	LLIVDDNHINLMVAEGLCQKLGYETEVAESGLEAIAVLMSTTQPFDLILMDCEMPDMDGFETSRAIIKLQQENRLPWVPIIALTAHAIPDKIRACRDAGMIGHLAKPVNLARLQTTL
110834714	693573	Alcanivorax borkumensis SK2	_ sensor histidine kinase/response regulator _	0	VLLVEDNPINAMVARRILERMGVCVVTAGNGHEALEKARQRDFDCILMDVQMPIMDGLAATRLLRQWEREQGRAPMPVVALTANAMNEERERCLAAGMNSHLAKPFRRQQLA
110834104	692963	Alcanivorax borkumensis SK2	_ sensor histidine kinase _	0	LMLVEDNEVNQLVTRGMLSKLGYQVKTVSNGETALALLEQEPFDLVLMDCMMPEMDGFEATRRQREMEHSKASPRTPIVAITANTAEGVQARCLAAGMDDFLAKPVHLDALETV
110834488	693347	Alcanivorax borkumensis SK2	_ sensor/response regulator hybrid _	0	VLLVDDHPGNLKLARVFLEELGVTVTACDSGQSALDTFQKHPFDLVFMDIQMPGMDGKETSKRMRAAEPDGTHTPIVALTAHALDSERRELLDSGLDDYLSKPITEEQLRHTL
110834879	YP	Alcanivorax borkumensis SK2	_693738.1_ sensor histidine kinase/response regulator _	0	LLVAEDHYLSQKVIRGMLGKLGLKADIASNGKEALELASKTRYDLILMDCEMPEMDGFEATRMIREHEQKQDLPAVPIVALTAHILREHKDRSLAAGMNAHLPKPVELNVLRNTL
110834459	693318	Alcanivorax borkumensis SK2	_ sensor histidine kinase/response regulator _	0	VIVAEDNAVNQLVIDSILKSLGIHATLVSDGEQALELVRNRPNHWDIIFMDCEMPIMDGYQASREIRALEAEHEAQPHCWIIALSAHATGDYVQKARDAGVDDYLSKPVSQQQVRDAL
110833129	691988	Alcanivorax borkumensis SK2	_ osmolarity response regulator _	11	ILVVDDDARLRSLLQRFLEEAGYTVKAVGDAEQMDRALSRELYSLMVLDLMLPGEDGLSICRRLREAENIMPIIMLTAKGDDAERIEGLDAGADDYLPKPFNPKELDARI
110833027	691886	Alcanivorax borkumensis SK2	_ phosphate regulon transcriptional regulatory protein phoB _	12	ILIVDDEPAIREMVAVALELADFDVLEAENAQRGHEIIVDERPDLVLLDWMLPSVTGIELARRLKRDETTNEVPIIMLTAKSEEDNKIQGLDVGADDYITKPFSTRELISRIK
110832969	691828	Alcanivorax borkumensis SK2	_ type IV pili response regulator PilH _	133	ILIVDDSPTETYKLREILERHGHEVIEAANGADGVATARSELPELVLMDVVMPGLNGFQATRQLTKGADTAHIPIVIVTTKDQETDRVWGKRQGARDYLTKPVDEDVLLQTVN
110832893	691751	Alcanivorax borkumensis SK2	_ transcriptional regulator QseB _	13	ILLIEDDALLGDGIQAGLQAMGFTVAWVTLARDGLAAWKSVDFDALVLDLGLPDQEGSEALCQWREAGLTVPVLILTARDAVQDRIDGLQRGADDYLIKPFDLGELAARL
110834862	693721	Alcanivorax borkumensis SK2	_ transcriptional regulatory protein _	13	LLLVENDVLLADGLQRALRAEGYTVDHIDRGDLLMPALEGGGFQLVLLDLGLPGLDGIDALKILRQKDKQIPVIIISARDALEDRIGGLDCGADDYLVKPFSAVEMIARI
110835380	694239	Alcanivorax borkumensis SK2	_ response regulator _	15	VMIVDDEEYILKALKRTINTYTDWDVETYQSPHEALRRARTTVFDAVITDYMMPEMNGLELLQELRELQPDTIRIVLTGVIDIETVMSAINKAGAFRFIPKPWDDEQLLDNI
110834879	693738	Alcanivorax borkumensis SK2	_ sensor histidine kinase/response regulator _	177	LLVVDDSITVTRVLRHHALSWGMRVTACHDPREALASLRTQANINEPYDVVVLDHHMPGIDGMQLAARIHEDPVIMHPTVLVMLTGINNAPTATQARNVGIHRVLSKPVSAPRLRQAL
110833573	692432	Alcanivorax borkumensis SK2	_ DNA-binding response regulator _	1	IMIVEDDERLADLTCEYLQSNGLGVTVVSDGEEAIRRIRADQPDLVVLDLMLPGADGLTVCREVRSAYKNPILMLTARTDDMDQVLGLEMGADDYVAKPVKPRVLLARI
110834226	693085	Alcanivorax borkumensis SK2	_ DNA-binding heavy metal response regulator _	20	LLLVEDDYLLTNGLSAQLEKAGFSVDTARTAREARHLGQQESYRAGILDLGLPDGNGLDVLKQWRTHKVSFPVLILTARGDWQDKVNGLKAGADDYLAKPFQTEELIARL
110834570	693429	Alcanivorax borkumensis SK2	_ DNA-binding response regulator _	20	ILLVEDSIALADQLMPMLREHGYAVDWLADGRDALPALNDDPFDLVILDLGLPGLDGLQVLEQWRVEGQAVPVLILTARDSWAERIEGLQSGADDYLAKPFHPDELLLRV
110833692	692551	Alcanivorax borkumensis SK2	_ DNA-binding heavy metal response regulator _	212	ILLVEDHRQLAQTVLEYLEQQGATVDYAGNTRLARELVQEHHYDLMLLDVMLPGEDGYSFCQYLREELALDMPVIFMTARDQLEDKLEGFDRGGDDYIVKPFALPELVARV
110835015	693874	Alcanivorax borkumensis SK2	_ transcriptional regulator DegU _	21	ILIADDHPLFRAALKQAVDTSFSGAAIHEADSLATLEELGQQGIPFDVILLDLHMPGTHGFSGLVYLREQYKKVPLVVISATEDVDVIQRAIHFGADGFIPKSASVDTMTQAM
110835379	694238	Alcanivorax borkumensis SK2	_ transcription regulator _	21	ILIVDDHPLFADALSITLKNAYAEAMITTCEQPKWLLDNRQFLPLYDLVILDQTMPHLDGLTLWSLIGRLVGGAKVLVCSGSATEATVRRAVQLKVNGFVDKSESVEQILFAI
110835016	693875	Alcanivorax borkumensis SK2	_ Na-solute symporter/sensory box histidinekinase _	24	VFCVDNDAALLASLVAALQSLGCEVVAARGLQEAEQKAAKSWVPDVILVDFQLDHEDGFEVIEALDHCWEDVVPAILMTADRRQDVRARAEEQGVGFLQKPISEAILRRAL
110835120	693979	Alcanivorax borkumensis SK2	_ two-component response regulator NtrC _	29	IWVVDDDRSIRWVLEKALGQEGYAVTCFEDADEALNTLEQGGQEPEVLISDVRMPGTDGLRMLKILQRKNPDLPVIIMTAHSDLDSAVASYQGGAFEYLPKPFDVDEAVALV
110834892	693751	Alcanivorax borkumensis SK2	_ response regulator _	32	LLIVEDDDAFARTLTRSFERRGYRVIHADSLESMQALLKSHEPGFAVVDLKLKGDSSGLACVQALHEHAEDMLIVVLTGYASIATAVEAVKLGACHYLAKPSNTDDIEEA
110833604	692463	Alcanivorax borkumensis SK2	_ DNA-binding response regulator _	32	LMLVEDDDLLAEQTARALGRHGIQVHVAHSREQALLVIAELNAQGTPPDGAILDQNLGNDNGLDLIEPIRQQFPRCRVILLTGYGSIAAAVAATHRGAHNYLTKPASANDILQSL
110833126	691985	Alcanivorax borkumensis SK2	_ PilH family regulatory protein _	43	ILVVDDSPTQRSNLVKIVQGQGHDVVTASNGMEGIEKAKQEHPDLILMDVVMPELNGFQATRKITRDPVTESIPIILVTTKDQETDKVWGERQGAFGYVVKPPQEAELVAKIN
110832970	691829	Alcanivorax borkumensis SK2	_ type IV pili response regulator PilG _	45	VMVIDDSKTIRRTAETLLKKAGCEVITATDGFDALAKIADSKPHIIFVDIMMPRLDGYQTCALIKNNSAFKATPVIMLSSKDGLFDKAKGRIVGSDEYLTKPFSKDELLGAI
110832965	691824	Alcanivorax borkumensis SK2	_ two-component hybrid chemotactic sensor and regulator _	47	VMVTDDSVTVRKVTTRLLERNGYEVVTAKDGMDAIAKLEDIRPDVMLLDIEMPRMDGFEVASHVRHDSRLQNVPIIMITSRTGEKHRERAFDIGVNCYIGKPFQESELLSTI
110833202	692061	Alcanivorax borkumensis SK2	_ nitrogen regulation protein NR_I_ _	4	ILIVEDEPVIRGALRKLLVRHEHSVEEAESVEQALENNLNQFDLIISDLRLPGEPGTNLIEAAGNTPVLIMTSYASLRSAVDAMRLGAVDYIPKPFDHDEMLLAV
110834170	693029	Alcanivorax borkumensis SK2	_ sensory box protein/response regulator _	51	LLLVDDQPANLVSLEAILESEGRILMKAHSGQEALKILLKEDISLVLLDVQMPGMDGFEVAELMRQRKDTQTIPIIFVTAISKEKKYVFRGYQAGAVDYLFKPLDPLILKSK
110834172	693031	Alcanivorax borkumensis SK2	_ sensory box protein/response regulator _	51	ILVVDDHRENLIALEAILDSDDRNLIMAQSGNEALSLALKHDLALVLLDVQMPEMDGFEVAELMRKNKKTRHIPIIFVTAISKEQKYVFKGYECGAVDYLLKPIDQKILEAKV
110834168	693027	Alcanivorax borkumensis SK2	_ sensor histidine kinase/respose regulator _	55	VLIVEDDDEFARVLVELASDYGLEGHVCHDGEDGLEYASHYRPSAIILDIGLPGIDGWEVMEKLKADPRTKDIPVHFLSGRDERNKALEMGALDFMSKPANEDDIL
110834165	693024	Alcanivorax borkumensis SK2	_ DNA-binding response regulator GacA _	59	VLVVDDHDLVRTGIARMLDEVDGLQVVGEANSGERAIQMVRELAPEVVLMDLKMPGIGGLEATRKLLRVDEGIRVIAVTMCEDEPFPSRLMKAGAAGYMTKGADLEEMVRAIK
110835184	694043	Alcanivorax borkumensis SK2	_ alginate biosynthesis regulator _	5	VLVCDDEQLARDRLKRLVDKIENAEVVAEAGNGREAIIEAQSCKPDVVLMDIRMPEMDGMEAAEHLSKMDNPPALIFCTAYDEHALQAFRVHAVDYLLKPVNAADLTAALN
110834168	YP	Alcanivorax borkumensis SK2	_693027.1_ sensor histidine kinase/respose regulator _	67	LLVVEDSQIQHESIRELFNQKGVEITAATNGQQALDALKSTVFDCMILDLTLPDMSGFELLETLHANDDYGRVPVVVYTGKDMSREEEAKLRKYADRIILKTE
110835404	694263	Alcanivorax borkumensis SK2	_ DNA-binding heavy metal response regulator _	70	EDDMAQAELVTHWLKEAGHNCIHMASGRDFMSLLRRDTFDILVLDWEVPDMNGYAVLEEVRASGNRTPVLFATQRDDESSIVGALSQGADDYMVKPTKQAELLARI
110834168	YP	Alcanivorax borkumensis SK2	_693027.1_ sensor histidine kinase/respose regulator _	71	LLLVDDDMRNIYALSAQLEELGFSIHIANNGREALQVLDDNPSIDIVLMDIMMPEMDGYEAMARIREQSQFSKLPILALTAKAMKNDRAKCIEAGANDYCSKPIDMAKLTSL
110833720	692579	Alcanivorax borkumensis SK2	_ nitrogen assimilation response regulatory protein _	75	IMLVDDQPPRAAILERALIDEGHKILCRLTSAAGLAEKVRSSNPDVVIVDMDAPDRDTLESMALVQRDMPRPMVMFCHQDDEDLVVAALRAGVSAYVAGETDLTR
110834552	693411	Alcanivorax borkumensis SK2	_ DNA-binding response regulator _	79	LLVIEDDSVLSGHLLDYFSERHYLVSVCAEGPAGLDAATAGDYDLVLLDILLPGLNGLELLNALRQQSPVPVIVVSALGDEQARIQGLINGADDYLPKPFSMAELAVRV
110834848	693707	Alcanivorax borkumensis SK2	_ LuxR family DNA-binding response regulator _	8	ILVVDDSPDSLGMIHQALDQAGLTALIALEGQQALNIAEKMTPDLILMDAIMPNLDGFETCRRLKQHPNLACVPVIFMTGLTESEDVVRGLEAGGVDYITKPVRPNELIARIR
110833332	692191	Alcanivorax borkumensis SK2	_ sigma-54 dependent DNA-binding response regulator _	95	VLVVDDEADLRELLVITLGRMKLQATAADSLSTAKQRLKEAHYDLCLTDMNLGDGTGLELLQFISQYCPTMPTAVITAYGSMKTATDAMKYGAYDFIAKPVALDRLRQLI
209808886	2.26442e+06	Aliivibrio salmonicida LFI1238	_ membrane associated response regulator,histidine kinase _	0	VLIVEDNKINQQVVSINLKMLGIEYKIANNGAEAVELYKRHHEEILVVLMDCMMPVMDGFEATKAIRQLEKNEDITLTTIIALTASILDDDIQKCFDSGMDDYLPKPFRREILQEKI
209808890	2.26443e+06	Aliivibrio salmonicida LFI1238	_ putative membrane associated response regulator _	0	LIVEDDKVQQFILNKILTGFEFQSEGVDDGEKALALVKENNFDIIFMDCIMPGMGGMEATSLIRQYEKEHHLPPTTIIGATALTSNKEHKQCIDAGMDYVISKPYKNEEIYAVI
209695063	2.26299e+06	Aliivibrio salmonicida LFI1238	_ response regulator, histidine kinase _	0	ILIAEDSKANQAVIQLLLEGQGHQITLVDNGCMAVEAIENKNQNFDLILMDVSMPIKDGISATKEIRAKGYNLPILALTAHAMNEEKKTCIDAGMNDFISKPVRAQELKL
209809112	2.26465e+06	Aliivibrio salmonicida LFI1238	_ response regulator, histidine kinase _	0	LLVVEDNLANQIVIKNTLSYAGYTIDIANNGKEAISMVTDTDYDLIFMDISMPEMDGMTATKKIRTLSKHHEKMPIIALTAHALSGDKERFIDAGMTDYLSKPFNRTALLE
209694706	2.26263e+06	Aliivibrio salmonicida LFI1238	_ autoinducer regulatory protein AinR _	0	ILIVDDKKVQRMLIQTFIAQDNMNILQAENGEEAISIAMNHPLDIIFMDSRMPVMNGIDAAKRIKLSYPNLPIIALTGESGHDEIQRISQVMDGYLTKPISKPQLIQTL
209695572	2.2635e+06	Aliivibrio salmonicida LFI1238	_ response regulator, histidine kinase _	0	LLLVEDNPVNQMVATGFLERLGHKVTAVDTGQLAEEQVKEHQFDMLLLDINLPDTDGVTLQKRLRAIENEYHGEECYTPTLAVSAHVFTEDVESYLAAGFDGFLGKPLVENQLVKML
209694498	2.26243e+06	Aliivibrio salmonicida LFI1238	_ autoinducer 2 sensor kinase/phosphatase LuxQ _	0	VLLVEDNKSNAYIAKAYCQKYSLDVTWVTSAAEGIQMIKEHSFDLVLMDNQMPEMSGIEATRYIRKILNLSLPIYAYTADVLEDATNEFLSAGADYIITKPIKEKSILDAL
209809192	2.26473e+06	Aliivibrio salmonicida LFI1238	_ response regulator, histidine kinase _	0	ILVAEDNKVNALVAKMFCERLGHQVVVVENGQLAIEALRLQVFDLIIMDNHMPIMDGISATKIIRKELKLPTVIFACTADVFQEAHDNFIEAGANYVLTKPLQEQGFMDAI
209809121	2.26466e+06	Aliivibrio salmonicida LFI1238	_ response regulator, histidine kinase _	0	ILIVEDNLVNQKVASLFLSRSGYTFEIANNGQEAIEKFTESEAYNVILMDCMMPVKDGFSATKEIRLLEKAQNRKKIPIIALTASVLDQDITKCYESGMDAYVAKPFKKEVLLNQI
209695938	2.26387e+06	Aliivibrio salmonicida LFI1238	_ hybrid sensory histidine kinase BarA _	0	VMAVDDNPANLKLISALLHEQVESVVTCKNGIDAVQQATEQKFDIILMDIQMPKMDGVMACKEIRKTALNSGTPIVAVTAHAMAGERERLISEGMDDYLTKPIEEHVLQQV
209809753	2.26529e+06	Aliivibrio salmonicida LFI1238	_ response regulator, histidine kinase _	0	VLAVEDIKMNQVILSMMLTKLDIHPYFANDGQQALAFLESEVVDVILMDCRMPVMDGFETTRRLREQGYTKPIIALTAGTTSTEMASCIEAGMDDILHKPYKAKELEKML
209695992	2.26392e+06	Aliivibrio salmonicida LFI1238	_ chitin degradation sensor protein _	109	LLVADDEPVNLQVLSSFLKLEGYRVKTANDGPETLKQLEEETPELVLLDVMMPGMSGYEVCQEVRKQYSHSQLPIIMLTALNQTQDRVRGFESGANDYLSKPFNKQELAARIK
209809014	2.26455e+06	Aliivibrio salmonicida LFI1238	_ transcriptional activator protein, response regulator _	10	LLIIEDETKAGDYLKKGLTESGYTVDLSRDGVDGLYNATTYQYDLIILDVMLPKLNGWQILQTLRNCENSTPIIMLTAKDQVDDRVKGFELGANDYLIKPFAFAELKARI
209809498	2.26504e+06	Aliivibrio salmonicida LFI1238	_ transcriptional regulator, response regulator _	10	ILVIEDDQTTREFIAKALEQEGFIVDNSGDGKEGLMMAISCEYQLIVLDRMLPNIDGLKILSAIRATGNNTPVLILSALDSVDQRVEGLIAGSDDYLTKPFALAELLARIN
209809156	2.26469e+06	Aliivibrio salmonicida LFI1238	_ putative two-component response regulator _	10	ILLIEDSEHLRRSLVVGLSNLGFTIDETGDGSKGLSMAITNDYDFIILDLMLPNVDGITLLKSIRKMGNDVKVIILSAKSLPEDRVEGLLSGADDYLVKPFSFDELHARI
209693817	2.26175e+06	Aliivibrio salmonicida LFI1238	_ osmolarity response regulator _	11	ILVVDDDARLRSLLERYLSEQGFQVRSVANSEQMDRLLARETFHLMVLDLMLPGEDGLSICRRLRSNNNMLPILMLTAKGDEIDRIVGLEVGADDYLPKPFNPRELLARI
209695880	2.26381e+06	Aliivibrio salmonicida LFI1238	_ response regulator homolog PhoB _phosphate regulon transcriptional regulatory protein_ _	12	ILVVEDEAPIREMLCFVLEQKGYEPIEAEDYDTALALLCEPYPDLILLDWMLPGGSGINLIKHLKRDEFTKKIPVVMLTARGEEEDKVRGLEVGADDYITKPFSPKELMARL
209809430	2.26497e+06	Aliivibrio salmonicida LFI1238	_ transcriptional regulator, response regulator _	208	LEEAGYNCIHSDNATDVSSFWAEADIVILDRQLPEGDSLTWLPEWKQIKDIPVILLTALVSIRDKVTGLDSGANDYLTKPFAEAELLARL
209695438	2.26337e+06	Aliivibrio salmonicida LFI1238	_ transcriptional regulator _	20	ILVVEDDQRLGQQIIDALEANNWTPELSQDGIDALYRATSESWDAIVLDLGLPKLDGLTVLKGLRDESVNIPVIILSARDTLTQRIDGLNAGADDYLTKPFELPELIARL
209696228	2.26416e+06	Aliivibrio salmonicida LFI1238	_ LuxR family transcriptional regulator _	21	IIIADDHPLFRNALFQSIHMAISGANLLEADSLDALLTVLEKEPDPDLLLLDLKMPGSNGMSGLIHLRSQYPDLPIVVVSASEESSIVSQAKSHGAFGFIPKSSDMRSLISAL
209695741	2.26367e+06	Aliivibrio salmonicida LFI1238	_ sigma-54 dependent response regulator _	220	VLIVEDDEGLREALIDTLELAGYEWVEADSAETALLILKKEPVDIVVSDVQMAGMGGLALLRSIKLNWPNLPVLLMTAYANIEDAVSAMKDGAIDYMAKPFAPEVLLNMV
209809044	2.26458e+06	Aliivibrio salmonicida LFI1238	_ chemotaxis protein CheV _	22	VLTVDDSSTARAQVRSTLQQLGLEVIECSDGLQALNLLKRWCDEGKVVTDEILLMITDAEMPEMDGYRLTHEIRNDPRMRDLFITLNTSLSGSFNDAMVQKVGCDRFISKFQPD
209809290	2.26483e+06	Aliivibrio salmonicida LFI1238	_ putative chemotaxis protein, CheW-like _	22	IMLVDDSVVARKQLSSALDSINIPYQVATNGLDAYERLKQASQEQRPFDIIVSDIEMPGLDGYELAFEIQNDVRLKDAYIILHTSLSSEICVEQAHQVGAHEALTKFEATELVQA
209695767	2.2637e+06	Aliivibrio salmonicida LFI1238	_ chemotaxis protein methyltransferase CheV _	22	VLIADDSSVARKQVQRAVQSIGFETIMVKDGKEALDKLVDMANAGSVYEQIGLVISDVEMPEMDGYTLTAEIRREPALKDLHVILHTSLSGVFNQAMVERVGANQFIAKFNPDELGAAV
209696233	2.26416e+06	Aliivibrio salmonicida LFI1238	_ membrane associated response regulator, histidine kinase _	24	VLCVDNEPDILIGMESLLERWGCEVKTATDLMGSLRCLEEGWVPDVIFSDYRLDNDRTGLEVLQQCRLRLGNNFEGVMISADKTEDLLESIKSNGFGFIAKPVKPLKLRSV
209695623	2.26355e+06	Aliivibrio salmonicida LFI1238	_ HTH-type transcriptional regulator, two-component response regulator _	30	IVIVEDDIAIAEIHRRNLDKIDAVEVIGIAASKEEADTLFDVLNPDMVLLDIYLPDGNGLDILRELRQKENSPDVILITADRDVNTLQEAMRGGVIDYLLKPVIFSRLEESI
209809181	2.26472e+06	Aliivibrio salmonicida LFI1238	_ response regulator, histidine kinase _	31	IAIVDDIEFNREVLKRKLEPYDFHIIEGINGKDILEKIKNTSSLPDVIFTDIKMPIMNGIELSRRIKDSKDMKHIPVIAITAQGMLDEETKIKKYCDGYLIKPIDNKSL
209695341	2.26327e+06	Aliivibrio salmonicida LFI1238	_ two component signal response regulator LuxO _	37	VEDTASVAALYRSYLNPLGLDIDVVAKGVDAIEKVTLKAPDLILLDLRLPDMTGLEVLTEIRKIHHDTPVVLMTAHGSIDVAVEAMRLGAQDFLIKPCEADRLRVTV
209695976	2.26391e+06	Aliivibrio salmonicida LFI1238	_ two-component response regulator _	38	ILIVEDEHVTRNTLKSIFEAEGYNVFEASDGEEMHTVLSEQQLNLVIMDINLPGKNGLLLARELRERGDMALMFLTGRDNEVDKILGLEIGADDYITKPFNPRELTI
209695444	2.26337e+06	Aliivibrio salmonicida LFI1238	_ DNA-binding transcriptional regulator TorR _	38	ILVVEDEVVTRSKLVGYFEAEGYQVSEAETGAEMRTVLAEQKVDLIMLDINLPGEDGLLLARELRSQSNIGIILVTGRTDSIDRIVGLEMGADDYVTKPVELRELLVRV
209695795	2.26373e+06	Aliivibrio salmonicida LFI1238	_ nitrate/nitrite response regulator protein NarP _	3	VVIVDDHPLMRRGIGQLLSFEDEFTLAGEASNGTDAVALISKDEPDLVLLDLNMKGMSGLDTLHALRNEGVTCPIVILTVSDNKQDIKTLIKAGADGYLLKDSEPDELIALL
209809215	2.26475e+06	Aliivibrio salmonicida LFI1238	_ two-component system response regulator _	53	VLIVEDNHHVAETIADYLELVGIDIDCAYHGVAAIEILKNQSFDAIVMDIMMPKLDGISTVQALRNDYACSTPIIFLTAKDTLEDKIHAFEAGGDDYLVKPFAMEELHIR
209695582	2.26351e+06	Aliivibrio salmonicida LFI1238	_ response regulator _	59	VFLVDDHELVRTGIRRILEDVRGIKVVGEADSGEDAVKWCRTEQADIVLMDMNMPGIGGLEATKKILRFNPDMKVIVLTIHTENPFPTKVMQAGAAGYLTKGAGPDEMVNAIR
209694849	2.26278e+06	Aliivibrio salmonicida LFI1238	_ two-component response-regulatory protein YehT _	5	IVIDDELFAREELIEQLNEIGHIEIIAECGNAIDGLKQINQHKPDVVFLDIQMPKITGMDLISMLDPDTMPNVVFVTAYDEFAVKAFEDNAFDYLLKPIDPCRLKKTVK
209809388	2.26493e+06	Aliivibrio salmonicida LFI1238	_ putative response regulator _	61	ILICDDSALARKQLARVIPQSWGANIQFAMHGWDAINQLESSSFDLLFLDLTMPELDGYGTLDEINSRHIKTQVIVVSGDIQPKAQEKVLALGARAFIKKPVDKATLLSTL
209809678	2.26522e+06	Aliivibrio salmonicida LFI1238	_ response regulator protein _	61	ILICDDSTIARKALASNIDPSPNIEIFYAENGKEGLQILSQHSIDVLFLDLTMPVMDGFEVLSALPVNSHHTNIIIVSGDIQEKAKQRCFNLGAKGFIEKPFKKEEIS
209695718	2.26365e+06	Aliivibrio salmonicida LFI1238	_ chemotaxis-specific methylesterase _	6	VLVVDDSSFFRRRVSEIINSDPRLEVIDVATNGKEAVEKAQSLKPDVITMDIEMPVMDGISAVREIMKVCPTPTLMFSSLTHDGAKATLDALDAGALDFLPKKFED
209696203	2.26413e+06	Aliivibrio salmonicida LFI1238	_ CpxR family transcriptional regulator _	79	ILLVDDDVELTALLKDILNLEGYTVVEANNGIEGLNAITDDLDLILLDIMMPKMNGMDMLRKLRETNETPVLMLTAKGEEIDRVIGLELGADDYLPKPFSDRELLARI
209695721	2.26365e+06	Aliivibrio salmonicida LFI1238	_ chemotaxis protein CheY _	7	ILIVDDFSTMRRIVKNLLRDLGFNNTQEADDGLTALPLLKKGGFDFVVTDWNMPGMQGIDLLKTIRADGELKHLPVLMITAEAKREQIIEAAQAGVNGYIVKPFTAATLKEKL
209809120	2.26466e+06	Aliivibrio salmonicida LFI1238	_ putative response regulator _	7	ILIVDNCQVASMFLKKLLFQLGFTRVEKASSYQEAIKKCAKRNYSLLFIDYHLDQRLNGSELYDLLREKGFISPSTRVITISGDHSTQTVLSTLSKGNGDYLCKPISKSNLHNKI
209695978	2.26391e+06	Aliivibrio salmonicida LFI1238	_ aerobic respiration control sensor protein ArcB _	86	IFMLEDIELNITVARSLLESLGHTVDVAMCGEDAINQFDPTNYDLALLDIQLPDMTGFDVAQIFREKYEELPPLVALTANLLKEKDEYFEKGMDEAISKPLSVKALTEVL
209808885	2.26442e+06	Aliivibrio salmonicida LFI1238	_ response regulator protein _	8	IVIVEDDPVSRQVLHHLLKPLPSILTQNGAEALDVILNESIDLVLLDIHMPVMGGFEVIERLKNDDKTKDIPIIVITVNHSKEDEIRALDLGAVDFITKPFNAVILQKRV
114321737	743420	Alkalilimnicola ehrlichii MLHE-1	_ response regulator receiver/ANTAR domain-containing protein _	101	VMLVDDSPERSAWLEESLQVAGFTVVATVQGADDLYQRVLDEEPEVIITEAGSGKRDTLEGLCSRGGRYPGPVMNGSVHHDPELMSTAAAAGLS
114320304	741987	Alkalilimnicola ehrlichii MLHE-1	_ two component transcriptional regulator _	11	ILIVDDDPGLRELLVDYLGQNGLEARAVPDGTALWPALEAGPVDLLILDLMLPGDDGLELCGQLRAADAPWRTLPVIMLTARGEETDRIVGLELGADDYLPKPFNPRELLARI
114320264	741947	Alkalilimnicola ehrlichii MLHE-1	_ two component transcriptional regulator _	12	ILLVEDDAAVREMLLLPLRRAGFEITGVADVAQGKAALLERVPDLILLDWMLPDVSGIDWARELKRDPFTRDVPLIMLTARGEEEDKVRGLEVGADDYVTKPFSPRELIARIR
114319382	741065	Alkalilimnicola ehrlichii MLHE-1	_ two component sigma54 specific Fis family transcriptional regulator _	13	CLIEDDPIMGESLQDRFTLEGFQVDWFVTAAQAREHLRGGGYAAAISDIRLPDQEGDALYLSLKRDGQVLPPFIFITGHGAIETAVQLLKEGAADYVTKPFDLDELVTKVR
114321161	742844	Alkalilimnicola ehrlichii MLHE-1	_ two component sigma54 specific Fis family transcriptional regulator _	15	ILVVDDEPRALQTLRRVLDEDFRVLTANDAEEAIAVLETEFVQVVLSDQRMPGTTGVELLRRVRTRWPDVVRLIISGYTDPADMMSAINDAGIYQFVHKPWQPEGLLLTV
114321203	742886	Alkalilimnicola ehrlichii MLHE-1	_ response regulator receiver protein _	1	VLVVDDEPNIVLSLRFLMQAEGYPVHVACDGCQALELARVHRPRVILLDLMLPGEDGYEVCQRLREVPGGRDAGVIMLTARGRQTEREKGLALGADDYVTKPFSTRDLLRRV
114321652	743335	Alkalilimnicola ehrlichii MLHE-1	_ two component transcriptional regulator _	20	LLVVEDEPALRRQLADALGRAGYVVDQAADGREGLHMARDYPLDLAIIDLGLPRFSGLELIRALRADGRTLPVLVLTARGHWQDRVTGLEAGADDYLVKPFEMPELLARV
114320052	741735	Alkalilimnicola ehrlichii MLHE-1	_ response regulator receiver modulated CheW protein _	22	VLVADDSVIARRQVVHTVEDLGLACTAVRDGLEALEQLKAWTGETPSPLDRLLMVISDVEMPRMDGYTLTSRIRTDEALQGLHVLLHSSLSGVFNERMVQQVGADDFLSKFRSNELAARV
114321320	743003	Alkalilimnicola ehrlichii MLHE-1	_ response regulator receiver modulated diguanylate phosphodiesterase _	241	ILVVDDDKDFAEEIEQFLLNFDSQVQKAHSINQARAITTRQAFDLVLVDLSLPDGDGLDLLAHLARVAAPDTAVALISGSDDGLRQAATDLANDMGLTVLGHLSKPVDLPALQA
114319182	740865	Alkalilimnicola ehrlichii MLHE-1	_ nitrogen metabolism transcriptional regulator NtrC _	29	VWVVDDDRSIRWVLQKALERAGFKVTCFDTAERVLRALERNQPDVLLTDIRMPGVSGLDLLAQVGDRWPDMPVIVMTAHSDLDAAVASYEGGAFEYLPKPFDVDEAVELV
114320794	742477	Alkalilimnicola ehrlichii MLHE-1	_ response regulator receiver protein _	32	VLLVDDDEVFCSVLGRGLTRRGYRVEKAHDAEQALVVARDYQPEHVVLDLKLGDDSGLKLIQPLLEAVPEARIIVLTGYASIPTAVEAVKLGAANYLPKPVDVDTVVSA
114320533	742216	Alkalilimnicola ehrlichii MLHE-1	_ two component sigma54 specific Fis family transcriptional regulator _	37	ILLVEDDQGLRDLLHEEFEDSGAQVQAVAAAEQAAPLLLAWEPDLVVSDLRLPGADGMALLAQARELHVPPAFLIITAFGSIDQAVEALKAGADEFLTKPLDLEHLML
114319420	741103	Alkalilimnicola ehrlichii MLHE-1	_ two component sigma54 specific Fis family transcriptional regulator _	389	VLVVDDEPDIRDLLGITLRRMGINCRTAASLREARDRLQEQAYDLCLTDMRLPDGNGIELVRYIQKRFPDMPTAVITAYGNMDTAVEAMKAGAFDFVPKPLDVDTLRQVV
114321869	743552	Alkalilimnicola ehrlichii MLHE-1	_ two component LuxR family transcriptional regulator _	3	LLLVDDHAVVRAGYRRLLEQASRCWQVTEADSGESAYRACARERFDVVVMDISLPGISGLETLARLQRRAPEIRVLIFSMHEEPVFAEQALSGGAAGYITKSSAPEVLVEAVQ
114320166	741849	Alkalilimnicola ehrlichii MLHE-1	_ two component LuxR family transcriptional regulator _	3	IFLVDDHPLLRRGLGQLLEAEPDLELAGEAGSGEQAMALLPGSGADLVLLDLNMRGMGGVRTLEAIRASGMKLRVVVLTVSNAAEDVHAALQAGADGYLLKDMEPEALVAEL
114319790	741473	Alkalilimnicola ehrlichii MLHE-1	_ response regulator receiver protein _	404	RQPGNARVLAAAAEEAGMAAARAPTADALQALLKQRDGHWVALVDPTGFGQAVWPLCQQLQDCRVPFVVLFASQDRDAGNRSLQYGAASILRKPVAKDALLKLL
114321770	743453	Alkalilimnicola ehrlichii MLHE-1	_ two component sigma54 specific Fis family transcriptional regulator _	41	ILVVDDEQEIRDLVEEILKDEGYRVRTAHDGASAREAMRDPVPDLVLLDIWMPDVDGVTLLKEWTEGGGPACPVVMMSGHGTVETAVEATRLGAWDFIEKPLSMPKLLLTV
114319517	741200	Alkalilimnicola ehrlichii MLHE-1	_ response regulator receiver protein _	45	VMVIDDSKTIRRTAETLLKKEGCEVITATDGFEALAKVAEHRPDIIFIDIMMPRLDGYQTCALVKNNPAFRATPVIMLSSKDSLFDRARGRIVGSEQYLTKPFTRGELLDAIR
114319521	741204	Alkalilimnicola ehrlichii MLHE-1	_ CheA signal transduction histidine kinases _	47	VMVVDDSITMRKVATRLLERNHMDVVTARDGMEALTRLEQQVPDVMLLDIEMPRMDGFELATHMRNQPEFSEVPIIMITSRVGDKHRRRAEDIGVQRYMGKPYQESELLAAI
114319843	741526	Alkalilimnicola ehrlichii MLHE-1	_ response regulator receiver modulated PAS/PAC sensor-containing diguanylate cyclase/phosphodiesterase _	48	LLITEESPNDAEIYVSVLRNSGYAVRARRIDGIDNLRETLQEKPADLMLCSLALRQVPVDTARQLIQQFGKDIPVIATCDEPSQEQRRYAMQMGAQDLVSKSDLEHLK
114319835	741518	Alkalilimnicola ehrlichii MLHE-1	_ two-component response regulator CbrB _	4	LLIIEDEAVIRSALRRLLTRNGYRVAEAESLEEAREGHRFADYDLIIADLRLPGEPGTGVIPLASEVPVIIMTSYASVRSAVEAMREGAVDYIAKPFDHDELLLTV
114321300	742983	Alkalilimnicola ehrlichii MLHE-1	_ two component LuxR family transcriptional regulator _	4	VLVVDDEKYIVEEIVEYLSELGYDCESATSADEARKKFFERKDIKVVITDIKMPGEDGITFAGWLIDSFEADRVFEVAVLTGHGSHSNAIAALRSGVREYLQKPVNLDQLA
114319850	741533	Alkalilimnicola ehrlichii MLHE-1	_ response regulator receiver modulated PAS/PAC sensor-containing diguanylate cyclase/phosphodiesterase _	4	ILAVDRHPRLLESLDMLANARGIPLDTAETPAEARTLVRQREYGVVLVDMQAEDTASLDLMEWLHNHRAGMDVIALTADPTCRAPIEALRRGASEFIRKPFAPEAMLATL
114321818	743501	Alkalilimnicola ehrlichii MLHE-1	_ response regulator receiver protein _	5	VLVVDDEPWARRRLAEMVDAEQGHRVVAEAGTGEQALAATREHQPDLILLDIQMPGMDGLEVARRIARRERPPGVIFITAHPEHALAAFEAKASDYLLKPVRPDRLRAAL
114320149	741832	Alkalilimnicola ehrlichii MLHE-1	_ chemotaxis-specific methylesterase _	6	LVVDDSGFFRRRIKSMLEEHPGIEVVGEAANGRQAVEQAQKLRPDVITMDIEMPEMDGITAVREIMRRQPTPVLMFSSLTYDGARETLDALDAGASDFIPKRFA
114320146	741829	Alkalilimnicola ehrlichii MLHE-1	_ response regulator receiver protein _	7	ILIVDDFSTMRRIIKNLLRDLGFNNTVEADDGKTALPILKRGGIDFLVTDWNMPGMSGLDLLKEVRADPELKDLPVLMVTAEAKRDQIIAAAQAGVNGYIVKPFTAVTLREKI
114320954	742637	Alkalilimnicola ehrlichii MLHE-1	_ response regulator receiver protein _	7	VLIVDDFQPMRSLLNTMLRQMGFENIDQAHNGRSALESFRGRKQPLVFLDISMPDMTGLEVLRELRELEGGDQAFVIMQTGDATRDNVLEAKELGVGGFIAKPYNMQKVKA
114320849	742532	Alkalilimnicola ehrlichii MLHE-1	_ two component sigma54 specific Fis family transcriptional regulator _	89	VLVIDDEPGVRNFLERALVRHFRHVRVAANVKEAEAAREEGHYDLIISDIRLPGVSGVDWVEAVRAQGDPTDVIFITAYADLETAIAALRAGASDFILKPFRMDQLYTAI
114321576	743259	Alkalilimnicola ehrlichii MLHE-1	_ response regulator receiver modulated metal dependent phosphohydrolase _	8	VLVVDDNPANLRLMVSVLREGGYAVRVAPSGRLALDSVQARPADLILLDIRMPDLDGYEVCRRLKADPARHDIPVIFLSALCEPADKVRGFAVGAVDYITKPFVAEEVLVRV
114319319	741002	Alkalilimnicola ehrlichii MLHE-1	_ two component sigma54 specific Fis family transcriptional regulator _	91	LLIVEDDQGLQSQLRWCFEGYDVLLAADRASAMAQVRRHAPQLVTLDLGLPPDPANASEGLAVLEEILSVAPETKVIVVTGNDDRANALQAVALGAYDFYIKPVDADMLRLI
114320774	742457	Alkalilimnicola ehrlichii MLHE-1	_ two component LuxR family transcriptional regulator _	9	MDDDEDIREAITFLLVAEGIMVRPYEDAGGLLERLTPKHTGCLILDVRLPDMDGLTLQRELRQRGIDLPVIFITGHGDIPMAVRAVNDGALDFLEKPFRDDALLEAVE
114320983	742666	Alkalilimnicola ehrlichii MLHE-1	_ two component LuxR family transcriptional regulator _	9	VFVVDDDHAVRESICDLMRAHGLSVRGFSDAWTFLEAVDEQSRGCVVLDVRMPGLSGLGLQKALNARGVELPVIIVTGHGDAETAITAMKHGAVDFLCKPFRGAELLRKV
150389840	1.31989e+06	Alkaliphilus metalliredigens QYMF	_ PAS/PAC sensor hybrid histidine kinase _	0	ILCVEDNIMNQEVMESIVTKKGYQYLAAYNAKEALDILENKKVHLILMDIQLPDLNGFEITKSIRMAKGPMKDVPIIAVTAYVDHKIENKCIQAGINDYMPKPLDLEKLYEML
150388840	1.31889e+06	Alkaliphilus metalliredigens QYMF	_ histidine kinase _	0	ILVAEDDLLNQKIISAQLKVLGYDFEIVSDGGEVLRALGKNHYDLILMDYHMVGINGLKTTEMIRKMEEKTQRHTMIIALTASAIAEAKQEGTKRGMDDYLSKPINLNELSEKL
150390925	1.32097e+06	Alkaliphilus metalliredigens QYMF	_ response regulator receiver protein _	113	IVDDDKVIQKILKGIILNQNLGSLIGTSDNGRTAIEEIKELKPDIVLVDLLMPQIDGIGVVSALRDTGCNSLFIMISQVDSKEMISGAYKEGIAFYINKPINVVEV
150390493	1.32054e+06	Alkaliphilus metalliredigens QYMF	_ putative CheW protein _	123	ILIAEDSQMLAKILEECLKEAGYDDLTITSNGKEAWDILQEVENRQDKKPYEIFSCVITDIEMPQMDGHHLIKCIKEDAILKDLPVVIFSSLISEQIMEKGKKLGANAQISKPEIKKLVEVI
150389071	1.31912e+06	Alkaliphilus metalliredigens QYMF	_ response regulator receiver protein _	12	LIIDSPGENMDHLKSVLRKHGYEVEQQKISDTDVNTIFISMPHIIFISIDSEAEEKLNVIKKLKENEDTKHIPIIFGVEKREKVKGISHLEYKVDDYMLKPIDEEELISKI
150392423	1.32247e+06	Alkaliphilus metalliredigens QYMF	_ two component transcriptional regulator _	13	ILLIEDEEMLSAIIAKGLRKVGYAVDTVFDGEEALEYYEIYEYDIIILDLNIPKIDGLNVLRTIRKKDTDQKILILSARTKVDERILGLDEGANDYLIKPFDFGELEARI
150388450	1.3185e+06	Alkaliphilus metalliredigens QYMF	_ response regulator receiver protein _	18	VLIVDDAGFMRMTIKDVLTKNGYEVVGEAENGLKAVEKFKELEPTLTIMDITMPEMNGIEAVKEIKKIDANAKVIMCSAMGQKSMVIEAIKAGAKDFIVKPFQEDGVIQAV
150388091	1.31814e+06	Alkaliphilus metalliredigens QYMF	_ response regulator receiver protein _	18	VMIVDDSSFLRNIISDILQQSGFEIVGQAGSKEEALEVYDKTNPDIVTMDIAMPGADGFECVKALFEKNQDLKIIMISSMQDEELLTKAEKMKISGFIQKPFEEEDLISVV
150390471	1.32052e+06	Alkaliphilus metalliredigens QYMF	_ response regulator receiver protein _	18	VLIVDDAAFMRMMVKDVLTKNGYEVVGEAENGLKAVEKFKELDPTLTIMDITMPEMDGIQAVKEIKKIDPNAKVIMCSAMGQQSMVIEAIQAGAKDFIVKPFQADRVIQAVK
150390975	1.32102e+06	Alkaliphilus metalliredigens QYMF	_ response regulator receiver protein _	196	VLYVEDEEEVMKQMEFFLKKRVGKLITAQNGMEGLAAFKENLPDLIISDLKMPIMDGIAMTRKIREVSDVPVVITTAFSEQDMILKAIDIGIEKYIIKPIDARELTEV
150391046	1.3211e+06	Alkaliphilus metalliredigens QYMF	_ two component transcriptional regulator _	19	LLIIEDDKYILNFISLSLKTSGYAFETARTGLEGMSLFYSHHPDIILLDLGLPDIDGIDVIKSIRMISQVPILIVSARGQENEKIAALDEGADDYITKPFHMGELMARI
150390755	1.3208e+06	Alkaliphilus metalliredigens QYMF	_ two component transcriptional regulator _	1	VLLVEDDTLVAKIILYYLEQAETYEVIWAKTGSEAYANARDKFDVILLDILLPDVNGLDLCSRLTEWHDCPIIFISCLDCSDTIVQALERGGDDFIVKPFDNKILEARI
150390092	1.32014e+06	Alkaliphilus metalliredigens QYMF	_ two component transcriptional regulator _	1	LLVVDDEPLLVKGLRYSLEQDGYEILSASDGEEALDKFNKGSFDLIILDLMLPKIDGLEVCQTIRQTSQTPIIMLTAKGEDMTKILGLEYGADDYMTKPFNILELKARIK
150390626	1.32068e+06	Alkaliphilus metalliredigens QYMF	_ two component transcriptional regulator _	1	ILVVDDEEHIIELIKFNLEKNGFSVLTSDNGEESIELVKNNDVDLIVLDLMLPGIDGIEVCKRIRRMDDYDKTPIIMLTAMGEETDRILGLELGADDYMTKPFSIRELVARIK
150391442	1.32149e+06	Alkaliphilus metalliredigens QYMF	_ two component transcriptional regulator _	1	VLVVDDEREITDAIEVYLRNQNYNVFKAYDGAEALEIFEKEEIHLVLMDVMMPRLDGTSATIKIRENSTVPIIILSAKSEDVDKIWGLNVGADDYITKPFNPMELLARVN
150391007	1.32106e+06	Alkaliphilus metalliredigens QYMF	_ two component transcriptional regulator _	1	VLIIEDEKNIADVIKAYLQNEKYEAIVTHNGKEAISIFQQQSFDFVILDLMLPDLSGEEICKRIRLQSQVPILMLTAKVEESDRIYGLDIGADDYMTKPFSPKELVARVR
150389477	1.31953e+06	Alkaliphilus metalliredigens QYMF	_ two component transcriptional regulator _	1	ILIIDDEEDILKLLSTVLKREGLDDIYTAGDANSGYALFEKEDPDIILLDIMLPDGDGYEICKRIRAISNVPILFISAKTEEIDRVLGFALGGDDYITKPFSPKEVAYR
150388920	1.31897e+06	Alkaliphilus metalliredigens QYMF	_ two component transcriptional regulator _	1	VLIVEDEKNIADVIKAYLEKEKYEAIVTHNGKEAIDIFQQQSFDFVILDLMLPGLSGEEICNRIRLQSDVPILMLTAKVEETDQIHGLDIGADDYMTKPFSPKELMARVR
150392434	1.32248e+06	Alkaliphilus metalliredigens QYMF	_ two component transcriptional regulator _	1	ILIVEDEKPIADILKFNLEKEGYRIEMAHDGEDALKKVSEFIPDLVLLDVMLPKLDGFQVCRKIRESFSMPILMLTAKEEEVDKVLGLEIGADDYITKPFGMRELLARVN
150388130	1.31818e+06	Alkaliphilus metalliredigens QYMF	_ two component transcriptional regulator _	1	ILIIEDEDPIRELIKLNLVMAGYETLEACDGEEGLQYLNNEKIDLVLLDVMLPQQDGYTLLPKILKKNIPTIMLTAKDRLKDKVKGLEMGADDYVTKPFEAMELLARVK
150390837	1.32089e+06	Alkaliphilus metalliredigens QYMF	_ two component transcriptional regulator _	1	LLVVDDEKNIVELIRMNLTRSGFEIIPCYNGLDAIEITLTQNPDLILLDLMLPDIDGLEVCRRIRLDERIHQTPIIMLTAKSEETDKVIGLGLGADDYITKPFGLRELEARV
150389552	1.3196e+06	Alkaliphilus metalliredigens QYMF	_ two component transcriptional regulator _	1	ILVVDDDEDIREIITLYLEKEGYQVILAMDGHQALECAFSFNPDLVILDMMIPGLDGIEVCQALRKNLSTPIIFLSCKSTPSDKSIGLIAGGDDYMSKPFDTMELLARIK
150388491	1.31854e+06	Alkaliphilus metalliredigens QYMF	_ two component transcriptional regulator _	1	ILILEDDISIAELQRDYLEINQFDVDIEARGDEGLQRALNHDYDLIILDIMLPGKDGFEICKEIRLTKNTPILLVSAKKEDIDKVRGLGLGADDYMTKPFSPNELVARVR
150388543	1.31859e+06	Alkaliphilus metalliredigens QYMF	_ two component transcriptional regulator _	1	VLIIDDEKLLVKGLRKSFEQEGFDVSVAYDGEEALRVFESGSFDFIILDLMLPKIDGITLCNRIRQQSDVFIIMLTAKDGDIDKILGLELGADDYMTKPFNTRELIARM
150389766	1.31982e+06	Alkaliphilus metalliredigens QYMF	_ two component transcriptional regulator _	28	ILIIEDEIPLAEALSQMLKKNNYTVDLLHDGESGLDYALSDIYDLILLDIMLPKMDGLSILKEIRQEGIATPVILLTAKGEITDKVMGLDSGADDYLAKPFATEELLARI
150389353	1.3194e+06	Alkaliphilus metalliredigens QYMF	_ two component LuxR family transcriptional regulator _	2	VLIVDDQSLMRDGLKTIIDLEPDMEVLGTCENGRVAIEKSKILNPDVILMDIRMPEVNGVEATKIIKKHAPHMKIIILTTFDDDEYIIDALSHGASGYLLKDIDGDKLINSI
150391892	1.32194e+06	Alkaliphilus metalliredigens QYMF	_ two component LuxR family transcriptional regulator _	2	VLIVDDDALIRDSLKILIDLEADFTVVGTASNGQEAFEFCKEYAPDLILMDIRMPIMDGVLATKMIKESFGSIRIIILTTFKDDQYIKEALKNGAQGYILKSQSADSIIESL
150389373	1.31942e+06	Alkaliphilus metalliredigens QYMF	_ two component LuxR family transcriptional regulator _	2	ILLVDDHAIVRYGIRSLIERNDGLKVCGEAGTLQEAYHKVSDLKPDIVLLDIKLPDGDGAAGCREIKKRVPDVKVIILTAYAEDSIILEAVKAGAEGYLLKDIDSKNIITAI
150391445	1.32149e+06	Alkaliphilus metalliredigens QYMF	_ two component LuxR family transcriptional regulator _	2	ILIVDDDQLVCQSLQVLLSREQDMDVMATANNGAEAITCCRDILPDVVLMDIQMPVMDGIQATREIKKEWPQIRIMMLTTFQDEQNIRLAISAGAEGYLIKSTEVSSMAQQ
150389118	1.31917e+06	Alkaliphilus metalliredigens QYMF	_ response regulator receiver/unknown domain-containing protein _	30	VLIVEDDQMVAKLNKHYVESVQGFEVVGVANDGEKAWKFINHNNVDLIILDIHMAKVDGLAFLKEMRKKLIQADVIFVTAAQESETIDEGLKLGAVDYLIKPFEYERMKSAL
150390726	1.32078e+06	Alkaliphilus metalliredigens QYMF	_ response regulator receiver/unknown domain-containing protein _	30	VLIVEDDPMVLQLNKRYVESINGFKVVATATDGEKALELLKTNPIELIILDVYMPKLDGIGFLKEMRKRFFKADVILVTASKEAESIDDVFKLGAVDYLIKPFEYERLKSSL
150388768	1.31882e+06	Alkaliphilus metalliredigens QYMF	_ diguanylate cyclase and metal dependent phosphohydrolase _	33	ILIVEDSRMLALDIQEKLNHLGYTVIGTAATGEEAISYAQTQSPDLVLMDIFLKGEMDGIEAATKIQGQLKLPIIYLTSYSETKILDRIKATESYGYLVKPVKESVLHTNI
150391571	1.32162e+06	Alkaliphilus metalliredigens QYMF	_ response regulator receiver protein _	34	VMIAEDETLEQEFLKSIIADALHPEDFLLTCESGVEAIELSKKHRPNIIIMDLMLAELDGLSAIEEIRNFLPESCIAIISAYSDFSYAQRAIRLNVHEYLLKPIKPAKIKSIL
150388959	1.31901e+06	Alkaliphilus metalliredigens QYMF	_ response regulator receiver protein _	34	VLIADDEPKIRKGLKQWIEESSYKFQVVAEAKNGKEALEYTIKASPELFLVDINMPMMNGLDFISQMKKISPNSIVVIITGYDDFQYAHKAIKFNVFDYLLKPVSKNEFN
150391059	1.32111e+06	Alkaliphilus metalliredigens QYMF	_ response regulator receiver protein _	34	ILIVDDEPRTRQGLKKTIGIWSEGKYEIICAASAKEAIDVLEQQRVHLLITDICMPETSGLKMLEQLNMKKHKLVVIILSGFSEFDYAQQAIRLGVVNYLLKPINKHKLIESV
150390576	1.32063e+06	Alkaliphilus metalliredigens QYMF	_ response regulator receiver protein _	34	ILIADDEHIVIESLQFIIEKYIENVEIVGSAKSGREAIEKALITSPDIILMDIHMPGINGIEAIKQIKENNVDAMFVIITAYEYFQYAKEAVNLGVYEYLLKPLNKNKVIN
150389689	1.31974e+06	Alkaliphilus metalliredigens QYMF	_ two component transcriptional regulator _	361	ILVVEDEDILREVIMDYLIEEGYQVLEAADGEQALELFQSHSVDLVILDIVLPKIDGWSVCRRIRKNSNIPIIMLTARSDEDDSLLGYELGADDYLIKPYSPRVLMVKV
150390737	1.32079e+06	Alkaliphilus metalliredigens QYMF	_ two component sigma54 specific Fis family transcriptional regulator _	37	IVIIDDEETIRLSLKEALMDLGYEAETAGDSWEGLKRIALFKPQAVFLDMRLPDGNGLQLIQRIKEMDKDLEVVLMTAYGDIKTAVTAIKNGAFDYINKPFELDEV
150390890	1.32094e+06	Alkaliphilus metalliredigens QYMF	_ two component LuxR family transcriptional regulator _	3	ILLVDDHSLMRQGLKQIIELEKDMEVIGQAGDGEEALEKVKQVCPDVILLDINMPKLNGIQVLRRLKDMDKTTKVIMLTFHEDREYLFETINLGANGYVLKDAESDSLIKAIR
150388326	1.31838e+06	Alkaliphilus metalliredigens QYMF	_ two component LuxR family transcriptional regulator _	3	ILIVDDHPLVRKGIASILFLEKDVHEIKEAENIEEAIDMMAKFSPEITLIDLNLGRQDGLEIVNKARAKGMATKFIVLTSSSKREDFLRAREAGVDGYILKEAFAEDILYA
150389266	1.31932e+06	Alkaliphilus metalliredigens QYMF	_ two component transcriptional regulator _	46	ILIIEDDDTISSIIKDNLEKWGYQTIKVLDFSNILANYTSFEPHLVLMDINLPYYDGFYWCAKIRELSNIPIVFISSRDTDGDKIRAIAQGGDDYIEKPFSMDLLIAKI
150391654	1.3217e+06	Alkaliphilus metalliredigens QYMF	_ two component transcriptional regulator _	46	IFIIEDDSLLLEALKEGLSQWSYEVSNPSDFSHIMEAFVEHHPHLVIIDIQLPKFDGFHWCRAIRAVSKVPIIFLSSRDHPMDMVMAMNLGADDYVQKPFNMDVLLAKV
150391290	1.32134e+06	Alkaliphilus metalliredigens QYMF	_ two component transcriptional regulator _	46	IMIIEDDITIAESLSAYIEKYNYEVFIVRQLEKIMDEFNEYKPDLILLDVNLPIYDGFFWCREIRNISSLPIIFISARTGDLEQIYAMDNGADDYIVKPFVLDVVIAKI
150388095	1.31814e+06	Alkaliphilus metalliredigens QYMF	_ response regulator receiver/ANTAR domain-containing protein _	54	VVIADDEPITRMDIVEMLLEEGYDIVGEASDGFDAIELCKKHKPDLVLMDVKMPLLNGLKAAEVINQDELAACVVLVTAYSGREFVEEAKKAGAMGYVVKPINEKNLLPT
150389188	1.31924e+06	Alkaliphilus metalliredigens QYMF	_ LytTR family two component transcriptional regulator _	5	ILIVDDERPARLNLINSLKDYGQFQVVAEASNGEDAIGFCKENTVDIVFLDIQLQDMTGFDVANELMALHRVPKIIFATAYNQYAIEAFEYSAIDYLLKPIDDIRFKKT
150388454	1.3185e+06	Alkaliphilus metalliredigens QYMF	_ LytTR family two component transcriptional regulator _	5	IAICDDDTYHVESIKEFLCQLTKEHDTVIIEAYSGEELLDKAQNKSINIAFLDIDMAGMNGIEVGKEIRKMFPEAIIVFLTGYKHYALEAFNLESFQYIIKPITHSKF
150391295	1.32134e+06	Alkaliphilus metalliredigens QYMF	_ LytTR family two component transcriptional regulator _	5	VLIVEDNLEQLCFLKDILEESQEDITIFTATSVKQAYHLALSHNINLFFIDIGLPDGSGLELAKNLRAIQKYELTWVVFLTTYTQYILKAFKQIHCYDYIVKPYKKEDIIAI
150391532	1.32158e+06	Alkaliphilus metalliredigens QYMF	_ response regulator receiver/SARP domain-containing protein _	5	IVIDDEWYNLEETSELIDKTGYFHVAGRYQNPLKALEEAKLTNPQVAFIDIELPEMDGITLAEKLLEVNSAMIIVFITSYNQYAVQAFDLNAIDYILKPIKGERF
150390461	1.32051e+06	Alkaliphilus metalliredigens QYMF	_ response regulator receiver modulated CheB methylesterase _	6	VLVVDDSAFMRKMITDILNADPKITVVGSARNGSEVVKKILELKPDVVTLDIEMPICDGIEALRLIMEKCPLPVIMLSSLTSEGGEATISALELGAIDFIQKPTS
150390276	1.32033e+06	Alkaliphilus metalliredigens QYMF	_ response regulator receiver protein _	76	VLIADDNKDFCDILKEYLQRQADIEVVGIAKDGLEAVELIQEMTPDLVVLDIIMPHLDGLGVLERLNKLNLESFPKVIILSAVGQDKITQRAINLGADYYVIKPFDFEVFIERI
150391003	1.32105e+06	Alkaliphilus metalliredigens QYMF	_ two component sigma54 specific Fis family transcriptional regulator _	82	ILIVDDEKNMRWAMKKALKTEDYQVFEAANGQEGVEKFQELQPDLVLLDLKMPVMDGLEALQKMKGIDEHIPVIMITAHGTTESAVEAMKLGAIDYISKPFDIEELK
150388440	1.31849e+06	Alkaliphilus metalliredigens QYMF	_ response regulator receiver protein _	85	VLYVEDEPDTREEMTKFLKRRVGKLYVAKNGLEGIAAFDQNQPHIVVTDLKMPVMDGLEMIKAIRNREHQPAIIITSALSDSETILAAVDIGIVKYVVKPIHPKELM
150390494	1.32054e+06	Alkaliphilus metalliredigens QYMF	_ response regulator receiver protein _	85	VLYVEDEPITRNQVSKILKKSVGKLITAENGKEGIEKFFEYQPDIIITDLIMGDISGIEMMEKLRAEGIRCPFIITSAISDSQTILETVELKIEKYLIKPIDVGILIEN
158321811	1.51432e+06	Alkaliphilus oremlandii OhILAs	_ integral membrane sensor hybrid histidine kinase _	109	ILIVDDEFLNQRILLDIVRQLGFNGMVADSGKETLEILEREKVDLIILDLMLPDMSGDRVCSIIRQKYSMGELPILILTASGRAADLMNAFDYGANDFQRKPMDSEELKSRI
158320987	1.51349e+06	Alkaliphilus oremlandii OhILAs	_ response regulator receiver modulated CheW protein _	123	ILIAEDSEMLSRILVQALHEAGYSNLIVTDNGREAWDTLEKLRADRTRKLTDQVSCVITDIEMPKMDGHHLTKLIKTDEDLSKLPVIIFSSLISEDMKRKGESLGANAQISKPEIANLVDII
158320527	1.51303e+06	Alkaliphilus oremlandii OhILAs	_ response regulator receiver protein _	18	ILIVDDAAFMRMMIKDVLTKNGFEVLGEAENGAKAIEKYKELQPNLTIMDITMPEMDGIQAVKEIKKLDSNAKIIMCSAMGQQAMVIEAIQAGAKDFIVKPFQADRVIEAVK
158319660	1.51217e+06	Alkaliphilus oremlandii OhILAs	_ two component transcriptional regulator _	19	IMIVEDEEPISEFISIKLELQGYRTLKAYNGQEAMSLAASHCPDLILMDLGLPDKDGMEVLKFIRGWSLVPIIIISARHEEKFIVSALDNGADDYITKPFNNAILVARV
158319899	1.51241e+06	Alkaliphilus oremlandii OhILAs	_ two component transcriptional regulator _	19	ILIIEDDKYILNFISLSLKTNGYVFDTAKTGIQGMSLFYSNNPDVILLDLGLPDIDGIDIIKSIRMISEVPILIVSARGEEKEKISALDAGADDYITKPFHMGELLARI
158320425	1.51293e+06	Alkaliphilus oremlandii OhILAs	_ two component transcriptional regulator _	1	ILVVDDEEHILELIRFNLEKEGYDVLLCENGDECIPMIQNNKVDLVVLDLMLPGMDGIQICKKLNRMDEYENLPIIMLTAKSEETDRVLGLELGADDYITKPFSVRELIARIR
158321191	1.5137e+06	Alkaliphilus oremlandii OhILAs	_ two component transcriptional regulator _	1	ILVVDDEEDIVNVIKSYLEKEKYHVFTAYNGNEAIERFHQNSIDFVILDLMLPDLSGEEICKKIRIESQVPILMLTAKVDLTDRIYGLDIGADDYMIKPFSPKELVARVN
158321804	1.51431e+06	Alkaliphilus oremlandii OhILAs	_ two component transcriptional regulator _	1	ILIVEDEKPISDIVRFNLEKEGYKVLVAYDGEDGVNKALTLNPDLVLLDVMLPKLDGFQVCRKIRASSSVPILMLTAKEEEVDKVLGLEMGADDYITKPFGMRELLARVK
158319177	1.51168e+06	Alkaliphilus oremlandii OhILAs	_ two component transcriptional regulator _	1	ILIVEDDMDINNLLSKMLSKRGYHVRQAYSGTEALMCLEHYEFQLVLLDLMLPGMVGEEIICQIRKLKNMPIIVISAKLAQDTKIEVLNLGADDFIVKPFDVNEVLARV
158321721	1.51423e+06	Alkaliphilus oremlandii OhILAs	_ two component transcriptional regulator _	1	ILVVDDEKEITDAIEVYLKNQNYNVFKAYNGIEALEVFREEEIHLVLIDIMMPRLDGTKTTIKIRETSSVPIIFLSAKSEDMDKILGLNIGADDYITKPFNPMELLARVN
158320763	1.51327e+06	Alkaliphilus oremlandii OhILAs	_ two component transcriptional regulator _	1	ILIVDDEPLLVKGLKYSLEQDGYEILTAFDGEEALEKAKIANADLILLDLMLPKIDGLQVCQQIRLNSQTPIIMLTAKGEDMSKILGLEYGADDYLTKPFNILELKARIK
158319439	1.51195e+06	Alkaliphilus oremlandii OhILAs	_ two component transcriptional regulator _	1	ILIIDDEESIRKLVRRSLINENYLIEEASNGEEALERLRNNTFDLIILDVVLGDEDGFELIQEIKVLGIKTPIIFVSGRCEDHDQILGLGLGATNYITKPFSPAILCAHV
158320018	1.51253e+06	Alkaliphilus oremlandii OhILAs	_ two component transcriptional regulator _	1	IVIVEDDIFLRSELQNVLEKEGYAAECISSFHNVIEEIIHRNPDLILLDLNLPHMSGYEICKGLKAKGIGPILILTSRNQLRDEIHALDLGADDYLIKPCHPDRLLARI
158319282	1.51179e+06	Alkaliphilus oremlandii OhILAs	_ two component transcriptional regulator _	231	ILVVDDEKEIRDLIEIYLKNEGFQIIKASNGREALEILEEEEVHLIILDIMMPEMDGIKACMKIREEKNMPIIMLSAKAEDMDKIFGLTTGADDYVTKPFNPLELIARVK
158319716	1.51222e+06	Alkaliphilus oremlandii OhILAs	_ two component transcriptional regulator _	27	IFLVEDEKLLVDLLTSYIMEAGYCIKSFHNGLDAKNSILEKPDLWVLDIMLPGMDGYALIKEIKSKTPDVPVIFMSARNAELDRVVGLEMGGDDYLPKPFLPRELVLRI
158319827	1.51233e+06	Alkaliphilus oremlandii OhILAs	_ two component transcriptional regulator _	28	LLIIEDETDLVNALKKGFVKKGYAVDYAVDGEVGLELYHINEYDLIILDLNLPSMDGLEVLETIREKDKMQRVLILSARSTVPDRIRGLDMGANDYLPKPFDFAELDARV
158321428	1.51394e+06	Alkaliphilus oremlandii OhILAs	_ two component AraC family transcriptional regulator _	34	VLIVEDEILEQEFLKTMVLGELSPEDKVLTTESGIQAVQLAKQHRPNIIIMDLMIAEVDGLTAIQDIRKFLPNACITILSAYSDFSYAQKAINLKVFEYLLKPVKPSAFKE
158321493	1.514e+06	Alkaliphilus oremlandii OhILAs	_ two component AraC family transcriptional regulator _	34	VMIVDDMEIIRRQIKRLPLWGEETGFHIVEEAEDGKDALDKLQKQSVDLLITDIKMPRIDGVELLKEVDEHQLARCVVFLSEHSEFSFAKEAIQYGIFDYLVKPVQREELQKL
158319235	1.51174e+06	Alkaliphilus oremlandii OhILAs	_ two component AraC family transcriptional regulator _	34	VLIADDEPKIRKGLKKILQSFNLDIEIVAEAEDGEIALNLAQEHKPNIILVDINMPFLNGLGFIEKIRDFLPNTMIIIITGYDEFYYAKKAIQLQVFEYLLKPVNATELKE
158320230	1.51274e+06	Alkaliphilus oremlandii OhILAs	_ two component LuxR family transcriptional regulator _	3	VLIADDHALVRQGLKQIIELEPDIKVIGLAADGEEAVLKTQQLSPDVVLLDISMPKQNGIQTLRRLKDMDSTIKIIMLTFHEDREYLFETINLGANGYVLKDAESESLIKAIR
158321109	1.51362e+06	Alkaliphilus oremlandii OhILAs	_ two component transcriptional regulator _	46	ILIVEDDGIIAKAIKNHLETWGWQAQWVADFKDVLAAFVSYDPQLVLMDISLPFYNGYHWCSEIRKVSKVPIIFISSTSDNMNIVMAMNMGGDDFIIKPFDLNVLTAKV
158319790	1.5123e+06	Alkaliphilus oremlandii OhILAs	_ two component, sigma54 specific, Fis family transcriptional regulator _	4	ILIVDDESEFRDFYELILGDKGYEVYTAFSGEDCLQMVEKNPVDLVITDLKMTGIDGIQLLEKLKDTVPECAVIIITGYGTVETAVEAIRKGAFGYFIKGHNPEELIIEI
158321845	1.51435e+06	Alkaliphilus oremlandii OhILAs	_ two component, sigma54 specific, Fis family transcriptional regulator _	4	ILIVDDEREYRETYRMILESRGFSVGEAETGVKALEKLEEEYYPIVLCDVIMPGIDGLEVLKKIKETYDKSVEVIMVTGYGGVETAVQAMRMGAFGFFVKSHNPEALLI
158319257	1.51176e+06	Alkaliphilus oremlandii OhILAs	_ two component, sigma54 specific, Fis family transcriptional regulator _	4	VLLVDDEEKFIELLKQRLTRKGYSVEISNCSLKALNMIEETEFDVALFDIMMNGMDGLALLEKAKKIQPNLEIIMLTGYATVDTAIEAMKKGAYDYLTKPIKPIELE
158319477	1.51198e+06	Alkaliphilus oremlandii OhILAs	_ LytTR family two component transcriptional regulator _	5	ICDDDSVHVDLIKSYIESMNIPCKVDYILAYSGEELLEQLNKNIVDIVFLDIEMKTLNGIETGKKIREFTEDTIIVYLTGYRHYAVEAFEIESFHYLIKPIMETKFVK
158319100	1.51161e+06	Alkaliphilus oremlandii OhILAs	_ LytTR family two component transcriptional regulator _	5	LCDDNQVQLNYIQTLIFSWMNLKNIQCHISTYISAEEFIFEHPDTYPFDLLILDIQMGNMNGMELAKNIRATDANIMIIFLTGLEEYVYEGYEVGALRYLLKPINEQQLMVL
158320369	1.51288e+06	Alkaliphilus oremlandii OhILAs	_ LytTR family two component transcriptional regulator _	5	VIIDDEYLSIEELSFLLSKIHFIEIVGKAECGLDGLDLIRNLKPDLAFVDVKMPDISGIQLVKKINELDIHCKIIFTTAYDKYAIEAFNVDAIDYILKPYEEKRVIKS
158321810	1.51432e+06	Alkaliphilus oremlandii OhILAs	_ response regulator receiver/SARP domain-containing protein _	5	ILVDDEPIALEVLKHKVAFYEDIEIVGSYTDPLEALKEVKIVQPDAVFLDIEMGGGINGLELANVFIKEVGSLEIVFITAYSQYAVDAFEINAIDYLLKPIQENRLSKAI
158321125	1.51363e+06	Alkaliphilus oremlandii OhILAs	_ response regulator receiver modulated serine phosphatase _	63	VLAINIKEFLRNCGYEVVQNLDKTTYMDDIRKEKPHVILINCTQNTEFEIEVCKRLKKEDRTNKIPLIAILDQQSIEARKKYLALGIEDYIDVPFEKEELNLKV
158320537	1.51304e+06	Alkaliphilus oremlandii OhILAs	_ response regulator receiver modulated CheB methylesterase _	6	VLLVDDSAFMRKILTDIVNSTDTIEVIGVAKNGAEAINQVRSLNPDVVTMDIEMPILNGIEALKRIMKDQPVPVIMLSSLTSDGADTTLTCLDIGAVDFIQKPSS
158320634	1.51314e+06	Alkaliphilus oremlandii OhILAs	_ sporulation transcriptional activator Spo0A _	76	ILIVDDNKDFCDILTEYLDRQQDIEIVGVANNGKEAVELIPQKLPDLIILDIIMPHLDGLGVLEKINCMNLTKYPRVIIMSAVGQDKITQRAISLGADYYVIKPFDFEIFIERI
158320115	1.51262e+06	Alkaliphilus oremlandii OhILAs	_ two component, sigma54 specific, Fis family transcriptional regulator _	82	ILIIDDEKNMRWAIKKALEKEGYNIYEAENGQDGLEKLEEIYPDLILLDLRMPVMDGMEALQRIKEINQDIPVIMLTAHGTMESAVEAMKLGALDYISKPFDIEELKVL
196157205	2.12669e+06	Alteromonas macleodii 'Deep ecotype'	_ putative sensor protein _	0	LLIVDDNLINREVAKGVLESLPGKMFTCCDGEEVIAFLQKCEKKGRRIHSILMDCQMPNMDGYETTRAIREGKAGPLHANVPIIAMTANAMLGEKEKCLEAGMDDFTTKPVIADVLIPK
196156388	2.12588e+06	Alteromonas macleodii 'Deep ecotype'	_ Response regulator receiver:ATP-binding region, ATPase-like protein _	0	ILLVEDNNINQLVTGEMLTNLGLTFDIAEDGKQAVQKLENAPQYDLVLMDVQMPVMDGYEATRQLRERGFTDVPIIGLSANAMKEDRQSAMDAGMNDYLTKPIKQKSLIGML
196155766	2.12526e+06	Alteromonas macleodii 'Deep ecotype'	_ Signal transduction histidine kinase _	0	LVVEDNEINQLVIKEQLREVGLPSEVAVNGVEAVDKVKHSLAEKTPYAMIFMDCHMPVMGGLEATQKIRALGKQTKDVPIIALTANVLTGDKEKCLKSGMNDFIPKPVGVSRLKE
196158225	2.12771e+06	Alteromonas macleodii 'Deep ecotype'	_ PAS signal transduction protein _	0	VLVVDDDLISVEISQQILKDLGVNVVTAMTGELALALCKSNTFDAILLDCHLPGITGYDIAETLTHKEGCYTPIIALSADETNEASEKALSAGMCHHLVKPATADEIVHTI
196156564	2.12605e+06	Alteromonas macleodii 'Deep ecotype'	_ putative two-component member protein _	0	ILVVDDVQQNIELLSLLLKRSGHKVETATDGLIALKKMRAQSFDVVLMDLQMPNLDGLEAAKQRRLYEKDQGLPATPIIALTASVLVQDKYEAEQAGMEGFANKPVDFSLLMEEI
196157305	2.12679e+06	Alteromonas macleodii 'Deep ecotype'	_ Signal transduction histidine kinase _	0	ILVVDDNDINRLVLASMLERFNYVPDEADNGEVAVEMARAKRYDLIFMDCAMPVLDGMSATKIIMQEGLLSKYGRVVAVTANTTAEDKISCSEAGMADFLSKPVVQNDVTAQV
196155718	YP	Alteromonas macleodii 'Deep ecotype'	_002125207.1_ sensory box histidine kinase/response regulator _	0	ILFAEDNALNQKVTLGLLSDTHATIEVANNGLEAISILRKDSAFDVVLMDIQMPVMDGLTAAKHIREELKLTLPIIATTAHAMQQDIDKSLAAGMDGHINKPVDPNRFFD
196157965	2.12745e+06	Alteromonas macleodii 'Deep ecotype'	_ multi-sensor hybrid histidine kinase _	0	VLIVEDNDINQVIAKQHLSNHTTLSAKSGVEALQALNKMKVTFDVILMDCQMPEMDGFEATKRIRNGEAGSRYLNVPIIALTANAMKGDKERCVSAGMDDYLSKPFDAEDLTDKV
196155994	YP	Alteromonas macleodii 'Deep ecotype'	_002125483.1_ GGDEF domain-containing protein _	0	VLLVEDNAINQLVATTILEGEGLTVDVANNGKEALAFLQQPQQAKPYSLVVMDCQMPEMDGFETTKHIRSGAAGAHYQSIPIVAITANAMQSDKDKCLQSGMNDFLTKPIDQEKVILTL
196157477	2.12697e+06	Alteromonas macleodii 'Deep ecotype'	_ multi-sensor hybrid histidine kinase _	0	VLLAEDNDINVEVIKALLEEFSLDLHHVSNGQEAINAVANNQFDLVLMDVQMPEVDGLSATRHIRQTLKMHTPSIALTANAMQHDIDECLAAGMNAHVGKPVDKAHLVDTL
196156046	YP	Alteromonas macleodii 'Deep ecotype'	_002125535.1_ two-component hybrid sensor and regulator _	0	ILLAEDNEINAEIVKTIMQAEGYKFLHVKNGKDAIDVVKRHNFDLILMDCNMPIMGGIEASSILRNALDITTPIVALTANAFAEDKEECLAAGMTDFMAKPIDKGTLLS
196158632	2.12812e+06	Alteromonas macleodii 'Deep ecotype'	_ Signal transduction histidine kinase _	0	VLLAEDNAINAVVAQALLEQLQCDVEHVDNGLKATARVEEGGIDVVFMDVHMPVMDGIEATKRIRKLDGTLGQIPVIGLTAEAFKERHIAFKEAGMDDIVTKPVTIEALQES
196156092	YP	Alteromonas macleodii 'Deep ecotype'	_002125581.1_ putative two-component sensor histidine kinase and response regulator hybrid _	0	VLIVDDLREIRRLTGHLVSQSQADISYAENGVKALEAVLEADEHNQPFDLVLMDIHMPVMNGIEALHAIRRHGQDIPVIAVTAASRKGLRESLIREGFNDVIGKPIDRFALAN
196155395	2.12488e+06	Alteromonas macleodii 'Deep ecotype'	_ putative signal transduction histidine kinase two-component system protein _	0	VLLAEDNDINAEIAMDMLKTANIKCIRTKNGLDTINAEKKYDFDVILMDCQMPVMDGYAATTLIRKEGKNKDAIIIALTANVFAEDKNACLAAGMNAHLSKPLSKQALFD
196158004	2.12749e+06	Alteromonas macleodii 'Deep ecotype'	_ histidine kinase response regulator hybrid protein _	0	VLVVEDHYINQVVIQTLLEKLGVAHAIVSTGEEGVKYVNANPVDLVLMDLNLPGIQGDEATAQIKSMKPELPVIALTADAITKPASLYEKGLDDVLTKPVDSNELVRVL
196155313	2.1248e+06	Alteromonas macleodii 'Deep ecotype'	_ sensor protein BarA _	0	VLAVDDMEMNLKLLHTWLDHSPIELITTINGQDAVNQCQIQEFDLILMDVQMPGMDGVQATREIRKSPLNMGTPIVAVTAHAFKEEQDRLLASGMDDYLPKPIEVDLLITLI
196155208	2.1247e+06	Alteromonas macleodii 'Deep ecotype'	_ transcriptional regulator _	10	LEKLGYSVDTAGTGSEGLSMALLGSYEIIILDMMLPELDGMTILKTLRKRHLETKVIILSARSESEDKVAGLLAGADDYLSKPFSFDELTARL
196155138	2.12463e+06	Alteromonas macleodii 'Deep ecotype'	_ putative two component response regulator transcription regulator protein _	10	ILVVEDEVKTGDYIKQGLIESGFVVELVRTGLDGHHKSMIGDYELIVLDVMLPDIEGWKILSSLRESGKFTPVLFLTARDHVNDRVKGLELGADDYLVKPFAFAELLARVR
196157692	2.12718e+06	Alteromonas macleodii 'Deep ecotype'	_ flagellar regulatory protein C _	119	ILIVEDDAGLREALLDTLLLGNYNVVEADCAEQALMMLSMQAIDLVVSDIQMGEMSGLTLLKSIKAKYPNMPVLLMTAYATVNDAVQAMRDGATDYLSKPFAPEVLLNL
196158742	2.12823e+06	Alteromonas macleodii 'Deep ecotype'	_ osmolarity response regulator _	11	ILVVDDDMRLRSLLERYLLEQGYQVRSAANAEQMDRLLERENFHLMVLDLMLPGEDGLSICRRLRQQENDMPIIMLTAKGDEVDRIIGLEMGADDYLPKPFNPRELLARA
196158354	2.12784e+06	Alteromonas macleodii 'Deep ecotype'	_ two component transcriptional regulator, winged helix family _	120	IALVEDDAAIRENYIMALKAQGYSVNAYEDRPSAAEAFNHTLPDLAIIDIGLKDEIEGGFMLCQQLRGLSQTLPIIFFTARDNDVDTISGLRMGADDYLTKDISMAHLLARI
196158237	2.12773e+06	Alteromonas macleodii 'Deep ecotype'	_ putative DNA-binding response regulator PhoB _	12	VLVVEDEAPIREMLKFVLEQSGFNIIEAEDYDIAQEKICEPYPDLILLDWMLPGGSGVQLAKSLKQHEFTRDIPVIMLTARGEEEDKIRGLDAGADDYVTKPFSPKELVARIK
196156096	2.12559e+06	Alteromonas macleodii 'Deep ecotype'	_ putative sigma-54 interacting response regulator protein _	130	VLLVDDDAEFTEVACTIIEFLGHEVLTAGTLKEARDWLEKETFDHVLLDFMLPDGSGAHLFNELDALPKRPRVTLITGHPSVKSVIKGLCGPTVDYLVKPIQREEIEA
196156523	2.12601e+06	Alteromonas macleodii 'Deep ecotype'	_ chemotaxis protein CheY/response regulator receiver domain-containing protein _	136	TALELLKFIKEDEAFKSIPFMLVSSENRLSKLEEFKQAGVAAILPKPFEPLHLSRAL
196158181	2.12767e+06	Alteromonas macleodii 'Deep ecotype'	_ response regulator _	13	ILLVEDDRPLSDALALSLKNANYAVDCVYTGADAMTTLSIGQTDIVVLDLGLPDTDGLNVLKSIRKKNATLPVLILTARDKVSDKISGLDAGADDYLPKPFEIDELLARL
196156093	2.12558e+06	Alteromonas macleodii 'Deep ecotype'	_ putative two-component response regulator _	14	ILMADDDEDDRLLTVDALAESRVLNNLFCVEDGVELLEFLRHEGKYTDPASAPRPSLILLDLNMPRKDGREALQELKNDPKLRSIPVVILTTSKEEEDMLRGYDLGCASYITKPVNFEGLVE
196158293	2.12778e+06	Alteromonas macleodii 'Deep ecotype'	_ response regulator _	15	VLFVDDEPNILRAIKRALFTMDITLLLADSGAKALELMSANEVHVVISDMKMPQMSGAELLEQVAINYPETFRVVLTGYADIESTIKAVNQGKIHRYLQKPWDNQELISVV
196158042	2.12753e+06	Alteromonas macleodii 'Deep ecotype'	_ chemotaxis protein CheY _	163	VMIVDDASTVRMFHKMLVSSRDRIIEEAENGVEALEKAIGTQVDLFLVDVNMPKMDGYRLCKEIRRNEALRAVPIIMISTESANQDAERAYQCGANYYMTKPVEADMLKSV
196155716	2.12521e+06	Alteromonas macleodii 'Deep ecotype'	_ ATP-binding protein _	167	VMFVDDNADLIDAYCLLAESMGVTALGITSPTEAVEKFKAFKPNCVFLDIGMPDIDGYELVKMLKALPEADSVKFYSQSGWGSGKYIEDSKSAGFDKHFVKPLSKETIRS
196155249	2.12474e+06	Alteromonas macleodii 'Deep ecotype'	_ putative two-component system sensor kinase/response regulator fusion protein _	172	LLIVDDSREFRSYLFELFSPKYRCLVARNGTQALDVMQHYLVDVVITDQMMHEMDGLSLTKAIRSNASYANIPILMLTAKTGAELEKSALEEKVDYFLAKPASNEEIMLRV
196158290	2.12778e+06	Alteromonas macleodii 'Deep ecotype'	_ response regulator _	1	ILIVDDEMPVAKSIQRVARRAGFDSFIATGGFQAGIMLSQYEPKVMTLDLSMPGMDGYSVIEFTRDQSKYKDLKIVVISALDDISLQRALEIGADATLQKPFSNHDLTSTL
196157098	2.12659e+06	Alteromonas macleodii 'Deep ecotype'	_ response regulator in two-component regulatory system with PhoQ _	20	ILVAEDDSRLLTQLDALLQQNGYSVDLADNGEHALFLIKEYDYDLAIVDIGMPKLDGFEVIRKARQADISCPILILTARDRWQEKVEGLDAGADDYLTKPFHNEELLAR
196155533	2.12502e+06	Alteromonas macleodii 'Deep ecotype'	_ putative regulator in two-component regulatory system _	21	LLIADDHPLYRDALRGALSLSLPALTLKEAGDLTTTVDILNNEDIDLLLLDLHMPGSNDLFGLLHIRKLFPELPVAVVSGTEDTTLISKIISVGALGFIPKTASAQDIANAV
196156960	2.12645e+06	Alteromonas macleodii 'Deep ecotype'	_ putative regulator in two-component regulatory system _	21	ILVADDHPLFREALSGALEPYFENAQIIQAGSLDDALEKLNEFDGVELVLLDLNMPGGEYFNGLITLREQYPNIPIGVVSGSDTVEVVAQVMSLGAQGFIPKVSETREIAQAI
196157061	2.12655e+06	Alteromonas macleodii 'Deep ecotype'	_ Response regulator, LuxR family _CheY, HTH domains_ _	21	ILIADDHPLFRAAMCHALTSVEHLELVETSTFPDTLSYLEDFQDIDLLFLDLTMPGNEGLNGLAQVHALYPDVLVIVITAQEEADVMAKSFALGASGFIPKSASVECIIDAVN
196156146	2.12564e+06	Alteromonas macleodii 'Deep ecotype'	_ chemotaxis protein CheV _	22	VLIVDDSSTARKQIRDTLEQLGVTIIERKNGAEALSLLKKWADEGINPTDEILLMFTDAEMPEMDGYRLTSEVRNDPRMADLFIALNTSLSGSFNDAMVEKVGCNRFISKFQPDMLVD
196157731	2.12722e+06	Alteromonas macleodii 'Deep ecotype'	_ chemotaxis protein _	22	IFIADDSSVARNQVKKALTSLGLEIELAKNGLEALKRLKEIAEEYGDVTNRVGVLVSDIEMPEMDGYTLTAEIKNTPELQKLHVVLHTSLSGVFNQAMVQKVGADDFIAKFHPDELATAV
196158038	2.12753e+06	Alteromonas macleodii 'Deep ecotype'	_ Response regulator receiver domain-containing protein _CheY_ _	23	IHLVDDSATMLMSMEMLLKRAGYTVTKSESAEAAMAALESISPKLIITDLNMPGMNGIELIKTLKQQSKFRFTPMLMLTTESQQSRREEAKAAGATGWLVKPVEPEQLLGV
196155234	2.12472e+06	Alteromonas macleodii 'Deep ecotype'	_ chemotaxis protein CheY _	23	ILVVDDSVSIRQMVEMTLKGAGYTVTTAQDGQEAFDKCKSQQFNFVLTDQNMPRMDGLTLIKNLRGLGAYSRTPIVMLTTEAGGDMKAKGKAAGATGWMVKPFDPNKLLD
196155540	2.12503e+06	Alteromonas macleodii 'Deep ecotype'	_ hypothetical protein MADE_00719 _	24	VLCVDDQKENLDAMKTLLQKWGINVALANNWDDALTLCKTIQPQILLMDYQLSHDSEKNGLALIEEIRHRLNIVVPAALITATPDESLVTQCKAQGVNFLAKPLKPAKLRALL
196157060	2.12655e+06	Alteromonas macleodii 'Deep ecotype'	_ two-component sensor histidine kinase _	24	LLVENDEQVANAMCALLADWGANTTLITSGTEAHNVSHQHFDVLIADYHLNYGENGFDVAAILSEENVSFALKILVTANRSNEIREKAAASQFSYLPKPLKPAALKR
196155698	2.12519e+06	Alteromonas macleodii 'Deep ecotype'	_ two-component hybrid sensor and regulator _	261	ILVIDNEPHQQQLLKDVLTPLGFIVLLAENEKKTFSQLESHHIDLITLDVKLSNASGWDLLSTLRMDNWLMPVLMVSANARELEQYTAHTKLHNGYISKPFNLDNLFNQI
196158136	2.12763e+06	Alteromonas macleodii 'Deep ecotype'	_ Response regulator consisting of a CheY-like receiver domain and a winged-helix DNA-binding domain _	28	VLLVEDDPKVASHIANGLLGEGHECITVGDGASGFNEASSNELDAVILDVMLPELDGFSVLEKLREEGNTTPVLLLSAKSQVEDKVKGLRTGANDYLTKPFAFEELLARV
196156397	2.12589e+06	Alteromonas macleodii 'Deep ecotype'	_ two-component system, response regulator _	29	IVDDDSSIRWVLQKALQAADISCLSFENPEDLLLQLQSGQAPEVIISDIRMPQMDGMALLNEVHASHPMLPVIIMTAHSDLDSAVNAYQKGAFEYLPKPFDIDEAVT
196158162	2.12765e+06	Alteromonas macleodii 'Deep ecotype'	_ DNA-binding response regulator, LuxR family protein _	2	ILIVEDQSLVRDAIAMLLSLEDDLTVVDKYSNGQEAINYLNEHPAPDIILSDIEMPLVSGLDLAAHIANGSLSTKMVLMTTFSKPGYIKRALSLGVKGFILKESDSDYLIKAI
196158648	2.12814e+06	Alteromonas macleodii 'Deep ecotype'	_ transcriptional regulator NarL _	2	IMMVDDHPLLRKGLNQLIEFEDDLEVIGEASSGKEAIEMAVQLEPDLITLDLNMQGMDGLETLKHLRDKGVDSRIIMLTVSDNDEDVVEAVRSGADGYLLKDMDPEDIVDKL
196156092	2.12558e+06	Alteromonas macleodii 'Deep ecotype'	_ putative two-component sensor histidine kinase and response regulator hybrid _	304	ILLVEDDEDDYFLTSDYLAQCESPSFELTWVTNSLDAVEALKTNNFDLCLLDYLLGAENAIDVLGLLKSNQISLPVVILTGQSDSAVDEMVMRAGAADYLQKS
196155919	2.12541e+06	Alteromonas macleodii 'Deep ecotype'	_ sensory box/GGDEF family protein _	33	ILVVEDNLIEAMNVKNALTEADMEVLGIAKTESELYSLVEKRVPDLILMDIDLGGSNSGIEIAKNITERYKVPVVFSTSYCDDTTISNALAISPYGYLVKPYGMLSLTTTI
196155099	2.12459e+06	Alteromonas macleodii 'Deep ecotype'	_ two-component response regulator _	38	VLIVEDEVVTRTTLKSLFEAEGYNVFEAENGDQMHDFFENHAINLVIMDINLPGKNGLILAREVRDRKNVGLIFLTGRDNDVDRILGLEIGADDYLTKPFNPRELTI
196156330	2.12582e+06	Alteromonas macleodii 'Deep ecotype'	_ DNA-binding response regulator, LuxR family protein _	3	ILIVDDHAVVREGYKALLNAMMPDCRIFDAENGAQTHRLLASSDIEILILDINLSNESGLVLAKIFLKRHPDLKIIFFSMFEA
196156314	2.1258e+06	Alteromonas macleodii 'Deep ecotype'	_ response regulator _activator_ in two-component regulatory system wtih UhpB, regulates uhpT expression _LuxR/UhpA family_ protein _	3	ILIIDDHEIVRDGIKALIEQEYGWHVVYAVDSIGALPSYASFDEVDVAILDISLVNESGFDTLVKIKQQAPFVKCLMLSMYEHVGYISKALELGADGYVTKNAATKELMNSL
196155918	2.12541e+06	Alteromonas macleodii 'Deep ecotype'	_ bacteriophytochrome protein _	40	FIVEDNLLISLDLKKHLKQLGIDKIDIFGDINSARAALAKVKPSMMFLDVHLGNENTFQLGIEIQKLSIPFLFITGYGAAIELPDELSEVDILTKPVDTTLLK
196158278	2.12777e+06	Alteromonas macleodii 'Deep ecotype'	_ Multi-sensor Signal transduction Histidine Kinase _	49	ILVAEDEQDARDFIKLFLESNGARVNVVKNGLLAWKELNDIPEAFDLLLSDIGMPELDGLGLVLKMRASQNPEIAKLNAVALTAYAYTSDRVKALKAGFSNYVSKPVDGEELLTIL
196155718	2.12521e+06	Alteromonas macleodii 'Deep ecotype'	_ sensory box histidine kinase/response regulator _	52	VLIADDIEASRDAISEALSMANIQADIATGGKDAVVKMRSALATSTPYDVLILDWSMPDIDGLEVTAIMNQEFSIKQPKVIMLYAFESPRMREQANQLGIRNFIKKPFSTSELVDKL
196156532	2.12602e+06	Alteromonas macleodii 'Deep ecotype'	_ two-component system response regulator _	56	LLLVDDDKSLLRLLTIRLEGEGYDVTAVEDGQSALRKLQNDSFDVVLSDLRMPGLDGLSLFEEIMGIRKDIPVILMTAHGTIADAVAATQRGVFGFLPKPVDHDELRTLL
196156727	2.12622e+06	Alteromonas macleodii 'Deep ecotype'	_ putative response regulator in two-component regulatory system _	5	IVVDDEPLARKGLRARLERHDDVQVLAECQNGLEAVSSISQHRPDLVFLDIQMPGLNGFQVIHKLRELKQPIPMIVFVTAYDSYAIKAFDVHALDYLLKPADDERLGAAL
196157899	2.12739e+06	Alteromonas macleodii 'Deep ecotype'	_ response regulator _	61	VLVCDDSLVARKQVAKCLPQDWEVAVHFAKHGQEALTALAEGKGDLLLLDLNMPVLDGYGTLEAIQKQGLKTKVIVVSGDIQPEAHDRVTSLGALDFIRKPVDPKKLAEVL
196156273	2.12576e+06	Alteromonas macleodii 'Deep ecotype'	_ response regulator _	61	VLVADDSKLSRRSVIRALPEDLEYNITEATNGQEAIDALSESNFALVLLDLTMPEVDGVGVLEFLHEKTDAPNVIVISADFQPEKQKIVLSLGAKRFLRKPLDKEELAM
196158502	2.12799e+06	Alteromonas macleodii 'Deep ecotype'	_ response regulator _	61	DVDISFAENGEQALTLIREGKGDVVFLDLNMPVMDGYQTMEEIRKHDLPCLVIVVSGDVQAQAREKMLALGALDFIRKPIDNDKLSHI
196158134	2.12762e+06	Alteromonas macleodii 'Deep ecotype'	_ putative response regulator with chemotaxis-specific methylesterase domain _	61	ILICDDSALARKMARSNLPTGFAETIYEVSNGMDALEVLAHHTIDLVLLDLTMPILGGISVLSEIKHRQLETFVIVVSGDIQPMMQEKVMSLGALGFIEKPIKQDELKAL
196155994	2.12548e+06	Alteromonas macleodii 'Deep ecotype'	_ GGDEF domain-containing protein _	64	LIVDSNVSNREVLKRQLNVWGVETSVADSSKGALAHCKASLKSSSPITLVIIDNKMPDMCGKDFAMALFEEPRFADIRIVVMTELQDIESAQHFRTRGIASIFPKPLTTENLRHIL
196157372	2.12686e+06	Alteromonas macleodii 'Deep ecotype'	_ response regulator _	69	VLIVDDEPEVHAVTKLALNDFSLNGKTLEFVSAYSGEEAKAIFKAHNDIAVVLLDVVMEADDAGLQVADYIRNELDNHFTRIILRTGQPGQAPEKDVIINYDINDYKSKT
196158382	2.12787e+06	Alteromonas macleodii 'Deep ecotype'	_ response regulator/GGDEF/EAL domain-containing protein _	69	ILIVDDDEEIHTVTRLALSDLVVNDRKLNFIHAYSAKQAKALLHEYSNSIAIILLDVVMETDDAGFDVVKYIREDMKLFEPRIILRTGQPGYAPEEQVIKVYDINDY
196155238	2.12473e+06	Alteromonas macleodii 'Deep ecotype'	_ chemotaxis-specific methylesterase _	6	VLVVDDSALIRQILSEIIKSEPDMTLVGAAPDAFVAKKLVLEKSPDVITLDIEMPKVDGLRFLEVLMNAKPTPVVMISTLTEKGADATLRSLELGAIDFVAKP
196157667	2.12716e+06	Alteromonas macleodii 'Deep ecotype'	_ chemotaxis-specific methylesterase _	6	DDSTFYRRRVKEILDDDRELEVVGEARNGRDALEKAEALKPDVITMDVEMPVMDGISAVKAIMEKRPTPILMFSSLTHHGAQATLDALEAGALDFLPKKFED
196158045	2.12753e+06	Alteromonas macleodii 'Deep ecotype'	_ Two component CheB methylesterase _	6	VLIVDDSALMRKLFTELFEKEGFIVRVARNGEEALTKAVEFEPDCITLDINMPVMDGMTCLAMLKKLYTCPIIMVSSLTQKGATITLEALALGASDFVLKT
196158171	YP	Alteromonas macleodii 'Deep ecotype'	_002127660.1_ Response regulator containing a CheY-like receiver domain and a GGDEF domain _	77	VLVVEDSKTSRNHICSLLRKFQFQVHEANDGLEALEVLDNHRDIKMVIADHRMPNMDGYELVRTIRHEKRLQDLVFIGLSASGDSVLTSKFIKSGANDFLSKPFYHEEFY
196155022	2.12451e+06	Alteromonas macleodii 'Deep ecotype'	_ response regulator/GGDEF domain-containing protein _	77	VIVVSTNRVLRTKTVSLLQRHNFIAFECLTATDAMQCLSEHNNVRLVITDNTLPDMTGTHFVSSLRKAFSKEQLAIMGVAGGKGMLMSAHFIKSGANDFLRVPYCH
196155757	2.12525e+06	Alteromonas macleodii 'Deep ecotype'	_ transcriptional regulatory protein CpxR _	79	VLLVDDDVDLCALLSEFLEGDGFSVHAIHSGEEAVNTLLNSNQYDTVVLDIMMPGMSGLDVLRAVRAEKQTPILMLTGRGDDIDRIVGLEMGADDYLPKPCNPRELGARI
196157670	2.12716e+06	Alteromonas macleodii 'Deep ecotype'	_ chemotaxis protein CheY _	7	ILVVDDFSTMRRIIKNLLKDLGFSNIQEADDGSTALPMLQQGDFDFVVTDWNMPGMQGIDLLRAIRADDKLKHLPVLMVTAEAKKEQIVAAAQAGVNGYVVKPFTAATLKEKL
196156523	YP	Alteromonas macleodii 'Deep ecotype'	_002126012.1_ chemotaxis protein CheY/response regulator receiver domain-containing protein _	7	VLLVDDSKLARNHIRRVLEGMGLQRIREAENGAAALTLIKDEPFDLVVTDYNMPEMDGRELSEFIRFNPETTHIPIIMVTSEAADSAHMANIQQTGVNALCDKPFEPNEVRQML
196156998	2.12649e+06	Alteromonas macleodii 'Deep ecotype'	_ response regulator receiver protein _	7	LLIAEDQVLAKSHMHYALEQLGFKNMDYVDRPSQALSALKEYDYDAIICSYNLRSEQGGYYLLEQLNDAHSLPLTSAFIFTSADTSAEVVHAIIELQPDEFIAKPFSVNELDRR
196156744	2.12623e+06	Alteromonas macleodii 'Deep ecotype'	_ Response regulator with TPR repeat _	7	VLIVEDQRPFLLLLKGLMHSMGASDVVTKSSAEQAVSLCKKHKFDVIICDLHLGADNKSGYELIEELRTRRLINPTSIFILISADSARPIVLGSIERRPDDFLVKPFSQVQLKSRI
196156578	2.12607e+06	Alteromonas macleodii 'Deep ecotype'	_ response regulator receiver protein _	7	VLVIDNQGLVHDVVASALHEIGIKNVSSAFNAFHAKRLCEARQFDFVLLSFNVSHDKDGFHLFEELKHLNHINDTTTVVFLSAETSPELVNCIVELQPDDFWVKPLQRNKIESRL
196156713	2.1262e+06	Alteromonas macleodii 'Deep ecotype'	_ CheY-like receiver protein _	7	IAIVEDNATARTALRGHLMSIANLSVSSFASGVELKAALKKQNFELLLMDYHLGEGKSGVEWVQILRESGFIRPSTGIIFLTSDRSPQTIGRVMDLQPDVLLIKPYTIASLTRQV
196156402	2.12589e+06	Alteromonas macleodii 'Deep ecotype'	_ rteB, two-component system response regulator _	7	VAVVEDDPITLDLITDALETQLDATVYPFTRSKFARDFLLQQTTDSISLIISDQVMPDYDGLSLLKTCQAYGLDVPFLLITADPNKELVMEARKLQVTGFLAKPLNMDELIQK
196158171	2.12766e+06	Alteromonas macleodii 'Deep ecotype'	_ Response regulator containing a CheY-like receiver domain and a GGDEF domain _	84	VLVVEDSSTVRKIVNKLIEDNPHFTCDLCEDLAEAKSALESDNEYLAAIVDLNLPDAPNGESVELALSYNLPTIVLTGNFDEFTRAQLLDQGVLDYITKES
196156442	2.12593e+06	Alteromonas macleodii 'Deep ecotype'	_ aerobic respiration control sensor protein ArcB _	86	ILLVEDIELNVMVAKALLEKLGQKVDVAMTGQEAIDKARANQYDLILLDIQLPDMTGFDVASTLIEEDLVMQTPIVALTANVIKKRDEYLENGMDDVIAKPIKKSRVIE
196158226	2.12772e+06	Alteromonas macleodii 'Deep ecotype'	_ two-component system response regulator _hybrid family_ protein _	8	ILVVDDEPANIDILLGILGPFYDVKVAPSGAIALKITQQFTPDLILLDIMMPGMDGFEVCRQLKSDKLLSRIPVIFVTALSQGENEEKGFELGAVDYITKPVSPSIALAR
196157306	2.1268e+06	Alteromonas macleodii 'Deep ecotype'	_ putative response regulator _	8	VLIVDDEPMSRLLLESILESVFHCTVVESGKDAISNCEECLPDLVLLDMNMPDINGLEVCATLKASPTTSQIPVIFVTSTMDIESENACWEVGASDFVMKPVNASTLTHRVK
196155545	2.12503e+06	Alteromonas macleodii 'Deep ecotype'	_ putative response regulator _	8	VLIVDDQASSRLVLETLLEDTVPCTSVSSGQEAIEYCKFHTPDLILMDVSMPELDGHQTTALLRSKPLCAHIPIIFVTSSSTDEEETRCWDSGCVDFVVKPVNACTLRNRVK
196157308	2.1268e+06	Alteromonas macleodii 'Deep ecotype'	_ response regulator _	8	VVIIDDEPTTLLLLESAVESLAKVVTVSQSVQAFDSVKLHRPDLVVLDISMPEMSGFEVCKQIKVCPDTASIPIIFVTSHSDIENERI
196156565	2.12605e+06	Alteromonas macleodii 'Deep ecotype'	_ Response regulator CheB _receptor modification enzyme, protein-glutamate methylesterase_ _	8	LLLVDDEPVNLRVLKQLLANDYQLIFARNGEEALKLAPSRQPNLILLDVMMPGLTGFEVCRQLKQQENTKQIPVIFVTALNDEQDETQGFDAGAVDYITKPISPAIVKARV
196155697	2.12519e+06	Alteromonas macleodii 'Deep ecotype'	_ two-component response regulator _	8	VLVVDDSPESLGMLNVALNTQGFTALVALNGVQALAIVEKVKPDVILLDAVMPEMDGFETCKKLKEALPNTPIIFMTGLTEIDDVVKGFDAGGIDYVTKPIAPDEVIARIK
196158081	2.12757e+06	Alteromonas macleodii 'Deep ecotype'	_ sigma-54 dependent DNA-binding response regulator, Fis family protein _	91	ILVVDDDLGIQKQLKWSLTDYNVVFADDHTSAIAQLRRFEPKVVTLDLGLPPDPANASEGLRILHDIISLAPRTKVIVVTGNNDKQHALKAIDFGAYDFYQKPIDSDTIK
75907252	YP	Anabaena variabilis ATCC 29413	_321548.1_ multi-sensor hybrid histidine kinase _	0	ILLAEDIVVNQKVALLILKKLGYRADVVANGLEVLEALQRQSYDVVLMDVNMPEMDGLKASQIICQTWSPRSRPYIIAMTANAMRGDREACLAAGMDHYISKPLQLEELAKAL
75907786	YP	Anabaena variabilis ATCC 29413	_322082.1_ multi-sensor hybrid histidine kinase _	0	ILLAEDNLVNQKVALKQLQSLGYTADVAANGKEVLQLLKQIPYDLILMDCQMPILDGLETTKEIHRWAESSFASGRRPVIIAMTANAMKEDKQMCLDVGMDDYLSKPVMKEQLATAL
75910827	YP	Anabaena variabilis ATCC 29413	_325123.1_ multi-sensor hybrid histidine kinase _	0	ILVVDDVADSRLLLVKLLSSVGFVVQEAANGQEALAIWQQWHPQLILMDMRMPIMDGYEATHFIRSAETENHTTIPNPHTIIIALTAHAFEEQRQAMLQVGCDDLINKPFSEKEILEKL
75909218	323514	Anabaena variabilis ATCC 29413	_ histidine kinase _	0	ILLVEDDLPNGELMQTHLSKLGYNVTWVKNAHEMWAKLDQQQAAVILMDIRLPDGDGLDLVKQLREKSQYQQIPIIAQTAMAMKGDRSICLSAGVNDYISKPIDLNLLA
75907851	YP	Anabaena variabilis ATCC 29413	_322147.1_ multi-component transcriptional regulator _	125	QSFSQFPKVILLKINGQKSSQKSLKLLEQLKQQFPNTPILVIAEQDNLMQRVAVARLGVQRFLTKPTNTE
75908099	322395	Anabaena variabilis ATCC 29413	_ two component transcriptional regulator _	127	ILVVDDEASIRRILETRLSMIGYDVVTAGDGEEALETFRKSDPDLVVLDVMMPKLDGYGVCQELRKESDVPIIMLTALGDVADRITGLELGADDYVVKPFSPKELEARI
75907788	322084	Anabaena variabilis ATCC 29413	_ response regulator receiver _CheY_ modulated serine phosphatase _	12	ILVIDDDPVVRTVLKRTLENQGYETTVVNNGEEGIIQAKLLRPALIICDWVMSGLDGLEVCRQVKANPELATSFFILLTAKGAAPGEEKDRVKGLDAGADEFISKPIEMIELKARV
75909927	324223	Anabaena variabilis ATCC 29413	_ response regulator receiver _CheY_ modulated serine phosphatase _	12	ILIIDDDISIQTLLKRILQKQGYQIVTASNGEEGITQALTSRPALIICDWIMPGLNGLEVCHRIKTNPNLSTTFFILLTSLDSVADRVKGLDAGADDFITKPIEQNELQARV
75907227	321523	Anabaena variabilis ATCC 29413	_ response regulator receiver domain-containing protein _	14	LLVIEDSDEDFEALQRVMQREVVLNPVFRCTDGEDALDFLYHTGAYLDPATAPCPSIILLDLNLPGTDGREILAQIKQDHNLKHIPVIVLTTSCNPKDIEICYQYCAASYILKPIDINRLVKTI
75907782	322078	Anabaena variabilis ATCC 29413	_ response regulator receiver domain-containing protein _	14	ILLVEDDEVDVMNVKRAFQKVNITNPIYLADNGLEALKILRGNHTQTPNFPHERRLILLDLNMPKMGGIEFLQELRSDPQLRLTPVVVMTTSNQDKDRVEAYNLNVAGYILKPVTFSSFVEI
75910057	324353	Anabaena variabilis ATCC 29413	_ response regulator receiver domain-containing protein _	14	IFLVEDNKADIRLIQEAFKNSQLPHEVVTVRDGMDAMAYLRREGEYTHAPRPDLILLDLNLPRKDGREVLAEIKADPVLKRIPVVVLTTSRNEDDIFHSYDLHVNCYITKSRNLTQLFQIV
75910541	324837	Anabaena variabilis ATCC 29413	_ response regulator receiver domain-containing protein _	14	VLLVEDNPGDVELTRIALEDSKISVHLSVVEDGVEAMAFLRKQDKYANVPHPDIVLLDFNLPRKDGREVLAEIKTDSYLKRIPVVVLTTSQAEEDILKAYNLAANCYITKPVDFDQFVRIV
75907645	321941	Anabaena variabilis ATCC 29413	_ response regulator receiver _CheY_ and GAF domain-containing protein _	15	ILVVDDEPDNLDLLYRTFRRDFNVLKADSGVNALEVLAAEGEVAVIISDQRMPEMKGTEFLSKTVPQFPDTVRIILTGFTDIEDLVEAINAGQVYKYITKPWDPGELKAVV
75906885	321181	Anabaena variabilis ATCC 29413	_ response regulator receiver _CheY_ and GAF modulated serine phosphatase _	15	LMVVDDEPDNLDLLYRTFRRDFHVYKANHARKALEILAQEGEMAVIISDQRMPEMNGTEFLSLTVEKFPDTIRILLTGFTDVEDLVEAINSGQVFKYITKPWNPERLKNLV
75908456	322752	Anabaena variabilis ATCC 29413	_ adenylate/guanylate cyclase _	15	ILVVDDEPDNLDLLYRTFYRDYKVLRAISGPAALDLLAQEGEIAVIISDQRMPIMSGTEFLSLTATQYPDIIRIILTGYTDVEDLVEAINAGKVFKYVTKPWEAEELKAVV
75907720	322016	Anabaena variabilis ATCC 29413	_ two component transcriptional regulator _	171	ILVIDDDPAISELVAVNLEMAGYDVSQAEDGIKGQALALQLQPDLIMLDLMLPRVDGFTVCQRLRRDERTAEIPVLMLTALSQTQDKVEGFNAGADDYLTKPFEVEEMLARV
75907309	321605	Anabaena variabilis ATCC 29413	_ multi-sensor hybrid histidine kinase _	172	ILLVDDNADMREYVKRLLSRHYVVETATDGLAALEALADHLPDLVLTDVMMPRLDGFGLLSALRSNNRTREIPIILLSARAGEEAKVEGLEAGADDYLIKPFSARELLARV
75906838	321134	Anabaena variabilis ATCC 29413	_ two component transcriptional regulator _	173	ILLVEDEVKLARFVELELSSEGYKVSVAHDGITGLTLARESTPDLAVLDWMLPGLSGLEICRRLRATGNSIPVILLTARDEVSDRVAGLDAGADDYVVKPFSIEELLARI
75910866	325162	Anabaena variabilis ATCC 29413	_ response regulator receiver domain-containing protein _	173	ILLVEDEVKLARFLELELNYQGYQVSVAYDGLTAMIAAGQLQLDLIILDWKIPGLSAWEICHRLRNSAKNIPIILLTVKDEVTARIAGLDASAADYVVKPFNIEELLAKV
75909975	324271	Anabaena variabilis ATCC 29413	_ multi-sensor hybrid histidine kinase _	176	ILIVDDEAAIVEITKTSLEDYNYKTLTAKNGIEAIALYAQHQDKISMVLMDIMMPSMDGLTAIRILQEMNPQLKIIAISGITGNNQLAEAANAGVNAFLRKPYNIYDLVHAI
75910949	YP	Anabaena variabilis ATCC 29413	_325245.1_ PAS/PAC sensor hybrid histidine kinase _	176	ILVVDDEAAIRDITKTSLESYNYKAITASDGIEAIALYAERQDEISLVLTDMVMPSMDGLTTIRTLQKINPLVKIIAVSGLAAHDKVNAAYNMGIQAFLSKPYTANQLLKTIN
75910540	YP	Anabaena variabilis ATCC 29413	_324836.1_ PAS/PAC sensor hybrid histidine kinase _	176	ILIVDDEVSIQDITKTSLESHQYETLVANDGVEAIALYAKNADKISAVLMDIMLPVLDGLTTIRTLRKINPQVKIIATSGLISKNKLTEIVNTGANSFLAKPYTVNELLLAL
75907566	321862	Anabaena variabilis ATCC 29413	_ PAS/PAC sensor hybrid histidine kinase _	176	ILVVDDEAIIREITKSSLEAYNYRVLTASDGEEAISIYTGYQEQISVVLLDMMMPSMDGAIAIRKLQKINPQIKIIAISGLLSEPHESAIANMGVKAFLSKPCTAKELVQTI
75906423	320719	Anabaena variabilis ATCC 29413	_ multi-sensor hybrid histidine kinase _	176	ILVVDDETIIQQTAQEALADYNYRILVANDGIEAIALYVEYQPEISVVLLDMVMPNIDGLTAIRTLRTINPKVKIIASSGLPANEQQAIVAGANRFISKPYTTTDLLTTL
75909983	324279	Anabaena variabilis ATCC 29413	_ signal transduction histidine kinase CheA _	192	ILVVDDAISLRQTLSLTLQKSGYQVIQAQNGAEALEQLQRHPEIQLVVSDLEMPRMNGFEFLSHMQHNPKYTKLPVIILTSRSAEKHRQLAQELGAKAYLSKPYLEHELINTI
75908138	322434	Anabaena variabilis ATCC 29413	_ two component transcriptional regulator _	1	ILVVDDDFGVRNLIYRFLSRKYQIESAADGKTALSLFEQFNPALVILDWNLPDTSGYSLCQEMQSRNNVLVMILTGRTEEADKIKILAAGADDFITKPFSLAEIEVRV
75909575	323871	Anabaena variabilis ATCC 29413	_ two component transcriptional regulator _	1	ILVVEDEELIQEMLAVALEEEGYGVVTAADGRSAVEYLKSFEPNGGDFPFDLVILDLMLPQINGLDICRLLRHQGNPVPILMLSAKGSETDRVLGLEVGADDYLTKPFSMRELVAR
75908165	322461	Anabaena variabilis ATCC 29413	_ two component transcriptional regulator _	1	ILIVEDESEIAQLIQHSLEKEGFSCRTSRDGINALRMFQEQPPDLIILDLMIPGLDGLEVCARIRQKPGAKDPYILMLTAKGEEIDRVIGLSTGADDYMVKPFSPRELVARVR
75907014	321310	Anabaena variabilis ATCC 29413	_ response regulator receiver domain-containing protein _	1	VLLVDDEVALCESLAYTLQKEGYTVTTVADGQSAIKQFHKQVPDVILLDLMLPEVSGMEVCWRIRAFSDVPIVMLTAKDQDIDKIWGLEAGADDYVTKPFNTRELLARIK
75908143	322439	Anabaena variabilis ATCC 29413	_ two component transcriptional regulator _	1	VLVIETDDSLANQLSFDLQEAGYDAILASDATTGLQYCRDRQPALVVLDRMLAGESGLSLCKNLRNTGVRSPVLVLMARDTVDDRVACLEAGADDYILKPYRPEDFLR
75906526	320822	Anabaena variabilis ATCC 29413	_ two component LuxR family transcriptional regulator _	226	LLLVDDEPGLREAVKDYLQESGFSVQVASNAREGWDLMQQSTPDLVISDVMMPQVDGYQFLKQLREDPRFQSLPVVFLTAKGMTSDRIQGYQAGVDAYLPKPFDPDELVAII
75907252	321548	Anabaena variabilis ATCC 29413	_ multi-sensor hybrid histidine kinase _	236	LLIVDDNPTNRQILRLQAEPWQMETYTAPSGAEALALIDQGMAFDIAILDVQMPEMDGLTLARQIRQRPSYQHLPLVILTSWGQPDTDLSDIEFAACLNKPIKQSQLFDV
75908637	YP	Anabaena variabilis ATCC 29413	_322933.1_ response regulator receiver modulated diguanylate cyclase _	242	VMIVDDDPQILTALQTLLSAWGIKVYTLAHSQGFLEAMALAEPELLILKMEMPSTSGIELCQIARQEPQWAGLPILFLTNRHDTLTRQQIFIAGADDYISKPIVEPELIGRI
75906463	YP	Anabaena variabilis ATCC 29413	_320759.1_ multi-component transcriptional regulator _	242	VLAVDDDPQILAILQTLLHPWGLQVITLDDPRQFWETLRDVNPDLLILDVEMPYTNGIELCQVVRNDPQWSELPILFLTVHKDGEIVNQVFSVGADDFVSKPIVGPELVTRI
75812473	320092	Anabaena variabilis ATCC 29413	_ response regulator receiver hybrid histidine kinase _	26	VLLIDDNINDRLLAICSLKKEFADLQIAEIKNPQELAQALENGVFDVVVTDYQISWIDGISILRTIKQHYPNCPVVMFTSSGSQEIAVEAMKSGLDDYVLKSP
75812821	YP	Anabaena variabilis ATCC 29413	_320438.1_ multi-component transcriptional regulator _	27	VLLIDDDTDLIERMQANASNWSIHLETVTDLTLARQRLQYLTPDAIILDLTFPNTTESGLTLLAQLKHQFSTIPVLVLTGLGDLTKRVEVTRLGANAFLQKPATPTEVFQAV
75908636	YP	Anabaena variabilis ATCC 29413	_322932.1_ PAS/PAC sensor hybrid histidine kinase _	288	VLVVEDDPDLAQVLIAMFNRHGISTFYAQKGREAIQISQNIIPDLLVLDLGLPEWDGFAVVDWLRQHQHLYHVPLVVYTARDLDESDRQRLKLGETLFLTKGRINPQEFEQR
75906463	YP	Anabaena variabilis ATCC 29413	_320759.1_ multi-component transcriptional regulator _	288	ILIVEDDADLAELFVTLFERHDIETFSAKTGREAIHLSQEVNPDLLILDLILPETDGFAVVDWLQKHQRLCNIPVVVYSAKDLDESERKRLKLGHTEFLTK
75909659	323955	Anabaena variabilis ATCC 29413	_ two component transcriptional regulator _	28	VLFVEDEAKIANFVQAGLKEQGFVVDYCDNGDEGYLRALDNEYDAIILDIMVPGKDGLSILKQLRQKGRNAPVILLTARNELDDRLAGLNLGADDYIAKPFFVEELVARI
75907669	321965	Anabaena variabilis ATCC 29413	_ two component transcriptional regulator _	28	ILLVEDDYEQLEPLQGILSEAGYIVDTAEDGEIAEWLISQKDYDLLILDWMLPTISGLSLCRQYRCSGKTAPILMLTARDTTPDKVMGLDAGADDYLVKPADLVELLARV
75812821	320438	Anabaena variabilis ATCC 29413	_ multi-component transcriptional regulator _	28	LLIVENDRDTAAALTTSLVAQQFTVDTASDSRSALELAEATEYDLIVLDVMLPDENGIRLCRQLRTQNQQEPILLLTRKVNPADRIAGFEAGADDYITKPYELSELLARI
75908637	322933	Anabaena variabilis ATCC 29413	_ response regulator receiver modulated diguanylate cyclase _	28	ILLVEDDELIGELLVKSLTSQHYTVDFAKDGEEGWNFAELYTYDLILLDLILPKLDGISFCRQLRASGNQTPVLLLTSQDTSITKVAGLDAGADDYVAKPFDFQELLARI
75907851	322147	Anabaena variabilis ATCC 29413	_ multi-component transcriptional regulator _	28	ILLVEDDVITATLLREVLTAEYYTVELATDGQNGLTLATLSNFDLILLDLLIPKLDGINLCRQLRAQGIQKPILLLTAKDQSADVVKGLDAGADDYVTKPYDISELLARI
75908249	322545	Anabaena variabilis ATCC 29413	_ two component LuxR family transcriptional regulator _	2	VLLVDDQNLIRQGLRALLELESDIEIVGEAENGKIAIDLIPQFHPDVVLMDMRMPIMDGVAATQEIQRNFPSVKVLVLTTFDDDEYVKAALQNGAMGYLLKDTPSEELAVAI
75812776	320393	Anabaena variabilis ATCC 29413	_ two component LuxR family transcriptional regulator _	2	VLIADDHAIFRQGLATIINRDPEMQVIAQAENGEQAIAAFREHQPDVTLMDLRMPEVEGVAAIGAICATAKSARIIVLTTYDSDEDIYRGLQAGAKGYLLKETEPDELLNAIR
75907780	322076	Anabaena variabilis ATCC 29413	_ two component LuxR family transcriptional regulator _	2	IILIEDHDLTRMGLRAALQANTGIKVIGEAANATQGLKLLETAKPDVAVVDIGLPDMDGIELTRKFRRYQAESGQTHTKILILTMDHTEDAVLAAFAAGADSYYMKETSISRLTEAIQ
75906884	321180	Anabaena variabilis ATCC 29413	_ two component LuxR family transcriptional regulator _	2	IALIEDHDLTRVGIRTALLQKEEIEVVGEAGNATEGLNMLKKVQPDIAIIDIGLPDKDGIELTKELKSISNGADLPTKVLILTLRDNKEAVLAAFAAGADSYCMKDIRFDNLLEAVR
75812313	319932	Anabaena variabilis ATCC 29413	_ two component LuxR family transcriptional regulator _	2	VFIEDNDIIRLGITTAINQQPDIEMVGVGHTGNEGVELVKSLSPDVALVDIGLPDISGIEVIKQIKKSKSNTKVVVISCNSCQEVITAAISSGADSYILKKNNTSLIVEAI
75910715	325011	Anabaena variabilis ATCC 29413	_ two component LuxR family transcriptional regulator _	2	ILIVEDDPMMQLGLEQSLMAHPQLEIVGQAEDGYLGVQAALALKPDLVVMDIGLPRLDGIATTQQIKAALPETHVVMLTSHKTETEIIAALSSGADAYCIKGASIERLLNAI
75812851	320468	Anabaena variabilis ATCC 29413	_ two component LuxR family transcriptional regulator _	2	VVIIENENISRVGAATILSETGKIQVCGLAKTGKQGIELVDQQKPDIVVINIDLPDINGTDVISLIKCKHTSIKIVVMTANSSRDTINAAISNGADCYYCKNNAREEV
75909373	323669	Anabaena variabilis ATCC 29413	_ response regulator receiver domain-containing protein _	2	VLVVDDHELTRLTLQLAFSSQENIQVVGLASNGQEAIEMVRDSHPDVIVLDLQMPVMDGWSASCHIKAISPNTQILAYSSVEDIRFLDTKTTSNFDDVCKKDVPTKELIALV
75907783	322079	Anabaena variabilis ATCC 29413	_ response regulator receiver signal transduction histidine kinase _	305	ILVVDDDEVDRMTVRRALVKAGVRMEMSEVSDGNTALSILRNTSFDCAFIDYRLPDQDGLNLIETIRSLNIKIPLVVLTSQGDEQIAVELMKAGATDYLSK
75908963	323259	Anabaena variabilis ATCC 29413	_ response regulator receiver domain-containing protein _	31	VLAVEDHDDSLLLISYALESIGCRFICQKDSSATVLVAKEYQPDLIMLDILLPGLNGLEVVRHLKEEPLTQEIPVIAVTALATKEDQNKIMKAGFDEYICKPYMIEDLEAV
75909067	323363	Anabaena variabilis ATCC 29413	_ response regulator receiver domain-containing protein _	31	VLIVEDDLINARVFSKILTKRGGLGVKHTENVDEVMKIAQLGEADLILMDVSLSRSVYQGKSVDGIKITQMLKSDPQTANLPVILVTAHAMEGDRENFLRLSGADGYISKPVVDHQQFVDQ
75911092	325388	Anabaena variabilis ATCC 29413	_ response regulator receiver domain-containing protein _	31	ILVVEENLHNLELLNSHLKTLNYDCICAKQGVRAIILAQTQRPDLIILDMILSDLSGSQVINHLKQDSKTANIPIIAVVPFILVQNQDRLFLTGADDYITKPYNFIQLNTL
75910491	324787	Anabaena variabilis ATCC 29413	_ response regulator receiver domain-containing protein _	31	ILIVEDNDINRMLLSDYLSYSGYHVQSLSDGSNFFKTIEKFQPDLILLDLKLPDVDGYYLLEQIQQQQEFARIPVIVVSGFAFKVDQKRAIDLGARGYFVKPINLNALLIK
75909214	323510	Anabaena variabilis ATCC 29413	_ response regulator receiver domain-containing protein _	322	ILVIDDTTVVRVKVREMLPPGNFEVLEAKDGLEGINLIRQEKLSLIMLDFLLPKLSGWEVFQQVQAHPELRKIPLVIMSGRKEEVTEKITEPFEYFEFLGKPFDQKQLINAIK
75907253	321549	Anabaena variabilis ATCC 29413	_ response regulator receiver modulated diguanylate cyclase _	323	ILIVDDEPFIRAQLRLSLQCEGYRTAEAEDGRKALTIFQELQPDIVLLDAIMPDLDGFECCTRLQLLEDGKYTPVLMITGLEDQESVDRAFEVGAIDYVTKPIHWPVLRQRV
75909377	YP	Anabaena variabilis ATCC 29413	_323673.1_ response regulator receiver modulated diguanylate cyclase _	323	ISRLWERTPILMITSLNDAESVDRAFEAGATDYITKPIHWAVLRQRL
75909212	323508	Anabaena variabilis ATCC 29413	_ PAS/PAC sensor hybrid histidine kinase _	33	ILVVEDEVIVARTIASQLNQLGYIVIGTASSGKAAIAKAIETSPELVFMDIILKGEIDGITTASYIREHLDIPVIFLTAYGDDNTIERAKITQPFGYIVKPFTSKDLRI
75910523	324819	Anabaena variabilis ATCC 29413	_ PAS/PAC sensor hybrid histidine kinase _	33	VLIVEDEYILAINLQESLESLGYTVVDIADSAELAIDKATELQPNLILMDIRLRGEEDGIHAAAKIWQNLQIPIIYVTGHSDKSTVERATLTSPFGYILKPIREKELYVAI
75909874	324170	Anabaena variabilis ATCC 29413	_ response regulator receiver modulated PAS/PAC sensor-containing diguanylate cyclase _	33	ILVVEDEAALALNIKNSLQALGYNVLEITNSPQEAIKKVAEKHPDLVLFDIRLSGEINGIQVANIIQDNFHIPVLCIIEYSQHLELHNKQLDESFAYLLKPFAEKDLHLAV
75906291	320587	Anabaena variabilis ATCC 29413	_ response regulator receiver sensor signal transduction histidine kinase _	33	ILIVEDEQLVADDLRETLEHLGYGVPALVASGEEAIFMAGNLRPDLVLMDIRLEGKIDGIEASFAIQSRFDLPVVYLTANADRATLERAKASHPFGYILKPFDERILATTI
75908617	322913	Anabaena variabilis ATCC 29413	_ response regulator receiver domain-containing protein _	340	LVIDDHESVLSGTVEVLKRHYPEGDFVLAINAESAFNQLTICPPDLIVMDLSIPEKLGIKARPDTGVRLLRTLMKNYPNLNIIVQSAHIR
75910628	324924	Anabaena variabilis ATCC 29413	_ response regulator receiver domain-containing protein _	35	ILIVDDEPNIVILLEQALEALEDEGVELLTARNGEEALESIKNEQPNLVFLDVMMPKMSGLEVCQIVKHDLQMTHVYIVMLTAKGQEFDKQRGMDVGADLYLTKPFRPKEVLE
75909377	323673	Anabaena variabilis ATCC 29413	_ response regulator receiver modulated diguanylate cyclase _	35	ILVADDDKTIRMLLREAMEKEGYRVVEVTDGKQCLDAYEAVKPDIVLLDAMMPVMDGFTCCKQLLQI
75906289	320585	Anabaena variabilis ATCC 29413	_ signal transduction histidine kinase _	379	ILLIDDCAEDREIYRFFLQQDRLHTYEIFQLETAQEAMTWCEQQTPDVILLDYLLPDYDGLEFLQQLREHLNNSQSAVIMLTGQGDESIAVCAMKNGAQDYLVKNSLTPETLQSAI
75907786	322082	Anabaena variabilis ATCC 29413	_ multi-sensor hybrid histidine kinase _	393	LLVVDDHATNRKIIYHQVSRWGMQVDQADRAVAALGMIVEACQQNKPYDVILIDMQMPEMDGMALGKQIKANSAIPPTPLIMLTSTNQRDEVQQAIKIGFAAYLVKPVKSSRLLDTI
75910296	324592	Anabaena variabilis ATCC 29413	_ two component LuxR family transcriptional regulator _	3	VVLIEDHDLTRIGLRATLQKLDGIEVIGDARDAASGLKLLKSTQPDIAIVDVGLPDMSGIELTQHFFNSMDTQQTPQTKILIMTMQDSEDTVLAAFAAGADSYCMKDASTDKLVEAL
75909280	323576	Anabaena variabilis ATCC 29413	_ two component LuxR family transcriptional regulator _	3	VMVVAASHVIRAGLSAVIAGNPQMTVVGSVSDIDGMTKEIQQLQLDVVLLDWGRNSQSDWDKLLVIQEQQDSLRVMLIVKELEGIDIEAALRSGVRGILLDTSTESEILTAI
75910055	324351	Anabaena variabilis ATCC 29413	_ two component LuxR family transcriptional regulator _	3	ILLVEDDELFRLGLRVRLQQEAGLEIIAEAEDGETALDLIKQNSLDVVLLDVGLPGLGGIEACKQIKQQNPQLPILVLTSHSQKPLISKLIEAGAQGYCLKGIIAEKLVLAL
75812491	320110	Anabaena variabilis ATCC 29413	_ two component LuxR family transcriptional regulator _	3	ILLVEDDELFRLGLRVRLQQEPGLEIVAEAEDGETAIELLKQIPLDVVLLDVGLPGIGGIEACKQIKQQNPLLPVLVFTSHSQKPLITRLIEAGAQGYCLKGIAAEKLVLAL
75906761	321057	Anabaena variabilis ATCC 29413	_ response regulator receiver domain-containing protein _	413	LLLVDQDPIFRLGLRVALEAMPNIEVVSEAPTDTAALQILAELAQINPNQVDLVILELGNSRSVDSQQQGLQLCQQLKATYPTLPTLLLSAIPDAGLIMAARAAGVRGYCPKGTPISQLVTVI
75907486	321782	Anabaena variabilis ATCC 29413	_ two component transcriptional regulator _	414	IVEGNPHLRSLLGWHLQQLEYRVHQAASIYQAREAFLSHQPTLVILDADLPDGDGIEFCRWLHRQQQPLILMLSARTNEADIVAGLKAGADDYLSKPFGMQEFLARV
75906284	320580	Anabaena variabilis ATCC 29413	_ response regulator receiver domain-containing protein _	43	ILIVEDSPSELELMSRYLQESGYDVIKAAGAKEAIEKALLEKPDVIVTDVVMPGMSGFELCRSLKKHPLTEKLPIVICSSKNQEIDRLWAMKQGADAYITKPYTRENLLRTI
75909980	324276	Anabaena variabilis ATCC 29413	_ response regulator receiver domain-containing protein _	43	VLVIEDGLTDREILIRYLQQAGYSVISATSSEEAQEKLDVTQPDLIFLDVILPGKSGFEICRELKNNPKTSNIPVVFCSTKNSDVDKTWGNMLGAEAYLSKPINQEELTLTL
75906731	321027	Anabaena variabilis ATCC 29413	_ response regulator receiver domain-containing protein _	43	VLIVEDSLAQREMITDLLKASGLTVTHATDGLEALEAIKEEPPDLVVLDIVMPKMNGYEVCRRLKSDPKTQNVPVVMCSSKGEEFDRYWGMKQGADAYIAKPFQPTELVGTV
75906283	320579	Anabaena variabilis ATCC 29413	_ response regulator receiver domain-containing protein _	45	IACIDDSQTVLNSIRSFLDENVFTVVTINDPVKALMQVLRSKPDLILLDVTMPNLDGYELCSLLRRHSAFKNTPIIMVTGRTGFVDRAKAKMVRSSGYLTKPFDQSELLKMV
75907325	321621	Anabaena variabilis ATCC 29413	_ response regulator receiver domain-containing protein _	45	IVSVDDSPTILKEISYFLESENFTVITINDPLKAAMSIIRHKPDLILLDLNMAGIDGYELCKIIRNNSMFKNTPIIFVTSYKGLVDKVRARLAGASGYLTKPFTRAELLKIV
75906732	321028	Anabaena variabilis ATCC 29413	_ response regulator receiver domain-containing protein _	45	ILCIDDTKSICETVESILQTRGYEATGYTIPEVIVLTNPLEALGLIFQLRPNLVFCDISSPELNGYEICAMLRQSQVFRYIPMIMLSSKDKFIDQIRARMAGATDYLIKPFNDDELLM
75909133	323429	Anabaena variabilis ATCC 29413	_ response regulator receiver domain-containing protein _	45	IFCIDDDPTVLNKIKNFLDDQIFAVIGVTDSLKALMEILCTKPDIILINVDMPDLDGYELCSLLRKHSYFKNTPVIMVTAKAGLVNRARAKIVRASGHLTKPFNQGDLLKVI
75909979	324275	Anabaena variabilis ATCC 29413	_ response regulator receiver domain-containing protein _	45	IACVDDSPQVCKLLEDIITANGMKFIKIQDAVQALPLLIQEKPDLIFLDLIMPVASGYEICTQLRRIPTFANTPVIILTGNDGLLDRVRAKVVGSTDFLTKPVAADRVMSVV
75906287	320583	Anabaena variabilis ATCC 29413	_ signal transduction histidine kinase CheA _	47	ILIIDDSINVRRFLALTLEKGGYQVEQAKDGEDAWEKLESGLKVKAVICDIEMPRLDGYGFLDRINSNVDTKNIPVAMLTSRSSNKHRQLAMQLGARAYFSKPYNEQELLGTL
75906728	321024	Anabaena variabilis ATCC 29413	_ signal transduction histidine kinase CheA _	47	VLIVDDSITVRELLSLTFNKAGYRVEQARDGQEAWDKLRSGLPCDIVFCDIEMPRCDGLELLSRIQKDSTLNHLPIAMLTSRGADKHRQMAIQLGASGYFTKPYLEEALLEA
75908887	323183	Anabaena variabilis ATCC 29413	_ PAS/PAC sensor hybrid histidine kinase _	49	VLVVDDDADSRDFLTFILEQEGAEVTLAASALEVLQLLPEIKPDVLVSDISMPDMDGYTLIRQVRTWTAEQGGAIPAIALTAFARQYDREQAFQAGFQLHLPKPLNAEEFFAAV
75911003	325299	Anabaena variabilis ATCC 29413	_ multi-sensor hybrid histidine kinase _	49	VLVVDDESDSRDFVSTVLEQCQAQVRSVPTAKEALQIISQWKPDVLVSDIGMPEEDGYSLIRKLRSLPPEQGGNIPATALTAYARAEDRTRAIQEGFQLHLPKPIEPTELATVV
75909673	323969	Anabaena variabilis ATCC 29413	_ PAS/PAC sensor hybrid histidine kinase _	49	VLIVDDEPDIRDLVTFILEDYDVEVIAVSSAQEALEALSQSLPDIIVSDIGMPDVDGYMLMRQLRQRSPQEGGNLPAIALTAYAGEMNQQQALAAGFQLHISKPVDPDALIEAI
75910023	324319	Anabaena variabilis ATCC 29413	_ PAS/PAC sensor hybrid histidine kinase _	49	VVVDDDADTLELLSFILEQYGVEVKAVNSANEALEAIAQSKPDLLLSDIGMPEVDGYMLIKQIRSMEVALGTKLPAIALTAFAGETNFQKIMSAGFQRHLTKPVEPSELATVI
75908983	323279	Anabaena variabilis ATCC 29413	_ multi-sensor hybrid histidine kinase _	49	ILLVDDQEDVREFFSFALEQCGATVTAVASAIEALEALARSKADVLLSDIGMPQIDGYMLLRQIRKWSPEQGGQIPAIALTAYAGEIDQKQAIAAGFQKHIAKPADPVELAEAI
75910979	YP	Anabaena variabilis ATCC 29413	_325275.1_ PAS/PAC sensor hybrid histidine kinase _	49	VLIVDDETDTRNFLGFLFEEYGAISSTSASVETALAVIDQLKPDILISDIGMAEQDGYTLIRKLRSLPPEQGGEIPAIALTAYSREEDRQQIIEAGFQYHLCKPIDPNQLISVV
75812473	YP	Anabaena variabilis ATCC 29413	_320092.1_ response regulator receiver hybrid histidine kinase _	49	ILVVDDEVDTRDLLISILEQEGSEVITAASAQEAMVAVCNSQFDLFVFDIGLPQEDGYTLLTRVRQLEQQHNREIPAIALTAYAAKEYQQQALAVGFQKYLAKPVEPDELVVAI
75907937	322233	Anabaena variabilis ATCC 29413	_ PAS/PAC sensor hybrid histidine kinase _	49	ILAVDDEPDTREFLKTALEQYGAIVTTAASTSEALKLLQLVKPDVLLSDIGMPNEDGYALIRQIRALSSEQGGNVPAAALTAYTRQSDRLLALTAGFQIHISKPIEPIQLLKIV
75911124	325420	Anabaena variabilis ATCC 29413	_ multi-sensor hybrid histidine kinase _	49	ILVVDDDVDTGEFLTLMLEQSGAEVTAVTSAGEALEVIARTKVDLLLSDIGMPGIDGYMLMQLIRAMPSAKGGKIPAIALTAYAGEINQKQALAAGFQLHLVKPVEAEKLLQ
75906587	320883	Anabaena variabilis ATCC 29413	_ PAS/PAC sensor hybrid histidine kinase _	49	ILVVDDDADMRELAEFILIQFGAQVTTAASAVEALNIFSHFIPDLLLCDIGMPEMDGYSLMRQIRQWLPHEGGTIPAIALTAYAGEINQQQALAAGFHQHISKPVEPEELVQTI
75907309	YP	Anabaena variabilis ATCC 29413	_321605.1_ multi-sensor hybrid histidine kinase _	49	VLVVDDDTDTREFVAFLLEQAGARVITAVSALEALQVFTQSPPDILLSDIGMPDMDGYMLMRQIRALPPDQGGKIPAIALTAYAGEIDEKRALKVGFQRHISKPVDPDNLIRAI
75812816	320433	Anabaena variabilis ATCC 29413	_ multi-sensor hybrid histidine kinase _	49	VLVVDDEPDTRELVAFVLEQHGASVTAACSAQEALTILNQSNFDVLLSDIGMPNIDGYMLIQQLRNLWPQYRQIKAIAFTAYAGEINQQQALKAGFDRHIFKPIEPLTLAQAI
75909297	323593	Anabaena variabilis ATCC 29413	_ response regulator receiver domain-containing protein _	49	ILAVDDNADSLFLTTCVLESYGVQVTTATSALEALETTKQLKFDILIFDIAMPNMDGYTLVQEIRNNALLENRNIPAIALTALGSEDALNMAFMSGFQGYVNKPLDPNILVAEI
75906539	320835	Anabaena variabilis ATCC 29413	_ signal transduction histidine kinase _	49	VLVVDDEPDIRLLFKLVLEEYGVEVATVGSASAALSTLTGNPNGYDILLSDIGLPGEDGYALIRNVRALSPELGGQIPAAALTAYAGYAEYAQALAAGFQMHLAKPVEPYQLVSLV
75910898	325194	Anabaena variabilis ATCC 29413	_ response regulator receiver signal transduction histidine kinase _	50	ILVIDDLPDNFDVIETLLSEQDYTLHYVASGQEAIASLNLFQPDLILLDVMMPGMDGIEVCQRIKAMPQWQSVPIIMVTALTAKEDLARCLKSGADDFISKPINALELRARL
75910979	325275	Anabaena variabilis ATCC 29413	_ PAS/PAC sensor hybrid histidine kinase _	51	ILLVDDKVENLLALEAILERLGANLVRATSGEEALRCLLHQDFAVILLDVQMPGMDGFETATLIRNRGRSRQTPIIFLTAFSTSDQMLFKGYALGAVDYLLKPIDANILTSKV
75910975	325271	Anabaena variabilis ATCC 29413	_ multi-sensor hybrid histidine kinase _	55	LLIIDDDDKFARILLDMARQQGFKAIVSLNSKQGLALAQQYQPNAITLDIYMPDMDGWTLLDRLKHDPQTRHIPVHILSVDDREQRALQLGAITFLQKPVSPEILNHT
75907244	321540	Anabaena variabilis ATCC 29413	_ histidine kinase _	55	VLVVEAVARYIEDLTDQLKTLGYRVVIARSGTEAVEKARRLQPKAIFLNPLLPLLSGWDVLTLLKSDSATRHIPVVVTATGAEKEIAFANRADGFLSLPVEQQSLT
75910892	325188	Anabaena variabilis ATCC 29413	_ GAF sensor hybrid histidine kinase _	55	LLIIEDDVNFARILVDMARQHGFQVLSAQTGTAGLKLAKDFQPMAILLDIRLPEMDGWTVLDRLKHDPTTRHIPVHIMTVEEGRQRGLQLGAIAYLQKPVTSEAISEAL
75907848	322144	Anabaena variabilis ATCC 29413	_ response regulator receiver domain-containing protein _	63	ILLIDDEPTIRELVKICLNDLVGWNVVTAASAQAGLKHLEIERPDVILLDVLMPGMDFTTFLHRLHGNHSLKTIPVILLSVRADWFTSQQLQQLGVVQAIAKPFNPLTLPDQI
75812820	320437	Anabaena variabilis ATCC 29413	_ response regulator receiver domain-containing protein _	63	ILVIDDEPDLCSIVKFTLERLKSWKILTAESAQAGLMQAETQQPDVILLDLSLCGQYRLTMLQSLKTNPTTQSIPVILFTATDPSDDSLGFDPSEFAGVILKPFNVLQLGE
75910540	324836	Anabaena variabilis ATCC 29413	_ PAS/PAC sensor hybrid histidine kinase _	66	VLLVEDNPGDAFLIQELIKEVNTAHLELHPVERLSEALKILASDTYDGSLPPFDVMLLDLSLPDSQGIDTFVRANRETNLLPIIVLTGIDDENLALTAMQKGAQDYLVKGQ
75910975	YP	Anabaena variabilis ATCC 29413	_325271.1_ multi-sensor hybrid histidine kinase _	67	LLVIEDDPVQAQSIIELIGNGDVQSMAVNTGAAALEILRSQHFDCIVLDLGLPDMSGLELLEQIKQEPNLVKLPIIVYTGKEISRQEETQLRRLAESIIIKNVRSPERLLD
75910892	YP	Anabaena variabilis ATCC 29413	_325188.1_ GAF sensor hybrid histidine kinase _	67	LLVVEDDELQRQSIVELIGNSDVATVAVGTGAAALEAIRTQQFDCLVLDLGLPDMTGFELMEQIKREANGATLPIIVYTGREISKTQETELRRIAETIIVKDVRSPERLLDE
75910892	YP	Anabaena variabilis ATCC 29413	_325188.1_ GAF sensor hybrid histidine kinase _	71	VLIVDDDVRNIFALTSMLERYQMQVIYAENGREGISLLENTQDIDVVLMDVMMPEMDGYETMQLIRKKEQFRALPIIALTAKAMQGDRDQCIAAGASDYIAKPVDTEQLLSL
75910975	YP	Anabaena variabilis ATCC 29413	_325271.1_ multi-sensor hybrid histidine kinase _	71	ILIIDDDLRNIFAITSLLESYQMQVLFAENGRDGIELLQANSDINAVLMDVMMPEMDGYETTRSIRQQKQFRTLPIIALTAKAMPGDREKCIEAGASDYITKPVDTEQLLSL
75908368	322664	Anabaena variabilis ATCC 29413	_ response regulator receiver signal transduction histidine kinase _	8	VLIVDDIPTNIKVLFDILNQAGFRVSVAKNGLSALAKVQETLPNLILLDVMMPGMDGFETCRHLKANPKTKDIPVIFMTALSDTVNKVKGLQIGAVDYITKPIEYEEVLARI
75910180	324476	Anabaena variabilis ATCC 29413	_ response regulator receiver signal transduction histidine kinase _	8	ILAVDDNPNNLQVLSSFLDNSSFEVWAARSGEKALQRLENDLLPDLILLDVMMPGMDGFETCQRLKSDQRFCDIPVVFMTALSETEDKVKGFQLGAVDYITKPFQHEEVLVRI
75906348	320644	Anabaena variabilis ATCC 29413	_ response regulator receiver modulated diguanylate cyclase/phosphodiesterase _	8	ILIIDDMADNLRVLSSILAREGYNVRKALNWQMACTACQTLLPDLILLDIMMPEVDGYEVCQRFKAWELTSDIPVIFISALDDVFDKVKAFKVGGVDYITKPFELEEVLVRV
75910827	325123	Anabaena variabilis ATCC 29413	_ multi-sensor hybrid histidine kinase _	8	ILLIDNSLENWRCLSGFLAETKYSLQRVSTAKISISSVSELMPDLILIDSSIDKIDGLSFCQNLKAEKSLQDISILLLTYIEQLSEYSSYFQIGVSDFISKPLRQEEFL
75910334	324630	Anabaena variabilis ATCC 29413	_ response regulator receiver signal transduction histidine kinase _	8	ILIVDDNPTNLKVLSDAISSLGWEALIATDGESAIEEAEYAQPDIILLDVMMPGIDGFQTCTELKKKSSTKHIPVIFLTALTDQFDKVLGLVTGGVDYITKPFNLDEVLARI
75906349	320645	Anabaena variabilis ATCC 29413	_ response regulator receiver signal transduction histidine kinase _	8	ILVVDDTPDNLRLLSAMLTAQGFEVRKALNGKMALTACQMLLPDVILLDVNMPEMDGYQVCQQLKDDEHTSDIPVIFISALDDVLDKVKAFDVGGVDYITKPFHGAEVILRI
75908776	323072	Anabaena variabilis ATCC 29413	_ response regulator receiver signal transduction histidine kinase _	8	VLLVDDNPNNLKVLSEAVQGCGWKALMATDGESALEQTEYAHPDLILLDVMMPGIDGFETCRRLKANPITQNTPVIFMTALSDATDKVKGLEIGAVDYITKPFQHEEVIARL
75908369	322665	Anabaena variabilis ATCC 29413	_ response regulator receiver signal transduction histidine kinase _	8	ILVVDDTLTNLEIISEALIGAGFEVATAVDGKKALEQIQSRVPDLILLDVMMPVMDGFETCKNLKIQPETHDIPVIFMTAITDTNSKVEALSLGAVDYITKPFHKAEVLARI
220917277	2.49258e+06	Anaeromyxobacter dehalogenans 2CP-1	_ two component sigma-54 specific Fis family transcriptional regulator _	111	VLLVDDEPGWLRTMSLSLERSLGVTNLLTCQDPREVMGLLGRHEVGLVLLDLTMPHLPGEELLRRIVEAHPEVSVIVVSGLNQLETAVRCMQAGAFDYFVKTSEEDRIVK
220916959	2.49226e+06	Anaeromyxobacter dehalogenans 2CP-1	_ two component sigma-54 specific Fis family transcriptional regulator _	111	ILAVDDEAAWLRSVSLTLERAAGITHLLTCQDARRVMEVLDGNDVGVVLLDLTMPHLSGEDLLGRISVEHPDVKVIVVSGMNQVETAVRCMKLGAFDYHVKTEEEDRLVA
220916905	2.49221e+06	Anaeromyxobacter dehalogenans 2CP-1	_ two component sigma-54 specific Fis family transcriptional regulator _	111	VLLVDDEAAWLRSMRVALQRAGVDHVLATQEPREVPELLAREPVGLVLLDLNMPHLSGEALLERLAAERPEVAVIVISGMNQVETAVRCVKAGALDYYVKTAEEDRLV
220917453	2.49276e+06	Anaeromyxobacter dehalogenans 2CP-1	_ response regulator receiver protein _	125	VLLVDDDAAICEFLATLLDLEGLAPRVAPGAQEALGALADADAVLLDVAMPGMDGLELCRRMRAAGFGGPILVVSARPGPDLPRKAVEAGASGFVRKPFDNAELIAC
220916851	2.49216e+06	Anaeromyxobacter dehalogenans 2CP-1	_ PAS/PAC sensor hybrid histidine kinase _	143	VLVLDDDPLVARAIGRTLSRDCAVDVSTDPVQALRRVHSGERWDVILCDLMMPELAGMDVHASIQEIDPGQAARIVFMTGGAFTTRAREFLERVPNARLEKPLDPATLAR
220919452	2.49476e+06	Anaeromyxobacter dehalogenans 2CP-1	_ multi-sensor hybrid histidine kinase _	143	ILVVDDEPLVGTVIQRALQGEHEVTVTSSARAALARVAAGERFDLVLSDLLMPEMTGMELYRALRERAPELASRVVFLTGGAFTPAARTFLEQEPVECVEKPFELETIRAL
220916139	2.49144e+06	Anaeromyxobacter dehalogenans 2CP-1	_ response regulator receiver protein _	14	IVVVDDDPDLRETLGELLEEEGYEPRLFENGREALDYLRHGGDPSLILLDLMMPEMNGWQFREAQLRDDRLRDIPVVVMTASRGLDGAPLTAREILYKPIGLGELIDAVE
220918716	2.49402e+06	Anaeromyxobacter dehalogenans 2CP-1	_ multi-sensor signal transduction histidine kinase _	15	VLVVDDDEHVRRALARVLRRSRCRVIDAGDASGALALLEREPVQVVVSDHRMPGTSGVELLRIVKERWPTVQRVLLTGHADSAVIEEAVNRSEIFRFIWKPWDDAHLRITV
220916371	2.49168e+06	Anaeromyxobacter dehalogenans 2CP-1	_ response regulator receiver modulated metal dependent phosphohydrolase _	15	VFIVDDDELILKALARVLELSGYETRCFLRPADALAAIEAEAPVVVISDYMMPSMDGVAFLKAARARFPAAVRILCTAAEDFRVALQAVNAGEVFRIISKPWHQQELLTTV
220919457	YP	Anaeromyxobacter dehalogenans 2CP-1	_002494761.1_ signal transduction histidine kinase, nitrogen specific, NtrB _	17	VVLAEDEDALRTLLGRVLSGSGYQVISGRNGAEALEAARARGGRVDVLLTDLVMPRMTGAELAEALTPGQPGMKVLFMTGHTDDVLVQDRLVDGDVELIQKPFTSEALLAHL
220919551	2.49486e+06	Anaeromyxobacter dehalogenans 2CP-1	_ response regulator receiver protein _	18	VLIVDDAIFMRNMIKDIFSGSGFEVVGEAANGLEAVEKYKELKPDLTTMDIVMPFKSGIEATREIIKHDARAVIVMCSALGQESLVMEAIEAGASDFIVKPFKAEDVLSVV
220916055	2.49136e+06	Anaeromyxobacter dehalogenans 2CP-1	_ winged helix family two component transcriptional regulator _	19	VLVVEDEAPVRRFLRAALAAHGYRIEEAGTVAEAEQLAPGHNPDVFLLDLGLPDGDGIDLARRLREWTRAPIIVLSARGREEDKVTALDAGADDYLTKPFGVNELLARVR
220918763	2.49407e+06	Anaeromyxobacter dehalogenans 2CP-1	_ response regulator receiver protein _	1	VEDDENIAGLLAFLLEREGFAPEVVGDGRAALEHAARHEPASAVVLDQLLPCRNGLSVATALRADPRWGEVPILLLGATRSIGGGAARVDAWLEKPFDPGALITEL
220919496	2.4948e+06	Anaeromyxobacter dehalogenans 2CP-1	_ response regulator receiver protein _	1	ILLVDDNQELLTLLARLVESEGWTPVTVTRGRAAIDRLAPVPPAAAVVDVLLPDMMGYDVAHALRNAKVPFVFMTGVFKGGRAATDASAQHGAAGYFEKPFDARKLMDAL
220917915	2.49322e+06	Anaeromyxobacter dehalogenans 2CP-1	_ response regulator receiver protein _	1	VLVVEDDQDLSSLLEMVLADAGHRVRTAPDGRAALAAVAAEMPGVILLDMRMPVMNGWEFAREFRSRYGRACPIVVVTAAENARLRAEEIGAEDWLAKPFDLDDVLYTV
220915387	2.49069e+06	Anaeromyxobacter dehalogenans 2CP-1	_ response regulator receiver protein _	1	VLLVEPDPGLAEEIRRALGPAGFSVSAVASGEPALARCRELAPDLILLAAELPDMSGFSVCNRLKRAAASVPLLLYTGEATDAAIAAHRATRTRADDYLKKPFELAELLG
220917674	2.49298e+06	Anaeromyxobacter dehalogenans 2CP-1	_ response regulator receiver protein _	23	VLVVDDSASVRLAERVVLTGAGYEVLEAVDGQDALAKLAARPVQLVLTDLNMPNLDGVGLIRAVRTDPAHRLTPVVMVTTESEQARKLEGKAAGATGWIVKPFTPEQLLA
220918012	2.49332e+06	Anaeromyxobacter dehalogenans 2CP-1	_ response regulator receiver protein _	23	LVVDDSSAMRRQLCRALQGAGGIRTTEAVDGADAWRHLAAARFDLLVTDINMPVLDGLKLVSLIRSGGAHRAMPILVVTTEAGEVDRRRALGLGANDYLVKPVQAHQVVEAVR
220919080	2.49438e+06	Anaeromyxobacter dehalogenans 2CP-1	_ winged helix family two component transcriptional regulator _	28	LLLVEDEDRVARVLARGLAEEGHQVDVCGTGLAAREQATTIAYDVVLLDWSLPDLDGISVLREWRSRGLRTPVLLLTARGSTGEKVTGLRAGADDYLVKPFDFDELIARI
220917726	YP	Anaeromyxobacter dehalogenans 2CP-1	_002493030.1_ response regulator receiver protein _	29	VVVEDDPRLADNLCEALRSRGFAAVTAASVLETERLGPVQPFCALVDLRVPGGPDGAAMQRLAAKYPALPMIVVTAHHDAWPALPHQGFFHKPFDTASLLAAV
220917070	2.49237e+06	Anaeromyxobacter dehalogenans 2CP-1	_ two component LuxR family transcriptional regulator _	2	VVIVDDHAILREGVRALLQLQPDIEVVGEGADGMQALEQVERLDPDVVLMDIAMPGLGGIEASLQLKKLGRRARILILSQYEDREYVRRLLKAGVSGYVLKKSAGAELANAV
220917574	2.49288e+06	Anaeromyxobacter dehalogenans 2CP-1	_ response regulator receiver sensor signal transduction histidine kinase _	352	VLLIEEDGPRRDRARALLEAEGFAVDATGSGLDAIARALSLPPDVIVADLRLPDLEGHALAARLKRERSLQAVPFVALGETQEDHDLALAAGADGFASREPDAR
220916621	2.49193e+06	Anaeromyxobacter dehalogenans 2CP-1	_ response regulator receiver protein _	35	VLVVDDDAAGRDALSQLLAMRGYTVREAENGRVALDLIAERVPGFLVLDLEMPVMDGWEVLASLHRSGAFDVITVVVVSAG
220919116	2.49442e+06	Anaeromyxobacter dehalogenans 2CP-1	_ response regulator receiver protein _	35	VLLVEDDDDLRVAMAGCLAGAGFDVTLVATGADAVRAALRDHPQVMVIDVMLPDSGGLGVAEALHRYPELEQVPVLFTTGLAAPAVKALLAPAPVLFKPFGRRQLVSAV
220919348	2.49465e+06	Anaeromyxobacter dehalogenans 2CP-1	_ response regulator receiver protein _	35	ILVVDDNHLIRKLIGLILEGAGYTPIDADSGEAALALVHADPPDLVIVDEVMPGMLGSELVRLLRRSRERRLRSLAVVGVSGHDGAARALLQAGADAFVAKPVEEHPLLDAI
220918088	2.49339e+06	Anaeromyxobacter dehalogenans 2CP-1	_ response regulator receiver protein _	35	VLVVDDNDALRENVAECLEGEGYAVDLAGGGAAALELLEHEPLPAVIILDLMMPGMDGGALAAAIRADPRWAGIRLVITTGLSVSRVRELPVDAVLMKPFGVDELLAVL
220915753	2.49106e+06	Anaeromyxobacter dehalogenans 2CP-1	_ response regulator receiver protein _	35	VLIVDDSEIVARLLQEELEAKGFEIHYAPDAEKATSIILKRQTRPDLILLDVNMPKVDGGQFCRFVKKNERFRSIKVLFCSGEDKEKVQRLVAECGADGFLSK
220915440	2.49074e+06	Anaeromyxobacter dehalogenans 2CP-1	_ histidine kinase _	36	VLVADDERGVRETTARLLRRLGYDALPAASMEEALEVQGRGALDLALVDLAMPAGDGPETLRALRRAQPELPAVLMTGYGLDARVREALEGGFRGILHKPFSLEELAAEV
220916089	2.49139e+06	Anaeromyxobacter dehalogenans 2CP-1	_ two component sigma-54 specific Fis family transcriptional regulator _	37	VLVVDDDPGTRKVARANLTLEGFEVLVASSGAEALARLAESDPLAMVSDLKMPDLDGIALMERVHALRPSLPVVLVTAHATVETAVEAMRKGALHYLTKPLRFDELA
220918955	2.49426e+06	Anaeromyxobacter dehalogenans 2CP-1	_ two component sigma-54 specific Fis family transcriptional regulator _	37	VLVVEDDPRLLDILTRHLDRMGYAVRGAGGAAAALQLLEAAPADVVLSDVRMPGMDGRTLLAEVRARHPDAKVILMTAFGSVDDAVEAMQAGAYSYVVKPFKVETVAA
220917273	2.49258e+06	Anaeromyxobacter dehalogenans 2CP-1	_ two component LuxR family transcriptional regulator _	3	ILLADDHAMFRSGLRRILEAEFPGASVGEAATIGELEARLGAQPCDVLVLDISMAGQNSLNALPGLKERHPRLPVVVLSMYGDRPFVIQALRAGASAYLTKERAPEELIRAI
220917498	2.4928e+06	Anaeromyxobacter dehalogenans 2CP-1	_ two component sigma-54 specific Fis family transcriptional regulator _	41	VLIVDDETDSREALAELTQRWGYDVQTASDGTEALRRAIEGHPDVILTDLVMPNMDGLWLLRALRAELPDCPVVLLTGRGTIQTAVQAIREGAFDFIEKPLEVPRLR
220918575	2.49388e+06	Anaeromyxobacter dehalogenans 2CP-1	_ two component sigma-54 specific Fis family transcriptional regulator _	41	VLVVDDERNIQLTLSRALSMEGYAVETASGGREALEKIAALPVDVVVMDVRMPDLDGLAVLQRARETRPELPIVIMSGHGSIDTVRSAFKLGAFDYLEKPITEKEKLLVAV
220919374	2.49468e+06	Anaeromyxobacter dehalogenans 2CP-1	_ response regulator receiver protein _	43	VILVEDDPGMREAIRALLVRVGYQVAPAVDGAEAWELLARGPRPVAVLVDLYTPRMTGHDLVARIRRTPRLAVVPIIAMSGERASRDRPAAEAFLEKPFSREQLEW
220916462	2.49177e+06	Anaeromyxobacter dehalogenans 2CP-1	_ response regulator receiver protein _	43	VLIVDDSKAVIDALTVAFEDAGFEVATAADGEEVFRKMASVEPDAVLLDVYMPRLNGADVCRLLKAHPHWRKTHLVLMSSRIGEGERDVYRRLGADEVLRKPFDAAAAVAAV
220916519	2.49182e+06	Anaeromyxobacter dehalogenans 2CP-1	_ response regulator receiver protein _	43	IVVIDDDADLRELLVDVLRRLGHAVIGLPAQAGVFQLADLPPADVWVVDHRLPGRLGGEVIRAVHDAPSRHHPVLVGMSGDEHAEEAFRRAGADVFLQKPFDPARLVAAIE
220916158	2.49146e+06	Anaeromyxobacter dehalogenans 2CP-1	_ response regulator receiver protein _	43	ILVIDDDATHLLLTRELLEAEGYDVQVHETAFGATERIIQQAPDLVLVDVNMPALSGEGLVSVLRRRERTRGVRVFLHSSNDEHALREAAARLGIEGYVPKGDPELLRRRV
220915760	2.49106e+06	Anaeromyxobacter dehalogenans 2CP-1	_ response regulator receiver protein _	43	ILLLDDSAITLEMEKAVLEDRGYRVAAASNLLEFQAQLDGFQPEVILTDLMMPDISGKDIVRVLKQDFHTEKIPIILFSSKTDEELEPIAEQAGADGFLSKSHGIERLGDMV
220917990	2.49329e+06	Anaeromyxobacter dehalogenans 2CP-1	_ response regulator receiver _	43	VLIVEPDHAFALSLASLFHEDGCITRLAASAAEAELEVASHRPDLCVVRAELPDLSGFSLCAQLRHDRATARLPVILYASETAPEALAEHARTPWAANGYLAMPLDTEALRK
220916674	2.49198e+06	Anaeromyxobacter dehalogenans 2CP-1	_ response regulator receiver protein _	45	LLLADDSITIQKVVGITFANEDVQVVAVDNGEDALAKARELRPAVILADVVMPRRNGYELCEAVKSDPALRGIPVLLLAGTFEAFDEARARGAHADGHISKPFESQALINKVR
220917872	2.49318e+06	Anaeromyxobacter dehalogenans 2CP-1	_ chemotaxis protein CheA _	47	ILLVDDSPTTRALERSILETAGYRVATAADGAEAWAILEREGADALVADVEMPRLDGFALTEAVRASRALAALPVVLVTAREAEADRARGLAAGASAYLVKSAFDQRSLLDTL
220915445	2.49075e+06	Anaeromyxobacter dehalogenans 2CP-1	_ two component sigma-54 specific Fis family transcriptional regulator _	4	VLVADDKENMRKLLAKILADGYAVEEAEDGARALSLVATRPYDVVVTDIRMPGADGFELLGAVKARAPDTEVVMMTGYATIADAVRAMRMGAFDYLEKPFDPDAALA
220917058	2.49236e+06	Anaeromyxobacter dehalogenans 2CP-1	_ two component sigma-54 specific Fis family transcriptional regulator _	4	ILVVDDEEIVRESLGGWLEKDGYSVHVAADGFAAVEKLKGERWSILIVDLKMPGMDGLQVLEEAKKLLPELAVVIMTAYATVDTAVAAMKLGAYDYLVKPFDPEELS
220915792	2.4911e+06	Anaeromyxobacter dehalogenans 2CP-1	_ two component sigma-54 specific Fis family transcriptional regulator _	4	VLVVDDEASIRHLLSVILVDHGYDPRAVATGEEALKELAVREYDLVLTDVRMPGMGGLGLLREIQRTAPELMVIVMSAYGAHDAAIEAMKTGAYDYLSKPFKPDEVVL
220918715	2.49402e+06	Anaeromyxobacter dehalogenans 2CP-1	_ two component sigma-54 specific Fis family transcriptional regulator _	4	VLVVDDEPTLLRAMEALLRRKGHEVIGLDSSIAATQRLAQEDFDVALFDIKMPQLSGLELLNAVKHRRPEVEVIMMTGHATVETALAAVRAGAYDYLTKPFEDVEVVAR
220915652	2.49096e+06	Anaeromyxobacter dehalogenans 2CP-1	_ two component sigma-54 specific Fis family transcriptional regulator _	4	VLVVDDEPKLGRFVQEMLELDGHEVVRAGGGVEALARLGEGAFDVVVTDLRMPQVDGLAVLRAARARTPPPEVVMMTAHGSAESAVEAMKAGAADYVTKPFPMDELRLRV
220915779	2.49108e+06	Anaeromyxobacter dehalogenans 2CP-1	_ two component sigma-54 specific Fis family transcriptional regulator _	4	ILVVDDEQSMREFLEILLRKQGHEVVAAATLGAALACAAEGDLDLVLSDLRLGAESGIQLLEAVKREAPGTEVIILTAFATTENAIQAMKLGAYDYVLKPFKVEELKL
220919475	2.49478e+06	Anaeromyxobacter dehalogenans 2CP-1	_ two component sigma-54 specific Fis family transcriptional regulator _	4	ILVADDHDALREGMVITLARLGHDVLAVRGGAEAIAAYRKRAADVVVTDLRMVPVDGIEVVRRLRAEDPDATVVVISAHGTIATAVDAMREGAIDFLEKPFSTEALRARV
220915245	2.49055e+06	Anaeromyxobacter dehalogenans 2CP-1	_ two component sigma-54 specific Fis family transcriptional regulator _	4	LMVIDDLDSARQMMKRTLARSYDVYDFPSVAEAVPAVERADFDCIVTDLRMPGIDGIEGLRRFQAKVPEIPVILVTAFATVETAVEAMKAGAFDYLKKPFEPEELE
220917727	2.49303e+06	Anaeromyxobacter dehalogenans 2CP-1	_ response regulator receiver sensor signal transduction histidine kinase _	4	VLVVDDNASLVDNLSEILEGAGYAVAGAGSCAAALALAEQGFDVALVDLKLPDGDGTALAPRLKELSPNGEVVLLTGFATLESAVAAVRAGACAYLVKPCATQELLLTV
220915840	2.49114e+06	Anaeromyxobacter dehalogenans 2CP-1	_ two component sigma-54 specific Fis family transcriptional regulator _	4	VLVVDDESPNLESLGKIFEREGWRVALAASGLAALELLRRERAAVVVTDLMMPGMSGDELLRAVKAVSPESEVVVMTAYGTVEVAVAAMKQGAYDFITKPVKRHAIVKTVR
220915565	2.49087e+06	Anaeromyxobacter dehalogenans 2CP-1	_ two component sigma-54 specific Fis family transcriptional regulator _	4	VLVVDDQKNMRATTAILLRQAGHVVEEAEDGASATQRVQHESFDVVLTDLRMPTVDGMEVLRAVQQASPETQVIVMTAYGTIESAVEAIRRGAYDFLAKPFKESEVLLRV
220916672	2.49198e+06	Anaeromyxobacter dehalogenans 2CP-1	_ response regulator receiver modulated diguanylate cyclase _	4	VLLVDDERFARTVYSDYLRAAGYEVELAEDAEAALALLRQRRFDVLLTDVILPGSSGLDLLSAAKQLDPNLEVTVITALDKVDPAVRAMKSGASDYLVKPVTPEQLQLAL
220919457	2.49476e+06	Anaeromyxobacter dehalogenans 2CP-1	_ signal transduction histidine kinase, nitrogen specific, NtrB _	4	ILDVFRRFLEGEGRTLLLAGSAREALARAAEPGDIDVALVDKNLGDGSGLDVARQLKAAKPDVEVILVTGYASLDSAIQAVQIGAFDYVTKPVSD
220919485	2.49479e+06	Anaeromyxobacter dehalogenans 2CP-1	_ two component sigma-54 specific Fis family transcriptional regulator _	4	VLIVDDEPSVRFVLARTCERAGVPYEEAGSAEEARTKLRASGGGKDGVGLVLLDVRLPGDDGFKLLGEIGGRVDSPFIVVMTAEDTMRSAVEAMKRGAADYLGKPFDLERVE
220915564	2.49087e+06	Anaeromyxobacter dehalogenans 2CP-1	_ response regulator receiver protein _	4	LLVDADRNFREALAIALRLDGHRVEVCVSADEALARLAAGGVDCCLVDAHMAGADEVLAAATAAGARPVMTGPYADVLEQAARRHPAATALPKPFRAAEL
220917204	2.49251e+06	Anaeromyxobacter dehalogenans 2CP-1	_ response regulator receiver modulated metal dependent phosphohydrolase _	4	ILIVDDDAAVRDVITVLLREEGYVCTTVASAEAALDEARKTDYPLVISDVRMPARDGFWLLEQMREASPDTAVIMLTAYGDTEAAVECLRNGAADYLLKPPKVTELIRAI
220919354	2.49466e+06	Anaeromyxobacter dehalogenans 2CP-1	_ multi-sensor signal transduction histidine kinase _	51	ILLVDDRPANLLALESALSGAGYELVKAGSGAEALRFLLRDECALILLDVNMPEMDGYETARLVRQNPRTRNIPVVFITAYGADERRVLSGYEAGAVDYLFKPVTPELLRSKV
220915997	2.4913e+06	Anaeromyxobacter dehalogenans 2CP-1	_ two component sigma-54 specific Fis family transcriptional regulator _	56	VLVVDDDPGVRYTLREILASEGLEVEEATDGEAALEKLGAQPCPLVLTDLRMPRLDGMALLRKITAGHPATRVVVITAHGSERQAVEAVKAGAYDYFKKPFETEELLAVV
220918267	2.49357e+06	Anaeromyxobacter dehalogenans 2CP-1	_ two-component response-regulatory protein YehT _	5	VIVDDEPNARAELRALLQATGEVEIAADCGNAVEALQAVRRERPDVLFLDVQMPVVDGFELLGMLDPDDLPAVVFVTAHDAFALRAFEESAADYLLKPVAPDRLRRSL
220918472	2.49378e+06	Anaeromyxobacter dehalogenans 2CP-1	_ signal transduction histidine kinase with CheB and CheR activity _	62	ILVIEDNIDAAESLRLALEMEGHEVAVAHDGPHGIRRARELTPEVVLCDIGLPEMDGYAVARALRHEPGLRNTLLIALTGYALPDDHRRAVEAGFDAHLTKPTTVEGVQEAI
220918232	2.49354e+06	Anaeromyxobacter dehalogenans 2CP-1	_ histidine kinase _	62	VLVIDDSPDNREVAQSALEMLGHVVSVAGDGPSGIEQAIRGDPEVVVIDIGLPGLDGYEVARRLRAARGRGMTLIALTGYGQPDDRQRALEAGFDVHLTKPVEIEALRRAV
220918248	2.49355e+06	Anaeromyxobacter dehalogenans 2CP-1	_ histidine kinase _	62	ILVVDDNEDAAELLADVLAHAGHEVRVAGDGGRGLELAVRFRPDVALLDIGLPVLDGYELAVQLRRRLGEAAPVVIGVSGYGQPNDRARSAAAGFRHHFVKPADLEALLAAV
220918231	2.49354e+06	Anaeromyxobacter dehalogenans 2CP-1	_ histidine kinase _	62	VLVVEDNPDSAETLRDLLELAGHHADIALDGRQALERCRTARPDAIVCDLGLPDMDGYELARTLRADPELSSVLLVALSGYALPDDLARSAQAGFDAHLAKPARFEAIEA
220916841	2.49215e+06	Anaeromyxobacter dehalogenans 2CP-1	_ histidine kinase _	62	VLVVDDNVDAAETLAELLRHAGHEVAIAHDGPGALAAARAGAPDVVLCDIGLPGMSGYDVARALRRERGPGLLLVAISGYALPEDVHAAHEAGFDRHLAKPPRPDEVERAV
220917584	2.49289e+06	Anaeromyxobacter dehalogenans 2CP-1	_ PAS/PAC sensor hybrid histidine kinase _	62	VLVVDDNVDAAETLAEIVTMLGHTAEIAFDGPGALDKVRTGRPDVVLCDLGLPGMSGYDVAAAIRAMAGERVQLVAVSGYAQPEDVKRATDAGFDAHVAKPADLT
220916860	2.49216e+06	Anaeromyxobacter dehalogenans 2CP-1	_ multi-sensor hybrid histidine kinase _	62	VLVEDEADGRETLGEILRMQGHEVRLAADGRQGIEAVRERLPDALICDVGLPDLNGYEVVARVRAVPGGAATYAVALTGYAQPDDVQRARDAGFDAHLAKPPDLDQLE
220919230	2.49453e+06	Anaeromyxobacter dehalogenans 2CP-1	_ winged helix family two component transcriptional regulator _	63	VLLVDDERDLLSLLDFNLRASGFETLLATTGEQALSHLRRRVPDLVLLDVMLPDVSGTEVCRQIKSDPRTRHVPVVMLTAKGDEVDRVVGFELGADDYVTKPFSVRELVLRL
220918292	2.4936e+06	Anaeromyxobacter dehalogenans 2CP-1	_ response regulator receiver protein _	63	ILVVDDNEILRTLLAQALESGGYVALAADSAESALDVVRFDPPDLCVVDEVMPGMKGSDLIRVLRASPDPRLRSMPIVGLSGVAGGDRALLEAGADVAIRKPFAEAPLLELV
220916685	2.49199e+06	Anaeromyxobacter dehalogenans 2CP-1	_ response regulator receiver protein _	63	ILLIENDAAFAAELSKALEASGFDVRVTGDGKLGIELAREWAPAGVVLSVELPGMSGYLVCQKLKKDDALKATPLVLTSAEATEETFENHRKLKVRADEYLLKPFPAAALLEKL
220915879	2.49118e+06	Anaeromyxobacter dehalogenans 2CP-1	_ response regulator receiver protein _	63	ILLVDDDIAEISAVKRVLLRAGHAPALATSAADALAALEGAAPDLVVLAAACDGGEALALARRVAEDAATAHVPMIIVGEAD
220917679	2.49298e+06	Anaeromyxobacter dehalogenans 2CP-1	_ chemotaxis protein CheB _	6	VLVVDDSAVVRNVFQQELSADPEIEVVGTAPDPFAARDLILERSPDVITLDVEMPRMDGLTFLHKIMRYRPTPVIVVSSLTPAGGALALEALAAGACDVMCKPG
220917873	2.49318e+06	Anaeromyxobacter dehalogenans 2CP-1	_ chemotaxis protein CheB _	6	VLVVEDMPTARQLLVGILSADPELEVVGQASDGAEALALVRALRPDAITMDVMMMPMDGIQATAQIMAERPTPIVIVTSLDVNEVTLSMKALAAGALAALPKPR
220918013	2.49332e+06	Anaeromyxobacter dehalogenans 2CP-1	_ chemotaxis protein CheB _	6	VLVVDDSAASRDELVRMLHGADGLVVAGTAADGEQGLAEALRLAPDVVVLDLQMPRMDGFSFLRLLMARRPTPVVVLSSQSRRADVFKALELGALDFVARP
220915744	2.49105e+06	Anaeromyxobacter dehalogenans 2CP-1	_ chemotaxis protein CheB _	6	ILVVDDSAVVRMALSQILGRAGLEVETAIDPLVAMEKMRRARPDAIVLDIEMPRMDGLTFLDRVMAQDPVPVVVCSGLAGPGSEVALHALEHGAVDVIEKP
220915758	2.49106e+06	Anaeromyxobacter dehalogenans 2CP-1	_ chemotaxis protein CheB _	6	VLVADDSELFRELLARVVAAEPGFEVAAVAADGDAAAAMARALRPDVVTMDLHMPDADGYSGIARIMAETPTPILVLTANPTEAAGFRALSLGALDILEKPSATADL
220917669	2.49297e+06	Anaeromyxobacter dehalogenans 2CP-1	_ chemotaxis protein CheB _	6	VLVVDDSALVRETLTAVLASDAGIEVIGAAGDPYAAVERMRRQAPDVITLDIEMPRMDGLTFLRRLMAQHPIPVVICSSLATAGAEPALRALECGAVDVVAKP
220919355	2.49466e+06	Anaeromyxobacter dehalogenans 2CP-1	_ GAF sensor hybrid histidine kinase _	71	VLLADDDMRNLFAIHSVLETAHVKVIHAQNGREALEVLEASPQVDLVLMDTMMPEMDGLTAIRAIRAQARYRALPIVSLTAKAMTGDRDDALAAGATDYVAKPVDPQRLLS
220917728	2.49303e+06	Anaeromyxobacter dehalogenans 2CP-1	_ two component sigma-54 specific Fis family transcriptional regulator _	82	ILVVDDEQNARVALRTILSEEGYEIAEAADGEEALALLPGFAPAAVLADVRMPRMDGINLLRRAREQGSDAVFVMMTAFASVEAAVEAMRAGAENYLVKPLDVNAVL
220915978	2.49128e+06	Anaeromyxobacter dehalogenans 2CP-1	_ two component sigma-54 specific Fis family transcriptional regulator _	82	ILVIDGNPLDGAGLRAALCERGFDAVEAASAERALGLVPSFQPAAVLADVTLPGCEAGELVGRLRELGSDAAVVVAAPHDRLEAAVQALRAGAESFLVRPVDAGQ
220915240	2.49054e+06	Anaeromyxobacter dehalogenans 2CP-1	_ response regulator receiver protein _	8	ILVAEDDPAVARLYTAYAQSRGHTVLVAHDGAEAFSAAADQGPDLILLDVAMPKVDGRDALRRLKADPRTQGIPVLVISAHGSDQNLRELMLGLGAWDVMEKPVDL
220916035	2.49134e+06	Anaeromyxobacter dehalogenans 2CP-1	_ response regulator receiver protein _	8	LVVDDEPEIRQLVQRTLESRGWAVELATDGEEALARADALLPDVVLLDAMLPRLHGFEACRRLRSSPRTRNVPVVMMTAIYRGWRFAEDARENYGAVDYVEKPFRLDDLARRV
220915718	2.49102e+06	Anaeromyxobacter dehalogenans 2CP-1	_ response regulator receiver protein _	8	ILVADPDPATVRALAPVLRQRGYQVHAARDGSRALQAAILRFPDLILLDEDCPLLDARSFVRILRTNPRTERIPVVITGVSSDPDRSRLGLYLRKPFNLDEVLARV
220918915	2.49422e+06	Anaeromyxobacter dehalogenans 2CP-1	_ response regulator receiver protein _	8	LLLVDGDPKSLRVMEVSLKKAGFTVTTAVNGRDALERCAVSPPDLILSDTKMPEMDGFELCRRLKEDERHRGTPFIFLTGQKSVEYKVKGLELGVEDYLTKPIYIKEIVTRVK
220915757	2.49106e+06	Anaeromyxobacter dehalogenans 2CP-1	_ chemotaxis protein CheA _	96	ILLVDDSAIAREAEAALLRSLGHEVDEAVDGEDGWARLQNGQYHLLVTDVQMPVLDGIDLTRRVKATPRFVKLPIVIMSSLSAPEERRRGVDAGADAYLVKG
56416693	YP	Anaplasma marginale str. St. Maries	_153767.1_ response regulator PleD _	107	IMILDSDKVRSEHMNSVLQEYFQETAVLDNPSQDVNLQNAESYDLFIIDLNFGGDGLRFCSNFRSNNNTRYTPILVLLDESDDIGILSRAFEIGISDYIMAPVDSNELLAR
56416709	153783	Anaplasma marginale str. St. Maries	_ sensory box histidine kinase/response regulator _	36	VLLIEDEDPVRAFTSKALSKRGFRVIDTNSGKAAIETAKSTHIDIVISDVVMPGTSGPETVAEILKIQPNVKVMFVSGYAEEIFHQHKNINLDEMFFLSKPFTLKQLLQKV
56416510	153584	Anaplasma marginale str. St. Maries	_ nitrogen assimilation regulatory protein _	41	VLIVDDEADLRAMVQDILSDDNYVTKISHDGLTAIKLAYEREPDVVLLDIWLKGSDIDGLSVLEKLRYRYPHLPVIVISGHGNIATAVKSLHIGAYDYIEKPFTENRLKL
56416693	153767	Anaplasma marginale str. St. Maries	_ response regulator PleD _	50	ILVVDDLIANVKLLQAKLTKEYYNVLTAMSGEEAIQLAREKHPDLILLDVMMPGMDGYETCRRLRADPATTYIPVVMVTALDNTTDNRVNGISAGADDFLTKPINDVALFSRI
56417080	154154	Anaplasma marginale str. St. Maries	_ transcriptional activator protein _	58	ILLIEDDVACARAVEASLSSEGHFCETMASAQDCYGSIIPKNDDYDVVILDIHFPGKVDGYDILVKLRESGIKVPVLILSCISSVAHKVKGLYYGADDYITKPFHKSELLARIK
88607360	YP	Anaplasma phagocytophilum HZ	_505143.1_ response regulator PleD _	107	ILIIDEDKIRAESINNLLQESFQETTILSDPTQNINFTNAAKYDLLIIDMHFAGDGLRLCSEFRNSNEESRYTSILLLIDESEDTNILHKAFDIGISDYIMVPICNNELVARVN
88607151	505172	Anaplasma phagocytophilum HZ	_ sensor histidine kinase/response regulator _	36	VLLVEDEDPVRAFTSKALSRRGFNVIDTNSGKDAIIAASDNHIDVIISDVVMPGTSGPETVNEVLKIQPNTKVIFVSGYAEEVFHQQHKGIDFNEILFLSKPFTLKQLLQKV
88607673	504819	Anaplasma phagocytophilum HZ	_ nitrogen assimilation regulatory protein _	41	VLIVDDEADLRAMIQDILRDDNYVTRVAADGLSAMKLAYEREPDVVLLDIWLKGSDIDGLSVLEKLKERYPSLPVIMISGHGNIATAVKSLHIGAYDYIEKPFTENRLKL
88607360	505143	Anaplasma phagocytophilum HZ	_ response regulator PleD _	50	ILIVDDLPSNIKLLQAKLTAEYYTVITATSGPEAIRMAEEHQPDLILLDVMMPGMDGYETCKNMRTNPAIAYIPIVMVTALDNTTSNRVNGLSAGADDFLIKPIDDVALFSRI
88607685	505647	Anaplasma phagocytophilum HZ	_ DNA-binding response regulator _	58	ILLIEDDVACAKAVEASLSAEGHFCETMASAQDCYGSIIPKNDDYDVVILDIHFPGKIDGYDILVKLRESGIRVPVLILSCISSVAHKVKGLYYGADDYITKPFHKSELLARIK
212639748	2.31627e+06	Anoxybacillus flavithermus WK1	_ cheY-like receiver domain-containing protein _	12	ILLAEDEEVLRMLVVDTLEDEGHDIDEACDGEEAIEMIKQNEYDLILLDYMMPIYTGLEVIQQVRQMPDKKHVKIMMLSAKSQQADQQRVLDAGADYFMAKPYSPLELVQRIE
212638880	2.3154e+06	Anoxybacillus flavithermus WK1	_ transcriptional regulator of redox response ResD _REC-wHTH_ _	138	ILVVDDEERIRRLLRMYLEREQYVIDEAENGEEALALALENDYDLILLDLMLPGKDGIEVCKQLREKKATPVIMLTAKGEEANRVQGFEAGTDDYIVKPFSPREVVLRV
212639330	2.31585e+06	Anoxybacillus flavithermus WK1	_ cheY-like receiver domain-containing protein _	18	ILIVDDAKFMRMTLANILKKANHEVAGEAENGKEAVDLYIELKPDIVTLDITMPVMSGLEAVREIKRHDPHAKIIMCSAMGQQKMVVEAIEAGALDFIVKPFDESRVMEAI
212639553	2.31607e+06	Anoxybacillus flavithermus WK1	_ chemotaxis response regulator cheY _	18	ILIVDDAAFMRMMIKDILTKNGHEVVAEAADGAQAVEKYKEFRPDLVTMDITMPEMDGITALKEIKKIDSNAKVIMCSAMGQQAMVIDAIQAGAKDFIVKPFQADRVIEAIN
212639752	YP	Anoxybacillus flavithermus WK1	_002316272.1_ signal transduction diguanylate cyclase _	1	VAIVDDDAIVRAIVADIVQKMFAKEKMALDLRTFRDGEQFMTSEWHQGKEPCLVILDGVMPKMDGLEVLQQLRNQKDSSRYKVIMLTARKSENDIARALELGADDYMTKPFKLLELEARI
212640658	2.31718e+06	Anoxybacillus flavithermus WK1	_ OmpR family DNA-binding response regulator _	1	ILVVDDEKPIADILQFNLRKEGYDVHCAYDGVEALQKVEDIQPDLILLDIMLPQKDGMEVCREIRKKYDMPIIMLTAKDSEIDKVLGLELGADDYVTKPFSTRELLARVK
212639803	2.31632e+06	Anoxybacillus flavithermus WK1	_ OmpR family transcriptional regulator _REC-wHTH_ _	1	ILIVDDEKEMRELLRLYLEPEGFTCIEADDGEAGLAEFGRKQIDLILLDIMMPKLDGYRFCMHVRERSQVPIIFLTARSDEWDRVYGLQIGADDYIVKPFSPNEVVARV
212638357	2.31488e+06	Anoxybacillus flavithermus WK1	_ OmpR family DNA-binding response regulator _	1	VLVVDDEQSIVTLLEYNLKQAGFIVLTAYDGEEGLHKALEERPDFIILDLMLPKLDGIEVCKQLRQQKVMTPILMLTAKDDEFDKVLGLELGADDYMTKPFSPREVVARVK
212639753	2.31627e+06	Anoxybacillus flavithermus WK1	_ chemotaxis protein cheV _cheW-REC domains_ _	22	IVAEDSPLLRKLLHDTLAEAGYVYVEFFENGEDAFNYLQAIVQKGKPVESEVQLVITDIEMPQMDGHHLTKRIREDDKLKHLPVIIFSSLITDDLRHKGERVGATAQVSKPEIAELVQMI
212638021	2.31454e+06	Anoxybacillus flavithermus WK1	_ NarL family DNA-binding response regulator _	2	VLLVDDHEMVRLGVSAYLSAQPDMEVIGEAESGEKGVELALQLRPDMILMDLVMEPMDGIEATKQIISAWPEAKIMIVTSFLDDDKVYPAIEAGAVSYMLKTSKASEIANAI
212640627	2.31715e+06	Anoxybacillus flavithermus WK1	_ NarL family DNA-binding response regulator _	2	VLLVDDHALMIEGVKELLGREEDMHVVGTVLHLSQLQESIETLNPHVIVMDIRLKDGNGLEWTKKMKMLYPDCKVVILSGYNYSEYIRAAKHAGASAFVVKEESILQLANAI
212640439	2.31696e+06	Anoxybacillus flavithermus WK1	_ NarL family DNA-binding response regulator _	2	VLLIEDDKDWIQIISEELNCYQDIKIIGIAHCSEEALKAINKKDVDVVLMDIFLQDNCDGIELTAQLLEMKKEIKIIMLTSSDEDTIIFHAYTAGAIDYVVKSEFHEIIDAI
212640294	2.31681e+06	Anoxybacillus flavithermus WK1	_ NarL family DNA-binding response regulator _	2	LLIDSDPIYLLGVEKLLENESNITVVGSVSCIDSLETLIHMYAPDVIVINVHMHIIKALGWIKNVKETYPTINVIMLCNYPPLALSAHEAGVSVVLSKEK
212639144	2.31566e+06	Anoxybacillus flavithermus WK1	_ DNA-binding response regulator _	34	LLIADDEPLEREGLQLMIERAFPHTFTIFHAEHGRSAIQQVEQHRPHIIFMDMKMPGIQGLEAIAEIRKMDAQAKIVILTAYDYFTYAKEAISFGVSEYVLKPAKKQQMIDLL
212640416	2.31694e+06	Anoxybacillus flavithermus WK1	_ NarL family DNA-binding response regulator _	3	IVLIDDHKLFREGIKRILDFEQDFEVVAEGSDGDEALALVERYKPDVVIMDINMPHVNGVEATRQLIEAYPDTKVIILSIHDDESYVMHALQTGAMGYLLKEMDADALIEAVR
212638135	2.31466e+06	Anoxybacillus flavithermus WK1	_ NarL family DNA-binding response regulator _	3	VLIVDDHDLIRKGIRLLLEGFSDVEVVGEASNGCDAITLALKYHPDVILLDLSMPTGLDGFTTAKTIMDELEDVKIIVLTMHDEEIYVQKAIQYNIHGYLLKNSQTNDLHEAL
212638396	2.31492e+06	Anoxybacillus flavithermus WK1	_ NarL family DNA-binding response regulator _	3	ILIVDDHRLVCEGTKNVLEREGDFQVDIVTSASEAEQIVEQRAYDVCLLDWCMPDMSGIELGKRILQKQPNAKIVIYIGYDVVPFLNYFVEFGITGFVSKTASSEQLVTAIR
212639747	2.31627e+06	Anoxybacillus flavithermus WK1	_ Hybrid signal transduction histidine kinase _	55	VIIVEDDEHLAALLEAELKDSGFRVKHVKEGKEAIALIEKEKPDAVVLDIMLEKQDTSGWDVLKALKQNEQLSDIPIIISSALEEREKGMALGATSYLVKPYQPSQLSKTI
212639544	2.31606e+06	Anoxybacillus flavithermus WK1	_ chemotaxis-specific methylesterase _	6	VLVVDDSAFMRKLISDFLSEHPRLHVVGTARDGQEALQKIEQLNPDVVTLDVEMPVMNGLETLKHIMQKKPLPVVMISSTTTEGAENTILSLQYGAVDFIAKPSG
212638794	2.31531e+06	Anoxybacillus flavithermus WK1	_ stage 0 sporulation regulator Spo0A _	76	VCIADDNRELVHLLEEYITSQGDMEVIGVAYNGQDCLQLLRDRDPDVLVLDIIMPHLDGLAVLEKLRIIKQPLPNVIMLTAFGQEDVTKKAVELGASYFILKPFDIEHLVNQI
212640548	2.31707e+06	Anoxybacillus flavithermus WK1	_ sporulation regulator Spo0F _stand-alone reciever domain_ _	82	ILIVDDQFGIRILLNEVFKKEGYETYQAANGVQALDLFAKHSPHLVLLDMKIPGMDGVEILKKMKEMNENVKVIVMTAYGELDMIHETKKLGALTHFAKPFDIDDLRDAIK
212638130	2.31465e+06	Anoxybacillus flavithermus WK1	_ OmpR family DNA-binding response regulator _	92	VLLAEDDIYLGELIVHLLKKKGVEHVDWVQEGEDAYDYALASFYDVIILDWMLPNGDGVSICQRLRKRGYHGAILMLTAKDAVQDRVEGLEAGADDYLVKPFEIDELMARL
15605840	213217	Aquifex aeolicus VF5	_ transcriptional regulator _PhoB-like_ _	1	IALIEDDKDLAFLVKLNLEREGFEVEHFERATPFFKFISENSVDLILIDIMLPDLDGFRIANFLKSRADLKEIPVIFITAKGEEEDKLKGFELGADDYITKPFSMKELIARVR
15605734	213111	Aquifex aeolicus VF5	_ NtrC family transcriptional regulator _	41	VLVVDDEESITSSLSAILEEEGYHPDTAKTLREAEKKIKELFFPVIVLDVWMPDGDGVNFIDFIKENSPDSVVIVITGHGSVDTAVKAIKKGAYEFLEKPFSVERFLLTI
15606382	213762	Aquifex aeolicus VF5	_ NtrC family transcriptional regulator _	4	VLVIEDDKVFRGLLEEYLSMKGIKVESAERGKEAYKLLSEKHFNVVLLDLLLPDVNGLEILKWIKERSPETEVIVITGHGTIKTAVEAMKMGAYDFLTKPCMLEEIELTI
15605779	213156	Aquifex aeolicus VF5	_ NtrC family transcriptional regulator _	4	ILLVEDDDNLRELLKKKLEEHFVVETAKDGKTAREKLSKNNYDVVLLDIRLPDVDGTELLKEFSTSGVKFIVITGYGDVKTAVQCVKLGAYDFIQKPFNFELLEVTI
11499068	70302.1	Archaeoglobus fulgidus DSM 4304	_ response regulator _	14	ILLVEDNPDDVFMIKRAFEKAKIINPLDVAKDGEEAISYLQENKPVLILLDLKLPKVSGFEVLKWVKSKERLKRIPVVVLTSSRNGEDINRAYDLGANSYLVKPVRFEDLLN
11499830	71074.1	Archaeoglobus fulgidus DSM 4304	_ response regulator _	18	LLIVDDDDSIREIVKIMLKDYDIIEASNGEEAVRAYKMFKPDLVLMDIQMPKMDGVEATREILKIDPHAKIVGLTAFARSRGREMLKIGALEVVEKPFTRRTLKELI
11499482	70723.1	Archaeoglobus fulgidus DSM 4304	_ response regulator _	18	VMVVDDEIAMREILKIMLKDYKVIEASNGREAVELYREERPDIVLMDVMMPLMNGIEATSEIKKIDPDAKIVAITAYASSKGEKVIEAGADYILKKPFTRKEVVELI
11498668	69896.1	Archaeoglobus fulgidus DSM 4304	_ response regulator _	18	ILVVDDDCSICELYKEILGSFEVVSACSGREGLELYRKLMPDLVIVDINMPDISGVEVAKEIFKLNPEAVVIVVTAYYQEFESKMLRLGAKEVLGKPFNLKHFRE
11498855	70084.1	Archaeoglobus fulgidus DSM 4304	_ response regulator _	18	VMIVEDDLAVLEALKLMLEDYYEVIVALNGREAIALYEKFRPDIVLMDISMPEVDGVEATKAILQKDPKAVILCVTAFAAHRGQEILDAGAREIIEKPFTRKYLLDRI
11498061	69285.1	Archaeoglobus fulgidus DSM 4304	_ response regulator _	18	VMVVEDDSAVLETVQIMLGDKYEIIPATNGEEAVKKYKMFKPDVVLMDVMMPVMDGVEATKEIKKIDPQAKIIGLTAYARKKGKELLDAGALEVVEKPFTRRQLIEVI
11498980	70213.1	Archaeoglobus fulgidus DSM 4304	_ response regulator _	18	VLIVEDDAAILEAVQLMISDRYNLLTATNGEEAVRLYKMFKPDIVLMDIAMPVMDGVEAAKEIKKFDPDAKIIGITAYARRRGQELLDAGALEILEKPFTRKKLLETI
11498647	69875.1	Archaeoglobus fulgidus DSM 4304	_ chemotaxis protein CheY _	18	VLIVDDTAFMRKLLRNILFSGGFDIAGEAENGKQAVEMYKQLKPDIVTMDIVMPEMNGIEALKAIKKIDPSAKVVMCTAVGQEQMVKAAIKLGAKGYIVKPFQAPKVIEEL
11499067	70301.1	Archaeoglobus fulgidus DSM 4304	_ signal-transducing histidine kinase _	48	ILIADDNPDDRILAVRELKKEFADLEVVEILSKEDLEKALENFNFDAVITDYRLRWGTGFDVLKAVKQVSPFTPVIMLTLTGDEEIAVEAMKEGFDDYVLKS
11498646	69874.1	Archaeoglobus fulgidus DSM 4304	_ chemotaxis-specific methylesterase _	6	VLVVDDSALVRMAVTDILTKAGIEVVDTAKNGREAVEKALKLKPDVITLDINMPEMDGLTALKLIMEKQPTPVVMLSSLTKEGARETLEALKIGAVDFVTKP
157737045	1.48973e+06	Arcobacter butzleri RM4018	_ two-component sensor histidine kinase _	0	ILVVDDIKENRDLIVQLLSFYGFKTLEANSGLMALEVFEKQNENEKIDLIFMDILMEDLDGLETIRIIREKQNGINIPIIALSANVFEDDKKQAIKAGANDFLPKPVEEKEILQIL
157738519	1.4912e+06	Arcobacter butzleri RM4018	_ two-component response regulator _	132	VLLIEDDKDMQKLIVEYLKEYDFDCVAFDQPKDVLEHFKIDNNYSIIILDLMLPEMDGFDLFKKLKQIKDIPIVISSARGDIGNKIHGFELGADDYLAKPYEPRELVLRI
157736675	1.48936e+06	Arcobacter butzleri RM4018	_ two-component response regulator _	140	AMIEDDLELAEVLCQYLKQFNIEVTNYEEPYLALSALKMNKYDLIILDLTLPGMDGLDVCKEIVKSFNIPIIISSARSDITDKVTALKLGADDYLPKPYDPRELEVRI
157738301	1.49099e+06	Arcobacter butzleri RM4018	_ two-component response regulator _	140	IEDDLELAQIITDYLKSFDIEITNTDSPYNGLSMLNVHKDYQLIILDLTLPEIDGLELIPKIREKSNIPIIISSARDDILDKVMGLERGADDYLPKPYNPRELQARIK
157737043	1.48973e+06	Arcobacter butzleri RM4018	_ two-component response regulator _	154	IFLLEDDFALNKIIKISLQNRGFFVDSFSDGYKAVDVILNSKYDLYILDLNVLGFDGHKILEFIRKDDLTVPIIMISAEIDIENIKKSYTLGCNDYIKKPFDFEELFLRI
157736398	1.48908e+06	Arcobacter butzleri RM4018	_ two-component response regulator _	169	KDYDVILLSTSLPTALCKEITKKYSHKSIILLLVSYVSDETVTNHIKDGARDYIMKPFIMDELIRKI
157737533	1.49022e+06	Arcobacter butzleri RM4018	_ two component system transcriptional regulatory protein _	19	QIIEDDKSVKKLLEIAFKEFEFEFISSENKKNALLMFLSHNPNLLVVDLGLPDGDGKDLIKQIREISKVPIIVLTARHDEKEIIAALDVGADDYITKPFSVNELLARI
157736363	1.48905e+06	Arcobacter butzleri RM4018	_ two-component response regulator _	1	ILIIEDEEDILELLEYTLQKEGYETIGFLSIDKNVKKVLDEEQIDLILMDRNLPNIEGTTFINEIKKEGYVNPVIYLTAKDKDEDILEGFESYADDYITKPFNVKELCARVK
157736868	1.48955e+06	Arcobacter butzleri RM4018	_ chemotaxis signal transduction protein CheV _	22	VLAAEDSGVAREVLTKFFQKTGVKYEVYANGGLLISRLEELNPSEVGMVVTDIEMPGTDGYQVASFIKNNSKYSHIPVVVNSSMTTDAVRGKMNQIGVDGFVGKTDISTLYD
157737430	1.49011e+06	Arcobacter butzleri RM4018	_ chemotaxis protein CheY _	23	LLIVDDSTMLRDMLNYALNEGGYTNVTEAVDGVDGLAKAKATNFDLIITDVNMPNMDGLTLIGELRKLSQYSKTPILVLTTERSDEMKAKGKMAGATGWIVKPFVPDQLLKAVN
157736695	1.48938e+06	Arcobacter butzleri RM4018	_ two-component response regulator _	28	ILIIEDDLKIINFLKKGLEEECYIVDFSTNGDEGLYLASINTYDLILLDIMLPVKNGIEVCKSLRSSNIQTPIIMLTAKDSIEDKIKGLDIGANDYLAKPFSFAELLARI
157736636	1.48932e+06	Arcobacter butzleri RM4018	_ two-component response regulator _	321	ILIIEDEITLNRTLQEGLTDFGYQVDTAENYKDAEYFIDIRNYDLVLTDWMLPDGDGIELCKIVKNRSSRTAVVIISARDDKESEIEALKSGADDFIKKPFDFDILLARI
157736768	1.48945e+06	Arcobacter butzleri RM4018	_ two-component response regulator _	327	ILLLEDELLLNNAISEYLRNIGHMVESFQDGQDVLDNIDSSFDLLILDINVPTVDGFGVLAYLNSKKIHIPTIFISALVDIEDITKAYNLGCREYIKKPFHLGEL
157737410	1.49009e+06	Arcobacter butzleri RM4018	_ two-component response regulator _	33	ILIIEDDSIVALDIKRILNNLEYKVTNIVSNYEDAISSIKYEKPTLVFSDINLGKDKKDGIDIINEIQKNSYISVIYLTAYSDEDTIQRAIKTNPLGYILKPFKKEDIKSTL
157736973	1.48966e+06	Arcobacter butzleri RM4018	_ two-component response regulator _	33	ILIVEDEPILAMAMEVKLKKLGFGVSGIATSPDNAILHTNNNHPDLAIIDINLNASKTGIEVACYMWKNFNIPIIFLTSYYNDKILNQAMEAEPYAYLIKPCKNEELKVAI
157737412	1.4901e+06	Arcobacter butzleri RM4018	_ two-component response regulator _	33	ILIVENESIVALEIKRTLEHFNFEVTDIAFDYKSAISSALSNKPDLILVDINLGKGKDGIEVVKKIQTFYDVPIIYLTAFCEDKIINKAIKTKPVSYLIKPFKREELKSNI
157736305	1.48899e+06	Arcobacter butzleri RM4018	_ two-component response regulator _	39	ILLLEDNQKLNETITKRLKMKNYTVISFTDGAEAYEKITEGFSCFILDINVPNVDGINILKKIREFYEIVPVIIISASVELDIIKQSYDFGCNDYLKKPFFIDELEIK
157736679	1.48936e+06	Arcobacter butzleri RM4018	_ two-component response regulator _	4	IAIIDDEVEILNLLSRFLSRNPKFSVANYANPLAALESLNMSSYDIILLDIMMPQMNGLEVLEKIKEKNENQKVIMMTAYSTLDKVLKSHKEGATNYVMKPFDS
157737512	1.4902e+06	Arcobacter butzleri RM4018	_ two-component response regulator _	4	EHFKEVKFASSYEEALKLSLTNNYDLAIVDIDLDDSSFAELSSKLVVLPKIVISSSDSDDKVTTAINLEAYTFLAKPLKVIDLKLAI
157736331	1.48901e+06	Arcobacter butzleri RM4018	_ two-component response regulator _	53	ILLLEDDLILNEIIEEYLISQEHEVITAFSGNEAQDYLYSQTFDLLILDVNVPFVSGFELLKELRTQNIKTPTIFITSLNMVEDMQKGFDSGCDDYLKKPFELKELDLRI
157737329	1.49001e+06	Arcobacter butzleri RM4018	_ two-component response regulator _	53	ILVLEDDELFASTLEDFLIEEKFVIDIAKDGEECLSLNYENNYDLYIFDIKVPKISGLELLASLRNSEDNTPTIFLTSYKDKDTLQEAFVKGCDDYLKKPVDLDELLLRI
157737082	1.48977e+06	Arcobacter butzleri RM4018	_ two-component response regulator _	5	VLIVDDENLALGRLKRVLNDNNVFDIVEFNDPLEAIKEISKTKFDVAFLDISMPNFSGLELAELILKLEPKTFIVFQTAYEEYALDAFKKGGMGYLLKPVEDSELKKIL
157737600	1.49028e+06	Arcobacter butzleri RM4018	_ response regulator receiver domain-containing protein _	61	VLVTDDSKMARKMVVRSLEESTIKDLEIFEAQNGQEAIDLYKEISPKIVFLDLTMPIMDGFEALKKIKEIDENAKVVIISADIQKLSMDRVRELGAFNFIKKPIDALKMQQI
157737434	1.49012e+06	Arcobacter butzleri RM4018	_ protein-glutamate methylesterase CheB _	6	VLVIDDSASMRSILKDMINSIEDFEVIAVATDAYDAREKIKEYEPDLVTIDINMPKMDGVTFLRNLMRLHPMPAVVISGESVRGNDIFDDGAVGFIPKPNS
157738175	1.49086e+06	Arcobacter butzleri RM4018	_ chemotaxis protein CheY _	7	ILIVDDSSTMRRIIANVVMQLGFTKENFDEAEDGLKAWKLLSEGHYDVILTDWNMPNMNGLELVKKVRAEGTHQKTPIIMITTEGGKGEVITALKAGVNNYIVKPFNAEVLKEKL
157737961	YP	Arcobacter butzleri RM4018	_001490645.1_ response regulator receiver _	82	ILIVEDSFIVREQLKDILTNRNYKVLEAKDENDALKIVTLNKIDLILLDLELEKSNGYDFLIKNKKLILEQLNIKVVIITGNISPTIIRDSFRLGVKEIIKKPFMIEELVL
157737961	1.49065e+06	Arcobacter butzleri RM4018	_ response regulator receiver _	84	ILIIEDSTSMIKIIDNIFQKNGFNTFLSLTLENARKIITSNHIDYIILDINLPDGNGYEIIKELSSSIKIIVLTSQTDSQLREASYQKGVIDFINKD
157736624	1.48931e+06	Arcobacter butzleri RM4018	_ two-component response regulator _	85	VLYVEDENGIRSNIEEILKHLFKEVLSATDVNEAYNKYLQNKPDLIITDIKMKDKTGIELLKKIRETDSKIRIIITSAYTDLDYLLEATELHLIKYIVKPITNDKLMEAL
157737816	1.4905e+06	Arcobacter butzleri RM4018	_ two-component response regulator _	85	ILCVEDEDGIRQTIVNTLNYYFKDVYEATNGNEGFELYEYYKPKIVITDIQMRDGNGLELVKQIRENDTETMIIMLTAYSNEEYLMELINLNINYYILKPLNLKKLFEAL
157737283	1.48997e+06	Arcobacter butzleri RM4018	_ two-component response regulator _	85	ILFVEDDLEIQKNMSKILSLLCNKVYVASNGLEAYEIFTNNVIHIIITDYEMPFINGYDLVLKIREISQNIPIIILSNYTDKEKLLKCIPLNLTSYLEKPIIYEKLLETL
157736881	1.48956e+06	Arcobacter butzleri RM4018	_ two-component response regulator _	85	VLFIEDDNIIKNQISEVLSMLFDEVFTSDNGKDGLELYKLHSPDLIISDIKMPIMDGLSLAEKIRNDDYNTPIILLTNFNEKEYLLNAANLSVDGYILKPFEFNNFITTI
157736798	1.48948e+06	Arcobacter butzleri RM4018	_ EAL/GGDEF domain-containing protein _	85	ILYVEDEKDLREVTHEILKSFTKNQYIAENGQEGLELFKKYEKNIDLIVTDINMPILNGLEMAKEIKNINPNIPIIITTAFSNKEYLLESIDIGIDKYVLKPIDIAKLLQA
157738092	1.49078e+06	Arcobacter butzleri RM4018	_ two-component response regulator _	85	VLFVEDEENIRINAVTYLRRLFEEVYEAKDANEAFEIIDNKKPHIIITDINMPKTNGLEMIRKIRKNDLYTKIIVLSAYTKTEYLLEAIELRLEKYLVKPIRHETI
157736525	1.48921e+06	Arcobacter butzleri RM4018	_ two-component response regulator _	85	IVTLLNKEFKKVFLAANFKEAQNSYKKYSPCIIIIEDTFKDRKMVDYLQEIRKIDMKTAVIILTNNETNLYSLELIELYITKYIITPYKEEVLYSS
157737364	1.49005e+06	Arcobacter butzleri RM4018	_ two-component response regulator _	85	ILFVEDENAIRENYITYLKMFFNEVHEASDGEEAYKFYELHKPDILIVDINIPKINGLELLKKIRQNDMTTKAIIMTAHSDNSFLFEAVTLKLTKYLVKPVNRKDLKDAL
157737994	1.49068e+06	Arcobacter butzleri RM4018	_ two-component response regulator _	85	VLYVEDDDIARENGIEYLENFFDTIYEASNAITALQLYEKYKPQIIITDIQMPKLNGLEFVKRVRQIDKKCQIIVITAFCDKDYLLQAIELQLVKYLVKPVNEKDFEEAL
157736372	1.48906e+06	Arcobacter butzleri RM4018	_ two-component response regulator _	85	ILYIEDDDGVRNINSRFLNRMFNELYEAKDGEEGYALYKKYHPDIILTDIKMPKLDGISLTKKIRQKDKTTKIIISTAFSEKEYLIDAIELNIEKYIIKPLTSRNLMPA
157737044	1.48973e+06	Arcobacter butzleri RM4018	_ two component system histidine kinase/response regulator fusion protein _	8	ILIIDDKTENLHYLNTLLKEENYLVRASTDAIFAINSSKVNPPNLILLDIKMPNLDGFEVCKLLKNEENLKDIPIIFISALDDVQSKIKAFENGGVDYITKPFEKEEVLARIK
56478892	160481	Aromatoleum aromaticum EbN1	_ sensory transduction histidine kinase _	0	ILVAEDDPINKKVILEQLALLGHAAEIAGDGAEALEMWRRGTYALILTDLHMPKMDGYRLTEAIRQAEGEAARIPIVALTANALQSESRRAREAGMDEYLTKPVRLEVLGA
56476560	158149	Aromatoleum aromaticum EbN1	_ two component response regulator _	10	ILIVEDEPKTGDYLRQGLAEAGFVVDLARDGLDGLHLALDGDYDLMVLDVMLPSLDGWGVLQTVRRSGRDMPVLFLTARDQVEDRVRGLELGADDYLVKPFAFSELLARVR
56479148	160737	Aromatoleum aromaticum EbN1	_ osmolarity response regulator _	11	VLLVDDDARLRDLLSRYLQEQGFTVKAVVDAPSMDRALHREHFDLMVLDLMLPGEDGLTICRRLRADENAMPIIMLTAKGDDVDRIIGLEMGADDYLAKPFNPRELVARI
56477968	159557	Aromatoleum aromaticum EbN1	_ DNA-binding response regulator OmpR _	11	ILIVDDDKEIRSLLADYLEKQGLRCTTAADGREMKAALERHRVDLIVLDIMMPGEDGLTLCRNLRAGAGAHANLPVLMLTARGEDMDRIVGLEMGADDYLPKPFVPRELYARI
56479285	160874	Aromatoleum aromaticum EbN1	_ response regulator _	11	ILIVDDEPGVREVLEEYFVAQGYAALCAANAGDAREIAAGSPVDVALVDISMPGEDGLSLTRYLREHYARIAIVMLTSAGTVVDRIVGLEMGADDYVSKPFDPRELLARVK
56477139	158728	Aromatoleum aromaticum EbN1	_ phosphate regulon transcriptional regulatory protein phoB _	12	ILLVEDELAIQELIAASLSRAGHRVVRASDAEEAAQRLRDALPDLVLLDWMLPGMTGIEFARRLRGDERTREIPIIMLTARGEEQDKVAGLESGADDYITKPFSPRELAARI
56479001	160590	Aromatoleum aromaticum EbN1	_ DNA-binding response regulator _	13	VLLVEDDASLGEGILTSLKPEGYTVDWVRDGSSALHALTHESFGLAVLDLGLPRLDGLEVLRQLRAAENPTPVLVLTARDTIADRIAGLDAGADDYLVKPFDVAELKARL
56479091	160680	Aromatoleum aromaticum EbN1	_ response regulator _	14	ILLVEDNPDDEALMLRAFSKNSIRNPVVVAHDGVEAIDYLFGTGSYQGRDLSLMPVVVLLDLKLPRMDGLEVLRRMRADEHTGLLPVVILTTSRERQDIHEAYRLGANSYIRKPVDFERFIHAV
56477117	158706	Aromatoleum aromaticum EbN1	_ putative two component response regulator _	14	ILLVEDNTVDLDLALRAFARRDRTSPLAIEVARDGEEALAFLPRWESGHPTPAVILLDNKLPRVSGLDVLRKLKTHERFRRIPVVMLTSSTEDEDVRTAYAAGVNSYIVKPIEFGKFI
56479372	160961	Aromatoleum aromaticum EbN1	_ putative sigma-54 interacting response regulator _	156	VLLVDDDPESLGWLTEFIKGEGYSVATADSLRAARIHLTRSTPDVVLTDLMLPDGLGIELVGELESRDTTEVVLITGHASVETAIDALRSGATDYLVKPVDIERLRG
56479052	160641	Aromatoleum aromaticum EbN1	_ complex sensory protein _	15	LLLVDDEPSIQSALRRVLRSEGYILLFAGNAAEALDLLAKHAVGVVMSDFRIPGMDGIQLLDRVKTLYPDTVRLVLSGYSDIGTLTDAIDRGSIFRFLHKPWDDRELLQSV
56477523	159112	Aromatoleum aromaticum EbN1	_ flp pilus assembly protein, ATPase _	162	ILSDNHDSAERLRATLAQAGKSMDVAVGHATSSEPLGAVNGTVPDVVVLDAFRPANLGALEQLTLRYPQIEPIVITADTSSDFLLQAFRAGVREVLPISPSPEALHAAL
56477376	158965	Aromatoleum aromaticum EbN1	_ putative sensory box histidine kinase/response regulator _	16	VLLVEDDPEVRTVVRKQLAALGCSVLEAENGQEAADIVENVAAISLVLSDVVMPGGLDGCGLTRFIRRFRPGLPVILMSGYVDRADAVTRDLGVPLLAKPFSKERLSAML
56477555	159144	Aromatoleum aromaticum EbN1	_ sensory box histidine kinase/response regulator,C-terminal part _	16	VLLVEDDSEVRRVIRLQLTALGHSVIEAADGVEAWSLIESVPEIAVLVTDTVMPGAIGGRELVARSRALRPRLPILMITGYASDNALAGTAQLDVPVLRKPFDQNTLAT
56477554	159143	Aromatoleum aromaticum EbN1	_ DNA-binding response regulator _	1	ILVLEDEADIARLICGALADYGFRSEHVATGRELLARARKASPDLVIVDLGLPDMDGMQVVRELQDGSPCAVLILTGRNDVTDRVLGLELGADDYLVKPFEPRELVARVR
56477377	158966	Aromatoleum aromaticum EbN1	_ DNA-binding response regulator _	1	IHVVEDDPAVARLMAQTLEKFGFEAQFFATGADFLRRLDSDPPRLCVLDLGLPDMDGLDILSHVRARHGFGLLIVTGRGDIHDRVTGLELGADDYMVKPFEPREFIARV
56479487	161076	Aromatoleum aromaticum EbN1	_ two component response regulator _	20	ILVVEDEPTLAAQLVEALAAAGYAVDRADNGRDAHFIGDVEPLDAVVLDLGLPLMDGITVLKKWRAAGRTMPVLILTARDNWHEKVAGIDAGADDYLTKPFHMEELLARL
56477307	158896	Aromatoleum aromaticum EbN1	_ DNA-binding response regulator ColR _	212	ILVIEDNRDILVNVLDYLQLKGYIVDCAQDGLSGLHLAVTEQYDLIVLDIMLPGVDGYQVCKRLREDAGRDTPIIMLTARDALDDRLRGLNAGADDYLIKPFALSELVARI
56477577	159166	Aromatoleum aromaticum EbN1	_ putative two-component response regulator _	21	ILIVEDHALVREALAHTLARLGEGVECVEAKGSEEALAQLEESADWDLAVIDLMLPDLNGFGLLAVLARRFPDVPAIVVSALDDSATIRRAMRGGASGFVSKASSGEVLRSAV
56476382	157971	Aromatoleum aromaticum EbN1	_ type IV pilus response regulator PilH _	228	ILVVDDSPTERFALTELLSARGYQVVTAENGEDAIAKSKSEMPDLILMDVVMPGINGYQATRMIARSESTRSIPIIICTSKGLETDRIWGMRQGAHDYLVKPVDGAELLVRI
56477575	159164	Aromatoleum aromaticum EbN1	_ complex two-component hybrid sensor protein _	24	VALVDDDPLAQSGMRSLLTSWGCEVTAGSDIESVLETLARSGHEPQLIISDYRLHGNSNGIDAIRVTRARYGENLPAALISGDTAPETLRLAQGESLALLHKPVRPARLRALL
56477767	159356	Aromatoleum aromaticum EbN1	_ nitrogen assimilation response regulator _	29	VWIVDDDRSIRWVIEKALSRENISHRSFASAGEALTALETAPHPPKVLVSDIRMPGESGLGLLQRVKTLHPHLPVIIMTAYSDLESAVSAFQGGAFEYLPKPFDVDQAVALV
56479027	160616	Aromatoleum aromaticum EbN1	_ nitrate/nitrite response regulator _	2	VLLVDDHALFRSGIKSLLQRHAEFEIVGEAGDGMEGVKRAGQLKPDVVLLDLHMPGLSGRDAAAMMAEEAPNSHVLMLTVSEDAEDLIETLRAGACGYLLKNIEADALIAAIN
56477537	159126	Aromatoleum aromaticum EbN1	_ putative response regulator _	2	VFLVDDHRTTLWGLERLITGAERMQLVGSATSIMELLVDPESRNADVIVLDLDLGGVDSAAALAELHQTLSARVLVLTGARDADAHRRVVMAGARGVVRKEEPVDVLLRAI
56477116	158705	Aromatoleum aromaticum EbN1	_ diguanylate cyclase/phosphodiesterase domain-containing protein _	385	VLYIEDSETDADLARRRLAQRAPEIALEVVTTLQRGLSRLTAQPPPFDVVLSDLHLPDGTGLDLLAHVRLNHLPVAVVVLTGAGNHEAAMAALKAGADAYQVKRA
56476059	157648	Aromatoleum aromaticum EbN1	_ two-component response regulatory protein _	39	ILLAEDDQVIANGLGRALKRSGYAVDHVASGSEADTALATQTYDLLILDLGLPKLPGIDVLKRLRARKSALPVLILTAQDGVEERVRGLDAGADDYLTKPFALPELEARV
56479349	160938	Aromatoleum aromaticum EbN1	_ LuxR family DNA-binding response regulator _	3	IVLADDHQMFRHALRAMLEKEPGIRIVGEASNGDELIDLISHQPVDIACVDIGMPGMNGIEATRRLLAIRPHVRVIGLSAFSDRQFVLDLLNAGATGYVTKAEAGEELLRAI
56478683	160272	Aromatoleum aromaticum EbN1	_ two-component system response regulator _	3	LLIVDDHTIFRSGLRRMLSDEADMHVADEASDGASALAKIRSGKFDVILMDINMAGRSGLDTLESLRAERPELPVIMLSMYPEEQYAVLALRARANAYLSKDVEPQELLAAIR
56476749	158338	Aromatoleum aromaticum EbN1	_ two-component response regulator _	3	ILVADDHPIVREGLKTVISMAPDIAVTGEAANGGEVLALIRRKKFDVLLLDMSMPGHDGVDLIKRVRAEQPLLPILVLTMHGEAQLAASALKLGVAGYLTKGKDVESLTNAI
56478702	160291	Aromatoleum aromaticum EbN1	_ two-component response regulator _	3	VLVADDHFLVREGLKMTIAAMQDVEVVAEATNGGEVLAAIKTCNAHVLLLDMSMPGLSGVDLVRRVKSEWPGLPILVLSMYGETQLAAKVLQSGASGYVTKGKGREILLSAI
56477414	159003	Aromatoleum aromaticum EbN1	_ transcriptional regulator NarL _	3	VVIIDDHPLFRKGLIQLLRTVPGFRLVAEAADGKEGIAHILHLRPDLLLLDLNMKDMSGLEVLKFVRQADLDTRVVMVTVSDAAEDLVAALRAGADGYLLKDMEPEQMVEAL
56476381	157970	Aromatoleum aromaticum EbN1	_ type IV pilus response regulator PilG _	45	VMVIDDSNTIRRSAEIFLTHSGCEVLLAEDGFDALAKIADHRPHVIFVDIMMPRLDGYQTCALIKKNPRLSATPVIMLSSKDGLFDRARGRMVGSDEYLTKPFTKDSLLKA
56476385	157974	Aromatoleum aromaticum EbN1	_ pili chemotaxis protein _	47	VMVVDDSLTVRKITGRLLEREGYRVVVAKDGVEALERLLEAVPDAILSDIEMPRMDGFDLLRNIRAHERTRDVPVIMITSRLADKHREYAGRLGANHYLGKPYDENELL
56479365	160954	Aromatoleum aromaticum EbN1	_ ABC transporter ATP-binding protein _	49	VLVVDDNAEIRAQLEALLNRHGALSRSSPSGAAALQGLFALPRSRWPDILVCDVALGDEEDGYEVIRQLRRFEVEHGFGLAERLPAVALSAYRGDHRMRAMLAGFQVCIAKPVDADELVAVI
56479368	160957	Aromatoleum aromaticum EbN1	_ two-component hybrid sensor kinase/response regulator _	49	VLVVDDEADAREVMTLILSQAGAHVRTFSSGTELLAELARPDAVSLPAILLLDIAMPGDSGFSVLQRVRELASLPFIPAVAVTALSRLDRTRFELAGFQECVGKPVEARILIETI
56475964	157553	Aromatoleum aromaticum EbN1	_ sigma-54 dependent DNA-binding response regulator _	4	LLVVDDDHYTRTLIRRLLDKSAEVHVAADGAEARRRFAAEDFNLVLMDQCLPADNGLELLREFRAQRPKMVAILITGFADVRDAVAAVREGLFDYLTKPFEDLEALEA
56478486	160075	Aromatoleum aromaticum EbN1	_ sigma-54 dependent DNA-binding response regulator _	4	ILIVDDEALYRQLLTSRLGRAGYRLSEAADGEAALECAQHGGIDLALVDIKMPGIDGIEVLKRLKELDPLIEVVILTGHGNVDTAISAMKLGAFDYLSKPYKLTEL
56479120	160709	Aromatoleum aromaticum EbN1	_ acetoacetate metabolism regulatory protein atoC _	4	CLIEDDEIIGESLTDRFRLEGFDVDWCRTGVEARAALAAHRHAVVISDIRLPDCNGGELFLDLLASVPMLPPFLFMTAFGSIDRAVELIKAGAADYITKPFDPDALIAKV
56475847	157436	Aromatoleum aromaticum EbN1	_ response regulator receiver protein _	51	VLVVNDDDASLKAVAALLETAAERLRFTIMTARSGEEALRQLLEHEFATILLDVNMPGLDGFETARLIHGRPRSAAIPIIFLTAHRSDELDRIKGYEAGAADYLFTPLVPQVLQAKV
56475846	157435	Aromatoleum aromaticum EbN1	_ complex regulator protein _	55	ILVVEDDHEFAKILQETIRERGFSVLVAESGEKGLELAERELPNAIILDVMLPGIDGWNVMRSLKDNPRTRHIPVHFLTCLEERQKALGMAAIGFATKPVSSDQLNEV
56476049	157638	Aromatoleum aromaticum EbN1	_ putative two-component system, regulatory protein _	5	VVIVDDEEPARARLKDLLDDIADTQPTRVVGVAANGLEALRLIEDLATDVVLADIRMPVMDGVELARHLGRLECPPAVIFTTAYDEYAVQAFELAATDYLLKPVRAARLAEAL
56475846	YP	Aromatoleum aromaticum EbN1	_157435.1_ complex regulator protein _	67	LLVVEDDQNEAYSIVALLDDKEVEISVAASGREAVDLLASETFDCVVLDLGLPEMSGFDLLDHMQAMERGERIPVVIHSGQELSEDDERRLRRYAESIVIKGAKSPERLINEV
56475846	YP	Aromatoleum aromaticum EbN1	_157435.1_ complex regulator protein _	71	VLLVDDDMRNLFSLSSVLAEKNMVVIEADNGRKALARLEEHPDVSIVLMDIMMPETDGYAAMREIRRNPRFAKLPVIAMTAKAMKGDYEKCLEAGASDYIAKPIDVDKLFSL
56477023	158612	Aromatoleum aromaticum EbN1	_ response regulator receiver _	74	ILIVDDEVGIRELLFEILSDEGHDIVLAENAAAARTARNAARPDLVLLDIWMPDTDGITLLKEWSANGQLTMPVVMMSGHGTIDTAVEATRIGAIDYLEKPIGLQKLLAAVK
56477097	158686	Aromatoleum aromaticum EbN1	_ sigma-54 dependent response regulator _	89	ILVVDDEEDTRSFLERALRPRCGLVEIARDAEQAARLMARLHFDLLILDIALPGKSGLAWLHELREHGFSGDAILVAAEADLDTAIAALRGGASDFILKPFRVDQILNSV
56475563	157152	Aromatoleum aromaticum EbN1	_ response regulator receiver _	8	VLIVHDDHRKRAALRDALELNGFVVDEADSGPSVIGRIARIRPHLLLLDAVPPCIDGFTTCRRLRELPQCGELPVIMITSLDDRQIERAFAVGASDYVIEPLHPHVVVHRV
56475451	157040	Aromatoleum aromaticum EbN1	_ response regulatory protein _	91	LLIVEDDPALQKQMRWAFDAFETVVASDRESAITQLRRHEPAVVTMDLGLPPTPDDGVEGFRLLGEMLALAPDTKVIVLTGQHDRENAVKAVAMGAYDFFGKPFEPELL
56477647	159236	Aromatoleum aromaticum EbN1	_ response regulator PilR _	95	VLVVDDEEDIREVLELSLMRMGLGCDTVGTIADACRLLGDRAYRLCLTDMRLPDGDGIELVAHIQTQQPGLPVAVVTAYGSIETAIRALKAGAFDFVTKPVELKALRELV
56475947	157536	Aromatoleum aromaticum EbN1	_ two-component transcriptional regulator _	99	LLLVDDDTDLLKLLSLRLHASGYRVSTAETAEAALGRIAVERFSLVVSDVRLPDRDGLALFEEIRRTCPVLPVILLTAHGSIPDAVEATSRGVFGYLTKPFDSQALLEKI
56476751	158340	Aromatoleum aromaticum EbN1	_ two-component response regulator _	9	VYLVDDEPNVTRALSWLLDSINVPSRAFGSAYDFIAQLDLSGGPACLVLDLRMPEIGGLELMQKLNETGRSLPVIFLSAHGDIPAAVRAIQLGAMDFLQKPFNPQSFIDAIN
56476467	158056	Aromatoleum aromaticum EbN1	_ two-component response regulator _	9	VFVVDDEESVRHSLNWLLSSIALDVKMYDSAQAFLDADISCSYGCLILDVRMQALSGLQLQEALCARGFSLPIIFLSAYGDAQIGAQAIKKGAIDFLQKPYRNQDLLDAVN
56475502	157091	Aromatoleum aromaticum EbN1	_ two-component response regulator _	9	IYIVDDDEALRDSLVWLLESSGYRAVAFESAEQFLAAYQPAMTGCLVLDVRMPGMSGFELFDELRRQSSTLPVIFITGHGDVPMAVSAVKKGAVDFIEKPFGDRDML
56477164	158753	Aromatoleum aromaticum EbN1	_ transcriptional regulatory protein fixJ _	9	IHVVDDDAAFRRSLVFLLESVGWSVCAYASAEEFLAAHERPPADLGCLVLDIRMPTMSGLELQAALRRRGWQAPIVFITGHGDVELAVEAMKHGASDFLQKPFRDQALLDAV
56477788	159377	Aromatoleum aromaticum EbN1	_ two-component response regulator _	9	IIDDDEAIRDALQWLFKTRDVACTTWPSAEEFLAAVQPDWRGCAVIDIRMEGMSGLECFDALRARGNLLPVVFITGHGDVPMAVAALKKGAFDFIEKPFNDSDLVDVV
119962503	YP	Arthrobacter aurescens TC1	_948930.1_ signal transduction histidine kinase _	0	LLVAEDNEVNQLVARGMANRLGYEVHIVDDGEQAVSAALSGTYAAVLMDCHMPVMDGFDATKAIRARNGHSARIPIIAMTAGALDEDRERCFAAGMDDYISKPVDLAKLAEV
119960910	948727	Arthrobacter aurescens TC1	_ KDP operon transcriptional regulatory _	19	VLIVEDEARIARAMQVTLQANGYQALTVGTGADALQATAKQPVEIVVLDLGLPDMDGVEIIRRIRGWSSMPIIVLSARHASEDKVEALDAGADDYVTKPFGLDELLARL
119962094	949206	Arthrobacter aurescens TC1	_ two-component system response regulator _	1	VVVEDDADIRGLLVLVLEQLDFVVTEAPDGLSGVEAVRRTNAELVTLDINLPDIDGMEVCRRLREFSDAYILMLTARADEIDRLTGLDTGADDYINKPFSPKELQARI
119952783	950374	Arthrobacter aurescens TC1	_ putative two-component system response regulator _	1	VVIEDDEDIRAAVAEIFRQSGFAVHAASSGSEGLERVKEHNPDIVTIDIGLPDFDGLEASRRIRTFSDAYVIIVSGRADEADALMGFEAGADDYITKPFRPRELRARIK
119964131	946861	Arthrobacter aurescens TC1	_ two-component system response regulator _	1	LVIEDDQDIRELVRVVLSQAGFDVHTASTGSAGVTSARELNPDVITLDLGLPDIDGFEVARQIRKSSDAYIIMLTARAEELDTLMGLEAGGDDYLTKPFRPRELRARVE
119961724	947342	Arthrobacter aurescens TC1	_ two-component system response regulator _	1	ILLVEDEQTIADVVRDYLLKAGFQVDMAGDGFTALELAASRQPDLVILDRMLPGLDGVEVCRRLRQTMSVPVIMVTALGTEDDRILGLEMGADDYVTKPFSPRELVLRV
119963579	946689	Arthrobacter aurescens TC1	_ two-component system response regulator _	1	EDEESFSDPLSYLLGKEGFDVEVVDNGSDALVEFDRNGADLVLLDLQLPGTPGTEVCRQLRQRSSVPVIMLTAKDSEIDKVVGLELGADDYVTKPYSSRELVARVR
119962486	946531	Arthrobacter aurescens TC1	_ two-component system response regulator _	1	VLIVEDDDAMASALSAAVASAGHKHTRVSRGEDALLAHRQHEVILLDLGLPDLDGLDVLRKLRQVTQIPILILTARDDERSVVLGLRSGADDYLVKPVKLVELLARI
119963933	949838	Arthrobacter aurescens TC1	_ two-component system response regulator _	2	VLLVDDQPLLRMGFRLILEGEEDVHVVGEASDGIEAVRQVEALQPDVVLMDVRMPGMDGIEATKQITDSGSDARVIILTTFDLDEYAFSGLQAGASAFLLKDVAPSELVHAVR
119960873	948224	Arthrobacter aurescens TC1	_ two-component system response regulator _	2	VALVDDQQLVRSGFGMLINSQPDLEVVAEAGNGIEAVQALSATTADVVLMDVRMPGMDGIEATRRILEQAAAQPTGSQRAEIKIVVLTTFDLDEYALAAIQAGASGFLLKDAPPEELLEAIR
119964358	946356	Arthrobacter aurescens TC1	_ two-component system response regulator _	2	VLLVDDELLAREILRDYLSSDSSIEVVGEASDGRVAVVQAASLRPDVILMDMQMPVMDGVAATAQIHAEFPDIAILGLSTFSTDRYVVDLLRAGASGYLVKDTLPKEITAAI
119963006	946274	Arthrobacter aurescens TC1	_ two-component system response regulator _	2	VLLVDDHTVVRSGLKALLGTQADIAVVGEAASGEEALEAAQEHMPAVVLMDLAMGAGMDGIEAIKQLRQRNPKQAVIVFTTYDSDADIVRAVDAGAMGYLLKDAAPEEIFAAVR
119964172	949850	Arthrobacter aurescens TC1	_ two-component system response regulator _	2	VLLVDDHPVVRAGLRAMLADFPGVTVVAEASEGDAALVELSKLHTLGEPVDLVLMDLQMGSGMDGVTATEKIKAGEGGNPPPPVLILTTYDTDADILAAVEAGASGYMLKDAPPEQIRQAV
119963015	946508	Arthrobacter aurescens TC1	_ two-component system response regulator _	30	IQRTPGFGVVGVAHTGAQALVETQRLQPDLVLLDIHLPDINGLELMHQLRDVAPDLDVLVISAAREVETVRKALRGGIVHYLIKPFSQSDLQERL
119963731	947429	Arthrobacter aurescens TC1	_ two-component response regulator _	30	VLVVEDEPIASDAHSVYVGRLDGFTLVGTAPDGQSALRILGEFAASGSPVDLVLLDMNLPDLHGLDVARRMRSAGVFADIIAITAVRELTIVRSAVSIGVVQYLIKPFTYATFAD
119962861	947218	Arthrobacter aurescens TC1	_ two-component system response regulator _	30	VLIVDDDFHVARLHAAYVDSVAGFMALAPAGSVSQALQAIHSLRPDLVLLDVYLPDGSGLDLLGQLDVDALMLTAASDAQSIRVALRRGALGYMLKPFTAESLSQQL
119963548	946794	Arthrobacter aurescens TC1	_ response regulator of two-component system _	312	LLVVDDEPNIRELLSTSLRFAGFEVVAAANGREALAAADLHSPDLAVLDVMLPDMDGFTVTRRLRAAGKHFPVLFLTAKDDTEDKVTGLTVGGDDYVTKPFSLDEVVARI
119961921	948931	Arthrobacter aurescens TC1	_ response regulator/GGDEF domain-containing protein _	35	ILIADDDQISRMITKAAVEQSGHECIVAVDGDSAWQLYKEHSPEAVVTDLMMPGLNGLDLCRAIRAAEEDRYTYVILVTSHGSRKDVLAGMEAGADDYVTKPLDPFSLH
119960584	948678	Arthrobacter aurescens TC1	_ two-component system response regulator _	3	VVIVDDHTIFRSGLKADLDERINVVGEAGTVEQAIAVIAESRPEVVLLDVHLPGGLGGGGREVIAGSAALLATTSFLALSVSDAAEDVVSVIRAGARGYVTKTISGKEISDAV
119962184	947596	Arthrobacter aurescens TC1	_ two-component system response regulator _	54	VVVAEDETLIRLDIIEILKGEGYDVVGEADNGEKAVQLAEELKPDLVLMDVKMPVMDGISAAEKIVKARIAPVVLLTAFSQKELVERARDAGAMAYVVKPFSPADLIPAI
119963845	947280	Arthrobacter aurescens TC1	_ two-component system regulatory protein _	5	LVADDELPAVEELAFLLGRDERIGAIHRASSGAEALRTLETESVDAVFLDIHMPALSGLDIARAISRSSSPPAVVFVTADEDCALEAFDLAAIDYLLKPLRAERLSRSV
119962503	948930	Arthrobacter aurescens TC1	_ signal transduction histidine kinase _	64	VLVVDDNATNRLVLDTQLASWGMVPVSVADAASALDEYRAAASSSHPYDIAVVDMCMPDTDGLQLARNIKNESNGSGGPGIILLTSTMQVERSDLTSAGIREYLTKPVRSSELYNRL
119962132	946602	Arthrobacter aurescens TC1	_ two-component system response regulator _	93	LVVDDEPSLAELMSMGLRMAGWSVAVAGDGPGAVKLAKDFRPDVLVLDVMLPGFDGVEVLNRIRTFAPEVPALFLTAKDAVQDRIVGLAAGGDDYVTKPFSMEEVLLR
220912826	2.48814e+06	Arthrobacter chlorophenolicus A6	_ LuxR family transcriptional regulator _	100	VFILDDHELVRQGLKDLLEGEGFVVVGESGSAAEATRRIPALRPDISILDGRLPDGTGIEVCRDVRSLDPRLNCLILTSYDDEQAIRGAVLAGAAGYILKQIKSDDLLAG
220912472	2.48778e+06	Arthrobacter chlorophenolicus A6	_ winged helix family two component transcriptional regulator _	19	ILVVDDEPQLLRAMQINLRAEGYAVSVAANGTDALHLAASNPPDVLVLDLGLPDIEGADVIRGIRAWSDLPIVVLSARQGSADKVEALDAGADDYVTKPFGLDELLARL
220912548	2.48786e+06	Arthrobacter chlorophenolicus A6	_ winged helix family two component transcriptional regulator _	19	VLVVDDDPHLLKALRITLAAHGYAVDAASDGASALVAASRHAPDLLILDLGLPDMDGVDVLRDLRRWSTLPVLVLSARHGSADKVGALDAGADDYITKPFGLDELLARL
220913397	2.48871e+06	Arthrobacter chlorophenolicus A6	_ winged helix family two component transcriptional regulator _	1	VVIEDDADVRNLLEGVLSQAGFEVHTANDGRAGVEVVRSKQASVVTLDIGLPDIDGFEVLRRIRHFSNAYVVMLTGRTEEPDLLSALNAGADDYIAKPFRPRELRARV
220911492	2.4868e+06	Arthrobacter chlorophenolicus A6	_ winged helix family two component transcriptional regulator _	1	VLIVEDDDAMAGALAAGVATAGHRTRRVARGADALLAHRDFEVILLDLGLPDMDGLDVLRKLRQITDCPILILTARDDERSVVLGLRSGADDYLVKPVKLVELLARI
220913668	2.48898e+06	Arthrobacter chlorophenolicus A6	_ winged helix family two component transcriptional regulator _	1	VVVEDDKDIQMLLNRTLSMQGFDVVVAGNGMDGLARIREHQPELITLDLNLPDLDGTEVCRRLREFSDAYVVMITARVEEIDELLGLQIGADDFVTKPFSPRSLGARI
220911753	2.48706e+06	Arthrobacter chlorophenolicus A6	_ winged helix family two component transcriptional regulator _	1	LVIEDDHDIRELVRTVLTQAGFDVTVASSGAEGVLVAKTISPDVITLDLGLPDIDGFEVSRQIREFSDAYIVMLTARTEELDTLIGLESGADDYLTKPFRPRELRARV
220914186	2.4895e+06	Arthrobacter chlorophenolicus A6	_ response regulator receiver protein _	1	VVIEDDPDIRGLLVRVLTKQGFIVTEAGEGLTGVEEVRRSQPDLVTLDLNLPDLDGLEVCKLLREFSDAFIVMLTARADELDKLTGLDNGADEYISKPFSPRELQSRI
220913650	2.48896e+06	Arthrobacter chlorophenolicus A6	_ winged helix family two component transcriptional regulator _	1	VVIEDDGAIRASLTEVLRQSGFSVHPTSSGSEGLARVVEHKPDIVTVDIGLPDFDGIEVSRRIRTFSDAYVIIISRRADEADALMGFEAGADDYLIKPFRTRELKARV
220911625	2.48693e+06	Arthrobacter chlorophenolicus A6	_ winged helix family two component transcriptional regulator _	1	ILIVEDEESFSDPLSYLLGKEGFEVEVVDNGLDAITEFDRNGADLVLLDLQLPGQSGTEVCRQLRQRSTVPVIMLTAKDSEIDKVVGLELGADDYVTKPYSSRELVARVR
220913614	2.48892e+06	Arthrobacter chlorophenolicus A6	_ winged helix family two component transcriptional regulator _	28	ILIADDEPRIAAFIAKGLTAAGYTTSSVEDGIRALDYGSSGEFDLLILDIGMPRMDGFGVLSALRAMNCTVPVIVLTARDSLPDTLAALDGGADDYMSKPFRFEELLSRI
220914644	2.48995e+06	Arthrobacter chlorophenolicus A6	_ LuxR family transcriptional regulator _	2	VLLVDDQPLLRMGFRLILEGEDDLHIVGEASDGAEAVKLVRNLTPDVVLMDVRMPVLDGIEATRAITAEGSPARIIILTTFDVDEYAFAGLQAGASAFLLKDVAPSELIQAVR
220913015	2.48832e+06	Arthrobacter chlorophenolicus A6	_ LuxR family transcriptional regulator _	2	VALVDDQQLVRSGFGMLINSQPDLDVVVEAGNGLEALQALGAVAADVVLMDVRMPGMDGIEATRRLMESALAAPAGSARAELRVVVLTTFDLDEYALAAIQAGASGFLLKDAPPEELLEAIR
220914117	2.48943e+06	Arthrobacter chlorophenolicus A6	_ LuxR family transcriptional regulator _	2	VLLVDDHPVVRAGLRAMLAGFEGIAIAAEASDGRAALKELDRLSALGEPPDVVLMDLQMGKGMDGVTATAEIRKLPAPPPVLILTTYDTDADILAAVEAGASGYMLKDAPPEQLRQAV
220911420	2.48673e+06	Arthrobacter chlorophenolicus A6	_ LuxR family transcriptional regulator _	2	VLLVDDHLVVRSGLRALLGTQPDIDVVAEAASGEQALELVRELSPGVVVMDLAMGDGMDGIEAIRRIRGLNSGQAILVFTTYDSDADIVRAVDAGAMGYLLKDAAPEEIFAAVR
220912466	2.48778e+06	Arthrobacter chlorophenolicus A6	_ response regulator receiver protein _	2	VFIVTDHELVRQGLRELFEDEGFEIVGEGSSAAEAIRSAALLQPDIAVLDDRLPDGTGIEVCRALRSRTDPVTCLLLSGYDEDRAARATVLGGASGYVLKQVGDNTELANAV
220913612	2.48892e+06	Arthrobacter chlorophenolicus A6	_ response regulator receiver protein _	2	VLIVDDHTIFSDLLAGALDREPDLKSLGAAKCVESAVTMFRELRPDVVIMDLHLADGSGLHAAQRILSEAPQARVVMLTGNPSQDALREAARMGICGFLPKDGALGLMLDT
220912296	2.48761e+06	Arthrobacter chlorophenolicus A6	_ response regulator receiver and unknown domain-containing protein _	30	VLVVEDEAIASAAHAAYVGRMPGFELAGTAPDGQSALRLLGDFAASGSPVELVLLDMNLPDLHGLDIARRMRAAGLLADIIAITAVRELAVVRSAVAIGVVQYLIKPFTFATFSDKL
220911377	2.48669e+06	Arthrobacter chlorophenolicus A6	_ response regulator receiver and unknown domain-containing protein _	30	VLIVDDDFMVAKVHAGFIQRTAGFTVVGAAHTGAQAVVETQRLQPDLVLLDIHLPDINGLDLMHQLREVAPELDVLVISAAREVETVRKALRGGIVHYLIKPFSQADLQERL
220912116	2.48743e+06	Arthrobacter chlorophenolicus A6	_ response regulator receiver and unknown domain-containing protein _	30	VLIVDDDFHVAKLHAAYVDSVAGFLALAPVGTASLALQAIHSLRPDLVLLDVYLPDASGLDLLQQLDVDTVMLSAASDTASVRVAFRRGALGYLLKPFTADALSQQL
220911674	2.48698e+06	Arthrobacter chlorophenolicus A6	_ winged helix family two component transcriptional regulator _	312	LLVVDDEPNIRELLSTSLRFAGFEVVSAANGRDALAAADAHAPDLAVLDVMLPDMDGFTVTRRLRASGKHFPVLFLTAKDDTEDKVTGLTVGGDDYVTKPFSLDEVVARI
220913455	2.48876e+06	Arthrobacter chlorophenolicus A6	_ LuxR family transcriptional regulator _	3	VVIVDDHAIFRSGLKADLDASIHVVGEAATVEQAIAVIAETRPDVVLLDVHLPGGLGGGGREVIAGSVPLLGTTRFLALSVSDAAEDVVAVIRAGARGYVTKTISGAEITDAV
220912456	2.48777e+06	Arthrobacter chlorophenolicus A6	_ response regulator receiver and ANTAR domain-containing protein _	54	VIVAEDETLIRLDIIEILRGEGYDVIGEADNGEKAVQLAEELKPDLVLMDVKMPVMDGISAAEKIVKARIAPVVLLTAFSQKELVERARDAGAMAYVVKPFTPADLIPAL
220912163	2.48747e+06	Arthrobacter chlorophenolicus A6	_ LytTR family two component transcriptional regulator _	5	VLVVDDELPAVEELAFLLGRDERIGKVLRATSGSEALRALASAQVDAVFLDIHMPAVSGLEIARAIAAGSHPPAVVFVTADEDHALAAFELAAVDYLLKPIRAERLA
220911579	2.48689e+06	Arthrobacter chlorophenolicus A6	_ winged helix family two component transcriptional regulator _	93	LVVDDEPSLSELMSMGLRMAGWSVAVAADGPEAVKLAKDFRPDVLVLDVMLPGFDGVELLGRIRAFAPEVPALFLTAKDAVQDRIVGLAAGGDDYVTKPFSMEEVILRL
119898773	YP	Azoarcus sp. BH72	_933986.1_ putative hybrid sensor and regulator _	0	ILLVEDNDLNQEVAVGLLAGAGFVVEVAENGAVALDLLQAGGPGCYDLVLMDMQMPVMDGVTATGEIRRLPGFDTLPIVAMTANAMASDREKCLAAGMDDHLAKPIDPPALWAAL
119898693	YP	Azoarcus sp. BH72	_933906.1_ putative sensor-regulator protein _	0	VLLVEDNPINQQVATEFLRQAGLQVDLAGDGYEGVDRAVATAYDLILMDVQMPGMDGLEATRRIRARDSHTPIVAMTAHALDTDRERSRAAGMNGHLTKPIDPAELETTL
119900234	YP	Azoarcus sp. BH72	_935447.1_ putative hybrid sensor and regulator protein _	0	ILLAEDNATNQKIARTMLERQGHRVHVAGDGAEALAALVQGDYDLVLMDCRMPEVDGFAATRAIRDGLGGARHAAIPIVAMTADAMEGDRERVLAAGMDDYLTKPIDAARLEATV
119899974	YP	Azoarcus sp. BH72	_935187.1_ putative hybrid sensor and regulator protein _	0	ILLVEDHPVNQLLARQLLEKWGHTVTLAENGQIAVERFPEARWDIVLMDMHMPVMGGEDATRLIRALEPPGQHTPIIAMTASAMPEDRQHCLDAGMDDHLAKPINAQAVH
119900235	935448	Azoarcus sp. BH72	_ putative two component transcriptional regulator _	0	VLVVDDVPVNRKLALAMLKKRGWQAEEVDNGAAALERLSAGGFDGVLLDISMPGMDGEEVCRRIRADGRFAGLRIVAYTAHAMEFEKERILSAGFDSIMIKPITMSALQSAL
119898866	YP	Azoarcus sp. BH72	_934079.1_ putative two-component hybrid sensor and regulator _	0	ILLVEDNPVNQTVASRMLERVGHKVTVVNNGAEAIEAFDAGHFDLVLMDLQMPVMGGIEATQAIRAREARRSWAVQGGWRAVPIVAMTAHAMESDRARCLEAGMDDYVAKPIRAGDLLAAI
119898740	933953	Azoarcus sp. BH72	_ putative two component response regulator _	109	ILAIDDEPANLKLLEKILGSQGYGTCALVQDPREAVARYLEVKPDLILLDINMPHLDGFAVMTQLQALQDPLLPPIVILTAQAGREFLLKALDHGARDFVAKPFDRVELLMRV
119896748	931961	Azoarcus sp. BH72	_ two-component response regulator _	10	ILLVEDDAQQAGYIRKGLQEAGHTVDVAADGRDGLFLATTASFDAIVLDRMLPRVDGLTVLRTLRASRIATPVVVLSALGEVDDRVAGLRAGSDDYLVKPFALSELLARL
119899236	934449	Azoarcus sp. BH72	_ two component response regulator _	10	ILIVEDEPKTGDYLRQGLAEAGFVVDLARDGLDGLHLALGGDYDLVVLDVMLPSLDGWGVLQTVRRAGHEMPVLFLTARDQVEDRVRGLELGADDYLVKPFAFSELLARVR
119899904	935117	Azoarcus sp. BH72	_ DNA-binding response regulator _	11	ILIVDDDPQIRSLLADYLDNFGFACRAVGDATAMRAALAARPADLVILDLMLPGEDGLSLCRTLRAHGDIPIIMLTARAEAADRIVGLELGADDYVVKPFDPRELVARI
119896346	931559	Azoarcus sp. BH72	_ two-component response regulator _	11	VLIVDDDPDIRDLLADYLGKQALQVSAAADGRQMRAALLAGPVDVVVLDLMLPGEDGMALFRWLRETPAHAQIPVVMLTARADDVDRIIGLEMGADDYLGKPFVARELLARV
119899035	934248	Azoarcus sp. BH72	_ DNA-binding response regulator _	11	ILIVDDDRDIRSLLADYLEKQGLRCTTAADGREMKAALERHRVDLIVLDLMLPGEDGLTLCRNLRAGGSHANTPILMLTARGEDMDRIIGLEMGADDYLPKPFVPRELYARVR
119898000	933213	Azoarcus sp. BH72	_ osmolarity response regulator _	11	VLLVDDDARLRELLSRYLQEQGFAVKAVVDAPMMDRALHREHFDLIVLDLMLPGEDGLAICRRLRGAENHIPIIMLTAKGDDVDRIVGLEMGADDYLPKPFNPRELVARIQ
119899975	935188	Azoarcus sp. BH72	_ response regulator _	12	IVIIDDHSVNLTLLRYLLAREAACDPIVFDDPREGLAHCLEHTPDLVIVDYMMPEMSGIELIGHLRAHPPTSEVPVLMVTANNEREVRHAALDAGATDFLTKPIDNKELSSR
119899670	YP	Azoarcus sp. BH72	_934883.1_ signaling protein _	12	HLRFETVSSAEDVLRRLPASGAEPCAVDVLLLDYMLPGLNALDLTKVLRQQRRLDIPIVMVTGQGSEQTAAQALRLGVSDYLVKH
119897735	932948	Azoarcus sp. BH72	_ response regulator _	12	VLVVDDEASIRKLMCAVLEEAGHTVFEAENGRIGLERALDIQPHMMVLDWVMPEMEGLELVRALRATKIGRSIYILLLTNVEDDERLIEAFEVGADDFVTKPVKPRVLAAR
119896456	931669	Azoarcus sp. BH72	_ phosphate regulon transcriptional regulatory protein _	12	ILLVEDEPAIQELIAANLSRAGHHVVRAADAEAAQRLVRDALPDLVLLDWMLPGMSGIDFARRLRAEERTREIPIIMLTARGEEQDKVAGLETGADDYITKPFSPRELVARIK
119896555	931768	Azoarcus sp. BH72	_ transcriptional regulator _	13	ILLVEDDALLGDGLQAGLRLAGFNADWVRSAEAAETALALEHFSAVVLDLGLPGRDGNSLLAALRQRHDDIPVLILTARDAVADKVRGLDLGADDYMVKPVDLDELAARL
119899961	935174	Azoarcus sp. BH72	_ DNA-binding response regulator _	13	LLLIEDDPMIGAAVQRGLRQDGYAVDWVRDGTAGVLALTTPAAGGEAPYDLLLLDLGLPGKDGLAVLAELRGAANTVPVLVLTARDAVADRIRGLDAGADDYLVKPFDLDELGARV
119898300	933513	Azoarcus sp. BH72	_ putative two-component response regulator _	14	ILLVEDNPDDEALTLRAFSKNKITNPIVVARDGVEAIDYLFCTGIHENRDAKVVPAVVLLDLKLPRIDGLEVLRRIRADERTALLPVVVLTTSRELQDIQEAYRLGANSYIRKPVDFERFL
119899671	934884	Azoarcus sp. BH72	_ putative two-component system regulatory protein _	14	ILLVEDNPADLDLTLRAFRRRHLLNPLLVARDGQEALDFIPRWSAGEPLPLVVLLDLKLPKVPGLEVLRTFKANPLTRPVPVVVLTTSDEDADIESAYSLGANSYILKPVDFDKFTQ
119898746	933959	Azoarcus sp. BH72	_ putative two-component response regulator _	14	ILLVEDNAQDEMLILRALKKINVANGVDVVRDGQQALDYLFGEGEFAARAGAPLPAVVLLDIGLPRLSGLEVLAALRARPQTRLMPVVILTSSDEDRDRHSSYENGANSFVRKPLEFGEFAETV
119898103	933316	Azoarcus sp. BH72	_ transcriptional regulator _	156	VLLVDDDPESIGWLSEFIKAEGYTVGSVDSLRAARIHLTRSRPEVILTDLMLPDGQGIELVNEFPAGEAPELVVITGHASVESAIEALRAGATDYLVKPVDVERLRG
119900094	935307	Azoarcus sp. BH72	_ hydrogenase transcriptional regulatory protein _	15	ILVVDDEIRSQEALRRTLEEDFEVFTASGADDAIAILEREWIQIVLCDQRMPGSSGVALLRQVRERWPEAVRIIISGYTDSEDIIAGINEAGIYQYLLKPWQPEQLLLAL
119896427	931640	Azoarcus sp. BH72	_ putative response regulator _	15	ILCVDDEETILTALEMQLDELFDARFIVELAQGAAEAYEVLESYEAGELPLLVIISDWQMPQIKGDEFLIEAHRRFPHVVKIMLSGHADPAAVDNAREHADLYCFLSKPWDKDELRNAI
119896426	931639	Azoarcus sp. BH72	_ putative response regulator _	15	IVCIDDEETILESLSMELAGRFPGVDLELLQDNADAEGLIGSLLAAGVEVPVVVCDYIMPGRRGDAVLAAVHRLAPAARTIMLTGQSNLEGVTHAINHANLYRYIAKPWNKEDLALTL
119896985	932198	Azoarcus sp. BH72	_ putative hybrid sensor and regulator protein _	16	VLLVEDEPAVRQVIRMQLTALGYPVIEAENGVEALSLLENVEDIAILVSDTVMPGGIGGRELAARARRLRPDLPILLITGYASSS
119898349	933562	Azoarcus sp. BH72	_ response regulator _	18	IVVVDDNEVIRMALRALLRQAGFNVVGEGRDGDMALDLAARLQPDLVCLDVMMPKRNGLEALDELRAKFPDIKVLMVTGQTDRDSVGEMVRKGAAGIVVKPFNAARIIELV
119896946	932159	Azoarcus sp. BH72	_ putative two-component sensor histidine kinase _	199	ILTVDNERVDRELLASLLEPLGFEIGQAASGYECLEMVPAFRPHLVFMDLAMPGIDGWETIRRLRDAGFDEVPVAIISANAFDKGLDNDVGIAPEDFILKPIRVEELLD
119899383	934596	Azoarcus sp. BH72	_ two component system transcriptional regulatory protein _	19	ILLVEDELQIRRLVRQVLERAGYRVDEAATRADGLAQAAAQAPDLLLLDLGLPDGDGVGFVRALRDWTRLPVLVLSARSDEQDKIGALDAGADDYLTKPFSVGELLARVR
119899090	934303	Azoarcus sp. BH72	_ two component system transcriptional regulatory protein _	19	VLVVEDEPQIRRLVRNALEGENYRVFTVDSGKRSLIEAGTRKADLIVLDLGLPDLDGMEVLRGIREWSHVPVLILSARGEEDDKIRALDEGADDYLAKPFGVGELLARV
119896995	932208	Azoarcus sp. BH72	_ DNA-binding response regulator CreB _	1	ILIVDDEPAIADMLAYALRTEGYEPDCVGLGGDALAALRGGADYALVILDVGLPDQSGFDVCRALRRESDVPVIFLTARSDEVDRIVGLELGADDYVPKPFSPREVASRV
119896984	932197	Azoarcus sp. BH72	_ DNA-binding response regulator _	1	IFVLEDEPDIARLICSSLTEYGFRCEHLTTGRQLLQRARQQTPDLCIVDLGLPDMDGMQVVRELQDGSPCAVLILTGRNDVTDRVLGLELGADDYIVKPFEPRELVARVR
119899725	934938	Azoarcus sp. BH72	_ LuxR family DNA-binding response regulator _	21	ILIVEDHALVREAMAQTLSRLEPGIDCVEAKGADDALAKLEGAADWDLAIIDLMLPDMNGFSLLAVLAKRFPDIPAIVVSAMDDEASVRRAIKGGASGFVSKASSGDTLLQAVR
119899743	934956	Azoarcus sp. BH72	_ pilus protein _	228	ILVVDDSPTERLALTELLTRHGYQVATAESGEEAITKSKSEKPDLILMDVVMPGMNGYQATRTISRDDATRNIPIIMCTSKGLETDKIWGMRQGAYDYLVKPVEHNELLARIK
119897749	932962	Azoarcus sp. BH72	_ chemotaxis protein CheV-like _	22	VFFADDSSVARKQITQTLDILGVRHVGSVNGRAAWEELKKVAAHADATGRKVKDMVSLVLTDVEMPEMDGYILTKHIKSDPRFEGVPVIMHSSLSGMSNQQLGKSVGVDEYVPKFEPQRLAQTL
119897750	932963	Azoarcus sp. BH72	_ chemotaxis protein CheV-like _	22	VFFVDDSAVARRKISEVLDKLGVRHKHAQNGLEAWTRLEGMASHAQQMGRHVAEEIDLIMVDAEMPEMDGYVLTRNIKNDTRFEGIPVVMHSSLSSDANRAMGKRVGVDSYVAKFDADVLAET
119896702	931915	Azoarcus sp. BH72	_ chemotaxis response regulator _	23	IFLVDDSATILLSISNILSKAGYGVEKAGNAAEALSKFQSGVKVDLLITDLNMPGMNGIDFIKEVRKLPNYRFMPILFLTTESQQSKKAEAKAAGASGWIVKPASADELLNTIK
119897741	932954	Azoarcus sp. BH72	_ putative chemotaxis response regulator _	23	VLTVDDSAAIRGVMTVLLQSAGYAVSSAVDGEDGLARARAQRADLVITDLHMPRLDGFGLIRALRAEPAYRKVPILMLTTESSAEMRERGREAGATGWLVKPFDPDRLLEVV
119898653	933866	Azoarcus sp. BH72	_ putative sensor kinase/response regulator hybrid protein _	24	IAIVEDNTEVAAALAYALTELGHQVISAASRYEVVTRLNGTAPEIILADYRLGGEEDGVGVIRAVRSAFGNDVPALIITGDTDPVVVRRMADHGISVLHKPLDLDALQDRI
119899727	934940	Azoarcus sp. BH72	_ putative virulence regulator protein _	24	IAVVDDDALARSGMEGLLTAWGCEVIAAETPADLLAALSAHRPPQLVISDFSLHGSHNGVDIIAALRQQVGPGLAAVLISGDTGPEAQRLAQDAGVPLLHKPVRPARLRAL
119896738	931951	Azoarcus sp. BH72	_ transcriptional regulator _	25	VLVIEDDPNVRLGCEQALQLAGIAVDAVGSAEAGLAKLGAGFPGIVVTDMRLPGADGLAVVRRARELDPDLPVIMITGHGDVTLAVEAMRSGAYDFIQKPFAPDLLVEVV
119898205	933418	Azoarcus sp. BH72	_ transcriptional regulator _	25	VLYVEDDEAVRMAGCQTFALADLAVEGVDRAEAALPSLASDAPLVLVTDVRLPGMDGMGLLRRAMEIDPDLPVILVTGHGDVAMAVEAMRAGAYDFIEKPFAPEAMVEVV
119897026	932239	Azoarcus sp. BH72	_ nitrogen regulation protein NR_I_ _	29	VWIVDDDRSIRWVLEKALSREEIPHRSFTSANEALAELESTAHPPKVLVSDIRMPGESGLTLLQRVKNLHPHLPVIIMTAYSDLESAVAAFQGGAFEYLPKPFDVDQAVALV
119896916	932129	Azoarcus sp. BH72	_ two-component system response regulator _	2	MLAMPEPLCCAHVTQYLGEATEIEVVGRTAAESEAMQLFFRLRPDVTVLDWRIAMHEPARLVGMLKRVAPGACVVSVVPALDSMPARAARALGADEVVTCDSLPQ
119898741	933954	Azoarcus sp. BH72	_ putative two-component system sensor protein _	31	ILCVDDNPANLKLVAQLLGRRSHIRLTSAHTPELGLELARVHRPDLILLDINMPGMDGYQMLAELAADERLRHVPVIAVTANALPRDIERGRAAGFADYIVKPLVIDSFFAAI
119898702	933915	Azoarcus sp. BH72	_ transcriptional regulator _	35	ILIADDEQNIVISLEFLMKREGFTVVVATDGDEAVRMIRAEQPDLVLLDVMMPKKSGFEVCQEIKADPALQGVRILMLTAKGRDTEVAKGLALGADAYMTKPFSTRDLVARVR
119899004	934217	Azoarcus sp. BH72	_ sigma-54 dependent response regulator _	37	ILVVEDDAALRDAVCLTLEMAGHGVTGVDGGPSALAELERQSFNLVVSDLRMQPMDGLQLLGEIRARLPQLPVLLMTAYGDVDKAVAAMRGGACDFLMKPFEPEVLLENV
119899670	934883	Azoarcus sp. BH72	_ signaling protein _	385	LYVEDNPADADLLRRSLARGMPALALEIVTSIGEAMGRLAASNDFDIVLADLALPDGSGIDLLNWVRERRMPGAFVVLTGSGDQEAAVGALKAGADDYLVKDG
119897270	932483	Azoarcus sp. BH72	_ transcriptional regulator _	39	ILVADDDDRFTRPLAAFLRTRGDQVTVAVDGTAADGLLQHSPFDFALVEVNLAGVNGYELVRRLRSRRQTTPVIFISARQALEDRIHGLDLGADDYVVKPAEISEITARM
119897266	932479	Azoarcus sp. BH72	_ two-component response regulatory protein _	39	ILLAEDDPVIADGIVRALKRGGYAVDHVGNGAEADTAVASQPFDLLILDLGLPRLPGIEVLKRLRARKSALPVLILTAQDGVEDRVRGLDAGADDYLTKPFALPELEARV
119899270	934483	Azoarcus sp. BH72	_ LuxR family transcriptional regulator _	3	ILLADDHAVVRMGFRLLIEGAGAVVVGEADSGEAAITAYAEHQPDALVMDVSMPGIGGLAALERLRARYPHARVLMLSAHDDTQIPARALQAGATGYLSKRAHPSELLRAI
119899260	934473	Azoarcus sp. BH72	_ two-component response regulator _	3	ILLLDDHAVVRTGYRRLIDAEPGLQVVAEAATADEAYACVVGGGIDVAVVDLSLRGASGIEAIRRMLARDPGLRVLVLSMHDSPGYATQAMRAGALGYLTKNSEPDEMLDAIR
119897794	933007	Azoarcus sp. BH72	_ putative two-component response regulator _	3	LLLVDDHAVVRQGYRRLLEQQGNLVVAGEAATGADGLQLWRELQPDLAVLDLALPDIGGLELLARIRQRDPQARLLAFSMHRDVLWAVQAVRAGALGYVTKSSPPEVLQQAVR
119896860	932073	Azoarcus sp. BH72	_ DNA-binding response regulator _	3	AIVDDHAIVRAGFREMLATETDLHIVFEAATGEDALARVADTGCDLLLLDLSLPGQSGVDVLRTLRRRGDSTRVLVLTGFPEDRYAVAMIRLGADGYLCKNCERDELVQAIR
119899039	934252	Azoarcus sp. BH72	_ LuxR family transcriptional regulator _	3	VLIADDHAVVRGGLRQFLSSTEEFDIVAEAANGQTALELVRTSGCDVVLLDITLPDLNGLEVLKRIKRSKPDLPVLIFSMFSEDEFALPALNAGASGYLNKDSPPAQILAAL
119899742	934955	Azoarcus sp. BH72	_ pilus protein _	45	VMVIDDSNTIRRSAEIFLGQAGCQVLLAEDGFDALAKITDHHPDVIFVDIMMPRLDGYQTCALIKKNPRLSATPVIMLSSKDGLFDRARGRMVGSDEYLTKPFTKDSLLKAV
119899746	934959	Azoarcus sp. BH72	_ putative pilus biogenese protein _	47	VMVVDDSLTVRKITGRLLEREGYRVITAKDGVDALEKLIDTIPDVVLSDIEMPRMDGFDLVRNIRADARTHGVPVIMITSRLADKHRSYAQEVGANHYLGKPYQEEELLALI
119897736	932949	Azoarcus sp. BH72	_ EAL/GGDEF domain-containing protein _	48	LLIVDDSEDDAFLVCAELTRRGMAVHHRRVDCDFDMAAALAAEPWDVVLSDHNMPGFSSLAALDVLKSSGLDLPFIIHSGEISDRQAVSAMYEGVDDFIAKGDYDRL
119897875	933088	Azoarcus sp. BH72	_ putative two-component hybrid sensor and regulator _	48	ILHIEDDHDDADLIHHAATRLGVPPDWTMAESRPAFLEALTGRDFDLVLSDSRVPGMDGQEAMRLVRERHPDLPFVFVSGTDDPLWVEQCFRQGAYDHVSKD
119898108	933321	Azoarcus sp. BH72	_ putative two-component hybrid sensor and regulator _	49	FVLDDDPDAREVMRLMLDRAGATVRAFDTSEALLETWRDPAPLPNPAVLLLDIAMPGDSGFEVLRRLRLIGRDPVPAIAVSALTHLDESQFSTAGFRGRVGKPVEEAVLIQTI
119898112	933325	Azoarcus sp. BH72	_ hypothetical protein azo1821 _	49	ILVVDDNAEARAQVEATLHAHGALSRTCASGAEALAWLFALPRAEWPDALICDVALGEEDGYDVIQQLRRYEAEQGFGLGERLPAIALSAYDRSEHRMRALLAGFQVHVAKPVAPDELVAVI
119898773	933986	Azoarcus sp. BH72	_ putative hybrid sensor and regulator _	52	VLVVDDNDLAREVIGDLLRSMSFAVSTASSGLEALDEIQRANAAGMPYEVVFLDWQMPGIDGVETARRIKRALAASSPRLLMVTAYGRDEVMKSAADAGIHDLLIKPVTASLLFDT
119898693	933906	Azoarcus sp. BH72	_ putative sensor-regulator protein _	52	ILVVDDNPTARAMLRTMIEHFHFVADTAASGEEAILKIREAGEQGYAVVLMDRDMPGLDGIEAARRIKLDLSLPTPPRILLMASYTKDHALQEAGHGAGLDGILTKPVGPSLLFNS
119897282	932495	Azoarcus sp. BH72	_ alginate biosynthesis regulatory protein AlgR _	5	VLIVDDETPARTRLRDLLGDIGATCPNVVVGMAANGVEALRLIEQAGGADVVLCDIRMPVMDGVELARHLGRMTEPPAVIFTTAYDQYAVQAFELAAVDYLLKPVRAERLAAAL
119900234	935447	Azoarcus sp. BH72	_ putative hybrid sensor and regulator protein _	64	LLVVDDNASSREQLGLLLGAWGCELLEAADGDAALALLAREAETGGTIDGAILDLRMPGMDGEALGRRIKADPALAHLPLLLLTPVAMRPDAERLRAGGFAAYLAKPVRADLLERA
119899954	935167	Azoarcus sp. BH72	_ putative signaling protein _	69	VLSVDDDAAFQHSLRYALASFRYRDQPIEFLTAGSANEAASLLAARHDIAVVLLDVVMESDDAGLRLVTSIRELLGNAEIRIILLTGQPGVAPMQTSLTRLDINDYWLKT
119896693	931906	Azoarcus sp. BH72	_ chemotaxis-specific methylesterase _	6	VMIVDDSALVRQVVSQAISRDPGIEVIGTAQDPVFALAKLNSLAPDVLVVDIEMPRMDGLTFLKRIMAERPTPVIICSSLAEKGAQVTMEALSAGAVAIITKP
119897747	932960	Azoarcus sp. BH72	_ protein glutamate-methylesterase _	6	VLICDDSAVMRALLADIVAREPDMEVVGTAADALVAREMIRNSKPDVLTLDVEMPQMDGLEFLNRLMRLHPMAVVMISNLTERGSEASLRALELGALEIVGKPQAR
119900271	935484	Azoarcus sp. BH72	_ nitrogen assimilation regulatory protein _	74	ILIVDDEVGIRELLSEILRDEGHDVKLAENAAAARAARNAGRPDMVLLDIWMPDTDGITLLKEWSANGQLTMPVVMMSGHGTIDTAVEATRIGAIDYLEKPIALQKLLSAVK
119899529	934742	Azoarcus sp. BH72	_ response regulator _	7	VLVIESQPTMRTQLRTMLSSAGIEDVSFAVSAGMAVRRLREQRYDLVLCEYHLGEGQDGQHLLEDLRSNEIIPLATLFIMITGERNYERVVSAAELAPNDYILKPLTSETLRVRL
119897751	932964	Azoarcus sp. BH72	_ chemotaxis response regulator _	7	LVVDDFSTMRRIVRNLLKELGYTNVDEAEDGAVALQKLNSAPFDFVVTDWNMPNMDGLTLLQTIRQTPQLKHLPVLMITAEAKKENIIAAAQAGASGYIVKPFTAATLAEKL
119898866	934079	Azoarcus sp. BH72	_ putative two-component hybrid sensor and regulator _	7	TNPAFGERLAAQLVRAGLVPVLAADGAGALAALAAAASANAPFDFVLMDADMPAPGGFALAERFQEAAPALDRIVLMLPSHTQRADLVRCQQLGLQSRLAKPFAAEDLYEAL
119896363	931576	Azoarcus sp. BH72	_ sigma-54 dependent response regulator _	89	VLVVDDEQGMRNFLSRALALRGFVVDTAESAEEGAEKLAATRFDLVILDIALPGKAGIEWLQDLTAAGFAGEVILITAFADMQTAIDALRAGAADFILKPFRIDQILNSI
119899782	934995	Azoarcus sp. BH72	_ sigma-54 dependent response regulator _	89	ILIVDDEEGMRNFLERTLKRRCGLVEAAAGVEQAEALMARLHFDLLVLDIALPGKSGVQWLHELRAHGFAGDVILITAFADMDTAIGALRAGASDFILKPFRVDQILNSI
119898775	933988	Azoarcus sp. BH72	_ putative response regulator _	8	LLVVDDTPQNLAVLGEVLKSHYQVRAVNSGERALRAAHTEPRPDLILLDVMMPEMDGYEVLRHLREDPATRATPVIFITAMTGSDDEMRGLELGAVDYITKPFNPSIVLARV
119898694	933907	Azoarcus sp. BH72	_ two-component response regulator _	8	ILVVDDERINRKLLSELLEEHHDVVIAKSGEQALERVQADSAVDLILLDVVMPGMSGHDVLRRLKASDATKDVPVIFITSLNSVDDEEIGLDLGAADYITKPFHPG
119896947	932160	Azoarcus sp. BH72	_ LuxR family transcriptional regulator _	8	VLIVDDVPENLSLLHDALDEAGYTVLVATNGESALARARQSLPDVVLLDAVMPGMDGFEVARRLKADFVTRAIPLIFMTGLTETEHVVAAFAAGGADYVTKPIKPAEVLARI
119899481	934694	Azoarcus sp. BH72	_ acetoacetate metabolism regulatory protein _	91	LLIVEDDPALQKQMRWAFDGFETVVADDRESAIAQLRRYEPAVVTMDLGLPPEPDATTEGFNLLGEMLALAPDTKVIVLTGQHDRENAVRAVGMGAYDFFAKPFEPELLALT
119899645	934858	Azoarcus sp. BH72	_ two component system response regulator _	95	VLVVDDEEDIRELIALSLLRLGLACDTAGTVAEARQLLDTRRYRLCLTDMRLPDGDGLEIVETIQARCPGLPVAVITAFGSIDTAIRALKLGAFDFVTKPVELKVLRELV
119899060	934273	Azoarcus sp. BH72	_ putative two component transcriptional regulator _	99	LLVVDDDPDLLRLLAMRLQANGYRVSPVGTAEAALARLAVERVDLVLSDVRLPDRDGLALFEEVRRLYPALPVILLTAHGTIPDAIDATSRGVAGYLTKPYDSQDLLDNV
119898962	934175	Azoarcus sp. BH72	_ two-component response regulator _	9	IHVVDDDAAFRRSLVFLFESVGWRVRPHASAEDFLAECDTAAGGGECADIACLVLDIRMPTMSGLELQQAILARGWTLPIVFITGHGDVGLAVQAMKCGASDFLEKPFHDQALLDAV
119897208	932421	Azoarcus sp. BH72	_ two-component response regulator _	9	IIDDDEAIRDALQWLFKTRSVNCRAWSSGEAFLGAWRPEWRGCIVLDIRMDGMSGLECFDALIERGCQLPVIFITGHGDVPMAVGALKKGAFDFIEKPFNDNQLVDLV
119897667	932880	Azoarcus sp. BH72	_ transcriptional regulator _	9	IFIVDDDDALRDSLVWMLESSGYKVVAFDSAEAFLHAWHEGLAGCLVLDVRMPGMSGLELFEELGRRRCTLPVIFITGHGDVPMAVAALKKGAADFIEKPFADREMLALI
158425990	1.52728e+06	Azorhizobium caulinodans ORS 571	_ sensor protein _	0	VLLVEDNEVNRQVALGLLERAGHACTVAETGPEAIGRVAAEIFDVVLMDIQMPGMDGLEATRRIRAAGQSLPIIALTANAMPEDVARSLAAGMNGHLAKPVRPEQLEAAL
158422761	1.52405e+06	Azorhizobium caulinodans ORS 571	_ response regulator receiver _	10	LLLVEDDQDAADYLRKAFREAGHVVDHAADGEDGLAYALDGKYDVLVVDRMLPRRDGLSLVAELRGRGDATPVLILSALGQVDDRVVGLRAGGDDYLPKPYAFTELLARV
158425609	1.5269e+06	Azorhizobium caulinodans ORS 571	_ two-component response regulator _	110	LLVIEDDPELGSWLRTTLEDAFGGADLVTSLDEAQAAVKVREFDLIVMDRRLPDGDSIELIGAFQRLRPRPSLLVLTALDDPNHIAKALDAGADDYLAKPFEPVELIARVR
158424377	1.52567e+06	Azorhizobium caulinodans ORS 571	_ IMP dehydrogenase _	11	VLVVDDDQEIRKLLARYLLSQGFRTTVAASGREMEECLASSRFDMVVLDLMLPDASGLDLCRALRARSRLPIILLTALKEDVDRIIGLEIGADDYLGKPFNPRELVARIR
158425598	1.52689e+06	Azorhizobium caulinodans ORS 571	_ response regulator receiver _	11	LLVVDDDNRIRTLLSRFLSENGYRVTTAASAAEARGRMEGLEFDLIVLDVMMPGETGIDFARSLRATSSIPILMLTARSETMDRITGLEAGVDDYVAKPFEPRELLLRI
158425656	1.52695e+06	Azorhizobium caulinodans ORS 571	_ phosphate regulon transcriptional regulatory protein _	12	ILIIEDEEPLTLLLRYNLESEGYAVDNVGRGDEAETRLRESVPDLVILDWMLPGLSGIELCRRLRTRPETERLPVIMLTARGEETERVRGLATGADDYVVKPFSVPELLARVR
158423577	1.52487e+06	Azorhizobium caulinodans ORS 571	_ response regulator receiver _	13	ILLVEDTEEIGRAIAKRFERIGYAVDWERDGRTAAELLEVQSYDLVVLDVMLPRQDGFSVLKGLRGRGVRTPVLVLTARSAVDDRISALDLGADDYLIKPFDYRELEAR
158425274	1.52657e+06	Azorhizobium caulinodans ORS 571	_ response regulator receiver _	14	IVMIEDDPGHARLIEKNIRRAGVLNEIMPFTDGTSAISFLFGPDGTGAVNAGRALLILLDLNLPDTTGVNILKRIKENEHLKRSPVVVLTTTDDKVEIQRCYDLGANVYVTKPVNYENFSNAV
158422233	1.52353e+06	Azorhizobium caulinodans ORS 571	_ HoxA protein _	15	LLVVDDEPRSVEVMARVLGEEFDVFTAASAAEARAVLEQEWVQAIFCDQRMPELSGVAFLTEVRERWPEIVRIIVTGYTEPEDMIGAINGAGIYQYVTKPWHPDQLL
158422595	1.52389e+06	Azorhizobium caulinodans ORS 571	_ response regulator receiver _	16	VLVAEDDPFLRMLIADALREAGMRVIEAVSADDAMTVLSADIAVDAVLTDVRMPGTMDGVALAMRLAVEYPWLPVFVASGDLD
158423045	1.52434e+06	Azorhizobium caulinodans ORS 571	_ PAS/PAC sensor hybrid histidine kinase _	16	ILIVEDEPAVRLLVTESLGALGYETLVASTGPDGLRILQSDQPIDLLLTDVGLPGLNGRQLADAARVTRPNLKVLFVTGYVHDSGLYEDGLEPGMAVVTKPFDIDKLAKRV
158425275	1.52657e+06	Azorhizobium caulinodans ORS 571	_ response regulator receiver _	174	LYIDDDPGLARLVQRQLGRRGYAVETAASGVEGLERIRAGGIDVVALDHYMPGQDGLQTLEAIRALPAPPPVVYVTGTQESRVAVAALKAGAADYVVKEVQ
158422596	1.52389e+06	Azorhizobium caulinodans ORS 571	_ response regulator receiver _	17	IMVIDADVLVRHVLAEYLRTCGYRVIEAASTDEAAAFMYEAGLTLEAVITDAQAPGALGGFAFARWMREAHPEVDVILSGTPEKSA
158426303	1.5276e+06	Azorhizobium caulinodans ORS 571	_ proble transcriptional regulator _	182	VLVVEDEPVLLDAYLTILEPDYRVLPAQTLKQALALARKTRVDLIVSDFHLGADEGTPLIEALENDAERPPIPIVMITGDPSVRLKVLELGVDTFLTKPVMPDRLRETVK
158425731	1.52702e+06	Azorhizobium caulinodans ORS 571	_ multi-sensor hybrid histidine kinase _	188	VLVADDDDAHRDLMCEMLRPLGFIVFTAADGLACLEMAGQTDPDLVLLDVSMPRLTGWETATALRTRVAPRARIIMVSANAQEMGRRPAEPRHHDDQCVKPVDLRMLLEKI
158422285	1.52358e+06	Azorhizobium caulinodans ORS 571	_ chemotaxis protein CheA _	198	VLLVDDSLFYRNLIEPVLKGTGYEVTACSSGREALEKIAAGARFDAVVSDLEMPDMDGCQLARALRADAATAHLPIIALSSDRSSESIERARVAGFTDYIAKFDRPGLIAAL
158423193	1.52449e+06	Azorhizobium caulinodans ORS 571	_ response regulator receiver _	19	ILVVDDEPAIHRFLSPALTAAGYGVARADDAAGALRAIATHPPDAVLLDLGLPDMDGKEVIGRVRQFSQVPIIVLSARDREAEKIEALDLGADDFVNKPFGVGELMARI
158422062	1.52335e+06	Azorhizobium caulinodans ORS 571	_ Fis-type protein _	204	VEDDFFECSRVESALLHQGHEVVCVGDGDAALARLDAEPFDLMLLDLVLPGLDGMGVLRTLEARGSSVPVIVSVTPAGIDGAASAIRAGARDFVVKPAGALRLKVA
158421975	1.52327e+06	Azorhizobium caulinodans ORS 571	_ response regulator receiver domain-containing protein _	209	ILYVDDEADIREIASLSLGLDPGLTALTAASGPEAVARAKAGGIDLILMDVMMPGVDGPTTLATLRADAATQAIPVAFVTARTQAHEVEHFRSLGAVGVIAKPFDPMTLAATV
158422753	1.52405e+06	Azorhizobium caulinodans ORS 571	_ response regulator receiver _	20	LLVIEDDPDLNRQLVNALGEAGYAVDTAFDGEEGHFLGDSEPYDAVVLDIGLPKLDGISVLEHWRRAGRRMPVLILTARDRWSDKVQGFDAGADDYVAKPFHMEEVLARL
158422196	1.52349e+06	Azorhizobium caulinodans ORS 571	_ regulatory protein _	21	VIADDHPLFRGALREAVAGEFPSAEIVEVGTFDDLHALLEREDDFDLILLDLTMPGARGFSGLIYLRAQYAGVPVVVVSGNEEPAVIRRCIDLGASGFIPKTMGIAGMRQSV
158424036	1.52533e+06	Azorhizobium caulinodans ORS 571	_ response regulator _	222	IVLVDASRVTLKLIGRMLTDNGHEVVCFSDGLEALAYLHGGSEIDLLMTSFETPGVPGIQLCWEARLIANGDRPLYVIAMSSSNDADHLAEALDSGADDFIRKPPAPMELDARL
158424035	1.52533e+06	Azorhizobium caulinodans ORS 571	_ REC protein _	222	IMLVDASRVTLKLLAKTLLESRHDVVAFSDGGEALNYLQSGAEIDLLMTSFEIPGVSGIQLCWEARLIASSGRPLYVIAMSSNNDADHLAEALDSGADDFVSKPPSPVELEARL
158425547	1.52684e+06	Azorhizobium caulinodans ORS 571	_ response regulator receiver _	24	VLAIDNEPAILDGMETLLSGWGCHVIKAADMAGALEALHAAKVQPDFVLVDYHLDAGHGIEAVMALRWKLGKLPAALITADRTRKVREAARAADMAVLNKPLKPAALRAL
158424636	1.52593e+06	Azorhizobium caulinodans ORS 571	_ two component response regulator _	25	FIDDDEILRAANVQALMLAGLTVAPFGSAQAALDAIDPTFPGVVVSDVRMPRIDGLELFRRLRKVDPELPVILITGHGDIAMAVEAMREGAYDFLAKPYAGDRLLG
158422242	1.52353e+06	Azorhizobium caulinodans ORS 571	_ regulatory protein _	25	VLLVDDDPDVLAELSEGLDALGLPSLTAETAVEALDIVQRHDDLQVIVTDLQMPRIDGIELLQKLAVRRRTKPMAAIVITGHASLDRAVGALRLHAVDFLQKPLSAEEVAHAI
158421750	1.52304e+06	Azorhizobium caulinodans ORS 571	_ Fis-type transcriptional regulator _	25	VLIVEDDEDVRLGCLQALELEGLTVIGAKCVEQVPRMAPQDFPGVVVTDIRMPGMDGMAYLRQLVEADADLPVILITGHGDVATAVQAMRDGAYDFIQKPFSPEQLVGVV
158421790	1.52308e+06	Azorhizobium caulinodans ORS 571	_ response regulator _	27	LLIVEDDREIRSLLADFLGREGYDTRLAADGRAMDAILAGIRPDLVILDIMLPGEDGLSLCRRLRAQGDVPVLMLTAKGDEVDRIVGLEVGADDYLVKPFNPRELLARI
158425066	1.52636e+06	Azorhizobium caulinodans ORS 571	_ response regulator receiver _	287	VFVVDEDEITRAALQFMLHDEIETHELATLEEAYEKGEGWLKPDVVMLGVSFLAARGPGLVSEINARFPGVRILIVCDKAQEATAVEGLKAGAHGAVVKPLTLEAVRKKV
158423478	1.52477e+06	Azorhizobium caulinodans ORS 571	_ response regulator receiver _	31	VMIVEDNELNMKLFHDLLEAHGYHTVETRNGIEAMDLARQHRPDLILMDIQLPEVSGLEVTKWLKADAELKAIPVVAVTAFAMKGDEERIRAGGCEAYLSKPISVAKFLETV
158426317	1.52761e+06	Azorhizobium caulinodans ORS 571	_ transcriptional regulator _	32	VLIVDDDKPFLQRLARAMETRGFAVSTAESVADGLAQVEHAAPAYAVVDMRLGDGTGLDVIEALKRQRPHARAIVLTGYGNIATAVTAVKMGAVDYLAKPADADDVMAAL
158423728	1.52502e+06	Azorhizobium caulinodans ORS 571	_ two component transcriptional regulator _	32	LLIVEDDASFARALRRSFERRGYEVRLTSSLEGVQSVLSEVTPAYAVVDLKLAGGSGLECVKELHGRDGDMRIVVLTGFASIATAVEAIKLGACHYLAKPANTDDIEAA
158423290	1.52458e+06	Azorhizobium caulinodans ORS 571	_ sensor protein _	36	VLLVEDEDAVRAFASRALSARGYNVVAASGGAEALAVVDAAEHRFDLVISDVVMPEMDGPTLLRELRARHPELKVIFISGYAEEAFAKNLPASEKFAFLPKPFTLKQLVAAVK
158421980	1.52327e+06	Azorhizobium caulinodans ORS 571	_ PAS protein _	36	LLVEDEPFVAMVARQILEDEGFHVSHANTGAGALSVLEAGPQELVLAVVDIGLPDMSGDALVQQITAFRPDLPVMIASGYGADELLQRFPSGGRTALLPKPYDTAALRSAL
158422240	1.52353e+06	Azorhizobium caulinodans ORS 571	_ DNA-binding response regulator _	37	ILICDDEQELAEELGEFFSSLGWNVRVCLTAPAARAALHDGFVPNCLLTDLRIADHDGAELVSHVRGLPKELQPKVVAIITGHVVSETEAADFKADFLFVKPVDPVVV
158425989	1.52728e+06	Azorhizobium caulinodans ORS 571	_ response regulator receiver _	38	VLIVEDAPESLEMISTFLEENGMRTVRAASGAELKARLQSVQPDIILLDVNLPDADGIALARQLRLGASFGLIFVTARDSDEDVLAGLDAGGDDYVTKPINPRTLLARI
158423564	1.52486e+06	Azorhizobium caulinodans ORS 571	_ response regulator receiver _	39	LLLVEDNLELAEWLAKILRRDNFVVDVLHDGEAADHALSLETYDLVILDLTLPGMSGLHLLRRLRGRNDAVPVIILTANASLDGRVAGLDEGADDYLAKPFDMAELEARI
158424018	1.52531e+06	Azorhizobium caulinodans ORS 571	_ response regulator receiver _	40	ILVVEDEFLVALGLQDNLRVLGYETVGPATTLAMAVQAAEREPLDAAILDINLKGEVVFPAAEILSDRGIPLIFCSDY
158422539	1.52383e+06	Azorhizobium caulinodans ORS 571	_ bacteriophytochrome _	40	LLVVEDQLLIAMEAEAMLLALGAEAVETCNSALEAENRLARFRPDAAVLDIHLSGGTSVPVAQELRRRQIPFVFASGYADLD
158423277	1.52457e+06	Azorhizobium caulinodans ORS 571	_ Fis-type precursor _	56	ILVVDDEKRLGEVLAAALTERGFETTAVSSAAAALAYCEANAVDLVLTDLRMPDRSGRDLLLALKEGRPDLPVIIMTAYATVRGAVDLIKDGAFDYVAKPFELDDVVATI
158425894	1.52719e+06	Azorhizobium caulinodans ORS 571	_ response regulator receiver _	57	ILLAEDDNDMRRFLVKALQNAGYQVASFDNGRSAYERMREEPFELLLTDIVMPEMDGIELARRATELDPDLKVMFITGFAAVALNADVEAPCEAKVLSKPFHLRDLVTEV
158422824	1.52412e+06	Azorhizobium caulinodans ORS 571	_ response regulator receiver _	58	VLLIEDDSATAQSIELMLKSESFNVYTTDLGEEGVDLGKVYEYDIILLDLNLPDMSGFEVLRSLRLAKVKTPILILSGLANTEDKVKGFGFGADDYLTKPFHKDEMVARI
158422923	1.52422e+06	Azorhizobium caulinodans ORS 571	_ two-component system regulatory protein _	5	HGDVAILGEADNLSGAVQLISAEKPDAVFLDIDLGSSDGFQLIARLDQAPHVVFVTAHAQYAVDAFAAAAVDYLLKPVIPERLAEAI
158421983	1.52328e+06	Azorhizobium caulinodans ORS 571	_ two-component response regulator _	60	VLIIEDEWVIALDLKTLVTDLGHEVVGVAPTHTKALELAKDGDFGLVLADIQLADGSSGIDAVTDILGSFDVPVIFITAFPDRLLTGERPEPTYLITKPF
158424710	1.526e+06	Azorhizobium caulinodans ORS 571	_ nitrogen assimilation regulatory protein ntrC _	68	ILVADDDAAIRTVLNQALSRAGYEVRSCGNAATLWRWVSQGDGDLVITDVVMPDENAFDLLPRIKKARPDLPVIVMSAQNTFMTAIRASERGAYEYLPKPFDLKELISIV
158422288	1.52358e+06	Azorhizobium caulinodans ORS 571	_ chemotaxis-specific methylesterase _	6	VMIVDDSVFIRGILSNWLGESPDLRVVATHANGRRAVDDVQKSLPDVVILDLEMPEMDGLTALPLILEKKPNTVVLVASTLTRRGAEVSLKAMSLGAADYVPKPDA
158425689	1.52698e+06	Azorhizobium caulinodans ORS 571	_ response regulator receiver _	73	IALVDDDRNILTSVSIALEAEGYRIDTYTDGASALDGFKTNPPDLAILDIKMPRMDGMELLRRLRQKTDMPVIFLTSKDEEIDELFGLKMGADDFIKKPFSQRLLVERVK
158422316	1.52361e+06	Azorhizobium caulinodans ORS 571	_ two-component response regulator _	75	IVIVDESPVRAAILSEGLHEAGYVNVLRLEGRTNLLERIYAIDPDVILIDLEDPSRDVIEQMLHVSREVKRPVAMFVDQSDGETIQQAIEAGVASYVVDGLRKERV
158422244	1.52354e+06	Azorhizobium caulinodans ORS 571	_ chemotaxis protein CheY _	7	VLVVDDYKTMVRIIRNLLKQIGFEDVDEASDGTEALAKLKERKYGLVISDWNMEPMTGYELLKRVRDDADLSDIPFIMVTAEAKSENVIAAKKAGVSNYIVKPFNAQTLKGKI
158422287	1.52358e+06	Azorhizobium caulinodans ORS 571	_ chemotaxis response regulator _	7	LVVDDSGVVRKVARRILEDLSFNVREAADGQAALKACEEAMPDGILLDWNMPVMEGIEFLELLRKTEGGDVPRVIFCTTNNDIEHITRAIEAGANEYIMKPFDQDILREKL
158421714	1.52301e+06	Azorhizobium caulinodans ORS 571	_ response regulator receiver _	81	ILVVEDDPELREALIEQLALQEEFETVSAGTAQDALEAAKNGAIDLVLMDVGLPDMDGRDAVRQMRKNGFKAPVIMLTGHDTDSDTILGLDAGANDYVTKPFRFAVLLARL
158424707	1.526e+06	Azorhizobium caulinodans ORS 571	_ nitrogen assimilation regulatory protein ntrX _	83	ILIVDDEPDISGLVAGILEDEGYSARTARDADGALAEIAARRPNLIFLDIWLQGSRLDGLELLDIIKREHPEVPVVMISGHGNIETAVAAIKRGAYDFIEKPFNADRLVV
158425732	1.52702e+06	Azorhizobium caulinodans ORS 571	_ two component transcriptional regulator _	8	VLVVDDSPETLSLLTDALEDAGVTVLVAVEGANALTLVEQITPDVILLDAIMPGMDGFETCRRLKALKALAHVPVIFMTGLSETEHIVKGLDAGGVDYVTKPVVPNEIIARM
158423905	1.5252e+06	Azorhizobium caulinodans ORS 571	_ nodulation protein W _	9	VIVVDDDAGLREALSSLFRSVGLEVALFASALEMLAAPLPDAPRCLVLDIRLPGVSGLDFQQQLTRQDVDMPIIFMTGHGDIPMSVRAMKAGALDFLTKPFRDQDMLDAV
158424917	1.52621e+06	Azorhizobium caulinodans ORS 571	_ regulatory protein _	9	IYLVDDDQPVREALCLLLGTYGMTVEAFADPATFLAHVDRSRPGCLILDLRMPMISGLQLQQKLVERGIDWPVIMITGHGDVNACRRAFKAGVLDFLSKPLDEQVLLDAI
158424719	1.52601e+06	Azorhizobium caulinodans ORS 571	_ DNA-binding response regulator _	9	VHVVDDEADMRDALEGLLMASGWRVRTYGSVGAFQEALTAQTAGCLILDVSLPGENGLELQRRLLALGLSLPIVFLSGRSNIPIAVEAMKAGAIEFLTKPAAGEDILAAV
158421818	1.52311e+06	Azorhizobium caulinodans ORS 571	_ nodulation protein W, DNA-binding response regulator _	9	VYIVDDDHSVRAALQDLFASVTLDAMAFSSIREFLEHPRTAGPACLVLDVRMPAQSGMDFYLQMDSLGLRMPVIFITGHGDIAMGVRAIKDGAVDFLTKPFRDHDLLDAV
158421742	1.52303e+06	Azorhizobium caulinodans ORS 571	_ response regulator receiver _	9	IAIIDDDEAVRRATESLIRSLGFGTRSFASAEDFLKSAERDQADCVITDIHMAGMSGVDLQSRLRAEGDMVPLIFITGYPEEKVRRQVDAAGAFGFLAKPFEGNAMIDC
158423906	1.5252e+06	Azorhizobium caulinodans ORS 571	_ response regulator receiver _	9	ITIIDDDEFVRLATESFMRSLGFETRTFACAEDFFSSPLRHATDCIITDVQMPGMSGVELLARLRAEGSAVPVIVVTAFPSDRIRSRATELGALGFFPKPFSGADIVACI
158422986	1.52428e+06	Azorhizobium caulinodans ORS 571	_ two-component response regulator _	9	ISIIDDDESVRLATESLVRSLGLGASAFASAEAFLSSPERQSTACVITDVQMPGMSGIDLQARLRSDGDGVPLIFITAFPEERIRSQAHAGGAIGFLAKPFEGDEMIR
158424718	1.52601e+06	Azorhizobium caulinodans ORS 571	_ two component response regulator _	9	FIDDDPAIGEAIANFFAAYDYEAAVFNDAETFLASTAIDRADCIITDVRLGGMSGLDLLDRLRARPACPPVIVITAFPQDAIRNRALSAGATAFFLKPLPMDELLTSV
158422985	1.52428e+06	Azorhizobium caulinodans ORS 571	_ two-component response regulator _	9	VIVVDDDADLRDALTSLFRSIGLEVVSFGSAPELLAAKLPDTPRCLVLDIRLPGVSGLDFQSQLQRSDLDLPIIFMTGHGDIPMTVRAMKAGAVDFLTKPFRDQDMLDAV
158426280	1.52757e+06	Azorhizobium caulinodans ORS 571	_ response regulator receiver _	9	VVVVDDDPAVRGSLKFALELEGFDVRIFATAAEMLDQDIETLPGSGCLIVDYNLPGLNGLDLLRELKQRQVTWPAILITTHPTEQVRRRATSAGVAIVEKPLFSNALSDAV
158426279	1.52757e+06	Azorhizobium caulinodans ORS 571	_ transcriptional regulatory protein fixJ _	9	VHVIDDDDAVRESLAFLLESSGLAVTQHTSAAAFLDAGVPLDRGCIVTDVRMPGISGLELLKELNARGAHMAVIVMTGHGDVPLAVEAMKLGAADFLEKPFDDAAIIAAVR
154684751	1.41991e+06	Bacillus amyloliquefaciens FZB42	_ YcbB _	113	FIADDDRAIRSILKQMIEDEDLGEVVGEAEDGSQIEGHYLHFKQVDILLIDLLMPGRDGIETIRHLQGSYNGKAVMISQVEAKEMVGEAYSLGIEYFIHKPINKIEIVTVL
154685813	1.42097e+06	Bacillus amyloliquefaciens FZB42	_ CheV _	123	LIIVEDSPLLMRLLTDELTEAGYSEIVTFENGKEAYDYVVELTDNGANLSDHIDMIISDIEMPKMDGHRLTKLLKDNPQSSDVPIMIFSSLITDDLRHRGEVVGADEQISKPEISELIKKV
154686557	1.42172e+06	Bacillus amyloliquefaciens FZB42	_ hypothetical protein RBAM_021260 _	138	ILVVDDEARIRRLLRMYLERENYVIEEAENGDEAIKMGLASDYDLVLLDLMMPGTDGIEVCRQLREKKATPIIMLTAKGEEANRVQGFEAGTDDYIVKPFSPREVVLRV
154686207	1.42137e+06	Bacillus amyloliquefaciens FZB42	_ hypothetical protein RBAM_017740 _	18	VLVVDDAKFMRVKIREILESANYTVAGEAADGEEALAVYQKIRPDLVTMDITMPVKNGIQALQDILAFDPKARIIMCTAMRQQRIVLEAIELGAKDFIVKPFEASKVLEAV
154686050	1.42121e+06	Bacillus amyloliquefaciens FZB42	_ hypothetical protein RBAM_016170 _	18	ILIVDDAAFMRMMIKDILVKNGFDVVAEASDGAQAVEKFKEHSPDLVTMDITMPEMDGITALKEIKQIDPQAKIIMCSAMGQQSMVIDAIQAGAKDFIVKPFQADRVLEAIN
154686839	1.422e+06	Bacillus amyloliquefaciens FZB42	_ YrkP _	1	ILVVEDDRDIGDLLEESLTRSGYEVLTAKDGKRALQLVNDSLDLVILDIMMPGISGIETCQHIRKTSNVPILFLTARSSTLDKTEGLLAGGDDYMTKPFSEEELHARV
154687413	1.42257e+06	Bacillus amyloliquefaciens FZB42	_ CssR _	1	IYLVEDEDNLNELLTKYLENEGWNITSFTKGEDARKQMQPSPHLWILDIMLPDTDGYTLIKEIKEKDPDVPVIFISARDADIDRVLGLELGSNDYIAKPFLPRELIIRV
154688139	1.4233e+06	Bacillus amyloliquefaciens FZB42	_ YycF _	1	ILVVDDEKPIADILEFNLRKEGYDVHCAYDGNEAVEMVEELQPDLILLDIMLPNKDGVEVCREVRKKYDMPIIMLTAKDSEIDKVIGLEIGADDYVTKPFSTRELLARVK
154687900	1.42306e+06	Bacillus amyloliquefaciens FZB42	_ two-component response regulator _	1	ILIVEDDQFISDMVSESLTKEGFEVTAAFNGEEALDILNTQKFEVILLDLMLPKIDGMECLRMIRSKSMVPVLIMSAKDEDVDKALGLGLGADDYISKPFSMLEVIARI
154687499	1.42266e+06	Bacillus amyloliquefaciens FZB42	_ SpaR _	1	ILAIDDEKDILVLIRNILQRDQHTVTILEKAEDQSLDFFQGYDLILLDVMMPGTDGIELCRRIRPLVDSPILFLTAKSDEESIVKGLMTGADDYITKPFGVQELMARVN
154687436	1.4226e+06	Bacillus amyloliquefaciens FZB42	_ YvrH1 _	1	ILIVDDEKAIVDMVKRVLVKEGYHNIKTAGSAEEAIEFVKHETADLLVLDVMMEGMSGFEACTEIRNYTDAPIFFLTARSSDADKLSGFALGADDYITKPFNPLELAARI
154686246	1.42141e+06	Bacillus amyloliquefaciens FZB42	_ YvrH _	1	VLIIDDEKEILELIKTVLIREGIDRVVTASTARDGLAQFHQENPDLVILDIMLPDGEGYDICKQIRDISHVPIIFLSAKGEETDKIVGLAIGGDDYITKPFSPKEVAYR
154688064	1.42323e+06	Bacillus amyloliquefaciens FZB42	_ MrsR2 _	1	ILMVDDDEHILNLLITCFEKEGFSNISTAMTGSETLLKIDQELPNIILLDVMLPDTDGFTLCSKIRSHTNVPILFLTAKTTDLDKLQGFSFGGDDYITKPFNPLEIVARVK
154687043	1.4222e+06	Bacillus amyloliquefaciens FZB42	_ PhoP _	1	ILVVDDEQSIVTLLQYNLERSGYDVITASDGEEALELAENENPDLIVLDVMLPKVDGIDVCKQLRQQKMMVPILMLTAKDEEFDKVLGLELGADDYMTKPFSPREVTARVK
154684868	1.42003e+06	Bacillus amyloliquefaciens FZB42	_ YclJ _	1	ILMIEDNISVCTMTEMFFFKEGFEAEFVHDGVEGYQRFTEEDWDLVILDIMLPSMDGVTICRKIRETSSVPIIMLTAKDTESDQVIGFEMGADDYVTKPFSPLTLVARIK
154687828	1.42299e+06	Bacillus amyloliquefaciens FZB42	_ Spo0F _	200	ILIVDDQYGIRILLNEVFHKEGYQTFQAANGIQALDIVTKERPDLVLLDMKIPGMDGIEILKRMKMIDESIRVIIMTAYGELDMIKESKELGALTHFAKPFDIDEIRDAVK
154685055	1.42022e+06	Bacillus amyloliquefaciens FZB42	_ YdfI _	2	VLIADDHLVVREGLKLLIETNDHYTITGEAENGKTAVRLAEELKPDVILMDLYMPEMSGLEAIKQIKEHSDVPIIILTTYNEDHLMIEGIESGANGYLLKDTSSETLFHT
154684718	1.41988e+06	Bacillus amyloliquefaciens FZB42	_ two-component response regulator _	2	VMVADDQSIVREGLKMILSLHEGIQISGEASCGEEVLRLLSQTETDVILMDIRMPGMDGIETTKAVKARYPSVKVIILTTFEDDHYIFAGLKSGADGYLLKDADSDEMIASL
154685393	1.42055e+06	Bacillus amyloliquefaciens FZB42	_ YhcZ _	2	IVIADDHHVVRKGLRYFFATQEDIEVVGEASTGAEALQQAEKTEPDIILMDLSMPDMDGIEAAKIAAERFPDISIVVLTSYSDQEHVIPALKAGAKAYQLKDAQPDDLVKTL
154687453	1.42261e+06	Bacillus amyloliquefaciens FZB42	_ two-component response regulator _	2	VIIADDNSFIREGMKIILHTYEEFTVSATLENGLEAAEYCKHNSVDIALLDVRMPVMNGVEAAKRIAEETDTKPMILTTFDDDEYILEAIKNGAKGYLLKNTEPERIRDAIK
154688084	1.42325e+06	Bacillus amyloliquefaciens FZB42	_ YocG _	2	IFIAEDQQMLLGALGSLLNLEEDMTVVGQGTSGQDAIDFVKKHAPDICLMDIEMPGVSGLEAAEELKDSGVKIIILTTFARSGYFQRALKAGVSGYMLKDSPSDELVSAI
154687422	1.42258e+06	Bacillus amyloliquefaciens FZB42	_ YvqC _	2	VLLIDDHEMVRMGLAAFLEAQPDIEVAGEASDGQQGVDLAAELLPDVILMDLVMDGMDGIEATKQICATLNDPKIIVLTSFIDDDKVYPVIEAGALSYLLKTSKAAEIAEAI
154686409	1.42157e+06	Bacillus amyloliquefaciens FZB42	_ putative two-component response regulator _	2	VLLVDDHTMIRKGLRVLLEGYPEIKIVGESHNGNDAILKTRQLKPDVVLMDLSMPTGLDGFTASSEILKLSLPVKIIILTMYDEEIFVQKAIEVGAYGYILKNSHYELLYKAI
154684948	1.42011e+06	Bacillus amyloliquefaciens FZB42	_ DctR _	30	VLLIEDDPMVQEVNKEFITGVSGFSVIATAADGDEGIRLIKDLRPGLVVLDVYMPKKDGIKTLQEIRKQKLEVDVIIVSAAKDKETIQLMLQNGAADYILKPFKLERMRQAL
154687264	1.42243e+06	Bacillus amyloliquefaciens FZB42	_ YufM _	30	VLIVEDDPMVGELNKRYLSQIEGFQLKGIASSFQSALHVLSEHHIDLILLDIYMPGKNGLELLTEIRKQNESVDVIVISAASELDVIKKTLRYGAVDYLIKPFEFDRFQTAL
154685233	1.42039e+06	Bacillus amyloliquefaciens FZB42	_ hypothetical protein RBAM_007790 _	30	IAIAEDDFRIAQIHEKFIEHLDGFNVIGKAINAKDTISLLEKRQPDLLLLDIYMPDELGTDLLPLIRGRFPSVDIIIITASAETRLLQEALRSGVSHYVIKPVSAHKFTE
154687664	1.42283e+06	Bacillus amyloliquefaciens FZB42	_ DegU _	3	IVIIDDHQLFREGVKRILDFEPTFEVVAEGDDGDEAARIVEHYHPDVVIMDINMPNVNGVEATKQLVELYPESKVIILSIHDDENYVTHALKTGARGYLLKEMDADTLIEAVK
154687277	1.42244e+06	Bacillus amyloliquefaciens FZB42	_ ComA _	3	ILVIDDHPAVMEGTKTILETDTNLSVDCLSPDASEQFVLRHDFSAYDLILMDLNLGDDISGIELSKKILKENPLCKIIVYTGYEVEDYFEESIRAGLHGAISKTESKEKIMQYI
154688062	1.42322e+06	Bacillus amyloliquefaciens FZB42	_ YxdJ _	46	IMIVEDSEDIRGLLQNYLEKYGYQTVAADDFTAVLDVFLREKPDVVLLDINLPSYDGYYWCRQIRQHSTSPIIFISARSGEMDQVMAIENGGDDYIEKPFSYDIVLAK
154684707	1.41987e+06	Bacillus amyloliquefaciens FZB42	_ two-component response regulator _	46	LLIIEDDKDMAKALQNLLVKWNFETVICGDFDNILSIYEKEEPHIILLDINIPSFDGFYWCKKIREVSSAPIIFCSSRNSNMDIVMAINNGGDDYIQKPFDSHVLVAKL
154687161	1.42232e+06	Bacillus amyloliquefaciens FZB42	_ BceR _	46	ILLIEDDNTLFHEMKERLTGWSFAVHGIKDFSRVIREFTEIKPDLVIIDVQLPKFDGFHWCRMIRSQSNVPILFLSSRDHPADMVMSMQLGADDFIQKPFHFDVLIAKI
154687024	1.42219e+06	Bacillus amyloliquefaciens FZB42	_ hypothetical protein RBAM_025960 _	5	VLIVDDEMLARDELAYLLKRTNEVSDINEAENIESAFDSMMDQKPDLLFLDVDLSGENGFDIAKRLKNMKNPPAVVFATAYDQFALKAFEVDALDYLTKPFDEERVRQTI
154686059	1.42122e+06	Bacillus amyloliquefaciens FZB42	_ chemotaxis-specific methylesterase _	6	VLVVDDSAFMRKMITDFLAAEVQIEVIGTARNGEEALKKIELLKPDVVTLDIEMPVMNGTDTLRKIISIYKLPVIMVSSQTQQGKDRTINCLEMGAFDFITKPSG
154686686	1.42185e+06	Bacillus amyloliquefaciens FZB42	_ Spo0A _	76	VCVADDNRELVSLLSEYIEGQDDMEVIGVAYNGQECLSLFKDKNPDVLVLDIIMPHLDGLAVLERLRESELEKQPNVIMLTAFGQEDVTKKAVDLGASYFILKPFDMENLVGHI
30262963	845340	Bacillus anthracis str. Ames	_ response regulator _	106	IFILEDDVIQAQQMKRLVEEICEKYMLPLDFIEVTSKSENIITNIPKAKYVPIYFLDIEIKREERKGLHVAQEIRKYDTQGIIVFVTTHSEFAPISYQYMVSALTFIDKGL
30261850	844227	Bacillus anthracis str. Ames	_ response regulator _	113	IVDDDEVFRSMLSQIIEDGDLGEVIGESEDGAFIEAEQLNYKKVDILFIDLLMPMRDGIETVRHIASSFTGKIIMISQVESKQLIGEAYTLGVEYYITKPLNKIEVVSVV
30263094	845471	Bacillus anthracis str. Ames	_ response regulator _	113	IVDDEKAVRSMLAQIIEDEDLGEVIGEAENGLSLEQQMLILKNIDILFIDLLMPIQDGIKTIRQIKPSFKGKIIMVSQVESKELIAEAYSLGVEYYIIKPINRIEVLTVV
30261572	843949	Bacillus anthracis str. Ames	_ DNA-binding response regulator ResD _	138	ILIVDDEDRIRRLLKMYLEREQYTIEEADNGDTALEMALQNDYDLILLDLMMPGKDGIEVCKGVREKKATPIIMLTAKGEEVNRVQGFEVGTDDYIVKPFSPREVVLRV
30261730	844107	Bacillus anthracis str. Ames	_ chemotaxis response regulator _	18	ILVVDDAMFMRTMIKNLLKSNSEFEVIGEAENGVEAIQKYKELQPDIVTLDITMPEMDGLEALKEIIKIDASAKVVICSAMGQQGMVLDAIKGGAKDFIVKPFQADRVIEAL
30263183	845560	Bacillus anthracis str. Ames	_ DNA-binding response regulator _	1	ILLADDDKHIRELLHYHLQKEGFKVFEAEDGKVAQEVLEKENIHLAIVDIMMPFVDGYTLCEEIRKYHDIPVILLTAKDQLVDKEKGFISGTDDYIVKPFEPAEVI
30265130	847507	Bacillus anthracis str. Ames	_ DNA-binding response regulator _	1	VLVIKNERSLAKKIVSGLTEEGHFILKLHNENEGLNIIYEQDWDIIILDWDSLSISGPEICRQIRLVKMTPIIIVTDNISSKDCVAGLQAGADDYIRKPFAKEELVARVQ
30262552	844929	Bacillus anthracis str. Ames	_ DNA-binding response regulator _	1	ILIIDDDKEIVELLAVYLRNEGYNIYKAYDGDEALQMISTYEVDLMILDIMMPKRNGLEVCQEVRENNTVPILMLSAKAEDMDKILGLMTGADDYMIKPFNPLELVARVK
30260460	842837	Bacillus anthracis str. Ames	_ DNA-binding response regulator _	1	ILIADDDKEIRNLLKIYLERELYMVDTAIDGEVALQLFNQNNYSIVILDLMMPKVDGIEVCRKLRDKTNVPILMLTAKDHEVDKILGLSIGADDYITKPFSIHEVVARVK
30265484	847861	Bacillus anthracis str. Ames	_ DNA-binding response regulator YycF _	1	ILVVDDEKPIADILKFNLEKEGFEIVMAHDGDEAIEKATEEQPDMVLLDIMLPGKDGLEVCREIRKSSEMPIIMLTAKDSEIDKVLGLELGADDYVTKPFSTRELLARVK
30261916	844293	Bacillus anthracis str. Ames	_ DNA-binding response regulator _	1	ILIVDDDQDIVRFMNVNLMQEGFKVFSAYNGEEALEIINNNSIQLAILDIMMPQMDGIELCRRIREKHSLPIIFLSAKSSDVDKVVGFSTGADDYIVKPFSTIEFIARV
30264659	847036	Bacillus anthracis str. Ames	_ DNA-binding response regulator PhoP _	1	ILVVDDEEFILTLIEFNLQQAGFEVITAMDGEMALQKATTERPDLIILDLMLPKMDGMEVCKELRLQRVMTPILMLTAKDDEFDKVLGLELGADDYMTKPFSPREVVARVK
30263770	846147	Bacillus anthracis str. Ames	_ lantibiotic biosynthesis DNA-binding response regulator _	1	ILAIDDEDGILYIIKSALEKEGHEVTAVSNPLTIPKEKFCHYDLILLDVMMPEIDGFTLCKEIRDFVDSPIVFLTAKTMEKDLITGLSLGGDDYITKPFGIGELRARV
30261228	843605	Bacillus anthracis str. Ames	_ DNA-binding response regulator _	1	ILLVDDETAILQLLTTILEKEGFSHITTATSAEMALSLTQQNDYDLIILDVMLPGQSGFDICPIIRQKTDCPIFFLTAKTSDLDKISGFSHGADDYITKPFNPLEVVARM
30265360	847737	Bacillus anthracis str. Ames	_ stage 0 sporulation protein F _	200	ILIVDDQYGIRVLLHEVFQKEGYQTFQAANGFQALDIVKKDNPDLVVLDMKIPGMDGIEILKHVKEIDESIKVILMTAYGELDMIQEAKDLGALMHFAKPFDIDEIRQAVR
30263549	845926	Bacillus anthracis str. Ames	_ DNA-binding response regulator _	257	VLLVEDERRLREIVSDYFRNEGFEVIEAEDGKKALELFAEHEIDLIMLDIMLPEIDGWSVCRRIRKESAVPIIMLTARSDEDDTLLGFELGADEYVTKPFSPKVLVARA
30260446	842823	Bacillus anthracis str. Ames	_ DNA-binding response regulator _	258	ILVVDDEKEIRNLITIYLKNEGYKVLQAGDGEEGLRLLEENEVHLVVLDIMMPKVDGIHMCMKIREEKEMPIIMLSAKTQDMDKILGLTTGADDYVTKPFNPLELIARIK
30265287	847664	Bacillus anthracis str. Ames	_ DNA-binding response regulator _	295	ILVVDDESSIRNLIRMQLEMEGYEVLTAADGREVLERWNEGPDVLILDVMLPDTDGYELLRLFREKDRDIPVLMLTAKSQMNDKLLGLQLGADDYVTKPFNYAELILRV
30262227	844604	Bacillus anthracis str. Ames	_ DNA-binding response regulator _	297	ILIVEDEEKIARVVQLELEFEGYESEIAKTGTEAMEKFGNGNWDLILLDVMLPNISGLEVLRRIRLKNAVIPIILLTARDSVVDKVSGLDQGASDYITKPFQIEELLARI
30265432	847809	Bacillus anthracis str. Ames	_ DNA-binding response regulator _	2	VLLVDDHTVVLKGLAFFLSTQEDIELVGEASNGKEALVKVGETNPDVVLMDLYMPEMDGVEATACIKKEYPDVKVIVLTSFSDQAHVLPALRAGASGYILKDVEPDQLVEAIR
30261839	844216	Bacillus anthracis str. Ames	_ LuxR family DNA-binding response regulator _	2	ILIADDNSFIREGMKIILNTYEEFEVVDTVNDGKEAVEYCKKNDVDIALLDVRMPNMNGVEATKLICEETETKPLILTTFDDDEYILDAVKNGAKGYLLKNNDPERIRDAIK
30261536	843913	Bacillus anthracis str. Ames	_ DNA-binding response regulator _	2	VLLVDDHEMVRMGVSAYLSTQPDIEVVGEAENGRKGSELALQLRPDIILMDLVMDEMDGVEATRAIIQEWPEAKIVVVTSFLDDEKLYPVIEAGATSYLLKTSRASDIADAV
30262277	844654	Bacillus anthracis str. Ames	_ LuxR family DNA-binding response regulator _	2	LLLVEDHHIVRRGLVFFLKTREEFEIVGEAENGEDALTFVRTERPDVVLMDLSMPKMDGIEATKQIKQYDETIKILILSSFSEQDYVLPALEAGADGYQLKEVQPEQLVASI
30264915	847292	Bacillus anthracis str. Ames	_ DNA-binding response regulator _	300	ILIADDEAEIADLIEIHLEKEGYHVVKAADGEEAIHIIETQPIDLVVLDIMMPKMDGYEVTRQIRAKHHMPIIFLSAKTSDFDKVTGLVLGADDYMTKPFTPIELVARVN
30264605	846982	Bacillus anthracis str. Ames	_ DNA-binding response regulator _	301	ILLVEDDLSIQEMVEKYLVKEGFQVTIASDGEEGVDTYLKGSFDLIILDIMMPKLDGLEVVRIIREKSAVPILMMSAKDTDVDKAVGLGLGADDYICKPFSMIELAARVK
30260742	843119	Bacillus anthracis str. Ames	_ DNA-binding response regulator _	302	ILLVDDEERMLRLLDLFLSPRGYFCMKATSGLEALKLIEQKDFDIILLDVMMPNMDGWDTCYQIRQISNVPIIMLTARNQNYDMVKGLTMGADDYITKPFDEHVLVARI
30261401	843778	Bacillus anthracis str. Ames	_ DNA-binding response regulator _	306	VLVVDDESDMRQLVGMYLDNFGYEWGEAENGKEALKKLETDHYDFVVLDIMMPEMDGLSVCKEIRKTSDVPIIFLTAKGEEWNRVNGLRMGADDYIVKPFSPGELIARM
30261053	843430	Bacillus anthracis str. Ames	_ response regulator _	30	VAIAEDDFRVAQIQEEFLLKIKDVKVMGKALNAKETMELLQREEIDLLLLDNYLPDGIGTDLLPQIHAEFPNVDVIMVTAANENHMLEKAIRNGVSNYLIKPVTLEKFVRTI
30260734	843111	Bacillus anthracis str. Ames	_ response regulator _	30	THYLEQVGGFELVQAVNSIKSAIEVLEESRIDLVLLDIFMPEETGFELLMYIRNQEKEIDIMMISAVHDMGSIKKALQYGVVDYLIKPFTFERFKEAL
30260805	843182	Bacillus anthracis str. Ames	_ DNA-binding response regulator _	311	ILLVDDEPRMLELLTLYLTPIGYNCICARSGEEAISHIENQNFKFILLDIMMPKMDGWETCKKIRSFSNVPIIMVTARDQTIDVVQGLKLGADDYVTKPFHEEELFARI
30265077	847454	Bacillus anthracis str. Ames	_ DNA-binding response regulator _	328	ILVIEDNPDIQELIREFLMAQNFTVDVVGAGTEGILLFQKNSYDLVLLDVMLPDIDGYSICKIMRGQSDVPIIMLTGLHNEESEIKGFELGIDDYITKPFHYTVFIKRV
30265437	847814	Bacillus anthracis str. Ames	_ response regulator _	341	LLIMEEAEERRSLAEKFIENIKNVECFEASMGTEALFIMKKHTPDFVFLNSKLMDGTGFEYVNLLREVNCYAKFIFMGEDIEESITAFRFQAFYYLLRPFREEDL
30264568	846945	Bacillus anthracis str. Ames	_ DNA-binding response regulator _	34	VLLVDDEPLELEQLEFLIHRQFPNWTLHLALDAAEALSINEKFSIHLALLDIHLPGISGLQLGEKFKNNNANLDIIIVTAYQNFDYAKQSIRLGVIDYITKPIIEKELIDVL
30261986	844363	Bacillus anthracis str. Ames	_ DNA-binding response regulator _	351	ILIVDDDPHIRELVSVFLECEGFQTYEAIDGLDALQKINQVKVDMVILDIMMPNMDGFDVCFELRKYYDIPILILTAKGETSQKVKGFHLGTDDYLVKPFDPIELVVRVK
30263158	845535	Bacillus anthracis str. Ames	_ DNA-binding response regulator _	357	VLIVEDEQDLQNILVKRLNAEHYSVDACGNGEDALDYINMATYDLIVLDIMIPGINGLQVLQKLRADNHTTSVLLLTAKDTIDDRVKGLDLGADDYLVKPFAFDELLARI
30262004	844381	Bacillus anthracis str. Ames	_ DNA-binding response regulator _	372	ILVLEDEMPIRSFIVLNLKRAGFYVLEASTGEEALQILCEHTVDVALLDVMLPGMDGFQVCKAIREENKKIGIIMLTARVQNEDKVQGLGIGADDYIAKPFSPVELTARI
30264882	847259	Bacillus anthracis str. Ames	_ DNA-binding response regulator _	374	ILIVEDEDILREILKDYFLSEQYVVFEARDGKEALVVFEEEEVDLVILDIMLPELDGWSVCRRIRKTSEVPIIMLTARVDEDDTLLGFELGADDYVTKPYSPPILLAR
30264508	846885	Bacillus anthracis str. Ames	_ DNA-binding response regulator _	46	ILIVEDDEKIAGILEEHLERYGYQSFRASDLRHIKDEFVKVNPHLVLLDINLPYFDGFYWCRQIRTVSNAPIIFVSARTGEMDQVMAIENGGDDYITKPFHLDVVMAKV
30262585	844962	Bacillus anthracis str. Ames	_ DNA-binding response regulator _	46	IMIVEDDMKIAELLSTHVAKYGYEGIIVSDFQNVLNIFLEEQPELVLLDINLPSFDGYYWCRQIRGVSTCPILFISAREGTMDQVMALENGGDDFISKPFHYEVVMAKI
30264900	847277	Bacillus anthracis str. Ames	_ DNA-binding response regulator _	46	ILIVEDDPNISSLLQSHIQKYGYEAVVAENFDDIMESFNAVKPHLVLLDVNLPKFDGFYWCRQIRHESTCPIIFISARAGEMEQIMAIESGADDYITKPFHYDVVMAKI
30260728	843105	Bacillus anthracis str. Ames	_ DNA-binding response regulator _	53	LLVVEDNASLLESIVQILCDEFEVDTALNGEDGLFLALQNIYDAILLDVMMPEMDGFEVIQKIRDEKIETPVLFLTARDSLEDRVKGLDFGGDDYIVKPFQAPELKARI
30265460	847837	Bacillus anthracis str. Ames	_ response regulator LytR _	5	VLVVDDEMLARDELKYLLERTKEVEIIGEADCVEDALEELMKNKPDIVFLDIQLSDDNGFEIANILKKMKNPPAIVFATAYDQYALQAFEVDALDYILKPFDEERIVQTL
30264247	846624	Bacillus anthracis str. Ames	_ stage 0 sporulation protein A _	76	VCLVDDNKELVSMLESYVAAQDDMEVIGTAYNGQECLNLLKDKQPDVLVLDIIMPHLDGLAVLEKMRHIERLRQPSVIMLTAFGQEDVTKKAVDLGASYFILKPFDMENLTSHI
30261118	843495	Bacillus anthracis str. Ames	_ response regulator _	8	ILIVDDNPVNIFVIKKILKQAGYQDLVSLNSAQELFEYIHFGKDSSRHNEIDLILLDIMMPEIDGLEVCRRLQKEEKFKDIPIIFVTALEDANKLAEALDIGAMDYITKPINKVELLARM
30265375	847752	Bacillus anthracis str. Ames	_ DNA-binding response regulator _	98	IIIAEDQRMLRGALGALLDLEDDIEVIGQAANGEEALKLIESLKPDVSIMDIEMPIQSGLDVAETLKKEKSACKVMILTTFARPGYFERAMKAGVHGYLLKDSPSEDLAASI
42782100	979347	Bacillus cereus ATCC 10987	_ response regulator _	106	IFILEDDVIQAQQIKRLVEEICEKYMLPFDFIEVTSKSENIITNIAKAKYVPIYFLDIEIKREERKGLQVAQEIRKYDTQGIIVFVTTHSEFAPISYQYMVSALTFIDKGLP
42780944	978191	Bacillus cereus ATCC 10987	_ response regulator _	113	IVDDDEVFRSMLSQIIEDGDLGEVIGESEDGAFVEAEQLNYKKVDILFIDLLMPMRDGIETVRHIASSFTGKIIMISQVESKQLIGEAYTLGVEYYITKPLNKIEVVSVV
42780850	978097	Bacillus cereus ATCC 10987	_ chemotaxis protein CheV _	123	IYIAEDSAMLRQILEETLSSAGYTKMNFFSNGAEALAQIEKLAKEQGEKMFEHIHMLITDIEMPKMDGHHLTKVIKDSEIMNRLPVVIFSSLITNELFHKGEAVGANAQVSKPDIQELIG
42780675	977922	Bacillus cereus ATCC 10987	_ DNA-binding response regulator ResD _	138	ILIVDDEDRIRRLLKMYLEREQYTIEEADNGDTALEMALQNDYDLILLDLMMPGKDGIEVCKGVREKKATPIIMLTAKGEEVNRVQGFEVGTDDYIVKPFSPREVVLRV
42780821	978068	Bacillus cereus ATCC 10987	_ chemotaxis response regulator _	18	ILVVDDAMFMRTMIKNLLKSNSEFEVIGEAENGVEAIQKYKELQPDIVTLDITMPEMDGLEALKEIMKIDSSAKVVICSAMGQQGMVLDAIKGGAKDFIVKPFQADRVIEAL
42782326	979573	Bacillus cereus ATCC 10987	_ DNA-binding response regulator _	1	ILLADDDKHIRELLHYHLQKEGFTVFEAEDGKVAQEVLEKENIHLAIVDIMMPFVDGYTLCEEIRKYHDIPVILLTAKDQLVDKEKGFISGTDDYIVKPFEPAEVI
42784273	981520	Bacillus cereus ATCC 10987	_ DNA-binding response regulator _	1	VLVIKNERSLSKKIVSGLTEEGHFILKLHNENEGLNIVYEQDWDIIILDWDSLSISGPEICRQIRLVKMTPIIIVTDNISSKDCVAGLQAGADDYIRKPFAKEELVARVQ
42782234	979481	Bacillus cereus ATCC 10987	_ DNA-binding response regulator VicR _	1	VLIIEDEKIIRETVAHYFSHDGYDVITAEDGQIGLELFAAHDHEVSLIILDIMLPVMDGWSICRRIRKSSNVPIILLTARSDEDDTLLGFELGADDYVTKPFKPAILLAR
42781625	978872	Bacillus cereus ATCC 10987	_ DNA-binding response regulator _	1	ILIIDDDKEIVELLAVYLRNEGYNIYKAYDGDEALQMISTYEVDLMILDIMMPKRNGLEVCQEVRENNTVPILMLSAKAEDMDKILGLMTGADDYMIKPFNPLELVARVK
42781949	979196	Bacillus cereus ATCC 10987	_ response regulator _	1	VLIADDEQDMLRILKAYFEKEGFEVLLAKDGEEALQIFYDEKIDLAILDWMMPKHSGITVCQEIKKNSSVKVLMLTAKSESEDELAALQSGADEYVKKPFHPGVLITRA
42784660	981907	Bacillus cereus ATCC 10987	_ DNA-binding response regulator YycF _	1	ILVVDDEKPIADILKFNLEKEGFEIVMAHDGDEAIEKATEEQPDMVLLDIMLPGKDGLEVCREIRKSSEMPIIMLTAKDSEIDKVLGLELGADDYVTKPFSTRELLARVK
42781025	978272	Bacillus cereus ATCC 10987	_ DNA-binding response regulator _	1	ILIVDDDQDIVRFMNVNLMQEGFKVFSAHNGEEALEIINKNNIQLAILDIMMPQMDGIELCRRIREKHSLPIMFLSAKSSDVDKVIGFSTGADDYIVKPFSTIEFIARV
42783766	981013	Bacillus cereus ATCC 10987	_ DNA-binding response regulator PhoP _	1	ILVVDDEEFILTLIEFNLQQAGFEVITAMDGEMALQKATTERPDLIILDLMLPKMDGMEVCKELRLQRVMTPILMLTAKDDEFDKVLGLELGADDYMTKPFSPREVVARVK
42780293	977540	Bacillus cereus ATCC 10987	_ DNA-binding response regulator _	1	ILLVDDETAILQLLTTILEKEGFSHITTATSAEIALSLTEQNDYDLIILDVMLPGQSGFDICPIIRQKTDCPIFFLTAKASDLDKISGFAHGADDYITKPFNPLEVVARM
42784511	981758	Bacillus cereus ATCC 10987	_ stage 0 sporulation protein F _	200	ILIVDDQYGIRVLLHEVFQKEGYQTFQAANGFQALDIVKKDNPDLVVLDMKIPGMDGIEILKHVKEIDESIKVILMTAYGELDMIQEAKDLGALMHFAKPFDIDEIRQAVR
42782670	979917	Bacillus cereus ATCC 10987	_ DNA-binding response regulator _	257	VLLVEDERRLREIVSDYFRNEGFEVIEAEDGKKALELFAEHEIDLIMLDIMLPEIDGWSVCRRIRKESAVPIIMLTARSDEDDTLLGFELGADEYVTKPFSPKVLVARA
42779375	976622	Bacillus cereus ATCC 10987	_ DNA-binding response regulator _	258	ILVVDDEKEIRNLIKIYLKNEGYKVLQAGDGEEGLRLLEENEVHLVVLDIMMPKVDGIHMCMKVREEKEMPIIMLSAKTQDMDKILGLTTGADDYVTKPFNPLELIARIK
42784424	981671	Bacillus cereus ATCC 10987	_ DNA-binding response regulator _	295	ILVVDDESSIRNLIRMQLEMEGYEVLTAADGREALERWNEGPDVLILDVMLPDTDGYELLRLFREKDRDIPVLMLTAKSQMNDKLLGLQLGADDYVTKPFNYAELILRV
42784585	981832	Bacillus cereus ATCC 10987	_ DNA-binding response regulator _	2	VLLVDDHTVVLKGLAFFLSTQEDIELVGEASNGKEALIKVGETNPDVVLMDLYMPEMDGVEATACIKKEYPDVKVIVLTSFSDQAHVLPALRAGASGYILKDVEPDQLVEAIR
42780933	978180	Bacillus cereus ATCC 10987	_ LuxR family DNA-binding response regulator _	2	ILIADDNSFIREGMKIILNTYEEFEVVDTVNDGKEAVEYCKKNDVDIALLDVRMPNMNGVEATKFICEETKTKPLILTTFDDDEYILDAVKNGAKGYLLKNNDPERIRDAIK
42780637	977884	Bacillus cereus ATCC 10987	_ DNA-binding response regulator _	2	VLLVDDHEMVRMGVSAYLSTQPDIEVVGEAENGRKGSELALQLRPDIILMDLVMDEMDGVEATRAIIQEWPEAKIVVVTSFLDDEKLYPVIEAGATSYLLKTSRASDIADAV
42781357	978604	Bacillus cereus ATCC 10987	_ LuxR family DNA-binding response regulator _	2	LLLVEDHHIVRRGLVFFLKTREEFEIVGEAENGEDALTFVQTKRPDVVLMDLSMPKMDGIEATKRIKQYDETIKILILSSFSEQDYVLPALEAGADGYQLKEVQPEQLVASI
42782344	979591	Bacillus cereus ATCC 10987	_ response regulator receiver domain-containing protein _	2	LLIVDDQPFVRESLRTLLDRYEDLNVVGLAENGNQAIDLCGRLQPHVILMDLDMQHMNGVEATKKIKQQWPHIRVLIFTTFQDTEQALESLRNGADGFLLKSIETLELANTI
42784056	981303	Bacillus cereus ATCC 10987	_ DNA-binding response regulator _	300	ILIADDEAEIADLIEIHLEKEGYHVVKAADGEEAIHIIETQPIDLVVLDIMMPKMDGYEVTRQIRAKHHMPIIFLSAKTSDFDKVTGLVLGADDYMTKPFTPIELVARVN
42783708	980955	Bacillus cereus ATCC 10987	_ DNA-binding response regulator _	301	ILLVEDDISIQEMVQKYLIKEGFQVTIASDGEEGVNTYLQGSFDLIILDIMMPKLDGLEVVRIIREKSAVPILMMSAKDTDVDKAVGLGLGADDYICKPFSMIELAARVK
42779728	976975	Bacillus cereus ATCC 10987	_ DNA-binding response regulator _	302	ILLVDDEERMLRLLDLFLSPRGYFCMKATSGLEALKLIEQKDFDIVLLDVMMPNMDGWDTCYQIRQISNVPIIMLTARNQNYDMVKGLTIGADDYITKPFDEHVLVARI
42780487	977734	Bacillus cereus ATCC 10987	_ DNA-binding response regulator _	306	VLVVDDESDMRQLVGMYLDNFGYEWGEAENGKEALKKLETNHYDFVVLDIMMPEMDGLSVCKEIRKTSDVPIIFLTAKGEEWNRVNGLRMGADDYIVKPFSPGELIARM
42780086	977333	Bacillus cereus ATCC 10987	_ response regulator _	30	VAIAEDDFRVAQIQEEFLLKIKDIKVIGKALNAKETMELLQREEIDLLLLDNYLPDGIGTDLLPKIHADFPNVDVIMVTAANENHMLEKAIRNGVSNYLIKPVTLEKFVRTI
42779718	976965	Bacillus cereus ATCC 10987	_ response regulator _	30	VLIVEDDPMVAMLNTHYLEQAGGFELVQAVNSVKSAIEVLEASRVDLVLLDIFMPEETGFELLMYIRNQEKEIDIMMISAVHDMGSIKKALQYGVVDYLIKPFTFERFKEAL
42779700	976947	Bacillus cereus ATCC 10987	_ DNA-binding response regulator _	30	VLIVEDDIRIADIHRRFTGKIEGFKVIGTATTGEQAKEWLDLVKPQLVLLDVYLPDMQGTELVTYIRHNLHDTDIIMITAASETDVVRHALRGGVTDYIVKPLMFDRFKT
42779797	977044	Bacillus cereus ATCC 10987	_ DNA-binding response regulator _	311	ILLVDDEPRMLELLTLYLTPIGYNCICAQSGEEAISHIENQNFKFILLDIMMPKMDGWETCKKIRSFSNVPIIMVTARDQTIDVVQGLKLGADDYVTKPFHEEELFARIK
42784219	981466	Bacillus cereus ATCC 10987	_ DNA-binding response regulator _	328	ILVIEDNPDIQELIREFLMAQNFTVDVVGAGTEGILLFQKNSYDLVLLDVMLPDIDGYSICKIMRGQSDVPIIMLTGLHNEESEIKGFELGIDDYITKPFHYTVFIKRV
42784591	981838	Bacillus cereus ATCC 10987	_ response regulator _	341	LLIMEDAEERRSLAEKFTENIRNVECFEANTGTESLFMMKKHTPDFVFLNSKLLDGTGFEYASLLREVNCYTKFIFMGEDIEESITAFRFQAVYYLLRPFREEDL
42781109	978356	Bacillus cereus ATCC 10987	_ DNA-binding response regulator _	351	ILIVDDDPHIRELVSVFLEREGFQTYEAIDGLDALQKINEVKVDMVILDIMMPNMDGFDVCFELRKYYDIPILMLTAKGETSQKVKGFHLGTDDYLVKPFDPIELVVRVK
42781806	979053	Bacillus cereus ATCC 10987	_ transcription response regulator-like protein _	360	ILVVEDDQEIQELIKQFLMTQQYTVVVASDGLEGMTQFNKQSFDLVLLDVMMPNLNGFEVAKMIRSQSNIPIIMLTALEEEEDQMKGFDLGIDDYITKPFSFHVLIRRV
42780178	977425	Bacillus cereus ATCC 10987	_ LuxR family DNA-binding response regulator _	362	VLIVDDHFVVREGLKLIIETSDSFQIIGEATNGEEALSFIEKKKPDVILMDLNMPKMSGLETIEVLNKKQNHTPIIILTTYNEDELMLKGIELGAKGYLLKDTDRENLFRTL
42781127	978374	Bacillus cereus ATCC 10987	_ DNA-binding response regulator _	372	ILVLEDEIPIRSFIVLNLKRAGFYVLEASTGEEALQILCEHTVDVALLDVMLPGIDGFQVCKAIREENKKIGIIMLTARVQDEDKVQGLGIGADDYIAKPFSPVELTARI
42784015	981262	Bacillus cereus ATCC 10987	_ DNA-binding response regulator _	374	ILIVEDEDILREILKDYFLSEQYIVFEARDGKEALVVFEEEEVDLVILDIMLPELDGWSVCRRIRKTSEVPIIMLTARVDEDDTLLGFELGADDYVTKPYSPPILLAR
42780312	977559	Bacillus cereus ATCC 10987	_ competence protein A, putative _	3	VLIIDDHMAVGMGTKALIETEDICADVLFDSAEYLSCITKKKYDVYLVDLFMPNLNGLEVTKGILKHDPDAAIIIYTGFDIEPHFNLLLENNISGIISKTASKEQMITTI
42784035	981282	Bacillus cereus ATCC 10987	_ DNA-binding response regulator _	46	ILIVEDDPNISSLLQSHIQKYGYDAVVTENFDDIMESFNTVKPHLVLLDVNLPKFDGFYWCRQIRHESTCPIIFISARAGEMEQIMAIESGADDYITKPFHYDVVMAKI
42783577	980824	Bacillus cereus ATCC 10987	_ DNA-binding response regulator _	46	ILIVEDDEKIAGILEEHLERYGYQSFRASDLRHIKDEFVKVNPHLVLLDINLPYFDGFYWCRQIRTVSNAPIIFVSARTGEMDQVMAIENGGDDYITKPFHLDIVMAKV
42781676	978923	Bacillus cereus ATCC 10987	_ DNA-binding response regulator _	46	IMIVEDDMKIAELLSTYVAKYGYEGIIVSDFHNVLNIFLEEQPELVLLDINLPSFDGYYWCRQIRGVSTCPILFISAREGTMDQVMALENGGDDFISKPFHYEVVMAKI
42779713	976960	Bacillus cereus ATCC 10987	_ DNA-binding response regulator _	53	LLVVEDNASLLESIVQILHDEFEVDTALNGEDGLFLASQNIYDAILLDVMMPEMDGFEVIQKIRDEKIETPVLFLTARDSLEDRVKGLDFGGDDYIVKPFQAPELKARI
42784618	981865	Bacillus cereus ATCC 10987	_ response regulator LytR _	5	VLVVDDEMLARDELKYLLERTKEVEIIGEADCVEDALEELMKNKPDIVFLDIQLSDDNGFEIANILKKMKNPPAIVFATAYDQYALQAFEVDALDYILKPFDEERIVQTL
42780166	977413	Bacillus cereus ATCC 10987	_ sensor histidine kinase/response regulator _	71	ILIVDDDHRNIFALQNALEKQHANIITAQNGIECLDILKNNTNIDLILMDIMMPNMDGYETMEHIRMNLGLHEIPIIALTAKAMPNDKEKCLSAGASDYISKPLNLHQLYS
42783289	980536	Bacillus cereus ATCC 10987	_ stage 0 sporulation protein A _	76	VCLVDDNKELVSMLESYVAAQEDMEVIGTAYNGQECLNLLKDKQPDVLVLDIIMPHLDGLAVLEKMRHIERLRQPSVIMLTAFGQEDVTKKAVDLGASYFILKPFDMENLTSHI
42780164	977411	Bacillus cereus ATCC 10987	_ response regulator _	8	ILIVDDNPVNIFVIKKILKQAGYQDLVSLNSAQELFEYIHFGKDSSRHNEIDLILLDIMMPEIDGLEVCRRLQKEEKFKDVPIIFVTALEDANKLAEALDMGAMDYITKPINKVELLARM
42784527	981774	Bacillus cereus ATCC 10987	_ DNA-binding response regulator _	98	IIIAEDQRMLRGALGALLDLEDDIEVIGQAANGEEALKLIESLKPDVSIMDIEMPIQSGLDVAETLKKEKSACKVMILTTFARPGYFERAMKAGVHGYLLKDSPSEDLAASI
56962548	174274	Bacillus clausii KSM-K16	_ two-component response regulator _	113	IIDDEPGCRRMLASIIKKTGLGEIVLSDEGNAASIHAIIARQPDIVLIDLLMPKIDGLDMIEQLKTAGYRGRFVMISQNDNKELVGEAYQLGVEFFIHKPIHAIE
56963907	175638	Bacillus clausii KSM-K16	_ chemotaxis protein CheV _	123	LLLVEDSKTLRSLLVDALREAGYEDVTTFDNGRDASRYLTDDACPLYEAIVTDIEMPYMNGHELTRHLRQDSRYQETPVIAFSSLDKGLMERRGEEAGVTEHVAKPDIHQLVDAL
56963600	175331	Bacillus clausii KSM-K16	_ two-component response regulator _	138	LLVVDDEERIRRLLRMYLEREEYQIEEASNGEEALELALAKEYDLILLDVMMPGMDGVEMCQELRKKKATPVMMLTAKGEEANRVQGFEVGADDYIVKPFSPREVVLRV
56964021	175752	Bacillus clausii KSM-K16	_ two-component response regulator of modulation of flagellar _	18	VLVVDDAAFMRMMLKDILTKNGYNVVGEANDGNQAVEKYKELSPDLVTMDITMPEKDGISALKEIKQYDPSAKVIMCSAMGQQAMVIDAIQEGAKDFIVKPFQADRVIDAI
56963288	175019	Bacillus clausii KSM-K16	_ two-component response regulator _	1	IYLVEDEANLSEVLKAYLQKEGWNVTVFLDGNAAIEAVPDKPHLWVLDIMLPGTDGYQVLKAIKEQEDTPVIFISARDQDLDRVLGLEMGSDDYLAKPFLPQELIIRV
56962949	174676	Bacillus clausii KSM-K16	_ two-component response regulator _	1	ILIADDEEEIADLLAIHLEKEGYSVAKAADGQEAIHIVETQPIDLLILDIMMPKMDGYEVTRRIRETHNMPIIFLSAKTSDFDKVHGLVIGADDYITKPFTPIELVARVN
56962941	174668	Bacillus clausii KSM-K16	_ two-component response regulator _	1	ILLVEDDPEISDLVKAHLENEGYRVLTAADGEEAARLFANGGVDLVLLDLMLPKMNGMTLLKQIRVHSSVPILILSAKGSDLDKALGLGFGADDYIAKPFSLIELTARV
56965856	177590	Bacillus clausii KSM-K16	_ two-component response regulator _	1	ILVVDDEKSIADILKFNLEKEGFDVTCAYDGNEALERVKERKPDLMLLDIMLPYKDGMEVCREVRKQYDLPIIMLTAKDSEIDKVLGLELGADDYVIKPFSTRELLARVK
56964476	176207	Bacillus clausii KSM-K16	_ two-component response regulator of alkaline phosphatase synthesis _	1	ILVVDDEPSISTLLQYNLEQAGFEVETKLDGQAGFDRAKEADFDLIILDLMLPGMDGMDVCRQLRQEQIFVPILMLTAKDDEFDKVLGLELGADDYMTKPFSPREVTARV
56962979	174706	Bacillus clausii KSM-K16	_ two-component response regulator _	1	ILAVDDEQDILVLIQNILQRDGHKVDTIAQPDKVALNAFAGYDLILLDVMMPHLNGFDLCEKIRPIVDCPILFLTAKAEEAAVVEGFTSGGDDYISKPFSIRELSARVN
56962305	174030	Bacillus clausii KSM-K16	_ two-component response regulator _	1	ILVVDDDQSIADLLRDFLENDHFYVLTASNTEEAWEAFQQSAVDCLILDIMMPGENGFAFCRRIRAKSDVPILFLSARSADVDKIRGLTLGGDDYIVKTASPGEIVARVK
56965403	177135	Bacillus clausii KSM-K16	_ two-component response regulator _	1	ILIVDDEIGIVKLLEITLEKENFIHIDKATTGKEALQLTKEKTFNLILLDIMLPDISGFELCTEIRRNTDTPIIFVSSRATDFDKLTGLGIGGDDYITKPFNPLEVIARI
56962036	173758	Bacillus clausii KSM-K16	_ two-component response regulator _	1	IAIVEDDVWMREELMDILKKEGFDVVAVTVFHDIAHQIATLAPDLVLLDINLPGQSGFDLCKSLKSKGIGPILILTSRDKLQDELHGFHLGADDYLTKPCNRDRLLARI
56963624	175355	Bacillus clausii KSM-K16	_ two-component response regulator _	1	ILLIEDDRSIATIVKEYLERESFKVVWQADGESGYHAFCEGAYQLVLIDLMLPKMDGFALCEKIRASSEVPIIVVSAKQTDFDKVQSFGLGADDYVTKPFSPLELTARVK
56965228	176960	Bacillus clausii KSM-K16	_ hypothetical protein ABC3466 _	20	LCVVHTAHEIETCLADFSVDIAIVYGEQSDSVAFIKQLRASDPQLPLLVLADRATYEYIKVCRDYGVNGLLSTNTNFQQLMAK
56962819	174545	Bacillus clausii KSM-K16	_ two-component response regulator _	2	ILLAEDQQIVRQGLKMMIEHRQRYQVIEAENGQEAVDLAGRHVIDLVLMDVRMPVMTGIEATKRLIERDPNVKIVMLTTFIDERYAIEALKAGAKGYILKDADMESLFATI
56962495	174221	Bacillus clausii KSM-K16	_ two-component response regulator of nitrate reduction _	2	IVIADDHAVVRSGFSMILNYQPDMEVVATAADGLEAYAMVARHRPDVLLMDLSMPPGESGLIATGKISSEFPDTKIIILTMYDDEDYLFHVLKNGAAGYVLKNAPDDELLSAI
56964906	176637	Bacillus clausii KSM-K16	_ two-component response regulator of extracellular proteinase _	2	ILLADDHHVVRKGLAYFLEAHPDIEIVAEASNGEEAVALYERHRPDILLMDIDMPVMDGIQATHVILRNHPQAKVFMLSGYGEKDFVIQALQAGACGYQLKDVEPDVLIYTI
56963198	174929	Bacillus clausii KSM-K16	_ two-component response regulator _	2	VLLAEDQVMVRQGLKAMIETDEDIKVTGEADDGRKALRLCETHVFDVAILDIRMPEMDGIEAAKMMRLRYPKMKILMLTTFDDHQYVVESLKLGVNGYMLKNGDTESLIRSI
56963890	175621	Bacillus clausii KSM-K16	_ two-component response regulator _	2	ILIVDDDALVCQSLELLLGNEDDFTVVGTANNGREALVQIEKKAPDLVLMDIRMPEMDGIESTKEIKSRWPEMLIMMLTTFQDEQNIRLALQAGAEGYLLKSTAVANMAKQI
56965136	176868	Bacillus clausii KSM-K16	_ two-component response regulator _	2	VLIVDDHETVRMGVSAFLSTQEDLHVAGEAANGEEGVKLALQLKPDVILMDLVMDGMDGIEATKQIKANWPQAKIVVVTSFVDSDKLRPVLEAGATSYVLKTSSAMQIAEAI
56962510	174236	Bacillus clausii KSM-K16	_ two-component response regulator _	2	IVIAEDQQMMLGALGALLDFEADMKVVGKAHNGEEAIKLVKALNPNICIMDIEMPVMDGLDAAYELKDHSCRVMVLTTFAQPGYFERARRAGVEGYLLKDSPSEDLAAAI
56965096	176828	Bacillus clausii KSM-K16	_ two-component response regulator _	2	ILIAEDQTILRNALESLLNLEKDIHVAGAVPSGASVRSFPGLWELDLLLMDIEMPDGTGLETAKYMKQHGFRGKIALLTTFSRPGYIEQAMKLGVDGYLLKDDPIDQLIVAI
56965753	177487	Bacillus clausii KSM-K16	_ two-component response regulator _	30	VAVIEDDIDVARFHRLFLSKVAGFELIGEAHTLEQGVHLIQTQKPDLLLLDVFVGQENGLDVLKRIRAEDTNTDVILITSANDAKTVQTGSRYGVVDYLIKPFSFARFQEAL
56962690	174416	Bacillus clausii KSM-K16	_ two-component response regulator _	30	VLIVEDDPMVAAVVKSYLRDVPGFQVAAEAGGVEEAKQHLRENKTIQLVLLDVYMPGENGLSLLPYLRENKIEADVILMTAASDKESIETALRFGAVDYILKPYQFSRFQKAL
56962786	174512	Bacillus clausii KSM-K16	_ two-component response regulator _	30	IMIAEDDYRVAEIHEQFLKKMKNVDVVAKAQNATEAVSLANMHQPDVLLLDVYLPDRLGVDVLPELHQACPDMQIVLITAATEKTIFHKALQNGVVDYLVKPIAFERLQQSV
56962440	174166	Bacillus clausii KSM-K16	_ two-component response regulator _	30	VLIVEDDPVAASVYEQLIQSKLDFTIVGKAETAKATKQLLQVITPDLVLLDVQLPDANGIDLLFHIKQLDHHVDVILITASNDAQTVGEAKRGGAFSYMLKPIIVDRFFQTL
56962500	174226	Bacillus clausii KSM-K16	_ two-component response regulator _	34	LLLVDDEEATVLGLSALPWETLGINRVHCACSASEALASLEKGNVDVVVTDIRMPGKSGIDLLAEVEKSPHAPKCLLLSGYAEFAYAQAAIQAQAVDYLLKPVSDEELMQAV
56965349	177081	Bacillus clausii KSM-K16	_ two-component response regulator _	34	VVIAEDEKMIRKGLVTIVDQLVTDFTVIGEADNGERALELLAHDCPDVLLTDIRMPKCDGLSLIREARSYYPHVKIVIVSGHEEFAYAQQAIQHGVSRYLLKPIDRTEVVLA
56962164	173887	Bacillus clausii KSM-K16	_ two-component response regulator _	34	VIIDDDEQVIEGLKGIIPWERFNMTFVGEAYDGEEGIKLIQTNQPNIVVTDIYMPVLEGLAMVKTVRDEGFAGKVVILSGFDDFEYARQALRLRVDDYLSKPASKMTIF
56965408	177140	Bacillus clausii KSM-K16	_ two-component response regulator _	34	VAIVEDEPILLKGLLYRVDWLSNDCTVVGAAEDGAEGLNLIKQTKPDIIITDIRMPFKDGLAMLKEAKADHSFEAIILSGFGEFDYAKQAITIGVHDYLLKPVDMHELEATL
56962906	174633	Bacillus clausii KSM-K16	_ two-component response regulator _	34	VLIADDEWMIREGVKNLIPWEHYGFEVASLACNGKDALEKYKHDKPDLVIADIRMPQMDGLSLLKEIRTENEAVPFLLLSGHADFHYAQEAIGHGVDGYLLKPLEEDELIEHL
56964850	176581	Bacillus clausii KSM-K16	_ two-component response regulator of extracellular degradative enzyme _	3	IVIIDDHPLFKEGVKRILSMEENFNVVADGEDGSEVIDLVRQHQPDVILMDINMPKTNGVEATKDLIKAFPKVKVIILSIHDDESYVSHVLRTGASGYLLKEMDAESLVEAVK
56964991	176722	Bacillus clausii KSM-K16	_ two-component response regulator _	46	IYIVEDDQQIRRIMADHLERYGYRVTWAENFETIKQEFVAIQPDLVLLDINLPLYDGFYWCRQIRTVSNAPVLFISARTDDMNQVMAIENGGDDYITKPFHLEVLLAKVK
56961827	173549	Bacillus clausii KSM-K16	_ transcriptional regulator _	4	ILIIDDEVEVGNFLSHLFTSKGYKVRVVNSKKEFDAIDFDHHQFQGAMIDLKLPDANGLALLKHVKRRQPHCKVIIMTGYSTIKTAVEAMKLGASDYIEKPFDDIDLLE
56965815	177549	Bacillus clausii KSM-K16	_ two-component response regulator _	5	LVADDEKYSREELLYLLGFFPQIEVVGEAASGHETAAKMMDLQPDLLFLDIEMPEMDGTEIAAIAKQMKQPPFIVFATAYPQFAVEAFQLQAKGYLIKPIDETRLAETI
56964222	175953	Bacillus clausii KSM-K16	_ stage 0 sporulation protein A _	76	VCIADDNRELVHLLSEYVGAQPDMEVIGTAFNGQECLTVVEEKMPDVLLLDIIMPHLDGLAVLERLSQREKKPQIIMLTAFGQEDVTKRAVDFGASYYVLKPFDMDALMEKI
15615278	243581	Bacillus halodurans C-125	_ two-component response regulator _	113	FITDDDVTVRSILAQIIEDEQLGQVVGEAEDGSELDGKRLNIKQVDILLIDLLMPNCDGLEAIQKIKPEFKGKIIMISQIESKELISEAYLLGIEHYIMKPINKIEVLSV
15614825	243128	Bacillus halodurans C-125	_ CheA activity modulator protein _	123	IYIAEDSAVLRNLLKDTLNEAGYVNLHFFENGKGAWEALHTLVEQHGQAATSFVDLLISDIEMPQMDGHHLTKRVKTDPVLSNLPVVIFSSLITEDLYHKGERVGADAQIGKPEIVQLVEML
15614275	242578	Bacillus halodurans C-125	_ CheA activity modulator protein _	123	VIAEDSVMLRKLLHDTLTAAGYEKLTFFENGEEAFAYLNHEKEEGTLFDNVDLVITDVEMPQMDGLHLTKKIKQDEVMGNVPVVIFSSLITKDIYFQGESVGADGQISKPEIAQLVKLI
15615530	243834	Bacillus halodurans C-125	_ two-component response regulator involved in modulation of flagellar _	18	VLVVDDAAFMRMMIKDILTKNDFEVVGEAANGEEAVQLYKEHSPDLVTLDITMPEKDGIQALKEIKAYDADAKVIMCSAMGQQAMVIDAIQSGAKDFIVKPFQGDRVIEAIN
15615007	243310	Bacillus halodurans C-125	_ two-component response regulator involved in modulation of flagellar _	18	ILIVDDASFMRMMIKDILTKNGYDVVGEAHDGEQAVEKYKELSPDLVTMDITMPEKDGIAALKDIRAIDPNAKVIMCSAMGQQAMVIDAIQAGAKDFIVKPFQADRVIDAI
15614371	242674	Bacillus halodurans C-125	_ two-component response regulator _	1	ILVADDEQEIRDLIAIHLEKEGYHVIKVSDGKEAVDVIGRQVIDLLILDIMMPNIDGYEVARQIREQHNMPIIFLSAKTSDFDKVQGLVIGADDYMTKPFAPIELVARVN
15614796	243099	Bacillus halodurans C-125	_ hypothetical protein BH2233 _	1	VIVEDQVIRSVLVNLLQRLTLEYFELDVQTFFDGEALLESSWHRSAHTHIVIMDDVLPKRNGLEMVHELRKMPNNEKYIVMMLSNRKTEEDVTYAFEMGVDDYITKPFNVK
15615586	243890	Bacillus halodurans C-125	_ hypothetical protein BH3024 _	1	VTLVEDEPSHATLIQYHLNQLGAEVTVHPSGSAFFQHRSQLSTCDLLIVSDQLVDLSIFSLLDIVKEQTKQPSVLILTTGRHELIESSEHNLSYLQKPFAISELRAAI
15615719	244023	Bacillus halodurans C-125	_ two-component response regulator involved in phosphate regulation _	1	LLVVDDEESIVTLLQFNLEQSGYEVVTAMDGASGLQLAKTQTFDLIILDLMLPEMDGLDVCKQLRQSKVMTPILMLTAKDDEFDKVLGLELGADDYMTKPFSPREVVARVR
15613383	241686	Bacillus halodurans C-125	_ two-component response regulator _	1	ILLIEDDVSISEMVKEHLQLEGYHVCCAFDGEEATRLFEQNTYDLVLLDLMLPRRNGIDCLQWIRTKSVVPVLIMSAKDSDVDKALGLGFGADDYITKPFSMIELTARVK
15613735	242038	Bacillus halodurans C-125	_ two-component response regulator _	1	VHLVEDEANLSEVLKAYLEKEGWSVRVFTDGNVAQEAISEQQPHLWILDIMLPGTDGYQLLKQIKEKGDTPVIFISARDQDLDRVLGLEMGSDDYLAKPFLPQELII
15615264	243567	Bacillus halodurans C-125	_ two-component response regulator _	1	LMLIEDDIALSSLMKEQLESDGYQVFQSDDFKTILDDFKVMKPDLVLLDINLPYSDGYFLCRSMRKQSTIPIMIISGRSSEIDQMMAIELGADDYLTKPFTLNMLLTKVK
15616589	244895	Bacillus halodurans C-125	_ two-component response regulator _	1	ILVVDDEKPIADILKFNLEKEGFTVICAYDGAEAVEQVNQEKPDLILLDIMLPNKDGMEVCREVRKQFEMPIIMLTAKDSEIDKVLGLELGADDYVTKPFSTRELLARVK
15615988	244293	Bacillus halodurans C-125	_ two-component response regulator _	1	ILIVDDEKAIVKMLETVLRKEGFSTIYTAYNAEEAFHYVKNYTLDVILLDVMLPDRSGFDLCPQIRGLTQAYILFLTAKVSDLDKLTGFAIGADDYVTKPFNPLEIVARIN
15613716	242019	Bacillus halodurans C-125	_ two-component response regulator _	1	VLVVDDDKEIREGITIYLKNEGMNVFQAKDGIEALERLNEEDIHLMLLDVMMPRLDGIQTTLKIREARNIPIIFLSAKSEEADKVLGLQVGGDDYVTKPFNPLELIARVK
15612851	241154	Bacillus halodurans C-125	_ two-component response regulator _	1	IIVVEDDSWMREELIDVLQKEGFEAVAVTDFHDIAFQIATLAPDLVLLDINLPEQSGFDICKTLKSKGIGPILILTSRDKLQDELHGLHLGADDYLIKPCNRDRLLARI
15614776	243079	Bacillus halodurans C-125	_ two-component response regulator _	2	IAVVDDHHVVRKGLIYFLETYHDFTIVGEAEDGEAALTLVEKVQPDIVLMDVIMPGINGIEATKKIKQKWPTVHVVVLSSSAERESVIPALQAGANGYQLKEVDPEMLAETI
15614686	242989	Bacillus halodurans C-125	_ two-component response regulator _	2	VLIADDQTLMREGLKTIIDLEDDMNVTGLAKNGKEVLDQIPCLLPHVILMDIQMPIMNGIECLKVVKRIYPHINVLMLTTFEDDDYIIESLVGGANGFLLKDLNYDQLIYS
15613763	242066	Bacillus halodurans C-125	_ two-component response regulator _	2	VVLVDDHEMVRMGLSAYLRTQSDIEIVGEASDGHQGVKLVQETKPDVVLMDLVMEKMDGVQATEAIMNTTEGVKVIVLTSYIDDEKVYPVIEAGAFSYLLKTSSAKEIASAI
15616404	244709	Bacillus halodurans C-125	_ two-component response regulator _	2	VLIVDDEQIEREGLKLFLKDRPNIHIVGEASNGRQAIEKALETQPDLMMMDIKMPGVDGVQAVKEIKQQLPETEFIMVSAFDTFEYAREVMRYGVKEYLLKPTTKEDVLTAL
15614660	242963	Bacillus halodurans C-125	_ two-component response regulator _	2	VLLAEDQVMVRQGLKVMIETDEDIFVTGEATNGKEAIRLCESQRFDVAVLDIRMPEMDGIEAAKVLRSRFPEMKILMLTTFDDHQYVMEALKLGVSGYMLKDGDTESLIRSI
15613614	241917	Bacillus halodurans C-125	_ two-component response regulator _	2	LLLAEDQHLVRQGLKMMIEQDETLHVIAEASNGQEAVEAYERYLIDLVLMDVRMPSKTGLEATKEIRARHPEAKILILTTFADDEYALEALKYGACGYLLKDADADRLIHSI
15616400	244705	Bacillus halodurans C-125	_ two-component response regulator _	30	VLIIEDDFRVAQIQEQMVNDHPYFHVISTCRTGGEALDYLSEKAAALDLILLDVYIPDVKGLELLWAIREKFRDVDIMMVTAAKEVDTVQEALRGGIIDYLLKPVQKEVLHQRL
15615314	243617	Bacillus halodurans C-125	_ two-component response regulator _	30	VLLIEDDPMVQEVNRMFVEKLSGFTIVGTTATGEEGMVKTRELQPDLILLDIFMPKQDGLSFIKQIREQYIDVDIIAVTAANDTKTIKTLLRYGVMDYLVKPFTFERLKAAL
15612961	241264	Bacillus halodurans C-125	_ two-component response regulator _	30	VLIVEDDPMVAEFNKRYVKNVDGFHLVGIAYHVEEAKTVIEEKKVDLILLDVYMPGENGLELLSYIRAEKLGIDVILITAASDADHIQTALRYGAVDYLIKPFEFERFEQAL
15614672	242975	Bacillus halodurans C-125	_ hypothetical protein BH2109 _	34	VLLADDEFFVRHGLKSLIEWEKCGYEVAAEADNGEDAFKLVQEIKPDLVITDIRMPVFDGLQLIQKVNETLSFNTKFIIISGYNDFSYAQKAVRFGAVDFVLKPIDQDELEAAL
15615291	243594	Bacillus halodurans C-125	_ two-component response regulator _	34	VLIVDDEKLIRQGIINFFDWEKEGFQIVGEAANGKDALELISKNEPHIVMTDIVMPVMDGIDLVKRVKRDFPEVEIIVLSSFEEFEYVRSTFHSGVADYILKPRLNEKDLLKT
15613686	241989	Bacillus halodurans C-125	_ hypothetical protein BH1123 _	34	VVIIDDEEHVVRGLKKIISWKALGCECVGEAANGRRGLDIVRETSPHIVLTDIYMPIMYGLDMIQILREDGFDGEVVILSGYSEFEHARKAMQLNITDYLSKPASVDTIET
15616008	244313	Bacillus halodurans C-125	_ hypothetical protein BH3446 _	34	VLIADDEIIIREGIRDAINWSELQLTVVAEAEDGEEALELALEHQVDILLADLNMPIMNGLTLIKQLRTALPHCKVIIITGHDEFVYAQEAIRLSVVDYIIKPVDADQLYEVL
15613356	241659	Bacillus halodurans C-125	_ two-component sensor response regulator _	34	VMLVDDEPLILEGLKHLIDWGQLGYEIVATARNGVEALEIAKYVSFDLLITDIKMPEKTGLELIAALNEREKTIRSIVLSGFQEFHFVKQGLTLGIENYLLKPINEKELISTL
15614473	242776	Bacillus halodurans C-125	_ two-component response regulator _	34	VMIVDDEAMVREGLKALISWEEYGFRVIDTARNGKEGFTKYRQLSPDLMIVDIRMPEVDGLSLIESIRAEDSAIHFIILSGHSDFNYAKKALGCQCDDYLLKPLDEDELIDSL
15615510	243814	Bacillus halodurans C-125	_ two-component response regulator in acetoacetate metabolism _	37	ILIIDDEPSICSSLQFALEDDYETEATTEVDKGLHIIEQEPIDVVLLDLKIGKVDGLEVLQEIKRKKPETIVIMITAYGTIANSVKAIRLGAYSYLTKPIHMEELFSV
15616190	244495	Bacillus halodurans C-125	_ two-component response regulator involved in degradative enzyme _	3	IVIIDDHQLFREGVKRILAMEPEFEVVADGEDGENAVELVETYNPDVILMDINMPKVNGVEATRDLIQRYPDVKVLVLSIHDDESYVTHVLKTGASGYLLKEMDADALIEAVK
15613318	241621	Bacillus halodurans C-125	_ two-component response regulator _	46	IFVIEDDRKMASIICQYFKKYGYEAQYAIDFDMIKQDFLDYRPDLVLLDINLPAFDGFYWCRQLRRLSNLPIIFLSARASEMDQVYAIENGGDDYITKPFHLEVLLAKVK
15616473	244779	Bacillus halodurans C-125	_ two-component response regulator _	46	IMLIEDDHTLFSEIKERLSQWSYDVFGVSNFEKVIEEFTSLKPDLVIIDIQLPKFDGFHWCRMIRQHSNVPIIFLSSRDHPTDMVMSMQLGADDFIQKPFHFDVLVAKI
15612834	241137	Bacillus halodurans C-125	_ two-component response regulator _	46	ILIVEDERSITHTLKKRLEKYGYECHTIEDFKRVLDVFQETEPHLVIMDINLPYFDGYYWSRKIRQISTCPIMILSARMSELDQVYGIENGADDFITKPFVMDVVLAKI
15613100	241403	Bacillus halodurans C-125	_ transcriptional regulator _	4	ILIIDDEVEVGNFLSHLFMSKGYNVTVVNSGKEFNEIDFSHQPFHAAMIDLKLPDANGLVLLKHLKRRQPHCKVIIMTGYSTIKTAVEAMKLGASDYIEKPFDDIDLLEA
15614579	242882	Bacillus halodurans C-125	_ hypothetical protein BH2016 _	5	QHKPDLIFLDINLPDINGIDFAEQVQSILPEVHIVFITAYDEYAVKAFELNAIDYVMKPVQRDRLNRTI
15614998	243301	Bacillus halodurans C-125	_ chemotaxis-specific methylesterase _	6	VLVVDDSAFMRKVITSMLESDPRLEVVGTARNGEDALKKRKTLAPDVMTLDVEMPVMDGIETLKRLMSENPLPIIIVSSTTKEGAENALTAMELGAVDFITKPSGPIS
15615336	243639	Bacillus halodurans C-125	_ two-component response regulator central for the initiation of sporulation _	76	VCIADDNRELVNLLNDYVSAQDDMEVVGVAFNGQECLSIVEERQPDVLILDIIMPHLDGLAVLEKLPYMNLQTKPNIIMLTAFGQEDVTKKAVDLGASYYVLKPFDMEILINNI
15614797	243100	Bacillus halodurans C-125	_ response regulatory protein _	8	QIVDDSQSNIRKLENLLNTHFLVTVARTGEEAVRMAKENVPDLILLEVALPDMDGFETCRRLKAQVESAKIPVIFVSSLKEKEAVIKGFEVGGQDYIIKPFEARELVLR
15613144	241447	Bacillus halodurans C-125	_ two-component response regulator _	98	IVIAEDQTMLLGAMTALLQLEDDIKIVAQARNGLEALAAIEKHQPDLCILDIELPNMTGLEVAKRIREQEWDCKMMIVTTFARASYLQQAMDLKVEGYLLKDEPIEFLVEAI
52079040	77831.1	Bacillus licheniformis ATCC 14580	_ two-component sensor histidine kinase _	109	VLIVDDNIESLKILADMLEGVPYQVIAAKSGHEALEVVSRSKLDLVILDLMMPDMTGFEVCMKIRERFTMVELPVLIITAAIIDHDKYKAFHAGANDILQKPYNYTEFAARV
52078730	77521.1	Bacillus licheniformis ATCC 14580	_ chemotaxis protein CheY _	113	FIADDDRAVRSILKQIIEDEDLGEVAGEAEDGCDLEGHVLNLQQIDILFVDLLMPLRDGIETVRHLHGVFSGKIIMISQVESKEMIGEAYSLGIEYYIHKPINRIEILNVI
52080002	78793.1	Bacillus licheniformis ATCC 14580	_ chemotaxis protein CheV _	123	LIIVEDSPLLLRLLVEKLNEAGYNNIVSFENGKDAYEHALQLMEDGTALHEKVDLMITDIEMPQMDGHRLTKLLKDNPLSTELPILIFSSLITDDLRHKGEQVGADEQISKPELNELIEKL
52080826	79617.1	Bacillus licheniformis ATCC 14580	_ two-component response regulator ResD _	138	ILVVDDEARIRRLLKMYLERENYKIEEAENGDEAIDKALGNDYDLILLDLMMPGTDGIEVCRQVRDKKATPIIMLTAKGEEANRVQGFEVGTDDYIVKPFSPREVVLRV
52080416	79207.1	Bacillus licheniformis ATCC 14580	_ two-component response regulator _	18	VLIVDDAKFMRDKIREILETEDLQVAGEAENGEEAVLLYQELQPDLVIMDITMPVKNGIEALKDMIQLNPKVKVIMCTAMRQKRIVVEAIEAGAKDFIVKPFEETKVVEAIR
52080236	79027.1	Bacillus licheniformis ATCC 14580	_ two-component response regulator _	18	ILVVDDAAFMRMMIKDILVKNGFEVVAEAQDGAQAVEKYKEHSPDLVTMDITMPEKDGITALKEIKEIDPQAKIIMCSAMGQQSMVIDAIQAGAKDFIVKPFQADRVMEAIN
52079560	78351.1	Bacillus licheniformis ATCC 14580	_ two-component response regulator _	1	VLLVDDENRMLDLLELYLEHYSCTKAATGKEALDLIKMRNFDLVILDIMMPEMDGWTVCKEIRRLTSIPVIMLTAKNGQDDIVRGLNCGADDYLTKPFSEKVLLAKI
52082613	81404.1	Bacillus licheniformis ATCC 14580	_ two-component response regulator YycF _	1	ILVVDDEKPIADILEFNLKKEGYEVHCAYDGNEALQMVEDLNPDMILLDIMLPNKDGVEVCREVRKKYDMPIIMLTAKDSEIDKVIGLELGADDYVTKPFSTRELLARVK
163119589	80203.2	Bacillus licheniformis ATCC 14580	_ two-component response regulator _	1	ILVVDDEESIVTLLKYNLERSGYHVVTAMDGEAGLLKAIEEKPDLIVLDLMLPKMDGIEVCKELRQKKLMYPILMLTAKDDEFDKVLGLELGADDYMTKPFSPREVTARVK
52081822	80613.1	Bacillus licheniformis ATCC 14580	_ two-component response regulator YvrH _	1	ILIVDDEDAIVQMVKRVLTKEGFSEVLTASSAEEALDIVKKDTVHLILLDVMMPGQTGFDVSPEIRRHTNAPIFFLTAKTSDLDKLSGFAYGADDYITKPFNPLELIARIK
52078768	77559.1	Bacillus licheniformis ATCC 14580	_ SpaR _	1	ILAVDDEKDILVLIQNILRRDQHQVHTLSQVNTESLDVFSGYDLILLDVMMPGMDGFELCEKIRPLVDCPILFLTAKTEEEAIVKGLLTGGDDYISKPFGVLELSARV
52080824	79615.1	Bacillus licheniformis ATCC 14580	_ two-component response regulator YclJ _	1	ILIIEDDEAIADLLSYGLTSEGFETCTVNNGSSGMRKLDQFKPDLLLLDWMLPDCSGLDICKKVTESCNIPILMITAKSDITDKILGLEFGADDYITKPFDLREVVARI
52078905	77696.1	Bacillus licheniformis ATCC 14580	_ sensory transduction protein YclJ _	1	ILMIEDNLSVCTMTEMFFAKEGFETEFVHDGLEGYNRFKSGDWDLLIIDIMLPSMDGVTICKKVREESTVPIIMLTAKDTESDQVLGFELGADDYVTKPFSPLALVARIK
52081787	80578.1	Bacillus licheniformis ATCC 14580	_ two-component response regulator _	1	IYLVEDEENLNELLTKYLESEGWHVTSFLNGESARQKIGQSPHLWILDIMLPDIDGYTLIKEIKNQDPEVPVIFISARDADIDRVLGLELGSSDYISKPFLPRELIIRV
52082247	81038.1	Bacillus licheniformis ATCC 14580	_ two-component response regulator _	200	ILIVDDQYGIRVLLNEVFNKEGYKTFQAANGIQALDIVKNQRPDLVLLDMKIPGMDGIEILKRMKIIDEGIRVIIMTAYGELDMIQESKELGALTHFAKPFDIDEIRDAVK
52082354	81145.1	Bacillus licheniformis ATCC 14580	_ transcriptional regulator YdfI _	2	VLIVDDHLVVREGLKLLIETNDHYIIIGEAENGKAAVRLADELKPDIILMDLYMPEMSGLEAIKLIKEKHDIPIIILTTYNEDHLMIEGIELGAKGYLLKDTSSETLFHT
163119642	80588.2	Bacillus licheniformis ATCC 14580	_ two-component response regulator LiaR _	2	VLLIDDHEMVRMGLAAFLESQPDIEVIGEASDGKRGVELALETKPDVILMDLVMEGMDGIEATKQICRQLADPKIIVLTSFVDDDKVYPVIEAGALSYLLKTSKASEIADAI
52081142	79933.1	Bacillus licheniformis ATCC 14580	_ two-component response regulator _	2	VLLVDDHMMIRKGIRVLLEGFSGIEIAGESNNGNEAVLSAGQLKPDVVLMDLSMPNGLDGFTASSEIRKLNPSVKIVILTMHDEEIFVQKAIEAGAHGYVLKNSHYRLLYQAI
52081161	79952.1	Bacillus licheniformis ATCC 14580	_ two-component response regulator responsible for cold induction of the des gene _	2	IFIAEDQQMLLGALGSLLNLEDDMEVVGKGTTGQDAVDFTKKHRPDICIMDIEMPGKTGLEAAEELKDTGCNIIILTTFARPGYFQRAIKAGVKGYLLKDSPSEELASAI
52079413	78204.1	Bacillus licheniformis ATCC 14580	_ transcriptional regulator YhcZ _	2	IIIADDHHIVRKGLLFFFKTKSDFDVIGEASTGIEALDVLRKREADIVLMDLSMPDMDGIEATKRIKKEYPSVKVIALTSYADESYVIPAIQAGACAYQLKDAEPDELVETI
163119694	81082.2	Bacillus licheniformis ATCC 14580	_ two-component response regulator _	2	VIIADDNSFIREGMKIILSTYDEFEVLATVEDGLQAVEFCRAQAVDIALLDVRMPNMDGVEAARLISETGAKPFILTTFDDDEYIVAAIRNGAKGYLLKNAEPERIRDAIK
52081648	80439.1	Bacillus licheniformis ATCC 14580	_ hypothetical protein BL02539 _	30	VLIVEDDPMVRELNKRYLSQVEGFQLKGIAASFQEALTFLREEHIDLILLDIYMPGRNGVELLTEIRRQNQAVDVIVISAASEMDVVQKTLRFGAVDYLIKPFEFERFQSAL
52079653	78444.1	Bacillus licheniformis ATCC 14580	_ two-component response regulator _	30	VFIVEDDIRNADIHQKLISKIDGFSVIGIAENFQDAKDLLPDVKPDLVLLDIFLPDGSGMELLWLIRQTLRHTDVMMITAAKEVEYVEQAIRAGAVDYLIKPIMFSRLKETL
163119196	77479.2	Bacillus licheniformis ATCC 14580	_ two-component response regulator _	30	IVIAEDDFRVAQIHERLIEQLDGFNIIGKAANAKETMEILEVRKADLLLLDIYMPDEMGTTLIPVIRKRFPEVDIMIITAATETCHLQESLRAGIVHYLIKPVTAEKFKQ
163119227	77679.2	Bacillus licheniformis ATCC 14580	_ transcriptional regulator _	34	VLIADDEPWIREGIRDAVSWERYQMSVSAEAENGEEAFELALKHGIDLLIVDLNMPIVNGIALMKKLRGALPQCRFVIVTGYDQFAYAQEAIRLNVDDYLLKPVDPAHLEQVL
52079765	78556.1	Bacillus licheniformis ATCC 14580	_ two-component response regulator YesN _	34	VLLADDERIILDGISSMIEWNSFGTSLIGAAQNGIDAYRLIMEKRPDIVISDIKMPGMGGLELIEKVSRDHPSIRFILLTGFGQFEYAKKAMSYGVRHYLLKPCNESHITDSL
52082083	80874.1	Bacillus licheniformis ATCC 14580	_ two-component response regulator _	3	IVIIDDHQLFREGVKRILDFEPTFEVVAEGDDGDEAARIVEHYHPDVVIMDINMPNVNGVEATKQLVDLYPESKVIILSIHDDENYVTHALKTGARGYLLKEMDADTLIEAVK
52081663	80454.1	Bacillus licheniformis ATCC 14580	_ two-component response regulator _	3	LLVIDDHPAVMEGTKAILETNQDFVVDCLSPEASEQFLKKHDFSAYDLILMDLNLGEINGMDLSKKILETCSSCKIIVYTGYEVEDYFEEAIRSGMHGAISKTESKEKIIEYI
52082553	81344.1	Bacillus licheniformis ATCC 14580	_ two-component response regulator _	46	VMIVEDDPKIADLLKSHIVKYGYNVHVVKDFDRVMDEFRSTAPDLVLLDINLPSFDGYYWCRQIRQESICPVLFISARTGEMDQVMALENGGDDFITKPFHAEIVMAKI
52082494	81285.1	Bacillus licheniformis ATCC 14580	_ two-component response regulator _	46	LLLIEDDESLFQEIKERLTGWSYEVYGINDFSEVMQEFAAIKPDCVIIDIQLPKYDGFHWCRQIRSRSNVPILFLSSRDHPADMVMSMQFGADDYIQKPFHFDVLIAKI
52082321	81112.1	Bacillus licheniformis ATCC 14580	_ two-component response regulator _	59	VLLVDDYRVLTSGMKEILKKYNMDVIVCHEGNEALDLLKNQEVHIDVFLYDLKMPGMNGLELSLKTLEIEPQSKIIIMFSGDEIHSYFNKLIEAGVKGFIDKSYTDSMIA
163119258	77832.2	Bacillus licheniformis ATCC 14580	_ two-component response regulator _	5	LIVDDEELALLHFKNMLERTNCFRFIEMFQDPADVLEYPDIRDIDTVFLDIEMPGINGIELAEAIQSMNENIQVVFITAYNDFAIKAFELNAVDYLLKPVDYVRLVKTI
52081393	80184.1	Bacillus licheniformis ATCC 14580	_ two-component response regulator _	5	VLIVDDEMFARDELRYLLEQTEEVDAIDEAEHIEEAFDKMADRKPDILFLDIDLSGENGFDIAQRLKKMSAPPAVVFATAYDEYALKAFEVDAIDYLTKPFDEERIRQTI
52080245	79036.1	Bacillus licheniformis ATCC 14580	_ chemotaxis-specific methylesterase _	6	VLVVDDSAFMRNMITKFLTSNHEIAVAGTARNGEEALQKIKELRPDVITLDIEMPVMNGKETLKRIMASDPLPVVMVSSLTQQGADITIECLELGAIDFVAKPSG
52080955	79746.1	Bacillus licheniformis ATCC 14580	_ two-component response regulator _	76	VCVADDNRELVGLLSEYIEGQSDMEVLGVAYNGQECLSLFKDKEPDVLVLDIIMPHLDGLAVLERLRESQLKKQPNVIMLTAFGQEDVTKKAVDLGASYFILKPFDMENLVGHI
52082580	81371.1	Bacillus licheniformis ATCC 14580	_ chemotaxis protein CheY _	98	FIAEDQRMLLSALGSLLDLEEDMEVIGQATNGEEALTAILKLEPDVCLMDIEMPVKSGLEVAEELAKQGAKTKIIILTTFARPGYFERAVKSNVHGYLLKDGEIDDLADAI
157693768	1.48823e+06	Bacillus pumilus SAFR-032	_ response regulator _	113	FIVDDDEAVRSSLAQLIEDEELGIVAGEAEDGAELTASYLNDLHIDILCIDLLMPERDGLETIRAIKDEFHGKYLMLSQVETKELIGQAYTLGVEYYVTKPINRVEVL
157691042	1.4855e+06	Bacillus pumilus SAFR-032	_ response regulator _	113	FIADDDRAIRSILGQIIEDEDLGEVVDEADDGVGLEAHSLNLKKIDILLIDLLMPARDGIQTIRHIHPEFKGKIMMISQVEAKEMMAEAYELGIEYYIHKPVNRIEIVSVI
157692077	1.48654e+06	Bacillus pumilus SAFR-032	_ chemotaxis protein CheV _	123	YVVEDSPLLMRLLTNELTEAGYKNIVTFEDGKQAYDHVMDLVSKGITVTEEIDMIITDIEMPKMDGHRLTKLLKENPLTSSIPILIFSSLITEDLRHKGETIGADDQISKPEIHQLIEKV
157692813	1.48728e+06	Bacillus pumilus SAFR-032	_ response regulator _	138	ILVVDDEARIRRLLKMYLERENYEIDEAENGDEAIQKGLQSDYDLILLDLMMPGTDGIEVCNQIRDKKATPIIMLTAKGEEANRVQGFEAGTDDYIVKPFSPREVVLRV
157692313	1.48678e+06	Bacillus pumilus SAFR-032	_ response regulator CheY _	18	VLIVDDAAFMRMMIKDILVKNGFDVVGEAENGAQAVEKYKETSPDLVTMDITMPEMDGITALKEIKQIDASAKIIMCSAMGQQSMVIDAIQAGAKDFIVKPFQADRVLEAIN
157693705	1.48817e+06	Bacillus pumilus SAFR-032	_ response regulator _	1	IYLVEDEQNLNELLTKYLESENWNVSSFLTGETAREAMNKPPHLWILDIMLPDTDGYTLIKEIKAASPDVPVIFISARDADIDRVLGLELGSSDYIAKPFLPRELIIRV
157693311	1.48777e+06	Bacillus pumilus SAFR-032	_ response regulator PhoP _	1	ILVVDDEESIVTLLSYNLERAGYDVVTARDGEEALEKAASEQPDLIVLDLMLPKMDGIEVCKQLRIQKMMFPILMLTAKDDEFDKVLGLELGADDYMTKPFSPREVGARV
157694431	1.48889e+06	Bacillus pumilus SAFR-032	_ response regulator _	1	ILVVDDEKPIADILEFNLRKEGYEVHCAYDGNEALEMVEEIKPDIILLDIMLPNKDGVEVCREVRKKYDMPIIMLTAKDSEIDKVIGLELGADDYVTKPFSTRELLARVK
157691146	1.48561e+06	Bacillus pumilus SAFR-032	_ response regulator _	1	ILMIEDNQSVCTMTEMFFQREGFQAEFVHDGQDGLNRFKQEDDWDLLILDIMLPSMDGLTICQKVRQISDVPIIMLTAKETESDQVLGFDLGADDYVTKPFSPLTLMARIK
157693669	1.48813e+06	Bacillus pumilus SAFR-032	_ response regulator _	1	ILVVEDDQDIGDLLQESLTRAGYEVLRAMNGEQALKFVDDSLDLVILDVMMPGLSGIETCQQMRASSNVPILFLTAKSSTFDKTEGLLAGGDDYMTKPFSQEELHARV
157692516	1.48698e+06	Bacillus pumilus SAFR-032	_ response regulator _	1	VLIIDDEKEILELIHTVLTREGIDRVITASTARDGLSQFHQEQPDLVILDIMLPDGEGYDICKQIRDVSHVPIIFLSAKGEESDKIVGLAIGGDDYITKPFSPKEVAYR
157693741	1.4882e+06	Bacillus pumilus SAFR-032	_ response regulator _	1	ILIADDEEAIVKMVERVLKKEGFKHIYKAYHADEALDVVKNEDIHLLLLDVMMPGKSGFDVLPEMRKFTKAPIFYLTARTSDVDKLTGFAQGADDYITKPFNPLELVARIK
157694108	1.48857e+06	Bacillus pumilus SAFR-032	_ stage 0 sporulation initiation phosphotransferase F _	200	ILIVDDQYGIRILLNEVFHKEGYQTFQAANGLQALDIVKNHRPNLVLLDMKIPGMDGIEILKRMKLIDEDIRVIIMTAYGELDMIQESKELGALTHFAKPFDIDEIRDAVK
157691669	1.48613e+06	Bacillus pumilus SAFR-032	_ transcriptional regulator _	2	VVIADDHHIVRKGLVFFLQTQPDVEIVGEASNGEEALEIVRQTRPDIVLMDLSMPVMNGIEATKQMTLEMPDTRIVILTSYADKDYVIPAIQAGAKAYQLKDVAPEKLLTT
157693347	1.48781e+06	Bacillus pumilus SAFR-032	_ response regulator _	2	IFIAEDQQMLLGALGSLLDLEDDMTVVGKGTNGQDAIDFAEKHPVDICLMDIEMPGKTGLDAAEELKGTDVKIIILTTFARSGYFQRALKAGVSGYMLKDSPSEDLASAI
157693715	1.48818e+06	Bacillus pumilus SAFR-032	_ response regulator _	2	VLLIDDHEMVRMGLAAFLEAQADIEVIGEASDGQKGVELAVELRPDVILMDLVMEGMDGIEATKRICQEIEDARIIVLTSFIDDDKVYPVIEAGALSYLLKTSKAGEIADAI
157691493	1.48596e+06	Bacillus pumilus SAFR-032	_ response regulator _	30	VLIAEDDFRIAAIHASYIQQIEGFQVAGKAKSAKDMWEALQQEQVDLILLDVYMPDELGTNLLPLLRERYPEVDVMIITAATETTLLRDALQYGVVHYLIKPVTAQKFA
157693574	1.48804e+06	Bacillus pumilus SAFR-032	_ response regulator _	30	VLIVEDDPMVGELNKRYLTQIEGFELKGIATSFQQALDMLKTEAIHLVLLDIYMPGQNGLALLSEIRKQNHSVDVIVISAANEVDVVQQTMRNGAVDYLIKPFEFERFQSAL
157691211	1.48567e+06	Bacillus pumilus SAFR-032	_ response regulator _	30	VLLIEDDPMVQEVNKEFIKSVPGFQVVAIAGNGEQGIQLIKEIRPDLVVLDVYMPKKDGMKTLQDIRKQKIQVDVIVISAAKDKETIGTMLQNGARDYIIKPFKFERMKESL
157693990	1.48845e+06	Bacillus pumilus SAFR-032	_ response regulator _	34	VLIVDDEKIERLAMRKFMTDWLPECHIAGEAENGKKAVEFVRTEPVHLVLMDIQMPGMDGLTAIKQIKAISPHTKFIMLTAYDTFDYAKQAMQEGVKQYLVKPADKDETIAAI
157693950	1.48841e+06	Bacillus pumilus SAFR-032	_ response regulator DegU _	3	IVIIDDHQLFREGVKRILDFEPTFEVVAEGDDGDEAARIVEHYHPDVVIMDINMPNVNGVEATKQLVELYPESKVIILSIHDDENYVTHALKTGARGYLLKEMDADTLIEAVK
157693590	1.48805e+06	Bacillus pumilus SAFR-032	_ response regulator ComA _	3	ILVIDDHPAVMEGTKSILESDQQLSVDCLSPDAEAAFLKTHDFSIYDVILMDLNLGDINGMDIAKQILETNQQVKIIIYTGYEVDDYFEEAIRAGLHGAISKTETKDKIIEYI
157693349	1.48781e+06	Bacillus pumilus SAFR-032	_ response regulator _	46	ILLIEDDTTLFQEIKERLVNWSYDVYGIHDFQQVMQEFTSVQPDLVIIDIQLPKYDGFHWCRMIRHHSNVPIIFLSSRDHPADMVMSMQLGADDFVQKPFHFDVLIAKV
157693294	1.48776e+06	Bacillus pumilus SAFR-032	_ response regulator _	5	VLIVDDEVLARDELKYLLHRTKEDVQIEEAENIESAFDRMVDHKPDLLFLDIDLSGENGFDIAKRLNRMSDPPAIVFATAFDQYALKAFEVSALDYLTKPFDEERLLQTI
157691047	1.48551e+06	Bacillus pumilus SAFR-032	_ response regulator _	5	LVDDYRVDLEKLHAIVGRMEAVEIVFVTQSAEDAYEKVKKGDIDLLFADIEMPGMSGYELADLIHSHALNVDVVFVTGNSGYAVHAFDLNVHDYIMKPYQADRIAKSL
157692322	1.48678e+06	Bacillus pumilus SAFR-032	_ chemotaxis-specific methylesterase _	6	VLVVDDSAFMRKLISDFLTAEQEIEVVGTARNGEDALKRIKELNPDVVTLDVEMPVLNGTEALKQILAEHDLAVIMVSSQTKQGKDLTIHCLELGAFDFVTKPSG
157692921	1.48738e+06	Bacillus pumilus SAFR-032	_ stage 0 sporulation protein A _	76	VCVADDNRELVGLLTEYIEGQEDMEVLGVAYNGQECLTLFKDKEPDVLLLDIIMPHLDGLAVLERLRENNDMTKQPSVIMLTAFGQEDVTKKAVDLGASYFILKPFDMENLVGHI
16077314	388127	Bacillus subtilis subsp. subtilis str. 168	_ two-component response regulator GlnJ for glutamine utilisation _	113	FIADDDRAVRSILRQIIEDEDLGEAAGEADDGSQVEGHMLQFKQIDILLIDLLMPGRDGIETIRQIQNTYSGKIVMISQVEAKEMVGEAYSLGIEYFIHKPINRIEIVTVL
16078465	389284	Bacillus subtilis subsp. subtilis str. 168	_ coupling protein and response regulator for CheA activity in response to attractants _chemotaxis_ _	123	LIIVEDSPLLMRLLQDELKEAGYNNIASFENGKEAYEYIMNLAENETDLSKQIDMIITDIEMPKMDGHRLTKLLKENPKSSDVPVMIFSSLITDDLRHRGEVVGADEQISKPEISDLIKKV
16078857	389677	Bacillus subtilis subsp. subtilis str. 168	_ response regulator _	18	VLVVDDAKFMRVKIREILEEANYIIAGEAADGEQAADLYKKLRPDLVTMDITMPVKNGIKALRDILTFDPKAKVIMCTAMRQQRIVTEAIELGAKDFIVKPFEETKVLEAV
16078696	389515	Bacillus subtilis subsp. subtilis str. 168	_ regulator of chemotaxis and motility _	18	ILIVDDAAFMRMMIKDILVKNGFEVVAEAENGAQAVEKYKEHSPDLVTMDITMPEMDGITALKEIKQIDAQARIIMCSAMGQQSMVIDAIQAGAKDFIVKPFQADRVLEAIN
16079963	390789	Bacillus subtilis subsp. subtilis str. 168	_ two-component response regulator _	1	ILVVDDEESIVTLLQYNLERSGYDVITASDGEEALKKAETEKPDLIVLDVMLPKLDGIEVCKQLRQQKLMFPILMLTAKDEEFDKVLGLELGADDYMTKPFSPREVNARV
16079696	390520	Bacillus subtilis subsp. subtilis str. 168	_ two-component response regulator YrkQ _	1	ILVVEDDEDIGDLLEESLTRAGYEVLRAKDGKRALQLVNDSLDLVILDIMMPGISGIETCQHIRKSSNVPILFLTARSSTLDKTEGLLAGGDDYMTKPFSEEELHARV
16081093	391921	Bacillus subtilis subsp. subtilis str. 168	_ two-component response regulator YycG _	1	ILVVDDEKPIADILEFNLRKEGYEVHCAHDGNEAVEMVEELQPDLILLDIMLPNKDGVEVCREVRKKYDMPIIMLTAKDSEIDKVIGLEIGADDYVTKPFSTRELLARVK
16080375	391202	Bacillus subtilis subsp. subtilis str. 168	_ hypothetical protein BSU33220 _	1	ILIVDDEKAIVDMIKRVLEKEGYRNILDAASAEEAIPVVKANKVDLIVLDVMMGGMSGFEACTLIREYSDAPIFFLTARSSDADKLSGFAVGADDYITKPFNPLELAARI
16077324	388137	Bacillus subtilis subsp. subtilis str. 168	_ hypothetical protein BSU02550 _	1	MLVEDDHSISEMVDHYLTKEGFGIVHAFDGEEGIRLFQQGSYDLVLLDIMLPKLNGMDFLKIIREKSNIPVLMISAKDGDVDKALGLGFGADDYIAKPFSMIELTARVK
16080354	391181	Bacillus subtilis subsp. subtilis str. 168	_ two-component response regulator _	1	IYLVEDEDNLNELLTKYLENEGWNITSFTKGEDARKKMTPSPHLWILDIMLPDTDGYTLIKEIKAKDPDVPVIFISARDADIDRVLGLELGSNDYISKPFLPRELIIRV
16077443	388257	Bacillus subtilis subsp. subtilis str. 168	_ two-component response regulator YclK _	1	ILMIEDNVSVCTMTEMFFFKEGFEAEFVHDGLEGYQRFTEENWDLIILDIMLPSMDGVTICRKIRETSTVPIIMLTAKDTESDQVIGFEMGADDYVTKPFSPLTLVARIK
16080766	391594	Bacillus subtilis subsp. subtilis str. 168	_ two-component response regulator _	200	ILIVDDQYGIRILLNEVFNKEGYQTFQAANGLQALDIVTKERPDLVLLDMKIPGMDGIEILKRMKVIDENIRVIIMTAYGELDMIQESKELGALTHFAKPFDIDEIRDAVK
16077269	388082	Bacillus subtilis subsp. subtilis str. 168	_ two-component response regulator YbdK _	27	ILIVEDDVMIGDLLQKILQREGYRVIWKTDGADVLSVIQKVDLVIMDVMLPGEDGYQMSAKIKKLGLGIPVIFLSARNDMDSKLQGLQIGEDYMVKPFDPRELLLR
16077609	388423	Bacillus subtilis subsp. subtilis str. 168	_ two-component response regulator YdfH _	2	VLIVDDHLVVREGLKLLIETNDQYTIIGEAENGKVAVRLADELEPDIILMDLYMPEMSGLEAIKQIKEKHDTPIIILTTYNEDHLMIEGIELGAKGYLLKDTSSETLFHT
16077998	388814	Bacillus subtilis subsp. subtilis str. 168	_ two-component response regulator YhcY _	2	IVIADDHHVVRKGLRFFFATQDDIEVVGEAATGLEALRVIEETKPDLVLMDLSMPEMDGIQAIKKAIQQFPDTNIIVLTSYSDQEHVIPALQAGAKAYQLKDTEPEELVKT
16080361	391188	Bacillus subtilis subsp. subtilis str. 168	_ two-component response regulator YvqE responding to cell wall stress _	2	VLLIDDHEMVRMGLAAFLEAQPDIEVIGEASDGSEGVRLAVELSPDVILMDLVMEGMDGIEATKQICRELSDPKIIVLTSFIDDDKVYPVIEAGALSYLLKTSKAAEIADAI
16077897	388711	Bacillus subtilis subsp. subtilis str. 168	_ two-component response regulator YfiJ _	2	IIITDDQDIVREGLASLLQLREELDVIATARNGQEAFEKAKELEPDIVLMDIRMPVSNGVEGTKLITSSLPSVKVLMLTTFKDSALIAEALEEGASGYLLKDMSADTIVKAV
16080942	391770	Bacillus subtilis subsp. subtilis str. 168	_ two-component response regulator YxjM _	2	VALADDQPLVREGFRYVINAQTDMTVSGEAGDGHDIIALAKQTKPDVILMDVQMPRCSGIEAAKDIMSALPNTKIVILTTFDTEEYVFEGIRAGAVGYLLKDTLPEELIDAIR
16078980	389801	Bacillus subtilis subsp. subtilis str. 168	_ two-component response regulator DesK _	2	IFIAEDQQMLLGALGSLLNLEDDMEVVGKGTTGQDAVDFVKKRQPDVCIMDIEMPGKTGLEAAEELKDTGCKIIILTTFARPGYFQRAIKAGVKGYLLKDSPSEELANAI
16077513	388327	Bacillus subtilis subsp. subtilis str. 168	_ two-component response regulator _	30	VLLIEDDPMVQEVNKDFITTVKGVTVCATAGNGEEGMKLIKEEQPDLVILDVYMPKKDGIKTLQEIRKQKLEVDVIVVSAAKDKETISLMLQNGAVDYILKPFKLERMRQAL
16080205	391031	Bacillus subtilis subsp. subtilis str. 168	_ two-component response regulator YufL _	30	VLIVEDDPMVGELNKRYLSQIDGFQLKGIASSFQSALHILGEHHIDLILLDIYMPGKNGLELLTELRAQNEAVDVIVISAASELDVIKKTLRYGAVDYLIKPFEFERFQTAL
16077826	388640	Bacillus subtilis subsp. subtilis str. 168	_ two-component response regulator _	30	IAIAEDDFRVAQIHERLIKQLDGFKIIGKAANAKETLALLKEHKADLLLLDIYMPDELGTALIPDIRSRFPEVDIMIITAATETRHLQEALRAGIAHYLIKPVTADKFRQV
16077763	388577	Bacillus subtilis subsp. subtilis str. 168	_ two-component response regulator YesM _	34	ILLADDERIILDGMAGIIEWESLGASLIGKAQNGHEAYEKIVHKQPHIVITDVKMPGMDGLELIKKVSAVSPSVQFIVLSGFGEFEYAKEAMKYGVKHYLLKPCNEQQIISSL
16080602	391429	Bacillus subtilis subsp. subtilis str. 168	_ two-component response regulator _	3	IVIIDDHQLFREGVKRILDFEPTFEVVAEGDDGDEAARIVEHYHPDVVIMDINMPNVNGVEATKQLVELYPESKVIILSIHDDENYVTHALKTGARGYLLKEMDADTLIEAVK
16080219	391046	Bacillus subtilis subsp. subtilis str. 168	_ two-component response regulator _	3	ILVIDDHPAVMEGTKTILETDSNLSVDCLSPEPSEQFIKQHDFSSYDLILMDLNLGGEVNGMELSKQILQENPHCKIIVYTGYEVEDYFEEAIRAGLHGAISKTESKEKITQYI
16080525	391352	Bacillus subtilis subsp. subtilis str. 168	_ two-component response regulator YvcQ _	46	ILLVEDDERIASLLGGHLQKYGYEVKIAEQLNDIKLEFAEMKPDLVLLDINLPFFDGFYWCRQIRTISNAPIIFISARTDELNQVMAIENGGDDYITKPFHLEVVMAKI
16081017	391845	Bacillus subtilis subsp. subtilis str. 168	_ two-component response regulator YxdK _	46	IMIVEDSEDIRGLLQNYLEKYGYQTVVAADFTAVLDVFLREKPDVVLLDINLPAYDGYYWCRQIRQHSTSPIIFISARSGEMDQVMAIENGGDDYIEKPFSYDIVLAK
16080092	390918	Bacillus subtilis subsp. subtilis str. 168	_ two-component response regulator controlling resistance to antibiotics affecting the envelope YtsB _	46	LLLIEDDESLFHEIKDRLTGWSYDVYGIQDFSQVLQEFAAVNPDCVIIDVQLPKFDGFHWCRLIRSRSNVPILFLSSRDHPADMVMSMQLGADDFIQKPFHFDVLIAKI
16077343	388156	Bacillus subtilis subsp. subtilis str. 168	_ two-component response regulator NatK _	5	LVDDYRVDLEKLEAIVSRMQDVEIVFSTDSAKEAYRRVKNGDIDLLLADIEMPHMSGYELADLIKSHSLDVDVIFVTGHGGYAVHAFDLNVHDYIMKPYYADRLAA
16079944	390770	Bacillus subtilis subsp. subtilis str. 168	_ two-component response regulator LytS _	5	VLIVDDEMLARDELAYLLKRTNDEMEINEAENIESAFDQMMDQKPDLLFLDVDLSGENGFDIAKRLKKMKHPPAIVFATAYDQYALKAFEVDALDYLTKPFDEERIQQTL
16078705	389524	Bacillus subtilis subsp. subtilis str. 168	_ chemotaxis-specific methylesterase _	6	VLVVDDSAFMRKMISDFLTEEKQIEVIGTARNGEEALKKIELLKPDVITLDVEMPVMNGTDTVRKIIEIYNLPVIMVSSQTEKGKECTINCLEIGAFDFITKPSG
16079478	390302	Bacillus subtilis subsp. subtilis str. 168	_ response regulator _	76	VCVADDNRELVSLLSEYIEGQEDMEVIGVAYNGQECLSLFKEKDPDVLVLDIIMPHLDGLAVLERLRESDLKKQPNVIMLTAFGQEDVTKKAVDLGASYFILKPFDMENLVGHI
16080459	391286	Bacillus subtilis subsp. subtilis str. 168	_ two-component response regulator YvfT _	98	FIAEDQRMLLGALGSLLDLEEDMTVIGQALNGEEALHAILKLEPDVCIMDIEMPVRSGLNVAEELMKKGCVSKVIILTTFARPGYFERAVKAGAHGYLLKDGEIDDLADAI
118478329	895480	Bacillus thuringiensis str. Al Hakam	_ response regulator _	106	IFILEDDVIQAQQMKRLVEEICEKYMLPFDFIEVTSKSENIITNIPKAKYVPIYFLDIEIKREERKGLHVAQEIRKYDTQGIIVFVTTHSEFAPISYQYMVSALTFIDKGLP
118478444	895595	Bacillus thuringiensis str. Al Hakam	_ response regulator _	113	IVDDEKAVRSMLAQIIEDEDLGEVTGEAEDGLSLEQHMPILKKIDILFIDLLMPIQDGIKTIRQIKPSFKGKIIMVSQVESKELIAEAYSLGVEYYIIKPINRIEVLTVV
118477274	894425	Bacillus thuringiensis str. Al Hakam	_ response regulator _	113	IVDDDEVFRSMLSQIIEDGDLGEVIGESEDGAFIEAEQLNYKKVDILFIDLLMPMRDGIETVRHIASSFTGKIIMISQVESKQLIGEAYTLGVEYYITKPLNKIEVVSVV
118477191	894342	Bacillus thuringiensis str. Al Hakam	_ chemotaxis protein _	123	IYIAEDSAMLRQILEETLSSAGYTKMNFFSNGAEALAQIEKLAKEQGEKMFEHIHLLITDIEMPKMDGHHLTKVVKDSEVMNRLPVIIFSSLITNELFHKGEAVGANAQVSKPDIQELIG
118477032	894183	Bacillus thuringiensis str. Al Hakam	_ DNA-binding response regulator _	138	ILIVDDEDRIRRLLKMYLEREQYTIEEADNGDTALEMALQNDYDLILLDLMMPGKDGIEVCKGVREKKATPIIMLTAKGEEVNRVQGFEVGTDDYIVKPFSPREVVLRV
118477165	894316	Bacillus thuringiensis str. Al Hakam	_ chemotaxis protein _	18	ILVVDDAMFMRTMIKNLLKSNSEFEVIGEAENGVEAIQKYKELQPDIVTLDITMPEMDGLEALKEIIKIDSSAKVVICSAMGQQGMVLDAIKGGAKDFIVKPFQADRVIEAL
118478527	895678	Bacillus thuringiensis str. Al Hakam	_ two-component response regulator _	1	ILLADDDKHIRELLHYHLQKEGFKVFEAEDGKVAQDVLEKENIHLAIVDIMMPFVDGYTLCEEIRKYHDIPVILLTAKDQLVDKEKGFISGTDDYIVKPFEPAEVI
118480165	897316	Bacillus thuringiensis str. Al Hakam	_ response regulator _	1	VLVIKNERSLAKKIVSGLTQEGHFILKLHNENEGLNIIYEQDWDIIILDWDSLSISGPEICRQIRLVKMTPIIIVTDNISSKDCVAGLQAGADDYIRKPFAKEELVARVQ
118477956	895107	Bacillus thuringiensis str. Al Hakam	_ DNA-binding response regulator _	1	ILIIDDDKEIVELLAVYLRNEGYNIYKAYDGDDALQMISTYEVDLMILDIMMPKRNGLEVCQEVRENNTVPILMLSAKAEDMDKILGLMTGADDYMIKPFNPLELVARVK
118478209	895360	Bacillus thuringiensis str. Al Hakam	_ two-component response regulator _	1	VLIADDEQDMLRILKAYFEKEGFEVFLAKDGEEALQIFYDEKIDLAILDWMMPKHSGITVCQEIKKNSSVKVLMLTAKSESEDELAALQSGADEYVKKPFHPGVLITRA
118476036	893187	Bacillus thuringiensis str. Al Hakam	_ DNA-binding response regulator _	1	ILIADDDKEIRNLLKIYLERELYMVDTAIDGEVALQLFNQNNYSLVILDLMMPKVDGIEVCRKLRDKTNVPILMLTAKDHEVDKILGLSIGADDYITKPFSIHEVVARVK
118480494	897645	Bacillus thuringiensis str. Al Hakam	_ DNA-binding response regulator _	1	ILVVDDEKPIADILKFNLEKEGFEIVMAHDGDEAIEKATEEQPDMVLLDIMLPGKDGLEVCREIRKSSEMPIIMLTAKDSEIDKVLGLELGADDYVTKPFSTRELLARVK
118477336	894487	Bacillus thuringiensis str. Al Hakam	_ two-component response regulator _	1	ILIVDDDQDIVRFVNANLMQEGFKVLSAHNGEEALKIINNNSIQLAILDIMMPHMDGIELCRRIREKHSLPIMFLSAKSSDVDKVIGFSTGADDYIVKPFSTIEFIARV
118478544	895695	Bacillus thuringiensis str. Al Hakam	_ vancomycin response regulator _	1	VLIVEDEREIADLVELYLKNENYTVFKYYTAKEALECIDKNAIDLAILDIMLPDVSGLTICQKIREKHTYPIIMLTAKDTEVDKITGLTIGADDYITKPFRPLELIARVK
118479736	896887	Bacillus thuringiensis str. Al Hakam	_ alkaline phosphatase synthesis response regulator _	1	ILVVDDEEFILTLIEFNLQQAGFEVITAMDGEMALQKATTERPDLIILDLMLPKMDGMEVCKELRLQRVMTPILMLTAKDDEFDKVLGLELGADDYMTKPFSPREVVARVK
118477352	894503	Bacillus thuringiensis str. Al Hakam	_ response regulator DrrA _	1	ILIVDDEQEIRIMIERFLRKEGFFRIYTAVDCASALSFCQVDNPDIVILDVMLPDGDGFSLLSSIRKFSSTPVLFLSARGEDEDRLLGLGLGADDYMVKPFLPRELVLR
118476709	893860	Bacillus thuringiensis str. Al Hakam	_ response regulator _	1	ILLVDDETAILQLLTTILEKEGFSHITTATSAEMALSLTQQNDYDLIILDVMLPGQSGFDICPIIRQKTDCPIFFLTAKTADLDKISGFSHGADDYITKPFNPLEVVARM
118480370	897521	Bacillus thuringiensis str. Al Hakam	_ stage 0 sporulation protein F _	200	ILIVDDQYGIRVLLHEVFQKEGYQTFQAANGFQALDIVKKDNPDLVVLDMKIPGMDGIEILKHVKEIDESIKVILMTAYGELDMIQEAKDLGALMHFAKPFDIDEIRQAVR
118478844	895995	Bacillus thuringiensis str. Al Hakam	_ transcriptional regulatory protein _	257	VLLVEDERRLREIVSDYFRNEGFEVIEAEDGKKALELFAEHEIDLIMLDIMLPEIDGWSVCRRIRKESAVPIIMLTARSDEDDTLLGFELGADEYVTKPFSPKVLVARA
118476026	893177	Bacillus thuringiensis str. Al Hakam	_ DNA-binding response regulator _	258	ILVVDDEKEIRNLITIYLKNEGYKVLQAGDGEEGLRLLEENEVHLVVLDIMMPKVDGIHMCMKIREEKEMPIIMLSAKTQDMDKILGLTTGADDYVTKPFNPLELIARIK
118480301	897452	Bacillus thuringiensis str. Al Hakam	_ DNA-binding response regulator _	295	ILVVDDESSIRNLIRMQLEMEGYEVLTAADGREALERWNEGPDVLILDVMLPDTDGYELLRLFREKDRDIPVLMLTAKSQMNDKLLGLQLGADDYVTKPFNYAELILRV
118477643	894794	Bacillus thuringiensis str. Al Hakam	_ DNA-binding response regulator _	297	ILIVEDEEKIARVVQLELEFEGYESEIAKTGTEAMENFENGNWDLILLDVMLPNISGLEVLRRIRLKNAVIPIILLTARDSVVDKVSGLDQGASDYITKPFQIEELLARI
118480442	897593	Bacillus thuringiensis str. Al Hakam	_ DNA-binding response regulator _	2	VLLVDDHTVVLKGLAFFLSTQEDIELVGEASNGKEALVKVGETNPDVVLMDLYMPEMDGVEATACIKKEYPDVKVIVLTSFSDQAHVLPALRAGASGYILKDVEPDQLVEAIR
118477263	894414	Bacillus thuringiensis str. Al Hakam	_ response regulator _	2	ILIADDNSFIREGMKIILNTYEEFEVVDTVNDGKEAVEYCKKNDVDIALLDVRMPNMNGVEATKLICEETETKPLILTTFDDDEYILDAVKNGAKGYLLKNNDPERIRDAIK
118476998	894149	Bacillus thuringiensis str. Al Hakam	_ response regulator _	2	VLLVDDHEMVRMGVSAYLSTQPDIEVVGEAENGRKGSELALQLRPDIILMDLVMDEMDGVEATRAIIQEWPEAKIVVVTSFLDDEKLYPVIEAGATSYLLKTSRASDIADAV
118478620	895771	Bacillus thuringiensis str. Al Hakam	_ DNA-binding response regulator _	2	LLVVDDQALITNSLEQILENQTDFIVVGKAYDGSEALILCEQLQPDIVLMDIQMPEMNGIEALLEMKRRWPNMKIVLMTTFEDSLQAATALEHGAEGYMLKSIHPQEMKEAL
118477693	894844	Bacillus thuringiensis str. Al Hakam	_ DNA-binding response regulator _	2	LLLVEDHHIVRRGLVFFLKTREEFEIVGEAENGEDALTFVRTERPDVVLMDLSMPKMDGIEATKQIKQYDETIKILILSSFSEQDYVLPALEAGADGYQLKEVQPEQLVASI
118478475	895626	Bacillus thuringiensis str. Al Hakam	_ salavaricin two-component response regulator _	2	ILLIDDHALFAKSLEIALEDYPEIDAFHSLQNIENVITMIKQFKPDIILLDINLSNISSEDGLEVAKMILDSKCNTKIVILTGYDLPVYQYEAQKLGVSGFINKNILPEVLVQIL
118479970	897121	Bacillus thuringiensis str. Al Hakam	_ DNA-binding response regulator _	300	ILIADDEAEIADLIEIHLEKEGYHVVKAADGEEAIHIIETQPIDLVVLDIMMPKMDGYEVTRQIRAKHHMPIIFLSAKTSDFDKVTGLVLGADDYMTKPFTPIELVARVN
118479688	896839	Bacillus thuringiensis str. Al Hakam	_ DNA-binding response regulator _	301	ILLVEDDLSIQEMVEKYLVKEGFQVTIASDGEEGVNTYLKGSFDLIILDIMMPKLDGLEVVRIIREKSAVPILMMSAKDTDVDKAVGLGLGADDYICKPFSMIELAARVK
118476273	893424	Bacillus thuringiensis str. Al Hakam	_ response regulator _	302	ILLVDDEERMLRLLDLFLSPRGYFCMKATSGLEALKLIEQKDFDIILLDVMMPNMDGWDTCYQIRQISNVPIIMLTARNQNYDMVKGLTMGADDYITKPFDEHVLVARI
118476873	894024	Bacillus thuringiensis str. Al Hakam	_ response regulator _	306	VLVVDDESDMRQLVGMYLDNFGYEWGEAENGKEALKKLETDHYDFVVLDIMMPEMDGLSVCKEIRKTSDVPIIFLTAKGEEWNRVNGLRMGADDYIVKPFSPGELIARM
118476560	893711	Bacillus thuringiensis str. Al Hakam	_ two-component response regulator _	30	VAIAEDDFRVAQIQEEFLSKIKDVKVIGKALNAKETIELLQKEEIDLLLLDNYLPDGIGTDLLPKIHADFPDVDVIMVTAANENHMLEKAIRNGVSNYLIKPVTLEKFVRTI
118476265	893416	Bacillus thuringiensis str. Al Hakam	_ response regulator _	30	VLIVEDDPMVAMLNAHYLEQVGGFELVQAVNSVKSAIEVLEESRIDLVLLDIFMPEETGFELLMYIRNQEKEIDIMMISAVHDMGSIKKALQYGVVDYLIKPFTFERFKEAL
118476248	893399	Bacillus thuringiensis str. Al Hakam	_ response regulator _	30	VLIVEDDIRIADIHRRFTEKVEGFKVIGTATTGEQAKEWLDLVKPQLVLLDVYLPDMQGTELVTYIRHHLHDTDIIMITAASETDVVKHALRGGVTDYIVKPLMFDR
118476337	893488	Bacillus thuringiensis str. Al Hakam	_ DNA-binding response regulator _	311	ILLVDDEPRMLELLTLYLTPIGYNCVCAVSGEEAISHIENRNFKFILLDIMMRKMDGWETCKRIRSFSNVPIIMVTARDQTVDVIQGLKLGADDYVTKPFHEEELFARI
118480119	897270	Bacillus thuringiensis str. Al Hakam	_ response regulator _	328	ILVIEDNPDIQELIREFLMAQNFTVDVVGAGTEGILLFQKNSYDLVLLDVMLPDIDGYSICKIMRGQSDVPIIMLTGLHNEESEIKGFELGIDDYITKPFHYTVFIKRV
118480448	897599	Bacillus thuringiensis str. Al Hakam	_ response regulator _	341	LIMEEVEERRSLAEKFTENIRNVECFEANTGTESLFMMKKHTPDFVFLNSKLIDGTGFEYASLLREVNCYTKFIFMGEDIEESITAFRFQAFYYLLRPFREEDL
118477412	894563	Bacillus thuringiensis str. Al Hakam	_ DNA-binding response regulator _	351	ILIVDDDPHIRELVSVFLEREGFQTYEAIDGLDALQKINEVKVDMVILDIMMPNMDGFDVCFELRKYYDIPILMLTAKGETSQKVKGFHLGTDDYLVKPFDPIELVVRVK
118478501	895652	Bacillus thuringiensis str. Al Hakam	_ two-component response regulator _	357	VLIVEDEQDLQNILVKRLNAEHYSVDACGNGEDALDYINMATYDLIVLDIMIPGINGLQVLQKLRADNHTTPVLLLTAKDTIDDRVKGLDLGADDYLVKPFAFDELLARI
118476625	893776	Bacillus thuringiensis str. Al Hakam	_ DNA-binding response regulator _	362	VLIVDDHFVVREGLKLIIETSDSFQIIGEAENGEEALSFIEKKKPDVILMDLNMPKMSGLETIEALNKKQNHTPIIILTTYNEDELMLKGIELGAKGYLLKDTDRENLFRTL
118477427	894578	Bacillus thuringiensis str. Al Hakam	_ DNA-binding response regulator _	372	ILVIEDEIPIRSFIVLNLKRAGFYVLEASTGEEALQILCEHTVDVALLDVMLPGMDGFQVCKAIREENKKIGIIMLTARVQNEDKVQGLGIGADDYIAKPFSPVELTARI
118479940	897091	Bacillus thuringiensis str. Al Hakam	_ two-component response regulator _	374	ILIVEDEDILREILKDYFLSEQYVVFEARDGKEALVVFEEEEVDLVILDIMLPELDGWSVCRRIRKTSEVPIIMLTARVDEDDTLLGFELGADDYVTKPYSPPILLAR
118476319	893470	Bacillus thuringiensis str. Al Hakam	_ DNA-binding response regulator _	3	ILVVDDHAFLRDAIRSILEDESDMNVVGEASSGDGVLEKVEACRPDCILMDINLPGKNGIEATELVKKNYPNCRVLVFTMYEHDEYLMDALQAGADGYLLKDSSSEQVVAAI
118479595	896746	Bacillus thuringiensis str. Al Hakam	_ DNA-binding response regulator _	46	ILIVEDDEKIAGILEEHLERYGYQSFRASDLRHIKDEFVKVNPHLVLLDINLPYFDGFYWCRQIRTVSNAPIIFVSARTGEMDQVMAIENGGDDYITKPFHLDVVMAKV
118477989	895140	Bacillus thuringiensis str. Al Hakam	_ response regulator _	46	IMIVEDDMKIAELLSTHVAKYGYEGIIVSDFQNVLNIFLEEQPELVLLDINLPSFDGYYWCRQIRGVSTCPILFISAREGTMDQVMALENGGDDFISKPFHYEVVMAKI
118479956	897107	Bacillus thuringiensis str. Al Hakam	_ DNA-binding response regulator _	46	ILIVEDDPNISSLLQSHIQKYGYEAVVAENFDDIMESFNAVKPHLVLLDVNLPKFDGFYWCRQIRHESTCPIIFISARAGEMEQIMAIESGADDYITKPFHYDVVMAKI
118476259	893410	Bacillus thuringiensis str. Al Hakam	_ response regulator _	53	LLVVEDNASLLESIVQILHDEFEVDTALNGEEGLFLALQNIYDVILLDVMMPEMDGFEVIQKIRDEKIETPVLFLTARDSLEDRVKGLDFGGDDYIVKPFQAPELKARI
118480470	897621	Bacillus thuringiensis str. Al Hakam	_ response regulator _	5	VLVVDDEMLARDELKYLLERTKEVEIIGEADCVEDALEELMKNKPDIVFLDIQLSDDNGFEIANILKKMKNPPAIVFATAYDQYALQAFEVDALDYILKPFDEERIVQTL
118479363	896514	Bacillus thuringiensis str. Al Hakam	_ stage 0 sporulation protein A _	76	VCLVDDNKELVSMLESYVAAQDDMEVIGTAYNGQECLNLLKDKQPDVLVLDIIMPHLDGLAVLEKMRHIERLRQPSVIMLTAFGQEDVTKKAVDLGASYFILKPFDMENLTSHI
118476616	893767	Bacillus thuringiensis str. Al Hakam	_ sigma factor sigB regulation protein _	8	ILIVDDNPVNIFVIEKILKQAGYQDLVSLNSAQELFEYIQFGKDSSRHNEIDLILLDIMMPEIDGLEVCRRLQKEEKFKDIPIIFVTALEDANKLAEALDIGAMDYITKPINKVELLARM
118480385	897536	Bacillus thuringiensis str. Al Hakam	_ DNA-binding response regulator _	98	IIIAEDQRMLRGALGALLDLEDDIEVIGQAANGEEALKLIESLKPDVSIMDIEMPIQSGLDVAETLKKENSACKVMILTTFARPGYFERAMKAGVHGYLLKDSPSEDLSASI
163939653	1.64454e+06	Bacillus weihenstephanensis KBAB4	_ response regulator receiver protein _	113	IVDDDEVFRSMLSQIIEDGDLGEVIGESEDGAFIEADQLNFKKVDILFIDLLMPMRDGIETVRHIASSFSGKIIMISQVESKQLIGEAYTLGVEYYITKPLNKIEVISVV
163939562	1.64445e+06	Bacillus weihenstephanensis KBAB4	_ response regulator receiver modulated CheW protein _	123	IYIAEDSAMLRQILEETLSSAGYTKMNFFSNGAEALAQIEKLAKEQGEKMYEHIHLLITDIEMPKMDGHHLTKVIKDSEVMNQLPVIIFSSLITNELFHKGEAVGANAQVSKPDIQELIG
163939390	1.64427e+06	Bacillus weihenstephanensis KBAB4	_ two component transcriptional regulator _	138	ILIVDDEDRIRRLLKMYLEREQYTIEEADNGDTALEMALQNDYDLILLDIMMPGKDGIEVCKGIREKKATPIIMLTAKGEEVNRVQGFEVGTDDYIVKPFSPREVVLRV
163939535	1.64442e+06	Bacillus weihenstephanensis KBAB4	_ response regulator receiver protein _	18	ILVVDDAMFMRTMIKNLLKSNSEFEVIGEAENGVEAIQKYKELQPDIVTLDITMPEMDGLEALKEIMKIDSSAKVVICSAMGQQGMVLDAIKGGAKDFIVKPFQADRVIEAL
163943307	1.64254e+06	Bacillus weihenstephanensis KBAB4	_ two component transcriptional regulator _	1	ILVVEEGITIRNFIVLIMNRAGFNALAADTGETALELLGKHNVDIILIDVMLPGIDGFQVCKSIRENNKNIGIIMLSARVQDRDKVQGLTIGADDYIEKPFSSIELTARV
163940906	1.64579e+06	Bacillus weihenstephanensis KBAB4	_ two component transcriptional regulator _	1	ILLADDDKHIRELLHYHLQKEGFKVFEAEDGKVAQGVLEKENIHLAIVDIMMPFVDGYTLCEEIRKYHDIPVILLTAKDQLVDKEKGFISGTDDYIVKPFEPAEVI
163942811	1.6477e+06	Bacillus weihenstephanensis KBAB4	_ two component transcriptional regulator _	1	VLVIKNERSFAKKIVSGLTQEGYFILKLHNENQGLNIVYEQDWDIIILDWDSLSISGPEICRQIRLVKTTPIIIVTDNISSKDCIAGLQAGADDYIRKPFVKEELVARVQ
163940843	1.64573e+06	Bacillus weihenstephanensis KBAB4	_ two component transcriptional regulator _	1	ILIVEDEDILREIMKDYLLNEGYNVLEAIDGKEALSIFEEHEVHLIILDIMLPELDGWAVCRRIRKKSNVPIIMLTARVDEDDTLLGFEMGADDYVTKPYSPPILLAR
163943423	1.64265e+06	Bacillus weihenstephanensis KBAB4	_ two component transcriptional regulator _	1	LLLEDEVEIGSTLEMILRSENYHIDWFTTGDEAVNAAVSNDYDLMILDVMLKKTVGELNTRISNGLEVARLVNQKKKIPYLLLTSRSEPLDIMQGLDMGAEDYITKPYDLTVLLARI
163943242	1.64247e+06	Bacillus weihenstephanensis KBAB4	_ two component transcriptional regulator _	1	ILIVEDEENIREVCKRYLEREEYEVYTAVNGTEGWDVFLTHQPDLIILDLMMPKKDGWELCGEIRQQSNVPIIMLTAKGEERDRILGLTMGADDYLTKPFSPRELVLRV
163940611	1.6455e+06	Bacillus weihenstephanensis KBAB4	_ two component transcriptional regulator _	1	VLIADDEQDMLKILKAYFEKEGFEVLLAKDGEEALQIFYDEKIDLAILDWMMPKSSGITVCQEIKKNSSVKVLMLTAKSESEDELAALQTGADEYVKKPFHPGVLITRA
163938276	1.64316e+06	Bacillus weihenstephanensis KBAB4	_ two component transcriptional regulator _	1	ILIADDDKEIRDLLKRYLERELYMVDTAINGEEALCLFNQNNYNLVILDLMMPKVDGIEVCRKLRDTTNIPILMLTAKDHEVDKILGLSIGADDYITKPFSIHEVVARVK
163943146	1.64803e+06	Bacillus weihenstephanensis KBAB4	_ two component transcriptional regulator _	1	ILVVDDEKPIADILKFNLEKEGFEIVMAHDGDEAIEKANEEQPDMVLLDIMLPGKDGLEVCREIRKSSEMPIIMLTAKDSEIDKVLGLELGADDYVTKPFSTRELLARVK
163940332	1.64522e+06	Bacillus weihenstephanensis KBAB4	_ two component transcriptional regulator _	1	ILIIDDDKDIVELLAVYLRNEGYNIYKAYDGDEALQMICTYEVDLMLLDIMMPKRNGLEVCQEVRENNTVPILMLSAKAEDMDKILGLMTGADDYMIKPFNPLELVARVK
163942322	1.64721e+06	Bacillus weihenstephanensis KBAB4	_ two component transcriptional regulator _	1	ILVVDDEEFILTLIEFNLQQAGFEVITAMDGEMALQKATTERPDLIILDLMLPKMDGMEVCKELRLQRIMTPILMLTAKDDEFDKVLGLELGADDYMTKPFSPREVVARVK
163939018	1.6439e+06	Bacillus weihenstephanensis KBAB4	_ two component transcriptional regulator _	1	ILLIDDETAILQLLTTILEKEGFSHITTATSAEIALSLTEQNNYDLIILDVMLPGQSGFDICPILRQKTDCPIFFLTAKTSDVDKVSGFSYGADDYITKPFNPLEVVARM
163943024	1.64791e+06	Bacillus weihenstephanensis KBAB4	_ response regulator receiver protein _	200	ILIVDDQYGIRVLLHEVFQKEGYQTFQAANGFQALDIVKKDNPDLVVLDMKIPGMDGIEILKHVKEIDESIKVILMTAYGELDMIQEAKDLGALMHFAKPFDIDEIRQAVR
163941207	1.64609e+06	Bacillus weihenstephanensis KBAB4	_ two component transcriptional regulator _	257	VLLVEDERRLREIVSDYFRNEGFEVIEAEDGKKALELFAEHEIDLIMLDIMLPEIDGWSVCRRIRKESAVPIIMLTARSDEDDTLLGFELGADEYVTKPFSPKVLVARA
163942544	1.64743e+06	Bacillus weihenstephanensis KBAB4	_ two component transcriptional regulator _	257	ILIVEDEDILREILKDYFLSEQYKVLEARDGKEALVLFEEEEVDLVILDIMLPELDGWSVCRRIRKTSGVPIIMLTARVDEDDTLLGFELGADDYVAKPYSPPILLAR
163942563	1.64745e+06	Bacillus weihenstephanensis KBAB4	_ two component transcriptional regulator _	258	ILIVDDEKEIRKLIAIYLKNEGYEVLQAGDGEEGLEIVKKRDVHLIVLDIMMPKIDGIHMCMKVREIAEMPIIMLSAKTQDMDKILGLTTGADDYVAKPFNPLELIARIK
163938261	1.64315e+06	Bacillus weihenstephanensis KBAB4	_ two component transcriptional regulator _	258	ILVVDDEKEIRNLITIYLKNEGYKVLQAGDGEEGLRILEENEVHLVVLDIMMPKVDGIHMCMKVREAKEMPIIMLSAKTQDMDKILGLTTGADDYVAKPFNPLELIARIK
163939801	1.64469e+06	Bacillus weihenstephanensis KBAB4	_ two component transcriptional regulator _	259	ILIVDDDPHIRELVSVFLEREGFQTYEAVDGLDALRKIEEVKVEMAIIDIMMPNMDGFDLCYELRKYYDIPILMLTAKGETSQKVKGFHLGTDDYLVKPFDPLELVVRV
163942945	1.64783e+06	Bacillus weihenstephanensis KBAB4	_ two component transcriptional regulator _	295	ILVVDDESSIRNLIRMQLEMEGYEVLTAADGREALERWNEQPDVLILDVMLPDTDGYELLRLFREKERDIPVLMLTAKSQMNDKLLGLQLGADDYVTKPFNYAELILRV
163943094	1.64798e+06	Bacillus weihenstephanensis KBAB4	_ two component LuxR family transcriptional regulator _	2	VLLVDDHTVVLKGLAFFLSTQEDFELVGEANNGKEALVKVGETSPDVVLMDLYMPEMDGIEATACIKKEYPNVKVIVLTSFSDQAHVLPALKAGASGYILKDIEPDQLVEAIR
163939641	1.64453e+06	Bacillus weihenstephanensis KBAB4	_ two component LuxR family transcriptional regulator _	2	ILIADDNSFIREGMKIILNTYEEFEVLDTVNDGKEAVAYCKKYEVDIALLDVRMPNMNGVEATKLICEETKTKPLILTTFDDDEYILDAVKNGAKGYLLKNNDPERIRDAIK
163939354	1.64424e+06	Bacillus weihenstephanensis KBAB4	_ two component LuxR family transcriptional regulator _	2	VLLVDDHEMVRMGVSAYLSTQPDIEVVGEAENGRKGSELALQLRPDIILMDLVMDEMDGVEATRAIIQEWPEAKIVVVTSFLDDEKLYPVIEAGATSYLLKTSRASDIADAV
163940056	1.64494e+06	Bacillus weihenstephanensis KBAB4	_ two component LuxR family transcriptional regulator _	2	LLLVEDHHIVRRGLVFFLKTREEFEIIGEAANGEEALTFVQTERPDVVLMDLSMPKMDGIEATKRIKQYDETIKILMLSSFSEQDYVLPALEAGADGYQLKEVQPDQLVASI
163940925	1.64581e+06	Bacillus weihenstephanensis KBAB4	_ two component LuxR family transcriptional regulator _	2	LLIVDDQPFVRESLRTLLDRYEDLNVVGLAEDGNQAIDLCGRLQPHVILMDLDMQHMDGVEATKKIKQQWPHIRVLIFTTFQDTEQALESLRNGADGFLLKSIETLELANTI
163942589	1.64747e+06	Bacillus weihenstephanensis KBAB4	_ two component transcriptional regulator _	300	ILIADDEAEIADLIEIHLEKEGYHVVKAADGEEAMHIIQTQPIDLVVLDIMMPKMDGYEVTRQIRGKHHMPIIFLSAKTSDFDKVTGLVLGADDYMTKPFTPIELVARVN
163942268	1.64715e+06	Bacillus weihenstephanensis KBAB4	_ two component transcriptional regulator _	301	ILLVEDDISIQEMVETYLVKEGFQVTIASDGEEGVNAFLKGSFDLIILDIMMPKLDGLEVVRIIREKSAIPILMMSAKDTDVDKAVGLGLGADDYICKPFSMIELAARVK
163938509	1.64339e+06	Bacillus weihenstephanensis KBAB4	_ two component transcriptional regulator _	302	ILLVDDEERMLRLLDLFLSPRGYFCMKATSGLEALELIEQKDFDIILLDVMMPNMDGWDTCYQIRQISNVPIIMLTARNQNYDMVKGLTMGADDYITKPFDEHVLVARI
163939206	1.64409e+06	Bacillus weihenstephanensis KBAB4	_ two component transcriptional regulator _	306	VLVVDDESDMRQLVGMYLDNFGYEWGEAENGKEALRKLETDHYDFVVLDIMMPEMDGLSVCKEIRKTSDVPIIFLTAKGEEWNRVNGLRMGADDYIVKPFSPGELIARM
163938816	1.6437e+06	Bacillus weihenstephanensis KBAB4	_ response regulator receiver _	30	VAIAEDDFRVAQIQEEFLSKIKDVKVIGKALNAKETMELLQKEEIDLLLLDNYLPDGIGTDLLPKIHADFPNVDVIMVTAANENHMLEKAIRNGVSNYLIKPVTLEKFVRTI
163938483	1.64337e+06	Bacillus weihenstephanensis KBAB4	_ response regulator receiver _	30	VLIVEDDIRIAEIHRRFTEKIEGFKVIGTATTGEQAKEWLEFVKPQLVLLDVYLPDMQGTELVTYIRHNLHDTDIIMITAASETDVVRHALRGGVTDYIVKPLTFDRFKTS
163938501	1.64339e+06	Bacillus weihenstephanensis KBAB4	_ response regulator receiver _	30	VLIVEDDPMVAMLNTHYLEQVGGFELVHAVNSVKEAIEVLERSRVDFILLDIFMPEETGFELLMYIRNQEKEIDIMMISAVHDMGSIKKALQYGVVDYLIKPFTFERFKEAL
163938574	1.64346e+06	Bacillus weihenstephanensis KBAB4	_ two component transcriptional regulator _	311	ILLVDDEPRMLELLTLYLTPIGYNCVCAVSGEEAISHIENRNFKFVLLDIMMPKMDGWETCKRIRSFSNVPIIMVTARDQTVDVVQGLKLGADDYVTKPFHEEELFARI
163942751	1.64764e+06	Bacillus weihenstephanensis KBAB4	_ two component transcriptional regulator _	328	ILVIEDNPDIQELIREFLMAQNFTVDVVGAGTEGILLFQKNSYDLVLLDVMLPDIDGYSICKIMRGQSDVPIIMLTGLHNEESEIKGFELGIDDYITKPFHYTVFIKRV
163943100	1.64798e+06	Bacillus weihenstephanensis KBAB4	_ LytTR family two component transcriptional regulator _	341	LLIMEETEERRKLVENFTENIRNVECFEAKTGTESLLIMKKHTPDFVFLNSQLMDGTGFEYSSLLREVNCYTKFIFIGEDIEEAITAFRFQAFYYLLRPFREEDL
163940874	1.64576e+06	Bacillus weihenstephanensis KBAB4	_ two component transcriptional regulator _	357	VLIVEDEKDLQNILVKRLNAEYYSVDGCGNGEDALDYISMATYDLIVLDIMIPGIDGLQVLQRLRADNNTTPVLLLTAKDTIDDRVTGLDLGADDYLVKPFAFDELLARI
163940379	1.64526e+06	Bacillus weihenstephanensis KBAB4	_ two component transcriptional regulator _	360	ILVVEDDQEIQELIKQFLMTQQYTVVVASDGLEGMTQFNKQSFDLILLDVMMPNLNGFEVSKMIRSQSNVPIIMLTALEEEEDQMKGFDLGIDDYITKPFSFHVLIRRV
163943206	1.64244e+06	Bacillus weihenstephanensis KBAB4	_ two component transcriptional regulator _	360	ILVIEDDQEIQELIKQFLLTQQYTVEVASDGLEGMIQFNKQSFDLILLDVMMPNLNGFEVAKMIRSQSNVPVIMLTALEEEQDQMKGFDLGIDDYITKPFSFHVLIRRV
163938916	1.6438e+06	Bacillus weihenstephanensis KBAB4	_ two component LuxR family transcriptional regulator _	362	VLIVDDHFVVREGLKLIIETSDSFQIIGEAANGEEALSFIEKKKPDVILMDLNMPKMSGLETIEALNKKQNHTPIIILTTYNEDELMLKGIELGAKGYLLKDTDRENLFRTL
163940265	1.64515e+06	Bacillus weihenstephanensis KBAB4	_ two component transcriptional regulator _	46	IMIVEDDIKIAELLGTHIEKYGYQSVMIEDFENVLDTFQKIKPDLVLLDVNLPNFDGYYWCRQIRAISTCPIVFLSARSGEMDQVMALENGGDDYITKPFYYEVVMSKI
163942188	1.64707e+06	Bacillus weihenstephanensis KBAB4	_ two component transcriptional regulator _	46	ILIVEDDEKIAEILEEHLERYGYQSFRVSDLRHIKDEFVKVSPHLVLLDINLPYFDGFYWCRQIRTVSNAPIIFVSARTGEMDQVMAIENGGDDYITKPFHLDIVMAKV
163940488	1.64537e+06	Bacillus weihenstephanensis KBAB4	_ two component transcriptional regulator _	46	IMIVEDDIKIAELLSTYVAKYGYQGIIVTDFQNVLDIFLEEQPELVLLDINLPSFDGYYWCRQIRGVSTCPILFISAREGTMDQVMALENGGDDFIPKPFHYEVVMAKI
163940281	1.64517e+06	Bacillus weihenstephanensis KBAB4	_ two component transcriptional regulator _	46	IMIVEDDQKISKLLQSHINKYGYEGNITEDFENILANFEKIQPDLVLLDVNLPSFDGFYWCRQIRTVSTCPIIFISARSGEMEQVMALEHGADDYITKPFHYEVVMAKI
163942574	1.64746e+06	Bacillus weihenstephanensis KBAB4	_ two component transcriptional regulator _	46	ILIVEDDPNISSLLQSHIQKYGYDAVVAENFDDIMESFNAVKPHLVLLDVNLPKFDGFYWCRQIRHESTCPIIFISARAGEMEQIMAIESGADDYITKPFHYDVVMAKI
163938495	1.64338e+06	Bacillus weihenstephanensis KBAB4	_ two component transcriptional regulator _	53	LLVVEDNASLLESIVQILRDEFEVDTAMNGEDGLFLALQNIYDAILLDVMMPEMDGFEVIQKIRDEKIETPVLFLTARDSLEDRVKGLDFGGDDYIVKPFQAPELKARI
163943122	1.64801e+06	Bacillus weihenstephanensis KBAB4	_ LytTR family two component transcriptional regulator _	5	VLVVDDEMLARDELKYLLEKTKEVEIIGEADCVEDALEELMKNKPDIVFLDIQLSDDNGFEIANILKKMKNPPSIVFATAYDQYALQAFEVDALDYILKPFDEERIVQTL
163938904	1.64379e+06	Bacillus weihenstephanensis KBAB4	_ GAF sensor hybrid histidine kinase _	71	ILIVDDDHRNIFALQNALEKQHANIITAQNGIECLEILKSNTNIDLILMDIMMPNMDGYETMEHIRMNLGLHEIPIIALTAKAMPNDKEKCLSAGASDYISKPLNLHQLYS
163941929	1.64681e+06	Bacillus weihenstephanensis KBAB4	_ sporulation transcriptional activator Spo0A _	76	VCLVDDNKELVSMLESYVAAQDDMEVIGIAYNGQECLNLLKEKQPDILVLDIIMPHLDGLAVLEKMRHIERLRQPSVIMLTAFGQEDVTKKAVDLGASYFILKPFDMENLTSHI
163938902	1.64379e+06	Bacillus weihenstephanensis KBAB4	_ response regulator receiver modulated serine phosphatase _	8	ILIVDDNPVNIFVIEKILKQAGYQDLVSLNSAQELFEYIHFGKDSSRHNEIDLILLDIMMPEIDGLEVCRRLQNEEKFKDIPIIFVTALEDANKLAEALDIGAMDYITKPINKVELLARM
163943040	1.64792e+06	Bacillus weihenstephanensis KBAB4	_ two component LuxR family transcriptional regulator _	98	IIIAEDQRMLRGALGALLDLEDDIEVVGQAANGEEALKLIESLKPDISIMDIEMPIQSGLDVAEILKKEKSSCKVMILTTFARPGYFERAMKAGVHGYLLKDSPSEDLASAI
60682967	213111	Bacteroides fragilis NCTC 9343	_ putative response regulator _	0	ILVAEDDDSNFKLIKAIIGKKCDILWAKNGEEMLNLYREHTQDAHAILMDIKMPIMNGLEATRIIREEGASLPIIMQTAYAFSSDRENAMQAGASEVLVKPITVSALR
60681532	211676	Bacteroides fragilis NCTC 9343	_ putative two-component system sensor kinase/response regulator fusion protein _	0	ILIAEDTDSNFDLLNAILGRKYRLVRARDGMEAVTMYDEVNPDLILMDIKMPNLDGLEATRIIRQLSAEVPIIAQSAYAYEHDRNAAEEAGCNDFISKPIAQEKLKEKIK
60682125	212269	Bacteroides fragilis NCTC 9343	_ putative two-component system sensor kinase/response regulator fusion protein _	0	VLVVEDISSNYLLISAMLSKHYNLLHAVNGEQAVAMVKEYKIDLLLMDMKMPVMDGLTATAEIRKFDTNIPIVALTAHAFESDKVAALKSGCNDYLVKPVDKARLMSVL
60680665	210809	Bacteroides fragilis NCTC 9343	_ putative two-component system sensor histidine kinase/response regulator fusion protein _	0	ILIAEDVESSYLQINAFLKKEYTILWVPNGEEAVKSFIREKPDLILMDIRMPVMNGIQATAKIRAISQEIPIIAITAYAFCPEGERALEAGCNEVIAKPYPLEKLKETI
60679924	210068	Bacteroides fragilis NCTC 9343	_ putative two-component system sensor histidine kinase _	104	VLLVEDNVELLQVLKEIFSSLYQVVTAANGEEGLKQAFAEVPDLIVSDVMMPVMTGTEMCLKIKNNINLCHIPVVLLTALDTVDQNIEGLRRGADDYITKPFNAKILITR
60682769	212913	Bacteroides fragilis NCTC 9343	_ putative two-component system sensor kinase/response regulator fusion protein _	104	IMVIDDDNSMLWFVSELFADKYNVRSFDNAKDALSSLEQKQPDLIISDVMMPGIDGLSFAQKIKQHKLWSHIPLILLSALHHEDDQVKGIESGAEAYVTKPFNVKYLEKI
60679627	209771	Bacteroides fragilis NCTC 9343	_ AraC family/two component family regulatory protein _	128	ELSNYLHKAFSILFRITILENPEQILHFSGDRLPDIIVIDETVNGIRGKEICSKIKSNTSMVHIPVILLISNNDNGSYLAHADCGV
60683600	213744	Bacteroides fragilis NCTC 9343	_ putative two-component system sensor kinase/response regulator fusion protein _	165	VLLVEDNPDINNILKSKLLRLYKVKTAYNGQEAVELLKTHIIDIIISDIMMPYMDGYELSKYIKTSREYSHIPVILITSQPSKENELQGLSAGADAYIEKPFTFDELNLR
60679869	210013	Bacteroides fragilis NCTC 9343	_ putative two-component system sensor histidine kinase/response regulator fusion protein _	165	ILLVEDNVDLLNLTRESLSTWFKVLKAQNGRQALEVLANETVDVIVSDVMMPEMNGLELTAKVKSDIEYSHIPVILLTAKTTLEAKVEGFECGADVYIEKPFSIRQLRKQI
60683701	213845	Bacteroides fragilis NCTC 9343	_ putative two-component system sensor kinase/response regulator fusion protein _	165	ILVVEDNPDMLAFIRKQLTTEYSVLTAMNGIEALAVLDNHYVNLVVSDVMMPQMDGFELCKTIKSDLSYSHIPVVLLTAKTNIQSKIEGLELGADAYIEKPFSVEYLLANI
60681087	211231	Bacteroides fragilis NCTC 9343	_ putative two-component response regulator _	1	ILVVDDEEDLCEILKFNLENEGYEVDTANSAEEALKMNISSYHLLLLDVMMGEISGFKMANLLKKDKKTAQVPIIFITAKDTENDTVTGFNLGADDYISKPFSLREVIARVK
60681930	212074	Bacteroides fragilis NCTC 9343	_ putative two component system response regulator _	245	ILIVDDNEDVLFALNLLLEPYTEKIKVATTPDRIEHFMTTFGPDIILLDMNFSRDAISGQEGFESLEQILKIDPQAIVIFMTAYADTDKAVRAIKAGATDFIPKPWEKEKLLATL
60681577	211721	Bacteroides fragilis NCTC 9343	_ putative two-component response regulator transcriptional regulatory protein _	245	ILIADDNEDILFTLKMLLRPIAESISITTDPRELLPILSRTHYDVILLDMNFRNDAVSGREGFHWLEEILKLDSGAVVIFITAYADTEKAVRAIKLGATDFIAKPWQNDKMIATV
60683477	213621	Bacteroides fragilis NCTC 9343	_ putative two-component system sensor histidine kinase/response regulator fusion protein _	266	ILIVEDEKELREYLIESFTETFKKVYAADNAISALETCRKKQPSIIVSDVMMPQMDGFELCRQIKNDIRISHIPVILLTARYDQTGITTGYKSGADSYIPKPFDLAFL
60683738	213882	Bacteroides fragilis NCTC 9343	_ putative two-component system sensor kinase/response regulator fusion protein _	266	VLVVEDDPDVRYSLRKELSANFQVEVAGNGNEALDLLGQGDAFHLILSDVLMPGMNGFQLVNRVKNDLAFSHIPIILLTALSEDSQRIYGIAEGADEYIPKPFNIDFLK
60682624	212768	Bacteroides fragilis NCTC 9343	_ putative two-component system sensor kinase/response regulator fusion protein _	307	LLIVEDNDELRNYLTHTLSDNYTIQTCSNGKEALTIVKEYMPELIISDIMMPEMRGDELCAAIKNDIETSHIPIILLTALNDEKNILEGLKIGADEYIVKPFNIGILKATI
[truncated: 15,552 more rows]
